# Supplementary material for: A strategy to disentangle direct and indirect effects on (de)phosphorylation by chemical modulators of the phosphatase PP1 in complex cellular contexts
Source: Royal Society of Chemistry journal article supplement (doi:10.1039/d3sc04746f), 2024-01-01
Supplement: d3sc04746f2.zip [file d3sc04746f2.zip]

## Sheet: Phosphoprot. PDP treatment
Significant PDPm-Nal vs Ctrl	p-value (-log10) PDPm-Nal vs Ctrl	log2-fold change (PDPm-Nal/Ctrl)	Significant PDP-Nal vs Ctrl	p-value (-log10) PDP-Nal vs Ctrl	log2-fold change (PDP-Nal/Ctrl)	Significant PDP-Nal vs PDPm-Nal	p-value (-log10) PDP-Nal vs PDPm-Nal	log2-fold change (PDP-Nal/PDPm-Nal)	Proteins	Positions within proteins	Leading proteins	Protein	Protein names	Gene names	Amino acid	known PP1 substrate site	known PP1 substrate protein but unknown site	known PP1 interactor	dephosphorylated by PP1 in vitro in lysate	dephosphorylated by PP1 in vitro after IP	Sequence window	Total intensity Ctrl Rep1	Total intensity Ctrl Rep2	Total intensity Ctrl Rep3	Total intensity PDP-Nal Rep1	Total intensity PDP-Nal Rep2	Total intensity PDP-Nal Rep3	Total intensity PDPm-Nal Rep1	Total intensity PDPm-Nal Rep2	Total intensity PDPm-Nal Rep3	Charge	Reverse	Potential contaminant	Localization probability	PEP	Score	Delta score	Score for localization	Mass error [ppm]	Intensity	Position	Sum	Sum empty	Reporter intensity corrected 0___1	Reporter intensity corrected 0___2	Reporter intensity corrected 0___3	Reporter intensity corrected 1___1	Reporter intensity corrected 1___2	Reporter intensity corrected 1___3
	0.577326	0.0869433	+	2.51624	0.577856	+	2.16519	0.490913	A1L170	258	A1L170	A1L170	Uncharacterized protein C1orf226	C1orf226	S						ESWEDGSPPPQARTSSLDNEGPHPDLLSFE_	14.7519	14.7625	14.6325	15.415	15.1427	15.3228	14.8741	14.7001	14.8335	2			0.885152	0.000274295	102.08	83.947	82.663	0.098006	84493000	258	293936	0	22770	0	0	21045	0	0
	0.579961	-0.0888468	+	3.98242	1.1881	+	4.48036	1.27695	A1L390	1081	A1L390	A1L390	Pleckstrin homology domain-containing family G member 3	PLEKHG3	S						AGGGRPRGPPVNRSHSVPENMVEPPLSGRVG	17.0407	17.1359	16.9346	18.2779	18.1236	18.2741	16.9857	16.8768	16.9822	3			0.865296	4.81e-06	147.28	108.49	147.28	-0.39592	149070000	1081	1777520	906	108000	0	0	104280	0	0
	0.347294	-0.192854	+	2.61017	1.62196	+	2.77417	1.81482	A1L390	614	A1L390	A1L390	Pleckstrin homology domain-containing family G member 3	PLEKHG3	S						LDQASVIAERFVSSFSRRSSVAQEDSKSSGF	13.1612	12.6994	13.1998	14.7729	14.8608	14.2926	12.9988	12.4975	12.9855	2			0.999706	0.0511006	66.299	38.995	66.299	0.48805	30638000	614	129402	0	7717.9	0	0	5236	0	0
	0.0397543	-0.0132211	+	1.63227	-0.52377	+	2.14665	-0.510549	Q9P265	100	Q9P265	Q9P265	Disco-interacting protein 2 homolog B	DIP2B	S						YHRTRSGGARDERYRSDIHTEAVQAALAKHK	20.4677	20.5714	20.8366	20.0513	20.2891	19.9641	20.5919	20.665	20.5792	3			0.997473	2.81e-22	243.7	202.16	243.7	0.25188	602770000	100	13186300	20958	1110900	0	0	1057500	0	0
	0.199806	-0.022934	+	4.52417	0.958483	+	4.3668	0.981417	A1L390	640	A1L390	A1L390	Pleckstrin homology domain-containing family G member 3	PLEKHG3	S						KSSGFGSPRLVSRSSSVLSLEGSEKGLARHG	17.1564	17.2152	17.2474	18.1716	18.225	18.0979	17.2463	17.1797	17.1243	2			0.91533	0.000783894	135.84	104.95	108.97	-1.8626	95274000	640	1847060	0	25364	91482	0	23174	86834	0
	0.584793	-0.238995	+	1.57425	0.782743	+	2.23441	1.02174	A1L390	962	A1L390	A1L390	Pleckstrin homology domain-containing family G member 3	PLEKHG3	S						PPLQWEKVAPERDGKSPTVPCLQEEAGEPLG	18.2255	17.7157	17.808	18.5005	18.5676	19.0293	17.5826	17.5861	17.8634	4			0.882613	4.6e-05	94.203	70.762	94.203	-0.7388	204790000	962	2790170	3500.9	241750	0	0	154160	0	0
	0.0505938	-0.0169137	+	2.96049	-1.23079	+	3.68698	-1.21388	Q08AD1	1004	Q08AD1	Q08AD1	Calmodulin-regulated spectrin-associated protein 2	CAMSAP2	T						PRPNELKITPLNRTLTPPRSVDSLPRLRRFS	17.8507	17.5216	17.4991	16.3632	16.5657	16.2502	17.58	17.6374	17.6033	3			0.999155	0.000139572	132.51	71.963	132.51	0.86882	264120000	1004	1453780	6912.4	187350	0	0	135250	0	0
	0.308553	0.202022	+	2.26354	1.21384	+	2.56815	1.01182	A6ND36	634	A6ND36	A6ND36	Protein FAM83G	FAM83G	S						YFEVREHSVPLRRRHSEQVANGPTPPPRRQL	11.4211	11.9185	12.1719	13.0815	12.9983	13.0733	12.3152	12.0055	11.7968	4			0.999997	0.00932858	62.362	46.42	62.362	-2.025	7734700	634	51119.2	0	2363.4	0	0	3092.3	0	0
	0.628093	-0.353584	+	1.9406	-0.981755	+	0.993989	-0.628171	Q9H9J4	1007	Q9H9J4	Q9H9J4	Ubiquitin carboxyl-terminal hydrolase 42	USP42	S						DRHAPEHHPGHGDRLSPGERRSLGRCSHHHS	14.609	14.2432	14.5484	13.3168	13.2726	13.8659	13.7994	14.5537	13.9867	6			1	5.36e-05	112.88	105.29	63.165	-0.061603	21855000	1007	156361	0	20661	0	0	14828	0	0
	0.38949	0.108431	+	1.69261	0.533074	+	1.83974	0.424644	A6ND36	650	A6ND36	A6ND36	Protein FAM83G	FAM83G	S						EQVANGPTPPPRRQLSAPHITRGTFVGPQGG	14.2086	14.4356	14.5823	15.0482	14.7571	15.0204	14.4992	14.6013	14.4513	3			0.999977	0.00248845	102.52	67.799	102.52	-0.54301	102610000	650	236545	0	15735	0	0	16882	0	0
	0.37318	-0.0400689	+	2.84656	-0.25352	+	2.58475	-0.213451	Q9H6Z4	101	Q9H6Z4	Q9H6Z4	Ran-binding protein 3	RANBP3	S						PPFPRELAGRSAGGSSPEGGEDSDREDGNYC	19.527	19.6039	19.4963	19.2977	19.2839	19.2852	19.558	19.5006	19.4485	3			0.993239	3.79e-34	231.07	209.06	65.301	0.30695	1170900000	101	6507040	16749.6	0	558100	27804	0	524000	26730
	0.187772	0.108421	+	1.7204	0.857196	+	1.33731	0.748775	G3V0H7	4	G3V0H7	G3V0H7	Putative solute carrier organic anion transporter family member 1B7	SLCO1B7	S						____________MKISTTQIERRFEISSSLV	17.5185	17.6865	17.2593	18.2242	18.0976	18.7141	17.3153	17.9384	17.5359	2			0.995804	0.00413892	119.21	22.585	119.21	-0.52969	549250000	4	2272850	0	149470	0	0	151160	0	0
	0.343749	-0.0600084	+	2.35422	-0.343796	+	2.49638	-0.283788	Q5VUA4	1010	Q5VUA4	Q5VUA4	Zinc finger protein 318	ZNF318	S						SREPTEKPGKAEKSKSPEKVSSFSNSSSNKE	17.7244	17.8683	17.918	17.4848	17.4769	17.5176	17.71	17.8574	17.7633	3			0.844153	2.55e-06	143.98	104.77	143.98	0.32536	156020000	1010	1944590	2950.7	171930	0	0	170880	0	0
	0.718525	0.223974	+	3.1087	1.31963	+	3.66794	1.09566	O00231	14	O00231	O00231	26S proteasome non-ATPase regulatory subunit 11	PSMD11	S				yes		__MAAAAVVEFQRAQSLLSTDREASIDILHS	14.4583	14.8338	14.4327	15.7728	15.9373	15.9735	14.7013	14.906	14.7895	3			0.894201	4.56e-07	112.11	90.712	112.11	-1.0395	46284000	14	357686	971.07	18649	0	0	22081	0	0
	0.0180294	0.00499916	+	1.69179	-0.994291	+	1.72544	-0.99929	Q5T200	1014	Q5T200	Q5T200	Zinc finger CCCH domain-containing protein 13	ZC3H13	S						KKKSIEKKRKKSKGDSDISDEEAAQQSKKKR	17.5665	17.7855	17.5576	16.8239	16.9661	16.1367	17.5332	17.6985	17.6929	2			0.998742	0.00296379	99.092	74.71	99.092	0.21051	117870000	1014	1524460	2651	0	154430	0	0	161590	0
	0.0848719	-0.0251087	+	1.58477	-0.333379	+	1.86844	-0.308271	Q9NWH9	1014	Q9NWH9	Q9NWH9	SAFB-like transcription modulator	SLTM	S						SNASPINRIVQISGNSMPRGSGSGFKPFKGG	15.6692	15.6459	15.3988	15.3047	15.1577	15.2514	15.4939	15.4803	15.6644	2			0.999888	1.05e-07	181.08	122.85	181.08	0.1179	79752000	1014	406345	0	42492	0	0	38181	0	0
	0.948791	-0.129099	+	2.25266	-0.39054	+	1.93332	-0.261442	Q9UQ35	1014	Q9UQ35	Q9UQ35	Serine/arginine repetitive matrix protein 2	SRRM2	S						VKAQTPPGPSLSGSKSPCPQEKSKDSLVQSC	22.3783	22.3548	22.2076	21.8561	22.0166	21.8964	22.1299	22.2487	22.1749	3			0.994961	6.75e-25	239.87	205.71	180.65	-0.37455	14858000000	1014	42080900	56894	2660300	1413800	0	2232200	1287600	0
	0.300421	0.0508219	+	2.95871	0.749133	+	3.43477	0.698311	O00401	256	O00401	O00401	Neural Wiskott-Aldrich syndrome protein	WASL	Y						ISEAQLKDRETSKVIYDFIEKTGGVEAVKNE	17.2144	17.0361	17.2501	17.7968	17.9838	17.9675	17.2349	17.2375	17.1807	2			1	0.00277444	124.98	63.021	124.98	0.40052	243950000	256	1702770	1416.5	121540	0	0	97495	0	0
	0.791404	-0.314679	+	1.55946	0.648096	+	3.41077	0.962776	O00429	529	O00429	O00429	Dynamin-1-like protein	DNM1L	S						EQRRNRLARELPSAVSRDKSSKVPSALAPAS	15.8576	16.4703	16.1452	16.8302	16.9176	16.6696	15.7511	15.9178	15.8601	3			0.989967	0.0549818	40.066	23.434	40.066	-0.12032	94179000	529	757919	2261.3	48303	0	0	66566	0	0
	0.0180294	0.00499916	+	1.69179	-0.994291	+	1.72544	-0.99929	Q5T200	1017	Q5T200	Q5T200	Zinc finger CCCH domain-containing protein 13	ZC3H13	S						SIEKKRKKSKGDSDISDEEAAQQSKKKRGPR	17.5665	17.7855	17.5576	16.8239	16.9661	16.1367	17.5332	17.6985	17.6929	2			0.999982	0.00296379	99.092	74.71	99.092	0.21051	117870000	1017	1524460	2651	0	154430	0	0	161590	0
	0.866081	0.113077	+	1.31047	-0.451526	+	1.69923	-0.564603	Q86UU1	1017	Q86UU1	Q86UU1	Pleckstrin homology-like domain family B member 1	PHLDB1	S						SPSPKSALLTQNGTGSLPRNLAATLQDIETK	16.7749	16.7417	16.5827	15.9954	16.5147	16.2345	16.7947	16.8056	16.8381	2			0.997324	3.1e-06	161.26	139.87	161.26	-0.071071	106280000	1017	904293	0	90132	0	0	79939	0	0
	0.129127	0.0572316	+	1.37547	-0.52314	+	2.75896	-0.580371	Q8TB72	102	Q8TB72	Q8TB72	Pumilio homolog 2	PUM2	S						SGGLGVSMVEYVLSSSPADKLDSRFRKGNFG	16.4573	16.218	15.9009	15.8178	15.5862	15.6027	16.2939	16.2193	16.2347	3			0.846215	1.41e-17	166.2	146.12	166.2	-0.12693	107850000	102	615323	0	72626	0	0	56152	0	0
	0.326844	0.0634804	+	1.60812	0.274366	+	2.40907	0.210885	O00571;O15523	594;592	O00571	O00571	ATP-dependent RNA helicase DDX3X;ATP-dependent RNA helicase DDX3Y	DDX3X;DDX3Y	S						HYKGSSRGRSKSSRFSGGFGARDYRQSSGAS	18.2106	18.3439	18.0842	18.4996	18.5177	18.4445	18.2987	18.2218	18.3086	2			1	0.000978453	163.64	72.32	93.325	0.50664	330040000	594	3029250	4445.2	239330	0	0	235470	0	0
+	1.75183	0.653506	+	3.20507	1.08454	+	1.44439	0.431032	O00571	606	O00571	O00571	ATP-dependent RNA helicase DDX3X	DDX3X	S						SRFSGGFGARDYRQSSGASSSSFSSSRASSS	14.6924	14.7581	14.4201	15.752	15.7466	15.6256	15.42	15.3986	15.0125	2			0.986959	4e-06	156.41	139.17	156.41	-0.30895	64531000	606	370298	0	21868	0	0	20982	0	0
	0.601682	0.208645	+	3.0988	1.61548	+	3.87379	1.40683	O00571	619	O00571	O00571	ATP-dependent RNA helicase DDX3X	DDX3X	S						QSSGASSSSFSSSRASSSRSGGGGHGSSRGF	13.8562	13.7684	13.3643	15.3385	15.0992	15.3977	13.8115	13.8734	13.9299	3			0.805506	8.76e-06	113.13	91.228	113.13	0.063529	171240000	619	213351	0	12382	0	0	10765	0	0
+	1.99351	0.516307	+	4.12586	1.90522	+	3.85198	1.38892	O00571	90	O00571	O00571	ATP-dependent RNA helicase DDX3X	DDX3X	S						RSDSRGKSSFFSDRGSGSRGRFDDRGRSDYD	18.3733	18.4543	18.1533	20.3241	20.2775	20.095	18.9354	18.711	18.8834	3			0.999946	0.000336177	117.48	80.888	113.59	-0.033148	1352700000	90	6517960	10761	267310	0	0	253670	0	0
	1.2845	0.174013	+	2.84097	-0.446012	+	3.89404	-0.620026	O14917	1026	O14917	O14917	Protocadherin-17	PCDH17	S						LIANVKPYLKAKRALSPLLQEVPSASSSPTK	15.6779	15.7432	15.564	15.2599	15.2012	15.186	15.8319	15.8998	15.7754	2			1	6.5e-06	126.19	89.664	126.19	0.058114	88699000	1026	446984	0	42747	0	0	40769	0	0
	0.614201	-0.174146	+	3.10846	1.15628	+	4.21858	1.33043	O00712	264	O00712	O00712	Nuclear factor 1 B-type	NFIB	S						YYHDMNSGVNLQRSLSSPPSSKRPKTISIDE	18.0601	18.3474	17.9656	19.3609	19.2964	19.1846	18.0306	17.975	17.845	2			0.987372	0.00232344	119.94	84.667	119.94	-0.45757	185020000	264	3672120	2032.4	216040	0	0	236030	0	0
	0.891113	0.489461	+	2.59656	1.60082	+	2.31314	1.11136	O00750	225	O00750	O00750	Phosphatidylinositol 4-phosphate 3-kinase C2 domain-containing subunit beta	PIK3C2B	S						EEEVLGGGGQGRLLGSVDYDGINDAITRLNL	11.7719	11.4877	12.1901	13.6467	13.3749	13.2306	12.2888	12.047	12.5822	2			0.999993	0.00117567	88.73	72.302	88.73	-1.1104	18287000	225	61774.1	0	3000.1	0	0	2312.8	0	0
	1.53439	-0.194663	+	3.15403	-1.19525	+	3.01955	-1.00059	Q9P1Y5	1031	Q9P1Y5	Q9P1Y5	Calmodulin-regulated spectrin-associated protein 3	CAMSAP3	S			yes			TRPRSGCCDDSALARSPARGLLGSRLSKIYS	15.4383	15.6114	15.4494	14.1084	14.5018	14.3032	15.3357	15.2761	15.3033	3			0.99515	0.0218848	55.33	44.515	55.33	-2.008	28113000	1031	316062	0	36318	0	0	37304	0	0
	0.459652	-0.0525913	+	2.13016	0.254967	+	4.21895	0.307559	O14497	1184	O14497	O14497	AT-rich interactive domain-containing protein 1A	ARID1A	S						PHSQIPPLPGMSRSNSVGIQDAFNDGSDSTF	17.7991	17.772	17.6417	17.9898	17.9682	18.0198	17.6712	17.6822	17.7017	3			0.996513	1.19e-36	256.75	227.17	256.75	0.30307	253060000	1184	2109240	1880.5	180890	0	0	160130	0	0
	0.817432	-0.407303	+	1.803	0.935753	+	3.49511	1.34306	O14544	311	O14544	O14544	Suppressor of cytokine signaling 6	SOCS6	S						MLQSPRAGHDDVPPLSPLLPPMQNNQIQRNF	15.9264	15.2201	15.3559	16.5721	16.2821	16.4555	15.114	14.9458	15.2206	3			1	0.000380147	82.849	60.127	82.849	-1.9507	73165000	311	528238	0	50616	0	0	28652	0	0
	0.897641	-0.417214	+	1.27486	0.785573	+	1.55222	1.20279	O14617	658	O14617	O14617	AP-3 complex subunit delta-1	AP3D1	S				yes		AVFHEEEQRRPKHRPSEADEEELARRREARK	13.2042	13.0671	13.1467	13.5113	13.7888	14.4746	12.9415	12.296	12.9289	3			1	0.00761713	71.558	48.42	71.558	0.015931	26599000	658	99792	0	7947.3	0	0	6709.1	0	0
	0.0553202	0.0160656	+	2.68867	-1.13072	+	2.95251	-1.14678	Q14847	104	Q14847	Q14847	LIM and SH3 domain protein 1	LASP1	T						EFEKNKGKGFSVVADTPELQRIKKTQDQISN	21.7212	21.534	21.4093	20.452	20.6344	20.1859	21.655	21.5425	21.5152	2			1	2e-28	273.99	213.44	268.38	-0.18774	2255800000	104	22644700	30749	2605700	0	0	2023800	0	0
+	1.65354	1.3603	+	2.69382	2.71882	+	2.62417	1.35851	O14617	9	O14617	O14617	AP-3 complex subunit delta-1	AP3D1	S						_______MALKMVKGSIDRMFDKNLQDLVRG	14.4829	15.6972	15.1108	18.1061	17.7118	17.6294	16.3519	16.7214	16.2985	3			1	0.0435615	51.927	14.451	51.927	0.058148	70915000	9	1159810	1953.4	18963	0	0	39525	0	0
	0.165386	-0.0511462	+	2.20992	-0.503049	+	2.54551	-0.451903	Q5TAX3	104	Q5TAX3	Q5TAX3	Terminal uridylyltransferase 4	ZCCHC11	S						VLRDQSHCKAKKFPNSPVKAEKATISQAKSE	17.7576	17.996	17.6827	17.2848	17.3241	17.3183	17.6779	17.8961	17.7088	3			1	0.0266185	56.482	37.158	56.482	0.44978	110920000	104	1848460	5809.5	175860	0	0	186240	0	0
	0.568142	0.212291	+	1.16243	-0.435836	+	2.31418	-0.648128	A1L390	1040	A1L390	A1L390	Pleckstrin homology domain-containing family G member 3	PLEKHG3	S						RTTSPGGRPSARSPLSPTETFSWPDVRELCS	13.0958	13.0788	13.5395	12.9464	12.8272	12.633	13.4949	13.5422	13.3139	2			0.979761	0.0134207	67.275	42.932	67.275	1.2979	18960000	1040	85102.9	0	7381.8	0	0	6762.4	0	0
	0.235575	-0.0692387	+	2.87824	0.922401	+	3.77877	0.991639	O14639	452	O14639	O14639	Actin-binding LIM protein 1	ABLIM1	S						EGYQDVRDRMIHRSTSQGSINSPVYSRHSYT	17.4137	17.6516	17.3008	18.3515	18.3054	18.4763	17.3957	17.4703	17.2923	2			0.998165	1.95e-14	220.27	188.46	220.27	1.1913	122860000	452	2156930	2094.9	139180	0	0	147640	0	0
	0.139893	0.0802164	+	2.4452	0.616212	+	1.13091	0.535995	O14639	455	O14639	O14639	Actin-binding LIM protein 1	ABLIM1	S						QDVRDRMIHRSTSQGSINSPVYSRHSYTPTT	12.8498	13.0116	13.0007	13.569	13.7197	13.4221	13.4316	12.7434	12.9278	2			0.991437	0.000929529	100.23	85.077	100.23	-2.2405	24555000	455	87811.1	0	6245	0	0	6462.6	0	0
	0.242279	-0.076608	+	3.78172	-1.48988	+	3.63764	-1.41328	Q5TCZ1	1043	Q5TCZ1	Q5TCZ1	SH3 and PX domain-containing protein 2A	SH3PXD2A	S						AKGRLAERAASQGSDSPLLPAQRNSIPVSPV	17.0024	16.7814	16.7189	15.3696	15.4454	15.2181	16.9278	16.7256	16.6196	2			0.997738	3.95e-30	275.19	238.04	275.19	-0.98087	146530000	1043	795342	0	105220	0	0	82104	0	0
	1.17538	-0.0645924	+	3.27173	-0.439889	+	2.89644	-0.375296	Q86VQ1	105	Q86VQ1	Q86VQ1	Glucocorticoid-induced transcript 1 protein	GLCCI1	S						ASLGSLPGPGAARGPSPSSPTPPAAAAPAEQ	17.3741	17.3254	17.3447	16.9691	16.9253	16.83	17.2966	17.3125	17.2412	2			0.999701	1.64e-12	159.95	134.63	159.95	-0.63009	304870000	105	1350390	1398.6	0	135490	0	0	118490	0
	1.19991	-0.221511	+	2.38395	0.323843	+	2.84631	0.545354	O14686	2240	O14686	O14686	Histone-lysine N-methyltransferase 2D	KMT2D	T						EFHTTPPGTPRHQPSTPDPFLKPRCPSLDNL	17.361	17.2037	17.1977	17.5866	17.594	17.5532	16.9184	17.0247	17.1548	4			0.988826	0.00156613	103.61	83.513	103.61	-0.035553	201430000	2240	1485670	3628	134280	0	0	109150	0	0
	0.0727816	-0.00685565	+	3.27637	-0.335763	+	2.9913	-0.328908	Q9UPN4	105	Q9UPN4	Q9UPN4	Centrosomal protein of 131 kDa	CEP131	S						PRPTEPTDFLMLFEGSPSGKKRPASLSTAPS	16.9365	16.8724	16.894	16.5111	16.5883	16.5962	16.8451	16.8985	16.9387	3			0.991088	4.54e-07	109.09	66.285	98.883	-0.11497	197480000	105	1032200	3259.8	0	100610	0	0	87302	0
	1.22311	-0.329848	+	2.29369	0.605357	+	3.44365	0.935205	O14686	2274	O14686	O14686	Histone-lysine N-methyltransferase 2D	KMT2D	S				yes		ESPGVGGGKASEPLLSPPPFGESRKALEVKK	16.0717	15.8145	15.7322	16.4151	16.5426	16.4768	15.4715	15.4648	15.6926	2			1	2.88e-18	227.63	195.47	227.63	-0.46872	300900000	2274	609826	0	55869	0	0	42780	0	0
	0.186946	-0.0719337	+	2.43505	0.865838	+	4.54978	0.937772	O14686	2332	O14686	O14686	Histone-lysine N-methyltransferase 2D	KMT2D	T						GGLELKTPDVFKAPLTPRASQVEPQSPGLGL	18.0905	17.9027	17.6054	18.7129	18.7193	18.7639	17.8043	17.7191	17.8593	3			1	0.00520473	83.106	58.814	83.106	-0.059466	96758000	2332	2801840	0	220550	0	0	174880	0	0
	1.34795	-0.606831	+	2.79934	1.53195	+	5.08753	2.13878	O14974	507	O14974	O14974	Protein phosphatase 1 regulatory subunit 12A	PPP1R12A	S			yes			TRLAYVAPTIPRRLASTSDIEEKENRDSSSL	21.6272	21.0222	21.0378	22.7217	22.7498	22.8115	20.6008	20.5162	20.7497	3			0.990327	1.97e-29	273.79	229.22	236.66	-0.22052	4478100000	507	35866800	3803.8	2444400	0	0	1433100	0	0
	0.800497	0.149911	+	2.25015	-0.475739	+	4.52249	-0.625649	Q14004	1058	Q14004	Q14004	Cyclin-dependent kinase 13	CDK13	T						PRKDLSLGLDDSRTNTPQGVLPSSQLKSQGS	18.8679	18.928	18.6495	18.3774	18.2966	18.3441	18.9551	19.0004	18.9395	4			0.977104	4.06e-34	233.72	198.07	233.72	-0.86663	220640000	1058	3950870	14904	374200	0	0	349120	0	0
	0.0503753	0.00802358	+	2.35839	-0.54086	+	2.30334	-0.548883	Q8IVL1	1059	Q8IVL1	Q8IVL1	Neuron navigator 2	NAV2	S						KSTSGKKNPVISQTGSWRRGMTAQVGITMPR	17.3466	17.4477	17.3557	16.7231	17.0127	16.7916	17.3766	17.3234	17.4741	3			0.976978	0.000760975	99.273	83.454	99.273	0.17114	123750000	1059	1387700	4532	132980	0	0	128680	0	0
	0.0272571	0.015556	+	2.69112	1.4673	+	2.93514	1.45174	O14980	1055	O14980	O14980	Exportin-1	XPO1	S			yes			IALRQADEEKHKRQMSVPGIFNPHEIPEEMC	13.3145	12.8846	13.3792	14.3907	14.8008	14.7887	12.9903	13.3634	13.2712	2			1	0.0333314	51.495	41.915	51.495	1.3432	27420000	1055	141381	0	8566.1	0	0	5932.1	0	0
	0.338632	0.142024	+	2.98498	1.34759	+	2.44327	1.20557	O15013	379	O15013	O15013	Rho guanine nucleotide exchange factor 10	ARHGEF10	S						TRAAVKRGRSFIRTKSLIAQDHRSSLEEEQN	17.2695	17.5188	17.5566	19.0452	18.7334	18.609	17.6423	17.8168	17.3118	3			0.959673	0.00390905	96.673	72.962	96.673	0.30128	163490000	379	2628970	2183.8	126190	0	0	134990	0	0
	0.0271469	-0.00843493	+	2.93021	-0.56341	+	2.05248	-0.554976	Q99741	106	Q99741	Q99741	Cell division control protein 6 homolog	CDC6	S						LKGRRLVFDNQLTIKSPSKRELAKVHQNKIL	17.3796	17.3367	17.4447	16.7126	16.9213	16.8369	17.1825	17.5052	17.448	3			0.962846	8.45e-07	157.85	131.86	157.85	-0.27117	148450000	106	1379040	0	136000	0	0	119400	0	0
	0.372974	-0.0557073	+	3.05287	-0.516363	+	2.59548	-0.460655	Q15047	1066	Q15047	Q15047	Histone-lysine N-methyltransferase SETDB1	SETDB1	S						MSVVTESSRNYGYNPSPVKPEGLRRPPSKTS	19.7702	19.8848	19.871	19.3125	19.4102	19.2542	19.7912	19.8722	19.6954	3			1	8.13e-11	198.77	175.76	197.1	-0.39694	834550000	1066	7541950	21358	691270	0	0	665540	0	0
	2.30178	-0.367378	+	1.49912	0.259558	+	3.32252	0.626936	O15014	1055	O15014	O15014	Zinc finger protein 609	ZNF609	S						WKQKPSIPPTLTKAPSLTDLVKSGPGKAKEP	17.7899	17.9513	17.7589	17.9901	18.17	18.1187	17.4291	17.4496	17.5193	2			0.999683	0.000112107	190.57	126.53	117.25	0.17832	156330000	1055	2109840	0	179770	0	0	180710	0	0
	0.264682	0.173968	+	1.56823	1.41299	+	1.56301	1.23902	O15014	413	O15014	O15014	Zinc finger protein 609	ZNF609	S						SSKTRAGANSKGRRGSQNSSEHRPPASSTSE	14.5563	14.0919	14.8917	16.1865	15.2457	16.3466	14.9279	14.5233	14.6106	4			0.977882	4.46e-07	114.88	61.096	96.903	-0.62755	73906000	413	369741	623.54	19933	0	0	13389	0	0
	0.11596	-0.0265363	+	1.61377	-0.404764	+	1.42973	-0.378227	Q12888	1068	Q12888	Q12888	Tumor suppressor p53-binding protein 1	TP53BP1	S						PPTTPIRGNLLHFPSSQGEEEKEKLEGDHTI	18.3685	18.5173	18.3675	18.0279	18.1843	17.8268	18.2757	18.5066	18.3913	5			0.831462	6.18e-07	116.34	103.2	116.34	0.14457	122330000	1068	2884930	3152.8	266440	0	0	264690	0	0
	0.744025	-0.0601044	+	2.72025	-0.31904	+	3.26809	-0.258936	Q6SPF0	107	Q6SPF0	Q6SPF0	Atherin	SAMD1	T						SYRNAARVQPPRRGATPPAPPRAPRGAPAAA	16.3748	16.4661	16.3453	16.0666	16.123	16.0395	16.3495	16.3261	16.3303	3			1	0.00864754	78.529	57.065	71.548	0.078803	278040000	107	716821	1629.9	68665	0	0	66380	0	0
	0.0389995	-0.0227477	+	2.21728	-0.502187	+	1.28622	-0.479439	Q6PKG0	1071	Q6PKG0	Q6PKG0	La-related protein 1	LARP1	T						SQSSSRPAAMISQPPTPPTGQPVREDAKWTS	17.1193	17.2385	16.9166	16.5948	16.6057	16.5674	16.7224	17.2061	17.2778	4			0.985585	0.0110613	55.49	46.984	55.49	0.61548	188550000	1071	1136610	6072.3	113930	0	0	111750	0	0
	0.835613	-0.261269	+	1.5776	0.478019	+	2.64879	0.739288	O15027	1786	O15027	O15027	Protein transport protein Sec16A	SEC16A	S				yes		LLPSAPQTLPDGPLASPARVPMFPVPLPPGP	15.6003	15.4169	15.1833	15.7517	15.8917	15.9911	15.2292	14.9784	15.2091	2			0.999942	1.79e-09	158.44	124.85	158.44	0.11224	109800000	1786	427415	0	40546	0	0	32717	0	0
+	3.15819	1.21963	+	3.98589	2.4522	+	3.68317	1.23257	O15084	1011	O15084	O15084	Serine/threonine-protein phosphatase 6 regulatory ankyrin repeat subunit A	ANKRD28	S			yes			TFNAINRYTNTSKTVSFEALPIMRNEPSSYC	14.8912	15.0541	15.3299	17.6585	17.6165	17.3567	16.2871	16.3103	16.3366	2			0.999714	1.04e-12	228.83	189.96	107.97	0.25583	164590000	1011	988829	0	25033	0	0	25616	0	0
+	2.05928	0.621181	+	4.92377	3.08272	+	5.58673	2.46154	O15155	50	O15155	O15155	BET1 homolog	BET1	S						LTESLRSKVTAIKSLSIEIGHEVKTQNKLLA	18.0294	18.3993	18.3398	21.3737	21.3175	21.3255	18.9486	18.7567	18.9268	3			0.995596	1.17e-08	198.48	152.51	198.48	-0.038881	346220000	50	11398300	10107	211580	0	0	244440	0	0
	0.493141	-0.0623391	+	2.34587	-0.322205	+	2.84969	-0.259865	Q86VQ1	108	Q86VQ1	Q86VQ1	Glucocorticoid-induced transcript 1 protein	GLCCI1	S				yes		GSLPGPGAARGPSPSSPTPPAAAAPAEQAPR	17.4917	17.4579	17.3265	17.1285	17.1266	17.0545	17.406	17.3524	17.3308	2			0.952119	6.35e-22	218.11	193.18	159.95	-0.63009	346930000	108	1461030	1841.88	60959	85809	0	55540	74026	0
+	2.03589	-0.516015	+	1.45518	0.751488	+	2.26585	1.2675	O15164	1042	O15164	O15164	Transcription intermediary factor 1-alpha	TRIM24	S						DSDDDFVQPRKKRLKSIEERQLLK_______	17.0642	17.0979	16.8155	17.6284	17.4294	18.1743	16.3613	16.5809	16.4873	3			1	0.00713876	101.39	18.977	101.39	0.43277	76746000	1042	1389850	0	109740	0	0	101640	0	0
	0.916543	0.173245	+	3.00145	0.836666	+	2.62172	0.663421	O15231	465	O15231	O15231	Zinc finger protein 185	ZNF185	S						RQSSPSGSEQLVRRESCGSSVLTDFEGKDVA	16.3034	16.4287	16.519	17.1911	17.1683	17.4017	16.6022	16.4768	16.6917	4			0.999875	3.98e-10	164.98	148.26	164.98	-0.64435	72060000	465	1070930	569.41	65409	0	0	64726	0	0
	0.119429	0.0520388	+	1.90335	0.580736	+	2.25342	0.528697	O15294	20	O15294	O15294	UDP-N-acetylglucosamine--peptide N-acetylglucosaminyltransferase 110 kDa subunit	OGT	S			yes			VGNVADSTEPTKRMLSFQGLAELAHREYQAG	14.015	13.8116	14.2615	14.6581	14.5433	14.6289	14.0399	13.9486	14.2558	3			1	0.00559469	78.078	50.415	78.078	-0.54542	25393000	20	183366	1093.2	13794	0	0	11083	0	0
	0.809026	0.167361	+	1.74663	-0.462867	+	2.00151	-0.630229	Q9UMZ2	1087	Q9UMZ2	Q9UMZ2	Synergin gamma	SYNRG	S						RSLSLGDKEISRSSPSPALEQPFRDRSNTLN	14.276	14.1366	14.2882	13.8223	13.5613	13.9286	14.5605	14.2853	14.3571	3			0.881228	0.00467434	77.191	50.162	77.191	-1.1682	44135000	1087	166394	0	16474	0	0	13799	0	0
	0.653156	-0.252873	+	1.41507	0.275356	+	1.40645	0.528228	O15446	136	O15446	O15446	DNA-directed RNA polymerase I subunit RPA34	CD3EAP	S						PQQSLSGSPLQPIPASPPPQIPPGLRPRFCA	13.0589	13.1538	12.932	13.2595	13.2599	13.4514	12.8608	12.4862	13.0391	3			0.998516	0.0250631	43.831	37.468	43.831	0.17351	31909000	136	78617.2	0	0	7199.2	0	0	7112.9	0
	1.72639	-0.105677	+	3.50167	-0.755258	+	3.38853	-0.649581	Q7Z460	1091	Q7Z460	Q7Z460	CLIP-associating protein 1	CLASP1	S				yes		LLHNHLKNSSNTSVGSPSNTIGRTPSRHTSS	20.2415	20.2302	20.1565	19.5412	19.4805	19.3406	20.1167	20.0909	20.1034	2			0.999934	3.07e-66	352.63	300.68	294.58	0.16509	1889000000	1091	9110400	0	952430	0	0	840080	0	0
	0.238308	0.122311	+	1.27476	0.568655	+	1.57862	0.446344	O43295	858	O43295	O43295	SLIT-ROBO Rho GTPase-activating protein 3	SRGAP3	S						SDYGFGGVMGRVRLRSDGAAIPRRRSGGDTH	12.9549	12.5909	13.2262	13.3103	13.653	13.5147	13.1161	13.1428	12.8801	3			1	0.000846046	119.25	81.285	119.25	0.044717	16901000	858	85949.2	0	6707.5	0	0	4866.2	0	0
	0.147551	0.0277704	+	1.74235	-0.285266	+	2.30303	-0.313036	P00492	11	P00492	P00492	Hypoxanthine-guanine phosphoribosyltransferase	HPRT1	S						_____MATRSPGVVISDDEPGYDLDLFCIPN	13.6596	13.8617	13.7166	13.4171	13.4187	13.5464	13.7614	13.8411	13.7188	3			0.974713	0.000347596	80.239	69.846	80.239	0.63784	77188000	11	117578	0	10833	0	0	11465	0	0
	0.0012346	0.00117906	+	1.77187	0.885195	+	1.08855	0.884016	O43379	49	O43379	O43379	WD repeat-containing protein 62	WDR62	S				yes		PPPAPPICLRRRTRLSTASEETVQNRVSLEK	15.0949	15.123	15.0265	16.2308	15.5242	16.145	15.6927	14.8753	14.68	3			0.96222	4.85e-05	137.44	85.551	137.44	-0.25228	120580000	49	424288	0	28752	0	0	26837	0	0
	0.47301	0.163207	+	2.21956	0.805174	+	2.18381	0.641967	O43399	161	O43399	O43399	Tumor protein D54	TPD52L2	S						TVGSAISRKLGDMRNSATFKSFEDRVGTIKS	18.1304	18.3166	17.8931	18.9068	19.0784	18.7705	18.3009	18.1175	18.4114	3			0.999903	0.000383779	114.54	95.71	114.54	-0.26389	121130000	161	3405720	0	226610	0	0	231190	0	0
	0.292942	0.118683	+	1.35426	0.417856	+	1.65037	0.299173	O43491	87	O43491	O43491	Band 4.1-like protein 2	EPB41L2	S				yes		RGISRFIPPWLKKQKSYTLVVAKDGGDKKEP	19.7934	20.2282	19.8055	20.3929	20.327	20.3608	20.0151	20.2176	19.9505	2			0.999972	9e-05	195.79	97.204	195.79	0.32369	1690600000	87	10654900	0	702280	0	0	838990	0	0
	0.317444	0.0762545	+	2.07038	-0.574233	+	2.87014	-0.650487	Q8WUF5	110	Q8WUF5	Q8WUF5	RelA-associated inhibitor	PPP1R13L	S			yes			TPFGRSESAPTLHPYSPLSPKGRPSSPRTPL	17.0826	17.0241	16.78	16.5366	16.2993	16.3282	17.0281	17.1001	16.9873	3			0.991314	0.0013182	84.208	62.335	84.208	0.43641	70780000	110	1044270	0	111120	0	0	96703	0	0
	0.797676	-0.0959428	+	2.19552	-0.301085	+	2.71956	-0.205142	Q9UPT8	1104	Q9UPT8	Q9UPT8	Zinc finger CCCH domain-containing protein 4	ZC3H4	S						TASSRAAKPGPAEAPSPTASPSGDASPPATA	18.612	18.5709	18.4367	18.2326	18.2806	18.203	18.4215	18.4331	18.4771	3			0.957803	6.77e-13	143.88	132.03	143.88	-0.18328	1396900000	1104	3152600	3057.4	149670	0	164770	129730	0	144680
	0.43348	0.0633316	+	1.59472	-0.333028	+	2.23205	-0.396359	P55196	1107	P55196	P55196	Afadin	MLLT4	S				yes		QGAIYHGLATLLNQPSPMMQRISDRRGSGKP	17.7691	17.7527	17.9455	17.4036	17.6352	17.4294	17.8906	17.9008	17.866	3			0.999996	2.57e-10	148.87	132.56	148.87	0.14491	280070000	1107	1999480	4596.9	177250	0	0	158060	0	0
	0.563434	0.232771	+	1.34853	0.555015	+	1.72862	0.322244	O43598	12	O43598	O43598	2'-deoxynucleoside 5'-phosphate N-hydrolase 1	DNPH1	S						____MAAAMVPGRSESWERGEPGRPALYFCG	15.5354	14.9334	15.1148	15.6419	15.7195	15.8872	15.3694	15.4009	15.5115	4			0.982418	9.22e-10	132.93	109.25	132.93	0.40135	285300000	12	423820	0	38796	0	0	23614	0	0
	0.591308	0.224197	+	1.94914	-1.00386	+	2.82785	-1.22806	Q6ZSZ5	1111	Q6ZSZ5	Q6ZSZ5	Rho guanine nucleotide exchange factor 18	ARHGEF18	S						SRNRRSLSPILPGRHSPAPPPDPGFPAPSPP	15.9227	15.3507	15.6297	14.7724	14.7957	14.3235	15.8922	15.9005	15.783	4			0.930386	0.00155297	69.062	54.131	69.062	0.39502	61427000	1111	408822	0	0	50485	0	0	31289	0
	0.106213	0.0642462	+	3.26064	1.43821	+	2.90668	1.37396	O43719	387	O43719	O43719	HIV Tat-specific factor 1	HTATSF1	S						FLNAPEANRGLRRSDSVSASERAGPSRARHF	12.0669	12.3118	11.8248	13.557	13.474	13.4871	12.3112	12.2863	11.7987	2			0.920434	0.0489171	58.674	19.652	58.674	1.0407	16072000	387	63539.6	0	3666.9	0	0	4031.5	0	0
	0.375761	0.0483596	+	3.0482	-0.559654	+	3.88426	-0.608013	Q5T1M5	1114	Q5T1M5	Q5T1M5	FK506-binding protein 15	FKBP15	S			yes			TSDPEEGDPLALGPESPGEPQPPQLKKDDVT	17.2807	17.3723	17.1965	16.7746	16.7457	16.6502	17.2966	17.3388	17.3592	3			1	4.11e-08	111.58	94.501	111.58	0.89549	180190000	1114	1298560	1308.5	109780	17363	0	104290	18002	0
	0.928154	-0.179169	+	2.24816	0.628461	+	2.6531	0.80763	O43765	305	O43765	O43765	Small glutamine-rich tetratricopeptide repeat-containing protein alpha	SGTA	S				yes		ELIEQLRSQIRSRTPSASNDDQQE_______	16.2126	16.3659	16.1502	16.765	16.7843	17.0647	16.1347	15.937	16.1194	2			0.873282	1.15e-09	213.77	205	213.77	0.35247	56464000	305	822103	0	44882	16608	0	45896	16146	0
	0.561624	-0.0965405	+	1.82546	-0.31882	+	2.26819	-0.222279	Q9NVM6	112	Q9NVM6	Q9NVM6	DnaJ homolog subfamily C member 17	DNAJC17	S						KLDLEARERQAQAQESEEEEESRSTRTLEQE	18.0796	18.018	17.8408	17.7221	17.6277	17.6321	17.8439	17.9333	17.8716	3			1	4.49e-48	327.55	297.89	222.72	0.16441	1056600000	112	2127580	2280.8	218910	0	0	189020	0	0
	0.134587	0.0274436	+	2.10414	-0.343047	+	1.85002	-0.37049	O95425	1120	O95425	O95425	Supervillin	SVIL	S						AAGEIKTPTGEGLLDSPSKTMSIKERLALLK	15.3612	15.4853	15.4233	15.1597	15.1176	14.9634	15.3958	15.5823	15.3741	2			0.980601	0.00258123	86.498	65.247	86.498	1.1191	45222000	1120	371304	0	34461	0	0	34261	0	0
	0.590028	0.1416	+	1.67483	0.397081	+	3.11118	0.255481	O43900	437	O43900	O43900	Prickle-like protein 3	PRICKLE3	S						PEEPSRFLRGAPHRHSMPELGLRSVPEPPPE	17.454	17.1294	17.1451	17.6559	17.5978	17.6659	17.4199	17.3707	17.3626	4			1	1.86e-09	188.98	154.98	188.98	0.021074	190340000	437	1640600	7484.9	143050	0	0	103820	0	0
	0.529541	0.217379	+	1.95001	0.865714	+	2.65437	0.648335	O43933	1181	O43933	O43933	Peroxisome biogenesis factor 1	PEX1	S						GKDQLFSQPPVLRTASQEGCQELTQEQRDQL	13.8895	13.3941	13.9488	14.6782	14.7065	14.4448	13.9926	14.0132	13.8786	2			0.996398	7.06e-05	120.63	97.71	120.63	0.3072	56082000	1181	169568	0	12665	0	0	8364	0	0
	1.0809	-0.124044	+	2.91257	-0.449714	+	2.99098	-0.32567	Q12774	1126	Q12774	Q12774	Rho guanine nucleotide exchange factor 5	ARHGEF5	S				yes		SQQRLESLSETPGPSSPRQPRKALVSSESYL	19.3979	19.4273	19.2727	18.9306	18.956	18.8622	19.2692	19.2661	19.1905	2			0.999838	3.95e-60	354.7	307.82	354.7	0.85141	776310000	1126	5370620	5305.6	536630	0	0	488920	0	0
+	1.8463	-0.534482	+	1.89776	0.803106	+	2.71655	1.33759	O60293	352	O60293	O60293	Zinc finger C3H1 domain-containing protein	ZFC3H1	S						SQGLQDKEQNLTRRISTSDILSEKKLGEDEE	18.6661	18.3786	18.3938	19.0922	19.1513	19.6044	17.7736	17.9918	18.0697	3			0.986205	5.78e-11	223.52	160.7	223.52	0.4096	165220000	352	3957820	6080.3	326220	0	0	241060	0	0
	0.129	0.0450516	+	2.38978	-0.808969	+	3.10274	-0.85402	Q6UUV9	113	Q6UUV9	Q6UUV9	CREB-regulated transcription coactivator 1	CRTC1	S						HGLVDRVYRERGRLGSPHRRPLSVDKHGRQA	18.4568	18.2757	18.0593	17.3196	17.4714	17.574	18.2717	18.2347	18.4207	4			1	0.000862079	99.392	67.325	99.392	0.44547	226470000	113	2468610	12787	282960	0	0	224900	0	0
	0.619456	0.154226	+	3.808	1.57257	+	4.89749	1.41834	O60658;O95263	386;446	O60658;O95263	O95263	High affinity cAMP-specific and IBMX-insensitive 3',5'-cyclic phosphodiesterase 8A;High affinity cAMP-specific and IBMX-insensitive 3',5'-cyclic phosphodiesterase 8B	PDE8A;PDE8B	S						EVSSQRRHSSMARIHSMTIEAPITKVINIIN;PSLQNRRYPSMARIHSMTIEAPITKVINIIN	16.8936	16.5277	16.7301	18.365	18.2762	18.2279	16.8386	16.944	16.8314	3			0.941404	0.000105138	135.02	116.4	135.02	-0.4178	44792000	446	1733720	44.907	97715	0	0	69195	0	0
	0.252571	0.0551484	+	2.86421	0.603333	+	2.1876	0.548185	O60664	241	O60664	O60664	Perilipin-3	PLIN3	S				yes		VQQQRQEQSYFVRLGSLSERLRQHAYEHSLG	14.3372	14.3727	14.2603	14.8928	15.0586	14.8289	14.4525	14.4645	14.2186	2			0.993589	0.036375	76.679	15.769	76.679	0.12483	26755000	241	223649	0	17173	0	0	16181	0	0
+	1.67131	-0.627384	+	3.26751	1.78933	+	4.99556	2.41671	O60716	320	O60716	O60716	Catenin delta-1	CTNND1	S						ARRTGTPSDPRRRLRSYEDMIGEEVPSDQYY	17.2203	16.7109	16.7571	18.6754	18.5694	18.8115	16.1953	16.3692	16.2417	4			0.999994	1.9e-42	248.98	221.23	248.98	-0.62751	458500000	320	1990090	0	122030	0	0	78291	0	0
+	1.86568	0.798378	+	2.0173	1.56482	+	1.04332	0.766438	O60716	864	O60716	O60716	Catenin delta-1	CTNND1	S						FQVNLNNASRSQSSHSYDDSTLPLIDRNQKS	13.2838	13.2281	13.6192	15.3512	14.327	15.1474	14.4605	13.9845	14.0811	3			0.997697	1.07e-07	167.88	149.17	167.88	0.11193	33749000	864	196983	0	8389.1	0	0	7478.5	0	0
	0.956611	-0.170615	+	1.24439	0.658924	+	1.60096	0.829539	O60784	160	O60784	O60784	Target of Myb protein 1	TOM1	S						RRKGLEFPMTDLDMLSPIHTPQRTVFNSETQ	14.484	14.2869	14.2226	14.7392	14.7696	15.4615	14.1911	14.1046	14.186	3			0.999964	4.29e-07	130.16	105.52	130.16	0.32966	30270000	160	224402	0	18977	0	0	15271	0	0
	0.162099	0.0319862	+	1.68466	-0.332969	+	2.27247	-0.364955	P48634	1147	P48634	P48634	Protein PRRC2A	PRRC2A	S						LTQVPLAPPPPGAPPSPAPARFTARGGRVFT	18.1482	17.9347	17.9578	17.6041	17.6409	17.7967	18.0493	18.0962	17.9911	2			1	1.71e-17	186.35	167.51	186.35	0.31938	380000000	1147	2257930	448.32	229360	0	0	178690	0	0
	0.0108093	0.00475629	+	2.82098	0.667395	+	2.07775	0.662639	O60885	1126	O60885	O60885	Bromodomain-containing protein 4	BRD4	S						KEEKIHSPIIRSEPFSPSLRPEPPKHPESIK	18.3629	18.3886	18.1668	18.8899	18.9661	19.0644	18.33	18.0818	18.5207	4			0.812917	0.000114582	94.721	73.52	94.721	0.24074	281780000	1126	3618490	0	265440	0	0	242680	0	0
	0.0120425	-0.00324567	+	2.15255	0.484049	+	3.22485	0.487295	O60934	397	O60934	O60934	Nibrin	NBN	S						KEIKVSKMEQKFRMLSQDAPTVKESCKTSSN	18.1389	18.109	17.8696	18.5244	18.5959	18.4494	18.0322	18.0821	17.9934	2			0.999999	1.46e-05	191.53	140.18	99.5	-1.1289	163940000	397	2808190	0	227930	0	0	200980	0	0
	0.300702	0.042579	+	1.8456	-0.348969	+	2.41155	-0.391548	Q8N9B5	115	Q8N9B5	Q8N9B5	Junction-mediating and -regulatory protein	JMY	S				yes		RSPGPRRSSAWAEGGSPRSTRSLLGDPRLRS	17.5516	17.4028	17.3725	17.2183	17.0485	17.0132	17.5157	17.4748	17.4642	2			1	0.00218436	104.81	79.952	104.81	0.15959	227910000	115	1515150	3424.8	152880	0	0	124840	0	0
	0.458056	0.102658	+	2.3421	-0.62137	+	3.27664	-0.724028	P28290	1156	P28290	P28290	Sperm-specific antigen 2	SSFA2	T						PLVARKKVFRASVALTPTAPSRTGSVQTPPD	17.8521	17.9724	17.6652	17.1162	17.1858	17.3236	17.9003	18.0063	17.8911	2			0.991519	2.22e-05	154.86	118.19	150.22	-0.31856	193050000	1156	1908840	159.77	187530	0	0	183290	0	0
	0.362683	-0.180866	+	3.26295	-0.88902	+	1.69465	-0.708155	Q8TEU7	1157	Q8TEU7	Q8TEU7	Rap guanine nucleotide exchange factor 6	RAPGEF6	S						TKNLSEKRSAKSSEMSPVPMRSAGQTTKAHL	17.7949	17.71	17.5019	16.7586	16.8074	16.7737	17.2779	17.8653	17.321	2			0.899317	0.0244876	72.096	49.948	72.096	-1.4758	127770000	1157	1515050	10313	180380	0	0	153580	0	0
	2.38755	-0.359498	+	4.70438	1.5688	+	4.69265	1.9283	O75061	566	O75061	O75061	Putative tyrosine-protein phosphatase auxilin	DNAJC6	S						SGPASTQSTPRRSATSTSASPTLRVGEGATF	13.7079	13.7952	13.7387	15.3033	15.2157	15.4292	13.4959	13.3525	13.3148	2			0.867375	0.00070722	111.79	81.986	111.79	0.95962	28507000	566	204823	0	11194	0	0	10962	0	0
	0.304124	-0.0606569	+	1.62752	-0.426361	+	1.48356	-0.365704	Q9UDY2	1159	Q9UDY2	Q9UDY2	Tight junction protein ZO-2	TJP2	S						KAPSRPYQDTRGSYGSDAEEEEYRQQLSEHS	21.5439	21.6296	21.4136	21.075	21.2915	20.9415	21.3727	21.4836	21.5489	2			1	2.17e-73	375.03	298.73	375.03	0.32005	1320900000	1159	24730000	128480	2309800	0	0	2158500	0	0
	1.90116	0.41146	+	4.35707	1.34271	+	3.51511	0.93125	O75113	300	O75113	O75113	NEDD4-binding protein 1	N4BP1	S						RRFSDSEERHTKKQFSLENVQEGEILHDAKT	17.2855	17.4416	17.4915	18.6849	18.7929	18.7689	17.69	17.8216	17.9413	4			1	5.77e-24	230.12	196.93	230.12	0.00088335	176710000	300	2686710	9149.4	127560	0	0	128150	0	0
	0.126835	-0.0668914	+	1.33935	-0.587772	+	2.70446	-0.520881	P55081	116	P55081	P55081	Microfibrillar-associated protein 1	MFAP1	S						LARHRKIVEPEVVGESDSEVEGDAWRMERED	19.7928	20.2946	19.6625	19.2492	19.2674	19.47	19.8405	19.8794	19.8293	3			1	1.57e-46	273.96	254.71	96.44	2.5168	1688200000	116	7792390	7339.7	555280	146700	0	745940	131490	0
	1.8123	-0.27373	+	4.48544	1.62515	+	4.86833	1.89888	O75128	962	O75128	O75128	Protein cordon-bleu	COBL	S						GAPPRGEVIGPHRKLSTQDRPAAIHRSSCFS	15.521	15.5198	15.6752	17.1099	17.1705	17.3111	15.2386	15.383	15.2732	4			0.979451	0.000104162	135.09	100.79	135.09	0.38547	83484000	962	758034	0	38417	0	0	35069	0	0
	0.350945	0.0888926	+	2.26411	0.506709	+	1.46808	0.417817	O75170	771	O75170	O75170	Serine/threonine-protein phosphatase 6 regulatory subunit 2	PPP6R2	S						DFQPFCCSESGPRCSSPVDTECSHAEGSRSQ	16.8391	16.736	16.8327	17.1739	17.4702	17.2838	16.6926	17.0051	16.9768	3			0.861031	6.48e-22	239.93	223.22	239.93	-0.03913	190600000	771	1229720	0	94159	0	0	79631	0	0
	0.103245	0.0451202	+	3.23137	1.6433	+	4.94529	1.59818	O75396	137	O75396	O75396	Vesicle-trafficking protein SEC22b	SEC22B	S				yes		TKKLYIDSCARRNLGSINTELQDVQRIMVAN	14.4688	14.1626	14.7022	16.018	16.2	16.0455	14.4817	14.5238	14.4635	2			0.99996	3.36e-05	148.03	112.82	123.03	-0.58096	81309000	137	362938	0	18783	0	0	14043	0	0
	1.61773	0.271178	+	3.32366	-0.976904	+	4.33395	-1.24808	Q5SW79;Q00G26	1162;205	Q5SW79	Q5SW79	Centrosomal protein of 170 kDa;Perilipin-5	CEP170;PLIN5	S						IDLLAQPRRTRLGSLSARSDSEATISRSSAS	17.3014	17.0536	17.1876	16.2959	16.2252	16.0908	17.5028	17.4449	17.4085	2			0.815994	9.6e-05	130.39	81.083	130.39	0.06911	236350000	1162	1214020	0	128950	0	0	98647	0	0
	0.489661	-0.058047	+	2.16417	-0.252432	+	3.1684	-0.194385	P42694	1163	P42694	P42694	Probable helicase with zinc finger domain	HELZ	T						QPNPSVLIGNPIRAYTPPPPLGPHPNLGKSP	19.2291	19.3873	19.2606	19.0585	19.0301	19.031	19.1991	19.2596	19.2441	3			0.999974	1.6e-06	159.26	137.72	159.26	-0.28299	239760000	1163	5442700	13563	478400	0	0	475880	0	0
	0.273605	-0.10122	+	1.80726	0.636574	+	3.08405	0.737795	O75398	432	O75398	O75398	Deformed epidermal autoregulatory factor 1 homolog	DEAF1	T			yes			KIVLTSLPALAVPPPTPTKAAPPALVNGLEL	14.9207	14.5383	14.4627	15.277	15.1583	15.3962	14.6034	14.4555	14.5593	2			0.826884	7.11e-10	119.46	101.59	119.46	0.28692	0	432	274318	0	25540	0	0	18092	0	0
	0.0855997	0.0198263	+	3.16945	-0.850618	+	4.01612	-0.870445	Q13136	1172	Q13136	Q13136	Liprin-alpha-1	PPFIA1	S						AETLPANFRVTSSMSSPSMQPKKMQMDGNVS	17.3866	17.2539	17.1224	16.4933	16.3798	16.3381	17.2293	17.261	17.3323	2			0.944977	0.000326902	128.08	108.29	128.08	0.31342	79588000	1172	1199300	1748.5	136650	0	0	112920	0	0
	0.0354113	0.00750033	+	2.53765	0.583848	+	3.05584	0.576347	O75420	157	O75420	O75420	PERQ amino acid-rich with GYF domain-containing protein 1	GIGYF1	S						DGAFGRSPREIQRSQSWDDRGERRFEKSARR	17.8192	17.6574	17.8833	18.4266	18.2511	18.4337	17.7575	17.8418	17.7831	2			0.998263	0.00302175	130.56	91.782	130.56	-0.24002	119580000	157	2459250	3209.2	183380	0	0	148220	0	0
	0.550736	-0.212605	+	2.2069	0.860058	+	2.72188	1.07266	O75420	24	O75420	O75420	PERQ amino acid-rich with GYF domain-containing protein 1	GIGYF1	S						GPEWLRALSGGGSVASPPPSPAMPKYKLADY	14.7439	14.2992	14.4503	15.2562	15.2638	15.5536	14.1944	14.1565	14.5046	2			0.997108	0.00128896	95.767	62.069	95.767	-0.58027	40644000	24	264725	0	0	22646	0	0	15398	0
	0.27551	0.0272649	+	1.56725	-0.256294	+	1.84363	-0.283559	Q9HBL0	1177	Q9HBL0	Q9HBL0	Tensin-1	TNS1	S			yes			ARAQFSVAGVHTVPGSPQARHRTVGTNTPPS	19.7543	19.7246	19.6354	19.4199	19.3509	19.5747	19.7443	19.6977	19.7542	3			0.986665	1.64e-05	112.38	85.629	97.124	0.25253	333470000	1177	7424360	9714.9	683850	0	0	597410	0	0
	0.550736	-0.212605	+	2.2069	0.860058	+	2.72188	1.07266	O75420	28	O75420	O75420	PERQ amino acid-rich with GYF domain-containing protein 1	GIGYF1	S						LRALSGGGSVASPPPSPAMPKYKLADYRYGR	14.7439	14.2992	14.4503	15.2562	15.2638	15.5536	14.1944	14.1565	14.5046	2			0.999951	0.00128896	95.767	62.069	95.767	-0.58027	40644000	28	264725	0	0	22646	0	0	15398	0
	0.947067	-0.319145	+	2.90996	1.39108	+	4.38964	1.71022	O75420	638	O75420	O75420	PERQ amino acid-rich with GYF domain-containing protein 1	GIGYF1	S				yes		RGGDQNLLPTMSRSLSVPDSGRLWDVHTSAS	17.0706	17.4773	16.9839	18.7176	18.5283	18.4592	16.7818	16.9249	16.8677	2			0.999995	2.79e-09	234.99	190.01	234.99	-0.13937	150020000	638	2053350	0	110220	0	0	131270	0	0
	1.1497	-0.246664	+	2.35556	-0.628072	+	1.76843	-0.381408	Q8IZ21	118	Q8IZ21	Q8IZ21	Phosphatase and actin regulator 4	PHACTR4	S			yes	yes		LKNGHTTPIGNARSSSPVQVEEEPVRLASLR	18.8496	18.8575	18.6162	18.2817	18.0267	18.1308	18.6341	18.5319	18.4174	2			0.995664	1.21e-31	294.06	262.61	294.06	-0.84499	929000000	118	3322100	0	369610	0	0	332950	0	0
	1.35808	-0.142358	+	3.01478	-0.615307	+	3.10379	-0.47295	Q9H3Q1	118	Q9H3Q1	Q9H3Q1	Cdc42 effector protein 4	CDC42EP4	S						LGSLRDSALFVKNAMSLPQLNEKEAAEKGTS	19.721	19.5711	19.5786	18.9839	19.1069	18.934	19.4847	19.4717	19.4873	3			1	4.02e-07	176.4	116.24	90.498	0.63615	640940000	118	6179330	1043.6	668500	0	0	538700	0	0
	1.58807	-0.255351	+	3.22254	1.16214	+	3.67113	1.4175	O75448	862	O75448	O75448	Mediator of RNA polymerase II transcription subunit 24	MED24	S						FPLDDVQPSKLMRLLSSNEDDANILSSPTDR	16.3402	16.3026	16.4982	17.3951	17.7378	17.4946	16.0476	16.1963	16.131	2			0.977308	3.18e-17	203.81	174.83	203.81	0.36298	182040000	862	1087840	431.43	67067	0	0	59452	0	0
	1.49485	-0.310195	+	2.41921	0.36101	+	2.87151	0.671205	O75569	18	O75569	O75569	Interferon-inducible double-stranded RNA-dependent protein kinase activator A	PRKRA	S				yes		QSRHRAEAPPLEREDSGTFSLGKMITAKPGK	21.3175	21.416	21.231	21.696	21.7209	21.6306	20.8545	21.1157	21.0636	2			0.99977	2.14e-24	232.93	194.18	110.08	-0.86446	3958600000	18	24860900	55573	1980000	0	0	1868900	0	0
	0.781423	0.363102	+	1.76098	0.775877	+	1.43726	0.412774	O75808	296	O75808	O75808	Calpain-15	CAPN15	S						AGASRLAELLSGKRLSVLEEEATEGGTSRVE	13.4004	12.8621	12.8382	13.6953	13.9505	13.7825	13.1779	13.5341	13.4779	3			1	1.85e-08	177.03	152.65	177.03	0.14793	21950000	296	103816	0	9081.4	0	0	5842.5	0	0
	0.0738247	-0.031586	+	1.32135	0.402837	+	3.06906	0.434423	O75815	370	O75815	O75815	Breast cancer anti-estrogen resistance protein 3	BCAR3	S						VDTSPCPNSPVFRTGSEPALSPAVVRRVSSD	14.1727	13.7526	14.1867	14.4275	14.435	14.458	13.9113	14.0624	14.0435	2			0.978831	0.000264627	117.03	52.591	117.03	0.17697	21465000	370	170171	0	15356	0	0	10651	0	0
	0.110506	0.0296968	+	1.50212	-0.294759	+	1.51447	-0.324456	Q9UIF9	1184	Q9UIF9	Q9UIF9	Bromodomain adjacent to zinc finger domain protein 2A	BAZ2A	S						FSMKMELAGSNTTASSPARARGRPRKTKPGS	16.4777	16.3113	16.2729	16.1805	15.9556	16.0416	16.3029	16.5319	16.3161	2			0.998784	1.31e-14	213.36	180.81	213.36	1.697	80520000	1184	717161	0	73641	0	0	59802	0	0
	0.138667	-0.0163987	+	2.48445	-0.362013	+	2.12139	-0.345614	Q14152	1188	Q14152	Q14152	Eukaryotic translation initiation factor 3 subunit A	EIF3A	S						VKPGGWREKEKAREESWGPPRESRPSEEREW	18.2702	18.22	18.2511	17.979	17.8901	17.7862	18.3131	18.1919	18.1872	4			1	0.000556338	126.83	102.58	77.222	-0.95003	339110000	1188	2603290	8325.8	249230	0	0	216610	0	0
	0.172999	-0.00712585	+	2.32844	-0.254146	+	2.20888	-0.24702	Q9H582	1189	Q9H582	Q9H582	Zinc finger protein 644	ZNF644	S						LLKNKRMGEERNSAISPQKIHNQTARKRFVQ	16.3078	16.2944	16.2934	16.0034	15.9967	16.1331	16.3129	16.2985	16.2628	3			0.966671	0.0443453	42.708	32.223	42.708	-0.14369	117370000	1189	690519	283.38	65605	0	0	59121	0	0
	0.667733	-0.139664	+	2.04493	-0.415482	+	2.68839	-0.275818	O14737	119	O14737	O14737	Programmed cell death protein 5	PDCD5	S						EKTTTVKFNRRKVMDSDEDDDY_________	23.792	23.838	23.5568	23.3124	23.3301	23.2979	23.5215	23.6512	23.5952	3			1	3.09e-08	181.08	164.68	181.08	-0.27456	9455900000	119	111385000	235200	10656000	0	0	9569700	0	0
	0.940513	-0.312057	+	3.52579	0.491574	+	2.21841	0.803631	O75962	2492	O75962	O75962	Triple functional domain protein	TRIO	S						SPLQKGGSFWSSIPASPASRPGSFTFPGDSD	14.6549	14.5535	14.5306	15.0384	15.0812	15.0943	14.5043	14.3101	13.9885	3			0.97107	2.76e-08	111.61	96.215	111.61	0.75868	95882000	2492	240390	0	21317	0	0	18279	0	0
	0.621456	-0.100296	+	1.8676	-0.301346	+	2.70399	-0.201049	Q52LR7	119	Q52LR7	Q52LR7	Enhancer of polycomb homolog 2	EPC2	S						QPFNLDNEQPDYDMDSEDETLLNRLNRKMEI	15.7704	15.7285	15.9541	15.4968	15.5519	15.5003	15.7159	15.7554	15.6808	3			0.957217	3.06e-09	130.03	119.71	130.03	0.33127	68934000	119	478101	0	45520	0	0	40366	0	0
	0.482989	-0.0637608	+	1.9174	-0.257396	+	3.03061	-0.193635	Q8WW12	119	Q8WW12	Q8WW12	PEST proteolytic signal-containing nuclear protein	PCNP	S						PKTLSVAAAFNEDEDSEPEEMPPEAKMRMKN	20.7987	20.8529	20.6641	20.4844	20.5482	20.511	20.6977	20.7322	20.6946	3			1	5.86e-18	194.11	169.98	194.11	0.87784	1089800000	119	15134300	20320	1391400	0	0	1278500	0	0
	0.801442	-0.192294	+	1.86271	-0.475264	+	2.43651	-0.28297	Q96IF1	119	Q96IF1	Q96IF1	LIM domain-containing protein ajuba	AJUBA	S				yes		SLPPDFRLEPTAPALSPRSSFASSSASDASK	17.9875	17.9895	17.667	17.3334	17.4353	17.4495	17.6789	17.6453	17.7429	2			1	1.91e-09	206.74	161.14	206.74	0.55034	265730000	119	1872270	527.2	205630	0	0	185420	0	0
	0.125481	-0.0148214	+	2.47474	-0.366711	+	2.87399	-0.351889	Q13813	1190	Q13813	Q13813	Spectrin alpha chain, non-erythrocytic 1	SPTAN1	S						VYGMMPRDETDSKTASPWKSARLMVHTVATF	20.03	20.0084	19.8974	19.6765	19.6259	19.5332	19.9387	19.9675	19.9852	3			0.998625	0.000366316	115.66	84.833	115.66	-0.0033747	1174900000	1190	8617970	9065.2	824890	0	0	723410	0	0
	1.37798	-0.314682	+	1.56394	0.350034	+	3.11932	0.664716	O76039	407	O76039	O76039	Cyclin-dependent kinase-like 5	CDKL5	S						STSKDLTNNNIPHLLSPKEAKSKTEFDFNID	16.0597	15.8643	15.7453	16.1462	16.2929	16.2803	15.4724	15.5953	15.6576	3			1	0.00058529	101.5	71.738	101.5	-0.039169	20659000	407	570189	1199.4	55421	0	0	44239	0	0
	1.15328	0.30646	+	2.61564	0.905126	+	1.98576	0.598666	O76064	157	O76064	O76064	E3 ubiquitin-protein ligase RNF8	RNF8	S						QMIEKNKELRTKRKFSLDELAGPGAEGPSNL	15.8624	15.5534	15.6856	16.5778	16.4513	16.7877	15.8354	16.1201	16.0653	3			1	0.000201869	87.511	67.643	87.511	-0.1297	61613000	157	685967	0	48460	0	0	35873	0	0
	0.194438	0.0557149	+	1.56653	-0.278883	+	1.47086	-0.334598	O00178	12	O00178	O00178	GTP-binding protein 1	GTPBP1	S						____MATERSRSAMDSPVPASMFAPEPSSPG	14.7434	14.6494	14.8633	14.5748	14.393	14.4517	14.8975	14.8997	14.626	2			0.99029	0.0195184	66.644	53.876	66.644	1.1215	55117000	12	239295	0	0	22638	0	0	19499	0
	0.582281	0.231595	+	2.63896	1.73548	+	2.73281	1.50388	O94763	372	O94763	O94763	Unconventional prefoldin RPB5 interactor 1	URI1	S			yes			KFSEKKEEAKRKRKNSTGSGHSAQELPTIRT	17.709	17.3104	17.8505	19.5335	18.9753	19.5676	17.9984	17.7614	17.8048	3			0.967164	1.03e-42	288.92	263.36	118.32	-0.29533	982710000	372	3624720	1053.6	170150	0	0	117300	0	0
+	1.82529	0.634944	+	3.93032	2.24246	+	3.76509	1.60752	O94804	13	O94804	O94804	Serine/threonine-protein kinase 10	STK10	S				yes		___MAFANFRRILRLSTFEKRKSREYEHVRR	15.2173	14.8076	14.8686	17.2055	17.345	17.0703	15.6921	15.423	15.6832	3			0.98994	0.0223363	65.695	41.403	65.695	-0.048923	49498000	13	744741	0	31248	0	0	21694	0	0
	1.53021	-0.372646	+	2.85457	0.899975	+	4.34386	1.27262	O94804	952	O94804	O94804	Serine/threonine-protein kinase 10	STK10	T						MFFKLSEEAECPNPSTPSKAAKFFPYSSADA	18.7835	18.5172	18.4453	19.4732	19.4011	19.5716	18.1289	18.2135	18.2856	2			0.979454	3.85e-09	182.35	156.23	182.35	-0.2001	787940000	952	4453440	6192.7	353340	0	0	264670	0	0
	0.221449	0.0790466	+	5.56641	2.41396	+	4.0952	2.33492	O94806;Q15139	735;742	O94806	O94806	Serine/threonine-protein kinase D3;Serine/threonine-protein kinase D1	PRKD3;PRKD1	S						DFGFARIIGEKSFRRSVVGTPAYLAPEVLRS	13.4876	13.5153	13.6175	16.0058	15.9996	15.8568	13.6962	13.3593	13.8021	2			0.999999	2.54e-30	281.93	229.04	281.93	-1.3732	169940000	735	280143	0	9636.8	0	0	9076.6	0	0
	0.574348	-0.107901	+	3.00796	1.35165	+	3.26769	1.45955	O94888	280	O94888	O94888	UBX domain-containing protein 7	UBXN7	S				yes		DGLSSSPPKKCARSESLIDASEDSQLEAAIR	13.2841	13.3873	13.1372	14.4411	14.5293	14.8932	13.2208	13.1826	13.0816	2			0.987759	1.12e-09	170.11	130.09	170.11	-0.2711	39690000	280	139755	554.3	8390.6	0	0	8326.1	0	0
	1.47352	0.737163	+	3.17796	2.22936	+	3.25757	1.4922	O95071	327	O95071	O95071	E3 ubiquitin-protein ligase UBR5	UBR5	S						ESVLRLRERRWLDGASFDNERGSTSKEGEPN	14.4174	14.5551	15.0965	17.0467	17.0015	16.7088	15.2345	15.5925	15.4534	2			1	3.72e-06	157.86	127.66	68.034	0.31607	57889000	327	623516	501	18136	0	0	18298	0	0
	0.362755	0.0661348	+	1.6685	-0.350016	+	2.29151	-0.416151	P51610	1205	P51610	P51610	Host cell factor 1;HCF N-terminal chain 1;HCF N-terminal chain 2;HCF N-terminal chain 3;HCF N-terminal chain 4;HCF N-terminal chain 5;HCF N-terminal chain 6;HCF C-terminal chain 1;HCF C-terminal chain 2;HCF C-terminal chain 3;HCF C-terminal chain 4;HCF C-terminal chain 5;HCF C-terminal chain 6	HCFC1	S			yes			GPLLGPSMAREPGGRSPAFVQLAPLSSKVRL	18.0526	17.823	17.8896	17.4427	17.6065	17.666	18.0376	17.9236	18.0025	3			1	9.55e-08	137.43	117.05	137.43	1.4282	182930000	1205	2132130	325.5	214950	0	0	165730	0	0
+	2.24983	0.734653	+	3.5716	1.37764	+	2.42346	0.642988	O95155	105	O95155	O95155	Ubiquitin conjugation factor E4 B	UBE4B	S				yes		SNSLETQSQSLSRSQSMDIDGVSCEKSMSQV	17.8807	18.1714	17.862	19.3711	19.43	19.2459	18.5538	18.8699	18.6944	2			0.999974	8.73e-23	265.73	222.89	250.31	-0.041592	435890000	105	4291210	0	191230	0	0	209620	0	0
	1.57414	-0.351955	+	1.819	0.60912	+	2.88701	0.961075	O95239	801	O95239	O95239	Chromosome-associated kinesin KIF4A	KIF4A	S						ESGENPPPKLRRRTFSLTEVRGQVSESEDSI	18.6169	18.2916	18.3876	18.9335	18.9206	19.2694	18.0223	18.144	18.0739	2			0.999254	1.7e-08	225.68	179.22	207.86	-0.07155	528390000	801	3639690	0	315510	0	0	227310	0	0
	0.371324	0.0751699	+	3.59823	0.541842	+	2.38254	0.466672	O95263	517	O95263	O95263	High affinity cAMP-specific and IBMX-insensitive 3',5'-cyclic phosphodiesterase 8B	PDE8B	S				yes		SDLVGGLMTDGLRRLSGNEYVFTKNVHQSHS	16.6451	16.734	16.7729	17.2307	17.2429	17.304	16.7401	16.6954	16.942	3			0.999974	0.00195848	99.927	73.808	99.927	0.19678	50759000	517	1167470	0	82525	0	0	79526	0	0
	1.1204	-0.0556431	+	2.50373	-0.479883	+	2.34467	-0.42424	Q9H792	1217	Q9H792	Q9H792	Pseudopodium-enriched atypical kinase 1	PEAK1	S			yes			SISYELKGLDIESYDSLERPLRKERPVPSAA	18.5823	18.5561	18.6251	18.1325	18.2199	17.9715	18.5542	18.5132	18.5291	4			1	4.68e-29	263.52	237.37	263.52	0.31252	203030000	1217	3173350	1248.2	308150	0	0	271700	0	0
	0.471024	-0.096419	+	1.43788	0.560469	+	1.76292	0.656888	O95359	1562	O95359	O95359	Transforming acidic coiled-coil-containing protein 2	TACC2	S				yes		SQLERSRQELASGLPSPAATQELPVERAAAF	16.5608	16.3008	16.3529	16.7766	16.8297	17.2897	16.3614	16.3326	16.2313	3			0.995537	3.95e-10	139.81	105.72	139.81	-0.050321	136370000	1562	923016	643.68	77923	0	0	59380	0	0
	0.619395	-0.15761	+	2.20916	-0.589992	+	2.72659	-0.432382	Q9H6S0	1221	Q9H6S0	Q9H6S0	Probable ATP-dependent RNA helicase YTHDC2	YTHDC2	S						EFSDECTTAERVLMKSPSPALHPPQKYKDRG	18.1027	17.7462	17.9875	17.3966	17.279	17.3909	17.7516	17.8778	17.7342	4			0.839657	0.00170026	87.16	68.564	87.16	0.19806	129380000	1221	1942290	1549.1	222390	0	0	157370	0	0
	0.556704	-0.136549	+	2.17371	-0.683948	+	1.99626	-0.547399	Q8WYP5	1222	Q8WYP5	Q8WYP5	Protein ELYS	AHCTF1	S				yes		LRSTPLASPSPSPGRSPQRLKETRISFVEED	16.804	17.1027	16.9913	16.1277	16.2493	16.4691	16.8437	16.9342	16.7104	3			0.999984	9.41e-16	215.32	187.24	215.32	0.10959	165650000	1222	972024	0	91939	0	0	101970	0	0
	0.851679	-0.0453777	+	3.34204	-0.498346	+	3.07994	-0.452968	Q8TEW0	1223	Q8TEW0	Q8TEW0	Partitioning defective 3 homolog	PARD3	S			yes			QEERESSQQAQRQYSSLPRQSRKNASSVSQD	18.4193	18.3986	18.3752	17.9418	17.9477	17.8086	18.3126	18.3593	18.3851	2			0.884793	0.0270138	83.278	46.944	83.278	0.347	176280000	1223	2773760	0	275820	0	0	244320	0	0
	0.218182	-0.0447489	+	4.63937	-0.523417	+	2.44862	-0.478668	Q9BY89	1224	Q9BY89	Q9BY89	Uncharacterized protein KIAA1671	KIAA1671	S				yes		QELSLKVPGEAQERRSPTVEPSTLPRERPVQ	16.7169	16.6986	16.6481	16.1779	16.143	16.1724	16.788	16.6166	16.5247	2			0.996478	0.000668672	121.68	89.182	121.68	-1.029	98418000	1224	847368	2692	86649	0	0	77646	0	0
	0.774724	-0.227545	+	1.45102	0.386493	+	1.85053	0.614038	O95359	2359	O95359	O95359	Transforming acidic coiled-coil-containing protein 2	TACC2	S						DPNFNPFSSTSKMQESPKLPQQSYNFDPDTC	16.7834	16.6744	16.5179	16.8515	17.146	17.1378	16.21	16.5191	16.564	3			0.996897	7.86e-05	87.549	72.15	87.549	-0.75558	211370000	2359	1003130	717	90664	0	0	76389	0	0
	1.02211	0.503036	+	2.58014	1.27363	+	2.35693	0.770593	O95359	473	O95359	O95359	Transforming acidic coiled-coil-containing protein 2	TACC2	S						KEVVDAGLVGLERQVSDLGSKGEHPEGDPGE	13.8317	13.905	13.3018	14.9457	14.9901	14.9236	13.9197	14.3176	14.3103	3			0.994572	1.71e-09	131.19	113.25	131.19	0.47744	44407000	473	198180	0	12177	0	0	11804	0	0
	0.883558	0.152059	+	1.95597	0.459918	+	1.62382	0.307859	O95402	337	O95402	O95402	Mediator of RNA polymerase II transcription subunit 26	MED26	S						STPPVRRLELLPSAESPVCWLEQPESHQRLA	16.3322	16.3321	16.1255	16.6431	16.8759	16.6505	16.4771	16.4311	16.3377	4			0.982846	3.97e-10	134.15	119.1	134.15	0.63817	58349000	337	842050	0	66704	0	0	60646	0	0
	0.207264	-0.0881996	+	2.04643	-0.685448	+	2.61544	-0.597248	Q9Y4H2	1237	Q9Y4H2	Q9Y4H2	Insulin receptor substrate 2	IRS2	S						PGQPGGLVGCPGSGGSPMRRETSAGFQNGLN	18.2023	17.7718	17.7816	17.1864	17.234	17.279	17.7201	17.777	17.994	4			0.846883	1.38e-59	260.97	226.06	260.97	0.34522	187430000	1237	1906060	2037.2	237960	0	0	160110	0	0
	0.102755	-0.0158577	+	2.05067	-0.263234	+	3.5174	-0.247376	Q8WXG6	1239	Q8WXG6	Q8WXG6	MAP kinase-activating death domain protein	MADD	S				yes		GGEGSVHLASSRGTLSDSEIETNSATSTIFG	18.1779	18.0101	18.1611	17.8803	17.8485	17.8306	18.1097	18.1212	18.0706	2			0.960785	1.99e-24	228.24	208.14	129.32	0.4842	195660000	1239	2432180	5063.2	234060	0	0	188020	0	0
+	4.34513	1.03787	+	4.72643	1.93698	+	3.26603	0.899113	O95425	968	O95425	O95425	Supervillin	SVIL	S				yes		KRALTGRDSGMEKYGSFEEAEASYPILNRAR	14.9419	15.0352	14.9535	16.8222	16.8542	17.0652	15.9384	16.0084	16.0975	2			1	1.75e-17	218.12	196.38	196.95	0.67079	349520000	968	712441	440.41	25911	0	0	25293	0	0
	0.154382	-0.0155659	+	2.12092	-0.277806	+	1.8173	-0.26224	Q13459	1242	Q13459	Q13459	Unconventional myosin-IXb	MYO9B	S						VGKVSEETEKTLPSGSPRPGQLERPTSLALD	17.909	17.8735	17.9184	17.687	17.6653	17.5152	17.9467	17.8251	17.8823	4			0.784842	3.66e-07	111.15	88.014	85.814	0.37553	205990000	1242	2079320	966.13	194930	0	0	171470	0	0
	0.459152	-0.0380516	+	2.83402	-0.265942	+	3.84055	-0.227891	O14737	125	O14737	O14737	Programmed cell death protein 5	PDCD5	Y						KFNRRKVMDSDEDDDY_______________	19.9295	19.9032	19.8198	19.6086	19.6109	19.6352	19.8411	19.8718	19.8253	2			0.999997	1.1e-05	156.94	152.63	156.94	-0.094776	1696800000	125	8247680	37645	770400	0	0	673850	0	0
	0.711929	-0.163083	+	2.85549	-0.85516	+	3.68229	-0.692077	Q9GZT9	125	Q9GZT9	Q9GZT9	Egl nine homolog 1	EGLN1	S						GKVKAKPPADPAAAASPCRAAAGGQGSAVAA	21.3234	21.3025	21.0148	20.3934	20.4087	20.2732	21.0694	20.9876	21.0945	3			1	7.1e-06	148.64	132.7	135.54	-0.06069	936470000	125	17680000	51737	1988000	0	0	1731300	0	0
	1.92889	0.176302	+	1.8142	-0.337323	+	2.64484	-0.513625	O43166	1255	O43166	O43166	Signal-induced proliferation-associated 1-like protein 1	SIPA1L1	S						CHLPAVSKVLPAFRESPSGRLMRQDPVVHLS	14.9723	15.0108	14.8796	14.6823	14.6979	14.4704	15.1417	15.1389	15.111	3			0.753854	0.00165498	96.673	73.353	96.673	0.049248	21759000	1255	279665	91.881	26453	0	0	24880	0	0
	1.11111	-0.160529	+	2.82965	0.47562	+	3.07923	0.63615	O95453	557	O95453	O95453	Poly(A)-specific ribonuclease PARN	PARN	S						QCIPYTLQNHYYRNNSFTAPSTVGKRNLSPS	17.8517	17.7177	17.7418	18.2296	18.3313	18.1771	17.5349	17.7147	17.5801	3			0.988093	0.0250576	54.103	39.542	47.64	1.235	288270000	557	2262480	10405	187480	0	0	154370	0	0
	0.148192	0.0522814	+	2.01587	0.608499	+	1.48663	0.556217	O95456	54	O95456	O95456	Proteasome assembly chaperone 1	PSMG1	T						LQLARKREVRLLRRQTKTSLEVSLLEKYPCS	14.8896	15.0417	14.9202	15.6615	15.7001	15.3155	15.2175	14.9988	14.792	3			0.993892	0.0195193	65.022	54.168	65.022	0.014628	53803000	54	346553	0	25007	0	0	25405	0	0
	0.0323335	-0.00985718	+	3.28638	1.03336	+	4.47053	1.04322	O95544	64	O95544	O95544	NAD kinase	NADK	S						ASPALGSTKEFRRTRSLHGPCPVTTFGPKAC	18.6801	18.8357	18.5054	19.6972	19.6544	19.7696	18.5874	18.6954	18.7088	3			1	6.79e-11	200.58	160.92	200.58	0.36152	159260000	64	5302570	10223	329360	0	0	328050	0	0
	0.311217	-0.0585829	+	1.78408	-0.297779	+	2.09437	-0.239196	Q8WUZ0	126	Q8WUZ0	Q8WUZ0	B-cell CLL/lymphoma 7 protein family member C	BCL7C	S				yes		TEPSPGGTPQPSRPVSPAGPPEGVPEEAQPP	17.5465	17.5578	17.3497	17.1464	17.1635	17.2506	17.4979	17.4025	17.3777	3			0.991587	3.28e-19	166.19	150.3	166.19	0.19268	2231400000	126	1534740	1970	83658	68683	0	73442	65153	0
	0.215992	0.182933	+	1.07364	-0.700837	+	1.55503	-0.883771	Q9H4A3	1261	Q9H4A3	Q9H4A3	Serine/threonine-protein kinase WNK1	WNK1	S			yes	yes		SLTQVVHSAGRRFIVSPVPESRLRESKVFPS	13.2197	12.3889	13.0972	11.8782	12.3072	12.4179	13.485	12.8209	12.9487	2			0.999959	0.0562447	53.567	30.738	53.567	0.8754	15580000	1261	65897.5	853.36	8031	0	0	4246.7	0	0
	1.48024	-0.19198	+	3.85687	1.00954	+	5.18081	1.20152	O95639	202	O95639	O95639	Cleavage and polyadenylation specificity factor subunit 4	CPSF4	S						PPAKQSNNPPLQRSSSLIQLTSQNSSPNQQR	16.8843	17.0803	16.9272	17.9011	17.9896	18.0298	16.7828	16.7551	16.778	2			0.997659	8.68e-103	394.86	355.44	364.41	-0.22357	507610000	202	1550780	3027.9	97101	0	0	100440	0	0
	1.89466	-0.178633	+	2.98464	-0.931692	+	2.52801	-0.753059	Q8WXG6	1270	Q8WXG6	Q8WXG6	MAP kinase-activating death domain protein	MADD	S						KAHSLKPSIKEKLAGSPIRTSEDVSQRVYLY	15.1822	15.1657	15.1794	14.3067	14.3938	14.0318	15.0705	14.9275	14.9934	2			1	0.0494054	67.494	14.557	67.494	-0.63399	17418000	1270	264260	0	30512	0	0	27619	0	0
	0.238501	-0.0398242	+	2.59628	-0.30021	+	2.08825	-0.260386	Q7Z6E9	1277	Q7Z6E9	Q7Z6E9	E3 ubiquitin-protein ligase RBBP6	RBBP6	S						SSTLVDYTSTSSTGGSPVRKSEEKTDTKRTV	19.068	18.9891	18.9241	18.6643	18.6968	18.7194	18.8798	19.0514	18.9306	3			0.96628	2e-23	189.91	168.29	126.33	-0.23887	493630000	1277	4402480	12092	428780	0	0	363820	0	0
	1.14958	-0.162817	+	2.82139	-0.49434	+	2.78453	-0.331523	Q9BY89	128	Q9BY89	Q9BY89	Uncharacterized protein KIAA1671	KIAA1671	S						LVGQEVGSGEGPRTSSPLFNKAVFLRPSSST	19.9524	19.9794	19.7952	19.4679	19.4037	19.3724	19.7842	19.7754	19.679	2			0.999634	0.00158061	146.48	111.16	146.48	-0.5289	259650000	128	7665250	0	782460	0	0	709410	0	0
	0.0224749	-0.00677045	+	1.88022	-0.399513	+	2.01964	-0.392743	Q9C0C2	1282	Q9C0C2	Q9C0C2	182 kDa tankyrase-1-binding protein	TNKS1BP1	T						EFLKSRERGVGQADWTPDLGLRNMAPGAVCS	16.7814	16.5149	16.6604	16.2129	16.3594	16.1858	16.7629	16.5399	16.6335	2			1	0.000152928	146.3	118.61	146.3	-0.58611	93717000	1282	855534	0	90533	0	0	68597	0	0
	1.45203	0.429639	+	3.15418	1.20718	+	3.85433	0.777541	O95685	28	O95685	O95685	Protein phosphatase 1 regulatory subunit 3D	PPP1R3D	S			yes			ALGSRKLGPRSLSCLSDLDGGVALEPRACRP	13.2122	12.9503	13.3874	14.3718	14.3806	14.419	13.5856	13.7144	13.5388	2			0.99999	3.54e-15	203.59	171.21	203.59	-0.93961	20722000	28	135333	0	7990.4	0	0	6200.7	0	0
	0.0171018	0.00403913	+	1.64673	-0.296349	+	3.09051	-0.300388	Q92844	129	Q92844	Q92844	TRAF family member-associated NF-kappa-B activator	TANK	S				yes		EVSSPRKETSARSLGSPLLHERGNIEKTFWD	16.0124	15.81	15.7617	15.5074	15.5997	15.588	15.87	15.8903	15.836	3			0.999374	0.00125694	113.52	92.682	113.52	-0.011271	51280000	129	506919	1334.6	53665	0	0	42648	0	0
	0.93738	-0.143698	+	1.86914	0.50131	+	2.1286	0.645007	O95785	1146	O95785	O95785	Protein Wiz	WIZ	S						LHISPLAKKLPPPPGSPLGHSPTASPPPTAR	18.7867	18.8047	18.9049	19.224	19.2168	19.5595	18.5719	18.781	18.7124	4			0.999877	6.84e-18	198.02	189.2	126.8	-0.70011	614710000	1146	4822030	0	354130	0	0	321290	0	0
	1.53754	-0.262151	+	2.24578	0.491537	+	3.45213	0.753688	O95785	983	O95785	O95785	Protein Wiz	WIZ	S						SPPGFSAKGLGHPPSSPLLKKTPLALAGSPT	19.7013	19.6627	19.4727	20.1529	19.9896	20.1689	19.3258	19.4182	19.3063	3			0.967666	0.000376483	118.52	82.238	118.52	0.22187	985170000	983	7994610	2837.6	659620	0	0	573000	0	0
	0.883126	0.169303	+	2.12351	0.453848	+	1.92799	0.284545	O95801	51	O95801	O95801	Tetratricopeptide repeat protein 4	TTC4	S				yes		EKEFEKVPLFMSRAPSEIDPRENPDLACLQS	18.7374	18.5242	18.4892	19.1065	19.0591	18.9467	18.8121	18.6663	18.7804	2			1	0.00044069	122.94	59.123	122.94	-0.016344	172740000	51	4236680	2009.2	342440	0	0	265910	0	0
	0.604622	-0.141978	+	1.17938	0.345922	+	1.62351	0.4879	O95817	377	O95817	O95817	BAG family molecular chaperone regulator 3	BAG3	S						VEVKVPPAPVPCPPPSPGPSAVPSSPKSVAT	16.8864	16.6476	16.8544	17.0155	17.0373	17.3733	16.6062	16.5569	16.7993	3			0.997432	0.00162321	71.073	53.584	63.706	1.4548	338760000	377	1116400	0	32122	65115	0	20586	54437	0
+	3.01975	1.31848	+	4.16962	2.58112	+	4.34021	1.26264	O95983	56	O95983	O95983	Methyl-CpG-binding domain protein 3	MBD3	S						KKFRSKPQLARYLGGSMDLSTFDFRTGKMLM	15.5468	15.9418	16.0048	18.4971	18.399	18.3406	17.1525	17.2322	17.0641	2			0.999998	2.5e-29	276.19	201.58	156.24	-0.13191	325750000	56	1794410	4183.8	39098	0	0	46613	0	0
	0.109537	0.0328706	+	2.06037	-0.428204	+	2.73536	-0.461075	O00151	130	O00151	O00151	PDZ and LIM domain protein 1	PDLIM1	S						HIGSAHNRSAMPFTASPASSTTARVITNQYN	19.3359	19.182	19.0278	18.7393	18.7516	18.7702	19.3074	19.0965	19.2403	2			0.990475	2.79e-35	271.45	227.73	271.45	1.129	901990000	130	4972370	7468.2	514450	0	0	414340	0	0
	0.319485	-0.0938209	+	2.414	1.24008	+	2.7443	1.3339	P00519	718	P00519	P00519	Tyrosine-protein kinase ABL1	ABL1	S						EEGGGSSSKRFLRSCSASCVPHGAKDTEWRS	15.707	15.8082	16.0766	17.4345	16.8425	17.0351	15.8452	15.7851	15.6801	3			0.763488	0.000444167	115.05	82.554	115.05	0.047796	36011000	718	808012	247.75	43600	0	0	42597	0	0
+	3.70088	2.24812	+	4.59924	3.23875	+	3.04324	0.99063	P00533	1166	P00533	P00533	Epidermal growth factor receptor	EGFR	S				yes		FDSPAHWAQKGSHQISLDNPDYQQDFFPKEA	15.078	14.8748	15.3551	18.3745	18.4019	18.2477	17.4889	17.1527	17.4105	3			0.989572	2.35e-24	236.64	211.75	236.64	0.37815	84132000	1166	1752800	2375.5	28423	0	0	22700	0	0
	0.901266	-0.496005	+	2.33251	1.3286	+	3.6916	1.82461	P00533	693	P00533	P00533	Epidermal growth factor receptor	EGFR	T				yes		TLRRLLQERELVEPLTPSGEAPNQALLRILK	17.5938	16.8697	16.9911	18.502	18.3614	18.577	16.6882	16.4235	16.8549	2			0.990997	6.95e-17	205.68	176.19	205.68	-0.10025	787450000	693	1943270	0	157330	0	0	87144	0	0
	1.24693	-0.230729	+	3.62275	0.988724	+	3.9116	1.21945	P01106	71	P01106	P01106	Myc proto-oncogene protein	MYC	S			yes			LPTPPLSPSRRSGLCSPSYVAVTPFSLRGDN	17.9056	17.7191	17.7383	18.7375	18.7108	18.8808	17.4315	17.6373	17.602	2			0.997623	3.01e-15	206.75	167.94	195.6	-0.25213	630580000	71	2713230	0	194480	0	0	154520	0	0
	0.637332	-0.0885251	+	2.40448	-0.417842	+	2.42564	-0.329317	Q08AD1	1319	Q08AD1	Q08AD1	Calmodulin-regulated spectrin-associated protein 2	CAMSAP2	S				yes		SGKRTPRSESVEGFLSPSRCGSRNGEKDWEN	16.5119	16.4497	16.3277	15.9683	16.1005	15.967	16.2783	16.3768	16.3686	2			0.998993	2.15e-06	169.79	129.64	115.24	-0.14559	343730000	1319	711373	0	75374	0	0	65648	0	0
	0.640421	-0.0876128	+	2.20343	-0.471446	+	2.23429	-0.383833	Q8IVL1	1319	Q8IVL1	Q8IVL1	Neuron navigator 2	NAV2	S						AQTSLQPGAKYPDVASPTLRRLFGGKPTKQV	18.537	18.4928	18.3451	18.1139	17.9671	17.8796	18.4021	18.3795	18.3305	2			0.988501	0.000820525	128.33	75.602	128.33	-0.81778	270300000	1319	2875300	3463.6	298800	0	0	260360	0	0
	0.115767	-0.0263398	+	1.96393	-0.340177	+	2.87782	-0.313837	O75152	132	O75152	O75152	Zinc finger CCCH domain-containing protein 11A	ZC3H11A	S						QLSVQQNKLSVQSNPSPQLRSVMKVESSENV	17.5669	17.7294	17.4755	17.2701	17.2217	17.2595	17.4952	17.6186	17.579	2			0.999988	1.84e-08	194.23	136	194.23	0.47168	216680000	132	1647690	1766.6	154470	0	0	155590	0	0
	0.332317	0.0569941	+	2.18282	0.520774	+	1.95346	0.463779	P02686	96	P02686	P02686	Myelin basic protein	MBP	S		yes				HPADPGSRPHLIRLFSRDAPGREDNTFKDRP	16.9804	16.9523	16.8299	17.3177	17.6145	17.3929	16.9052	16.9463	17.0822	3			1	0.000753229	93.371	70.271	93.371	0.30973	172400000	96	1327260	0	103660	0	0	92140	0	0
	0.440705	0.244928	+	1.69142	1.19482	+	1.74992	0.94989	P04049	301	P04049	P04049	RAF proto-oncogene serine/threonine-protein kinase	RAF1	S		yes				ESASPSALSSSPNNLSPTGWSQPKTPVPAQR	15.4068	15.128	15.8926	16.8614	16.2129	16.9375	15.8746	15.5878	15.6998	3			0.999576	2.97e-23	193.34	167.13	193.34	0.22225	111860000	301	656397	0	35545	0	0	26925	0	0
+	2.39043	-0.575064	+	4.113	1.6286	+	5.08996	2.20367	P04049	43	P04049	P04049	RAF proto-oncogene serine/threonine-protein kinase	RAF1	S		yes		yes		ISPTIVQQFGYQRRASDDGKLTDPSKTSNTI	17.0525	16.9779	16.7785	18.6045	18.4578	18.6324	16.4269	16.399	16.2578	4			0.999998	0.000272455	107.57	87.48	107.57	-0.16569	72435000	43	1892220	1380.2	108870	0	0	93744	0	0
+	3.20306	-0.63063	+	4.76136	1.9093	+	6.06611	2.53993	P04150	134	P04150	P04150	Glucocorticoid receptor	NR3C1	S				yes		LKLLEESIANLNRSTSVPENPKSSASTAVSA	17.1493	17.3563	17.191	19.1944	19.0472	19.1829	16.6142	16.5726	16.6179	2			0.999809	0.000242962	176.95	103.71	133.42	0.099687	91738000	134	2654730	0	116280	0	0	120990	0	0
	0.543395	-0.103731	+	1.59823	-0.338226	+	2.05109	-0.234495	O95295	133	O95295	O95295	SNARE-associated protein Snapin	SNAPIN	S				yes		ARRRAMLDSGIYPPGSPGK____________	19.7455	19.6884	19.4699	19.2249	19.3892	19.2751	19.5161	19.5336	19.5429	2			1	1.23e-09	178.85	153.47	135.72	0.0068774	767170000	133	6672510	9331	679750	0	0	583030	0	0
	0.0198058	-0.00635211	+	2.52693	-0.902288	+	2.99796	-0.895936	P55196	1330	P55196	P55196	Afadin	MLLT4	T						STSSQEHLNHSSKSVTPASTLTKSGPGRWKT	17.149	17.4943	17.3545	16.4121	16.6075	16.2712	17.3812	17.3408	17.2566	2			0.993148	0.00505751	119.74	95.788	119.74	0.76072	57576000	1330	1246560	0	116250	0	0	132780	0	0
	2.21937	-0.361231	+	4.2933	1.55091	+	4.65058	1.91215	P04792	15	P04792	P04792	Heat shock protein beta-1	HSPB1	S				yes		_MTERRVPFSLLRGPSWDPFRDWYPHSRLFD	19.766	19.6912	19.6003	21.1328	21.2099	21.3676	19.4127	19.3147	19.2465	2			1	7.48e-06	148.26	120.18	131.5	0.13649	2049200000	15	12726700	2037.6	689320	0	0	584130	0	0
	0.221449	-0.174734	+	4.17614	3.59293	+	3.44814	3.76766	P04792	78	P04792	P04792	Heat shock protein beta-1	HSPB1	S						IESPAVAAPAYSRALSRQLSSGVSEIRHTAD	15.9012	15.5072	15.7221	19.2433	19.0348	19.6312	15.757	14.9681	15.8812	2			0.999965	0.00201731	107.69	80.542	107.69	-1.5863	209620000	78	2543580	0	0	49757	0	0	34772	0
	0.162392	-0.0230999	+	3.86396	-1.42548	+	3.69349	-1.40238	Q8WUF5	134	Q8WUF5	Q8WUF5	RelA-associated inhibitor	PPP1R13L	S			yes			SSPRTPLYLQPDAYGSLDRATSPRPRAFDGA	18.2401	18.2704	18.1911	16.6435	16.978	16.8036	18.2846	18.2275	18.1201	2			1	9.74e-15	216.17	173.39	216.17	0.18102	861610000	134	2150020	0	244170	0	0	224080	0	0
	1.2489	-0.27618	+	3.98549	1.77247	+	5.16703	2.04865	P04792	82	P04792	P04792	Heat shock protein beta-1	HSPB1	S				yes		AVAAPAYSRALSRQLSSGVSEIRHTADRWRV	19.0207	18.7231	18.7257	20.5138	20.5632	20.7099	18.5805	18.4831	18.5774	2			0.798263	4.05e-07	214.69	143.75	175.6	-0.5641	18849000000	82	7822130	0	365460	49757	0	269310	34772	0
	2.02853	0.236741	+	2.67201	0.689949	+	2.00541	0.453208	P06241	21	P06241	P06241	Tyrosine-protein kinase Fyn	FYN	S				yes		CKDKEATKLTEERDGSLNQSSGYRYGTDPTP	17.6566	17.6358	17.542	18.3852	18.3999	18.1192	17.9066	17.7823	17.8557	3			0.999817	1.24e-12	225.1	201.86	150.91	-0.10576	701360000	21	2354870	4670.7	164190	0	0	146080	0	0
+	2.84803	0.60428	+	4.0045	2.32942	+	3.71778	1.72514	P07355;A6NMY6	26;26	P07355	P07355	Annexin A2;Putative annexin A2-like protein	ANXA2;ANXA2P2	S						LSLEGDHSTPPSAYGSVKAYTNFDAERDALN	15.9989	15.7447	15.9118	18.4536	18.0085	18.1815	16.4637	16.4782	16.5263	3			0.923491	0.000220205	94.389	68.024	94.389	0.080483	85990000	26	1479150	4118.5	53173	0	0	40812	0	0
	0.173197	-0.0742995	+	1.37368	1.14221	+	1.52559	1.21651	P07910	115	P07910	P07910	Heterogeneous nuclear ribonucleoproteins C1/C2	HNRNPC	S			yes			SAAEMYGSVTEHPSPSPLLSSSFDLDYDFQR	14.1807	13.7276	14.1358	15.3486	14.4592	15.663	14.0316	13.9977	13.7919	3			0.989194	3.66e-06	103.5	92.737	103.41	0.69979	139040000	115	224088	0	15440	0	0	10473	0	0
	0.547637	-0.133784	+	2.76124	-0.575706	+	2.33863	-0.441922	O60292	1364	O60292	O60292	Signal-induced proliferation-associated 1-like protein 3	SIPA1L3	S						EAAGRSHHADRRREVSPAPAVAGQSKGYRPK	17.4766	17.4614	17.2399	16.8092	16.8033	16.8384	17.4007	17.2367	17.1392	2			1	4.5e-09	183.87	155.96	183.87	-0.19651	85062000	1364	1328130	0	145270	0	0	129870	0	0
	0.522666	-0.262818	+	3.49194	1.89461	+	3.6574	2.15743	P08670	7	P08670	P08670	Vimentin	VIM	S				yes		_________MSTRSVSSSSYRRMFGGPGTAS	13.3772	13.3037	12.8848	15.0516	15.0012	15.1968	13.2433	12.7477	12.7863	3			0.930898	0.00834506	85.813	54.216	85.813	0.13807	29105000	7	163987	0	8939.4	0	0	7869.4	0	0
	0.293002	-0.0952298	+	2.29089	0.741319	+	5.09709	0.836549	P0C7T5	284	P0C7T5	P0C7T5	Ataxin-1-like	ATXN1L	S						NGGQRPRERNLVRRESEALDSPNSKGEGQGL	15.3746	15.0368	14.9436	15.8626	15.8148	15.9016	15.0171	15.0034	15.0488	4			0.896915	2.07e-28	181.84	167.09	181.84	-1.0823	89856000	284	395365	0	34776	0	0	25321	0	0
+	2.67581	-0.587205	+	3.56703	1.73898	+	4.24434	2.32618	P0CAP2;Q9BZD3	179;179	P0CAP2	P0CAP2	DNA-directed RNA polymerase II subunit GRINL1A;Putative GRINL1B complex locus protein 2	POLR2M;GCOM2	S						PSSEASEHHPRHRVSSQAEDTSSSFDNLFID	14.6101	14.3566	14.507	16.0595	16.1599	16.4713	13.9533	13.8283	13.9304	2			0.877458	2.12e-07	122.53	106.93	107.57	1.1023	163580000	179	367501	0	20676	0	0	16006	0	0
	0.969977	-0.154863	+	2.69007	-0.497875	+	3.57263	-0.343012	Q96IF1	137	Q96IF1	Q96IF1	LIM domain-containing protein ajuba	AJUBA	S						SSFASSSASDASKPSSPRGSLLLDGAGAGGA	18.9578	19.0768	18.8361	18.467	18.4465	18.4635	18.8572	18.7716	18.7773	2			0.86853	6.9e-09	167.05	150.11	167.05	0.078375	677500000	137	3966330	0	397800	0	0	385980	0	0
	1.16367	-0.273387	+	2.40928	-0.667514	+	1.91377	-0.394126	P11388	1377	P11388	P11388	DNA topoisomerase 2-alpha	TOP2A	S				yes		PKLSNKELKPQKSVVSDLEADDVKGSVPLSS	16.904	17.2172	17.0478	16.262	16.4763	16.4281	16.7687	16.8991	16.681	2			0.999996	2.1e-10	220.21	166.95	212.17	0.33749	68308000	1377	997161	0	98406	0	0	110150	0	0
	1.12605	-0.0706444	+	2.88125	-0.404942	+	2.3604	-0.334298	Q00536	138	Q00536	Q00536	Cyclin-dependent kinase 16	CDK16	S						DIRLPEGYLEKLTLNSPIFDKPLSRRLRRVS	20.3435	20.3618	20.3689	19.8775	20.0475	19.9344	20.2352	20.2936	20.3334	3			0.999365	1.28e-17	225.69	190.84	225.69	-0.11175	745060000	138	11003900	29128	1020900	0	0	918090	0	0
	0.647264	-0.327709	+	1.58355	0.842028	+	2.69525	1.16974	P10398	181	P10398	P10398	Serine/threonine-protein kinase A-Raf	ARAF	T						RQHEAPSNRPLNELLTPQGPSPRTQHCDPEH	16.9027	16.4194	16.2045	17.3991	17.1048	17.5486	16.3768	16.0622	16.1044	4			0.999649	0.00239664	79.016	65.334	67.367	-0.83557	116110000	181	1046830	921.89	76187	22134	0	47247	17075	0
	0.658097	-0.163373	+	1.91745	-0.564521	+	2.44834	-0.401148	Q9H3Q1	138	Q9H3Q1	Q9H3Q1	Cdc42 effector protein 4	CDC42EP4	S						NEKEAAEKGTSKLPKSLSSSPVKKANDGEGG	20.7814	21.1273	20.8012	20.4484	20.3442	20.2238	20.7514	20.7422	20.7263	3			0.999998	0.000202297	165.58	93.244	165.58	0.56493	580390000	138	15061700	20319	0	1375100	0	0	1538400	0
	0.199882	0.0388508	+	2.8215	-0.698963	+	3.53294	-0.737814	Q9NRA8	138	Q9NRA8	Q9NRA8	Eukaryotic translation initiation factor 4E transporter	EIF4ENIF1	S						GGCHVTAAVSSRRSGSPLEKDSDGLRLLGGR	19.3774	19.375	19.1653	18.5568	18.7205	18.5436	19.3043	19.3925	19.3376	3			0.993752	8.63e-05	123.19	92.124	123.19	-0.062754	381200000	138	5133660	4148.2	529200	0	0	471970	0	0
	0.668606	-0.140783	+	1.57272	0.306833	+	2.95702	0.447617	P10398	186	P10398	P10398	Serine/threonine-protein kinase A-Raf	ARAF	S				yes		PSNRPLNELLTPQGPSPRTQHCDPEHFPFPA	18.0379	17.8009	17.77	18.2123	18.1174	18.1996	17.7874	17.642	17.7571	4			0.999998	1.33e-21	205.65	189.24	67.367	-0.83557	185670000	186	2304010	1116.6	190660	22134	0	146210	17075	0
	1.98548	0.396191	+	4.42127	1.64384	+	5.20652	1.24765	P10644	77	P10644	P10644	cAMP-dependent protein kinase type I-alpha regulatory subunit;cAMP-dependent protein kinase type I-alpha regulatory subunit, N-terminally processed	PRKAR1A	S			yes			AKQIQNLQKAGTRTDSREDEISPPPPNPVVK	16.1728	16.4466	16.347	17.9594	17.9332	18.0053	16.7401	16.7629	16.6519	3			0.961791	9.49e-05	92.275	71.146	92.275	0.3435	124800000	77	1417950	2168.5	0	59846	0	0	65513	0
	1.04647	-0.168566	+	3.45243	-0.530641	+	2.0559	-0.362075	P48634	1386	P48634	P48634	Protein PRRC2A	PRRC2A	S						GDLSQRAKDLSKRSFSSQRPGMERQNRRPGP	18.178	18.1242	18.239	17.5843	17.694	17.671	18.038	18.1144	17.8831	2			0.948823	0.00567094	109.96	70.173	79.235	0.11737	300660000	1386	2302210	301.62	234080	0	0	203050	0	0
	1.25642	1.34319	+	2.50581	3.2947	+	3.9742	1.95151	P11166	473	P11166	P11166	Solute carrier family 2, facilitated glucose transporter member 1	SLC2A1	S				yes		RTFDEIASGFRQGGASQSDKTPEELFHPLGA	11.7249	13.4223	12.8962	16.0475	16.151	15.7291	14.0099	14.0169	14.0462	3			0.829469	9.8e-08	123.45	111.25	123.45	-0.70878	99202000	473	275619	0	2905.7	0	0	0	0	0
	1.05748	0.357023	+	2.15882	0.777787	+	1.53681	0.420764	P11171	709	P11171	P11171	Protein 4.1	EPB41	S				yes		ESVPEPRPSEWDKRLSTHSPFRTLNINGQIP	17.6401	17.3997	17.1999	18.3562	18.1297	18.0871	17.9164	17.5928	17.8015	3			0.976504	0.00183045	110.8	74.108	95.094	-0.45678	588980000	709	2172270	0	162360	0	0	124580	0	0
	0.0361475	-0.0465368	+	0.861096	0.88416	+	1.53848	0.930696	P11171	85	P11171	P11171	Protein 4.1	EPB41	S						KERTSESRGLSRLFSSFLKRPKSQVSEEEGK	17.3136	16.3575	17.755	18.2722	18.2611	17.5452	17.2507	16.8132	17.2226	2			0.867997	0.00215656	134.25	36.816	134.25	-0.062702	73110000	85	1766630	8.4422	130020	0	0	61694	0	0
	0.889487	-0.10294	+	1.91219	-0.41814	+	1.4394	-0.3152	Q96MW1	139	Q96MW1	Q96MW1	Coiled-coil domain-containing protein 43	CCDC43	T						EKQRKAALLAQYADVTDEEDEADEKDDSGAT	19.1766	19.2804	19.2388	18.7284	18.9966	18.7164	19.0404	19.1626	19.1839	3			1	1.3e-87	335.18	309.18	335.18	-0.069044	2058100000	139	4976440	14992	461640	0	0	442800	0	0
	0.31252	-0.0906404	+	3.78306	-1.10593	+	2.74514	-1.01529	O43426	1392	O43426	O43426	Synaptojanin-1	SYNJ1	S						PPIPARSQSQENMRSSPNPFITGLTRTNPFS	16.1415	16.1968	16.0981	14.8969	15.154	15.0677	16.2815	15.9079	15.975	2			0.978548	1.28e-10	221.85	132.68	221.85	-0.43387	86383000	1392	518319	0	58589	0	0	55356	0	0
	0.713319	-0.179372	+	1.43105	-0.579574	+	1.19085	-0.400201	P49792	1396	P49792	P49792	E3 SUMO-protein ligase RanBP2	RANBP2	T						SNKELVGPPLAETVFTPKTSPENVQDRFALV	15.9645	15.8445	16.2144	15.2888	15.7352	15.2607	15.8809	15.8462	15.7583	3			0.998082	1.73e-10	136.67	112.76	136.67	-0.14165	121370000	1396	508536	2407.7	0	51946	0	0	43652	0
	0.109177	-0.0310109	+	3.26849	0.801605	+	2.83947	0.832616	P11532	3623	P11532	P11532	Dystrophin	DMD	S				yes		GTTVSSPSTSLQRSDSSQPMLLRVVGSQTSD	19.0507	18.8941	18.8931	19.8135	19.8005	19.6287	18.8237	19.0916	18.8296	2			0.979266	8.06e-06	196.15	147.17	196.15	-0.17044	1339600000	3623	5837770	0	423770	0	0	341260	0	0
	1.48936	0.132273	+	2.94792	-0.276557	+	3.92749	-0.40883	O60437	14	O60437	O60437	Periplakin	PPL	S				yes		__MNSLFRKRNKGKYSPTVQTRSISNKELSE	16.7326	16.808	16.7003	16.4566	16.4871	16.4675	16.8975	16.9122	16.8281	3			0.804213	0.018932	57.434	36.205	57.434	0.23146	0	14	973914	1914.6	87577	0	0	83596	0	0
	0.739161	0.118914	+	2.88586	-0.558569	+	2.65582	-0.677483	P13051	14	P13051	P13051	Uracil-DNA glycosylase	UNG	S						__MIGQKTLYSFFSPSPARKRHAPSPEPAVQ	17.8166	17.7598	17.7497	17.0949	17.2325	17.323	17.9406	17.987	17.7553	2			0.999749	2.58e-13	237.48	193.8	237.48	0.29878	358810000	14	1874860	0	183060	0	0	158820	0	0
	0.39254	0.145833	+	3.2298	1.52849	+	4.33637	1.38265	P11717	2479	P11717	P11717	Cation-independent mannose-6-phosphate receptor	IGF2R	S						SSSAQQKTVSSTKLVSFHDDSDEDLLHI___	14.2701	13.8189	14.2484	15.6099	15.577	15.736	14.3552	14.1657	14.254	2			1	0.0212293	80.379	70.04	80.379	2.6956	83021000	2479	279009	0	4555.7	11852	0	4328.2	6810.1	0
	0.0934083	-0.0223223	+	2.04257	-0.483353	+	2.32744	-0.46103	Q5SW96	14	Q5SW96	Q5SW96	Low density lipoprotein receptor adapter protein 1	LDLRAP1	S						__MDALKSAGRALIRSPSLAKQSWGGGGRHR	19.717	19.5127	19.4778	19.116	19.1884	18.9529	19.5205	19.4922	19.6279	3			0.978939	0.000986683	115.57	61.551	115.57	0.40996	235860000	14	6317270	3221.3	666710	0	0	517850	0	0
+	2.45096	-0.435389	+	2.63683	0.557229	+	4.4136	0.992617	P12270	2116	P12270	P12270	Nucleoprotein TPR	TPR	T						IQMTRRQSVGRGLQLTPGIGGMQQHFFDDED	18.0236	17.8932	17.7918	18.4937	18.5154	18.3713	17.4911	17.4225	17.4889	3			1	1.26e-57	300.5	261.92	300.5	-0.18184	436210000	2116	2405790	938.8	195500	15243	0	164350	9421	0
	0.843519	-0.125742	+	2.14945	-0.387743	+	2.59574	-0.262001	Q9UQ35	1404	Q9UQ35	Q9UQ35	Serine/arginine repetitive matrix protein 2	SRRM2	S						DAVEKAGMSSNQSISSPVLDAVPRTPSRERS	20.3287	20.4711	20.2394	19.9519	20.0237	19.9004	20.2038	20.2514	20.2067	3			0.998986	8.66e-52	301.41	255.54	261.75	0.27384	4143100000	1404	10737500	9386.13	413530	553460	43666	478180	474330	35778
	1.61855	-0.458472	+	2.48553	1.13627	+	3.0816	1.59474	P12270	2137	P12270	P12270	Nucleoprotein TPR	TPR	T						MQQHFFDDEDRTVPSTPTLVVPHRTDGFAEA	19.5176	19.247	19.5488	20.7131	20.7411	20.268	19.1328	18.8305	18.9747	3			0.978533	3.55e-13	208.23	170.05	173.25	-0.11814	973870000	2137	8739730	0	582150	0	0	432940	0	0
	0.724739	-0.110019	+	1.82355	0.279936	+	3.03844	0.389955	P12270	2155	P12270	P12270	Nucleoprotein TPR	TPR	S						LVVPHRTDGFAEAIHSPQVAGVPRFRFGPPE	19.6192	19.5396	19.4083	19.7758	19.7686	19.8625	19.4203	19.3527	19.464	3			1	1.03e-27	200.91	184.11	186.63	0.46342	7694300000	2155	7254730	4105.6	623780	0	0	527340	0	0
	0.578414	-0.153651	+	1.89457	-0.572142	+	2.55543	-0.418491	Q9H3Q1	141	Q9H3Q1	Q9H3Q1	Cdc42 effector protein 4	CDC42EP4	S						EAAEKGTSKLPKSLSSSPVKKANDGEGGDEE	20.3636	20.7311	20.394	20.0291	19.9307	19.8125	20.3657	20.3265	20.3355	3			0.929412	0.000202297	165.58	93.244	165.58	0.56493	438120000	141	11373200	18480	0	1034900	0	0	1177700	0
	0.434841	0.0812912	+	2.41487	-0.404331	+	3.16676	-0.485622	Q9BY89	1410	Q9BY89	Q9BY89	Uncharacterized protein KIAA1671	KIAA1671	S						PRDCGRVPLDIKRAYSEKGPPANIREGLSIM	15.7287	15.5298	15.541	15.2062	15.1588	15.2215	15.6948	15.593	15.7556	3			0.964739	0.0159397	61.167	41.043	61.167	0.27426	51867000	1410	422359	993.48	44248	0	0	35306	0	0
	0.384439	-0.152855	+	2.81348	-1.32309	+	4.71588	-1.17023	Q9UHD8	142	Q9UHD8	Q9UHD8	Septin-9	44083	T						PSRFGLKRAEVLGHKTPEPAPRRTEITIVKP	21.9635	21.7748	21.3987	20.3947	20.4644	20.3086	21.5271	21.5526	21.5987	4			1	5.5e-09	182.82	161.26	106.93	0.50468	1939400000	142	23248800	39450	3072500	0	0	2380400	0	0
	0.104914	0.0178541	+	2.08168	-0.341412	+	1.78339	-0.359266	Q8IY33	143	Q8IY33	Q8IY33	MICAL-like protein 2	MICALL2	S						EPSGKKAPVQAAKLPSPAPARKPPLSPAQTN	14.718	14.7743	14.7474	14.5387	14.364	14.3129	14.8638	14.7703	14.6592	2			1	0.0147896	90.761	22.305	90.761	-0.43389	63733000	143	231793	0	22252	0	0	21214	0	0
	0.0194518	0.00539049	+	2.69361	0.386693	+	1.71167	0.381303	P12956	520	P12956	P12956	X-ray repair cross-complementing protein 6	XRCC6	S						DLTLPKVEAMNKRLGSLVDEFKELVYPPDYN	14.8858	14.9196	14.9721	15.2261	15.3915	15.3199	14.7943	14.9018	15.0975	2			1	0.056984	55.401	29.664	55.401	0.20361	18474000	520	315749	247.38	24940	0	0	23396	0	0
	0.147385	0.0455332	+	2.20509	-0.54959	+	3.38169	-0.595123	O43166	1433	O43166	O43166	Signal-induced proliferation-associated 1-like protein 1	SIPA1L1	S						DAASHTSTMSSRHSASPVVFTSARSSPKEEL	16.0553	16.2825	15.932	15.5752	15.5358	15.5101	16.2368	16.0669	16.1028	3			0.986926	0.000343631	120.21	110.13	120.21	0.17569	39425000	1433	568228	389.29	55255	0	0	58652	0	0
	0.159583	0.0492166	+	1.57522	-0.462782	+	1.79679	-0.511998	Q53GA4	144	Q53GA4	Q53GA4	Pleckstrin homology-like domain family A member 2	PHLDA2	S				yes		AAAAAPSEPSEPSRPSPQPKPRTP_______	16.5637	16.5299	16.2857	16.2021	15.9052	15.8836	16.3965	16.4776	16.6528	3			0.812093	2.38e-14	139.96	128.76	139.96	-0.056989	582750000	144	747634	0	78079	0	0	69296	0	0
	0.985731	-0.130188	+	2.22629	-0.337938	+	3.38272	-0.20775	Q96K21	144	Q96K21	Q96K21	Abscission/NoCut checkpoint regulator	ZFYVE19	S						HEVLTRGSSANASKWSPPQNYKKRVAALEAK	19.1804	19.2925	19.0808	18.8539	18.8709	18.8151	19.0716	19.054	19.0376	2			1	0.00354859	123.51	90.289	123.51	-0.36165	894620000	144	4844690	4321.2	462860	0	0	446400	0	0
	0.0742947	0.0361481	+	1.9805	1.04379	+	1.98754	1.00764	P13861	58	P13861	P13861	cAMP-dependent protein kinase type II-alpha regulatory subunit	PRKAR2A	S				yes		ARAPASVLPAATPRQSLGHPPPEPGPDRVAD	14.8609	14.4353	14.7652	15.6431	15.4545	16.0952	14.9303	14.5453	14.6943	4			0.767883	0.000393934	82.988	63.266	82.988	0.42743	39780000	58	342427	0	24522	0	0	16879	0	0
	0.0193795	-0.00575606	+	1.31698	0.456583	+	1.42099	0.462339	P14859	370	P14859	P14859	POU domain, class 2, transcription factor 1	POU2F1	S						NLSSDSSLSSPSALNSPGIEGLSRRRKKRTS	15.0897	15.0987	14.8507	15.2709	15.3967	15.7412	14.8959	15.048	15.0779	3			0.976432	1.2e-08	124.17	110.73	124.17	1.7193	26704000	370	343687	0	28652	0	0	26399	0	0
	1.51468	-0.16267	+	2.04763	0.314437	+	3.17803	0.477107	P15056	446	P15056	P15056	Serine/threonine-protein kinase B-raf	BRAF	S			yes	yes		SSEDRNRMKTLGRRDSSDDWEIPDGQITVGQ	17.3317	17.4622	17.4798	17.7455	17.8168	17.6547	17.2821	17.2751	17.2285	2			0.90962	4.24e-08	142.56	125.28	68.187	-0.34575	385850000	446	1684060	0	131640	0	0	129940	0	0
	0.674171	-0.173095	+	1.78723	0.502863	+	3.13441	0.675957	P15336	71	P15336	P15336	Cyclic AMP-dependent transcription factor ATF-2	ATF2	T						GPARNDSVIVADQTPTPTRFLKNCEEVGLFN	15.8148	15.6182	15.4334	16.2215	16.0106	16.1429	15.5022	15.3749	15.47	2			0.999446	3.13e-18	241.8	193.23	241.8	-0.028796	76090000	71	509790	0	46916	0	0	37475	0	0
+	3.16913	1.34842	+	2.9874	2.10452	+	1.44515	0.756096	P15822	1180	P15822	P15822	Zinc finger protein 40	HIVEP1	S						LNRTGKSGSLKVIGISQEESHPSRDGSHPHQ	13.8824	13.7623	14.116	16.384	15.6153	16.0749	15.4314	15.276	15.0986	3			0.999999	0.000183509	118.5	102.1	118.5	0.44114	31989000	1180	394555	0	12605	0	0	10721	0	0
	0.0722447	0.0109491	+	3.05019	-0.251835	+	2.17105	-0.262784	Q5TZA2	1451	Q5TZA2	Q5TZA2	Rootletin	CROCC	S						LRSALRRGLGLGRAPSPAPRPVPGSPARDAP	15.942	15.8946	15.8643	15.6175	15.6766	15.6513	15.8619	16.0074	15.8645	3			0.999993	0.00123178	84.829	56.431	84.829	-0.24632	95763000	1451	525433	0	51157	0	0	45153	0	0
	1.57463	-0.328161	+	2.64128	0.62063	+	4.99824	0.948792	P15924	165	P15924	P15924	Desmoplakin	DSP	S						RALYKAISVPRVRRASSKGGGGYTCQSGSGW	21.1707	20.8979	20.9064	21.6112	21.6196	21.6061	20.6365	20.623	20.731	4			0.999992	7.61e-84	354.51	303.48	354.51	0.29796	1911700000	165	21530300	13029	65639	1726300	0	51434	1266500	0
	0.385113	-0.123697	+	1.60356	0.542499	+	2.38605	0.666196	P15924	2209	P15924	P15924	Desmoplakin	DSP	S				yes		PHTGLLLLSVQKRSMSFQGIRQPVTVTELVD	20.3586	20.7597	20.4472	21.136	21.183	20.874	20.3345	20.516	20.3438	2			0.996632	0.000814098	175.66	43.523	157.28	-0.10818	1718800000	2209	15656700	836.32	1031400	0	0	1200600	0	0
	0.00776084	0.0022494	+	1.33327	-0.307746	+	1.52754	-0.309995	Q86WR7	146	Q86WR7	Q86WR7	Proline and serine-rich protein 2	PROSER2	T						GPAPAGKEHRKQDAETPPPPDPPAPETLLAP	17.9096	17.9248	17.6856	17.4377	17.6812	17.4778	17.731	17.8996	17.896	4			1	2.71e-13	144.61	134.47	144.61	0.93111	247710000	146	1994090	7462.5	72346	122660	0	81468	96042	0
	0.594816	-0.268249	+	2.61682	1.32131	+	3.63303	1.58956	P16333	85	P16333	P16333	Cytoplasmic protein NCK1	NCK1	S				yes		NLKDTLGIGKVKRKPSVPDSASPADDSFVDP	18.7026	18.1551	18.1947	19.559	19.6295	19.8278	18.1716	17.8869	18.1892	3			0.999455	4.25e-17	190.79	155.37	127.63	0.94865	1492300000	85	4608820	4288.1	334430	0	0	207340	0	0
	1.21257	-0.307779	+	2.54192	1.26825	+	2.97791	1.57602	P16949	25	P16949	P16949	Stathmin	STMN1	S				yes		ELEKRASGQAFELILSPRSKESVPEFPLSPP	18.8277	18.569	18.526	19.7756	19.7043	20.2476	18.377	18.1904	18.432	3			1	4.17e-09	185.14	159.67	87.511	0.019715	9217800000	25	5542700	2441.72	252860	111270	0	184950	89125	0
	0.0049535	-0.00176239	+	1.20382	-0.324505	+	1.82231	-0.322742	Q9UQ35	1463	Q9UQ35	Q9UQ35	Serine/arginine repetitive matrix protein 2	SRRM2	S						RDGSGTPSRHSLSGSSPGMKDIPRTPSRGRS	20.9412	21.264	20.9379	20.762	20.5945	20.8131	21.0363	21.1256	20.9759	4			0.998197	1.98e-14	207.53	170.54	207.53	0.063594	728870000	1463	18415300	39176	1533000	0	0	1686800	0	0
	0.574877	-0.148818	+	1.6518	-0.449899	+	1.92904	-0.301081	Q02880	1466	Q02880	Q02880	DNA topoisomerase 2-beta	TOP2B	S						PSYSQKSEDDSAKFDSNEEDSASVFSPSFGL	18.4773	18.8566	18.6766	18.1038	18.2691	18.2879	18.4666	18.5887	18.5088	3			0.999808	1.34e-64	307.4	281.23	307.4	0.8899	945130000	1466	3305470	2027.1	286920	0	0	332730	0	0
	0.195794	0.0785262	+	2.32259	0.904209	+	2.36247	0.825683	P16989	346	P16989	P16989	Y-box-binding protein 3	YBX3	S			yes			RPYNYRRRPRPPNAPSQDGKEAKAGEAPTEN	13.2482	13.656	13.3763	14.512	14.1505	14.3307	13.4146	13.6975	13.4041	3			1	0.0176075	58.671	35.792	58.671	-0.80909	24862000	346	134238	492.3	8188.7	0	0	9979.9	0	0
	0.528655	-0.078441	+	1.71521	-0.248711	+	4.60315	-0.17027	Q13283	149	Q13283	Q13283	Ras GTPase-activating protein-binding protein 1	G3BP1	S						QDEVFGGFVTEPQEESEEEVEEPEERQQTPE	20.2082	20.4038	20.2079	20.0368	20.0246	20.0124	20.1955	20.2	20.1891	3			1	1.08e-17	166.88	146.61	157.1	1.7942	1536500000	149	10703700	30109	931210	0	0	944420	0	0
	0.200833	-0.0300496	+	1.96596	-0.284485	+	2.5484	-0.254435	Q86U06	149	Q86U06	Q86U06	Probable RNA-binding protein 23	RBM23	S				yes		GYRYGHSKSPHFREKSPVREPVDNLSPEERD	17.7695	17.9434	17.9152	17.5269	17.636	17.6118	17.8587	17.8058	17.8735	4			1	7.29e-16	218.25	192.24	218.25	0.35624	705380000	149	2041630	5529.4	177300	0	0	179740	0	0
	1.1262	-0.368474	+	2.0267	0.88763	+	2.59512	1.2561	P17535	90	P17535	P17535	Transcription factor jun-D	JUND	S						ADGAPSAAPPDGLLASPDLGLLKLASPELER	13.7636	13.9227	13.5395	14.3874	14.5876	14.9137	13.4226	13.1696	13.5282	2			0.999176	0.0124905	58.487	43.514	58.487	-0.97856	18756000	90	154514	0	11626	0	0	11946	0	0
	0.430837	0.187359	+	2.05183	-0.903287	+	3.8157	-1.09065	Q8TF72	1497	Q8TF72	Q8TF72	Protein Shroom3	SHROOM3	S						PGRISLRISESVLRDSPPPHEDYEDEVFVRD	16.534	17.1348	16.6956	15.8309	15.8171	16.0066	16.9657	17.0646	16.8963	5			0.953146	7.19e-12	147.27	133.33	147.27	-0.026084	110100000	1497	912979	2972.7	76516	0	0	104200	0	0
	0.728405	-0.197072	+	1.7086	0.646843	+	2.65327	0.843915	P17544	53	P17544	P17544	Cyclic AMP-dependent transcription factor ATF-7	ATF7	T						GPARTDSVIIADQTPTPTRFLKNCEEVGLFN	18.1886	17.7921	17.8578	18.5226	18.43	18.8265	17.7157	17.7727	17.7588	2			0.999022	6e-18	236.43	202	236.43	-0.78574	402360000	53	2710630	3722.8	235760	0	0	162310	0	0
	1.17301	0.202408	+	2.85207	1.04781	+	2.32422	0.845405	P17812	587	P17812	P17812	CTP synthase 1	CTPS1	S						GSSSPDSEITELKFPSINHD___________	15.4469	15.358	15.4633	16.3857	16.302	16.7239	15.6083	15.5058	15.7614	3			0.999872	5.76e-08	129.64	123.06	129.64	-0.082705	22143000	587	584970	1168.4	0	36529	0	0	31443	0
	0.148943	-0.0240752	+	2.29586	-0.264909	+	2.01304	-0.240834	Q8N5I9	15	Q8N5I9	Q8N5I9	Uncharacterized protein C12orf45	C12orf45	S						_MEVHGKPKASPSCSSPTRDSSGVPVSKELL	18.6061	18.502	18.4752	18.3139	18.2322	18.2425	18.546	18.5515	18.4137	2			0.98556	2.54e-23	228.38	184.93	228.38	-0.15833	1090400000	15	3215290	0	313190	0	0	261960	0	0
	1.57566	-0.385953	+	1.95093	-0.775776	+	1.34581	-0.389823	P29966	150	P29966	P29966	Myristoylated alanine-rich C-kinase substrate	MARCKS	T				yes		SPKAEDGATPSPSNETPKKKKKRFSFKKSFK	22.3115	22.677	22.3908	21.7608	21.8682	21.423	22.1053	22.0758	22.0403	3			1	3.53e-60	349.2	289.6	245.92	0.038342	12601000000	150	40002900	24742.2	3715200	177800	0	4212800	161090	0
	0.964144	0.20188	+	3.70277	1.42339	+	4.23824	1.22151	P17858	775	P17858	P17858	ATP-dependent 6-phosphofructokinase, liver type	PFKL	S				yes		AYVSGELEHVTRRTLSMDKGF__________	17.7449	17.9722	17.6664	19.1669	19.1515	19.3353	17.964	17.9593	18.0659	2			0.999854	0.00197841	109.15	98.388	90.614	-0.12818	246190000	775	3490880	1457.7	174350	0	0	183270	0	0
	0.00461604	0.000522931	+	2.19075	0.609486	+	2.1806	0.608963	P18583	1026	P18583	P18583	Protein SON	SON	S			yes			SSYERSMMSYERSMMSPMAERSMMSAYERSM	15.619	15.6551	15.7043	16.0867	16.2408	16.4793	15.6887	15.6046	15.6866	2			0.999378	0.000279339	171.6	126.23	171.6	-0.96542	117190000	1026	565902	0	41068	0	0	38419	0	0
	0.157872	0.042345	+	1.26942	-0.331919	+	2.21686	-0.374264	Q14160	1508	Q14160	Q14160	Protein scribble homolog	SCRIB	S			yes			LEAEKRALWRAARMKSLEQDALRAQMVLSRS	19.1417	19.4325	19.4526	19.0346	19.1184	18.878	19.3925	19.3784	19.3829	3			1	0.00034045	134.21	83.999	134.21	0.65578	761500000	1508	5688680	875.94	450810	0	0	490590	0	0
	0.685439	-0.121681	+	1.49777	0.449807	+	2.06092	0.571487	P18583	1076	P18583	P18583	Protein SON	SON	S			yes			AYERSMMSAYERSMMSPMADRSMMSMGADRS	14.5716	14.8326	14.6675	15.0397	15.0093	15.3722	14.5651	14.5248	14.6168	2			0.999472	0.000892644	142.19	97.032	142.19	-1.4409	51391000	1076	267065	0	20142	0	0	22064	0	0
	1.29992	-0.255271	+	3.28623	0.986106	+	5.46603	1.24138	P18615	115	P18615	P18615	Negative elongation factor E	NELFE	S						EKGPVPTFQPFQRSISADDDLQESSRRPQRK	18.8374	19.0186	18.7041	19.8214	19.9012	19.7958	18.5956	18.5776	18.6211	2			0.999498	1.81e-59	342.02	296.14	127.71	0.68878	1136500000	115	5626180	0	366530	0	0	371130	0	0
	0.136931	-0.00970141	+	2.65588	-0.313155	+	2.53611	-0.303454	Q9Y4B5	1514	Q9Y4B5	Q9Y4B5	Microtubule cross-linking factor 1	MTCL1	S				yes		RSHVLTEQSGLRVLHSPPAVRRVDSITAAGG	17.2818	17.2639	17.2277	16.9702	17.001	16.8627	17.2339	17.289	17.2214	3			1	0.00103964	130.01	100.53	68.836	0.093966	193130000	1514	1323970	3222.5	127240	0	0	113680	0	0
	0.414904	-0.10288	+	4.52273	1.62144	+	4.33272	1.72432	P18615	51	P18615	P18615	Negative elongation factor E	NELFE	S				yes		SSSSTTSQGGVKRSLSEQPVMDTATATEQAK	17.1623	16.9548	17.1414	18.6759	18.6605	18.7865	16.9218	16.8817	17.1463	2			0.978888	6.32e-42	271.91	225.91	271.91	-2.1431	441100000	51	2217680	0	117310	0	0	92291	0	0
	0.334132	-0.250814	+	0.898632	0.596517	+	3.63833	0.847331	P20020	17	P20020	P20020	Plasma membrane calcium-transporting ATPase 1	ATP2B1	S						GDMANNSVAYSGVKNSLKEANHDGDFGITLA	13.9214	14.4206	14.9805	15.1317	15.0017	14.9787	14.1003	14.2071	14.2626	3			0.999991	0.0148855	54.368	38.976	54.368	0.45518	33007000	17	231870	0	12943	0	0	16712	0	0
	0.618946	-0.103495	+	1.62459	-0.559048	+	1.44272	-0.455553	Q9BUH6	152	Q9BUH6	Q9BUH6	Protein PAXX	C9orf142	S				yes		RRLAAAEETAVSPRKSPRPAGPQLFLPDPDP	17.718	17.7804	17.5569	16.9582	17.4096	17.0103	17.5165	17.6356	17.5927	3			1	7.52e-08	133.58	123.21	133.58	0.45186	229370000	152	1651380	5971.1	171190	0	0	161030	0	0
	0.898371	0.384938	+	4.07065	2.37362	+	3.57975	1.98868	P20810	71	P20810	P20810	Calpastatin	CAST	S						KPKEHTEPKSLPKQASDTGSNDAHNKKAVSR	12.6894	12.5293	12.979	15.1815	14.9778	15.1592	13.4164	12.9971	12.939	4			0.969198	0.00631236	75.55	61.958	75.55	0.04898	10605000	71	163062	0	5599.6	0	0	4668.2	0	0
	0.0933994	-0.00937494	+	2.54148	-0.38526	+	2.55387	-0.375885	Q9Y272	152	Q9Y272	Q9Y272	Dexamethasone-induced Ras-related protein 1	RASD1	Y						DVPLVICGNKGDRDFYREVDQREIEQLVGDD	14.4901	14.5639	14.5788	14.228	14.1929	14.0561	14.5657	14.5493	14.4898	4			1	0.0114481	76.522	32.213	76.522	-1.3696	54143000	152	199802	1777.9	19057	0	0	18407	0	0
	0.698409	-0.0605227	+	3.25988	-0.273712	+	2.51082	-0.213189	P38398	1524	P38398	P38398	Breast cancer type 1 susceptibility protein	BRCA1	S			yes			YMHSCSGSLQNRNYPSQEELIKVVDVEEQQL	16.5232	16.5793	16.6059	16.3199	16.2819	16.2854	16.4927	16.5691	16.4651	2			1	7.95e-05	161.21	116.13	161.21	-1.5906	66949000	1524	816808	0	75955	0	0	71645	0	0
	0.108743	0.0269254	+	1.42936	-0.338339	+	1.34423	-0.365264	P11388	1525	P11388	P11388	DNA topoisomerase 2-alpha	TOP2A	S						AKSVRAKKPIKYLEESDEDDLF_________	19.6054	19.7158	19.5667	19.1412	19.2493	19.4824	19.63	19.8017	19.537	2			1	5.21e-07	175.73	163.96	175.73	-0.018064	220130000	1525	6938680	11831	617980	0	0	593880	0	0
	0.51977	-0.0962388	+	2.27843	-0.504018	+	1.57977	-0.407779	Q70EL1	1531	Q70EL1	Q70EL1	Inactive ubiquitin carboxyl-terminal hydrolase 54	USP54	S						TSQGAKYTGRTLNYQSLPHRSRTDNSWAPWS	14.3239	14.3677	14.2948	13.6647	13.9717	13.8379	14.1953	14.3833	14.1191	3			0.998611	0.0186507	57.434	23.049	57.434	0.99139	0	1531	162867	0	17020	0	0	16126	0	0
	0.650113	-0.0919552	+	2.01721	-0.382861	+	1.82095	-0.290906	Q7KZ85	1532	Q7KZ85	Q7KZ85	Transcription elongation factor SPT6	SUPT6H	T			yes			DPVPGITPSSSSRTRTPASINATPANINLAD	19.2313	19.4016	19.2519	18.9481	18.7908	18.9973	19.1953	19.2666	19.147	3			0.840332	4.45e-47	290.05	257.13	255.95	0.54473	763270000	1532	5254620	10236.4	377010	102140	0	393770	86744	0
	1.40763	0.178217	+	2.37425	-0.51966	+	3.11413	-0.697877	O75376	1533	O75376	O75376	Nuclear receptor corepressor 1	NCOR1	S		yes	yes			KSTLTPTQRESIPAKSPVPGVDPVVSHSPFD	17.6545	17.4954	17.654	17.1362	16.9407	17.1681	17.8017	17.8092	17.7277	6			0.998346	2.47e-05	100.04	93.162	100.04	0.41757	141510000	1533	1708690	3224.78	128860	35094	0	102340	30547	0
	0.528335	0.120785	+	2.34997	-1.00867	+	2.48256	-1.12946	Q8IWZ3	1538	Q8IWZ3	Q8IWZ3	Ankyrin repeat and KH domain-containing protein 1	ANKHD1	T						TFTNVFGKKRANVVTTPSTNRKNKKNKTKET	17.0587	17.0832	17.2625	16.2891	16.288	15.8012	17.3499	17.3148	17.1019	3			0.940922	0.0298854	48.823	32.932	48.823	0.20908	165750000	1538	1117120	247.63	109330	0	0	100640	0	0
	0.180623	-0.0995598	+	1.52586	-0.614805	+	1.95598	-0.515245	P26358	154	P26358	P26358	DNA (cytosine-5)-methyltransferase 1	DNMT1	S						RRSKSDGEAKPEPSPSPRITRKSTRQTTITS	17.4118	18.0132	17.562	17.0816	17.101	16.9599	17.5059	17.7689	17.4136	4			0.993235	0.000410181	99.059	63.67	99.059	-0.26152	58815000	154	1612850	6118.5	139010	0	0	188410	0	0
	0.61011	0.210528	+	3.21502	1.66476	+	3.88762	1.45423	P21359	2543	P21359	P21359	Neurofibromin;Neurofibromin truncated	NF1	S				yes		QPSQANTKKLLGTRKSFDHLISDTKAPKRQE	16.6122	16.8571	17.1193	18.5959	18.6309	18.356	17.0383	17.1724	17.0095	3			0.999994	0.00565867	86.772	60.653	86.772	0.54711	79490000	2543	2016870	326.44	80694	0	0	86402	0	0
	1.24545	-0.389211	+	2.44105	1.01067	+	3.50162	1.39988	P21359	2597	P21359	P21359	Neurofibromin;Neurofibromin truncated	NF1	S						QRISSSQQHPHLRKVSVSESNVLLDEEVLTD	16.3376	16.2885	16.7036	17.4348	17.6374	17.2896	16.1238	15.9217	16.1166	3			0.971336	5.07e-25	241.59	199.14	241.59	0.37615	50834000	2597	1048510	415.58	66952	0	0	58889	0	0
	2.38645	-0.245721	+	3.92498	-0.532776	+	2.78373	-0.287055	Q9Y520	1544	Q9Y520	Q9Y520	Protein PRRC2C	PRRC2C	S						ENVLPPKREIAKRSFSSQRPVDRQNRRGNNG	20.9042	20.8194	20.8211	20.3491	20.324	20.2732	20.6323	20.6342	20.541	2			0.995618	0.0016955	142.12	74.91	124.89	0.023637	2076600000	1544	14301100	0	1494900	0	0	1249900	0	0
	1.42859	0.392352	+	2.16333	0.720254	+	1.51715	0.327902	P22102	464	P22102	P22102	Trifunctional purine biosynthetic protein adenosine-3;Phosphoribosylamine--glycine ligase;Phosphoribosylformylglycinamidine cyclo-ligase;Phosphoribosylglycinamide formyltransferase	GART	S						MLVKKIQPLAKATSRSGCKVDLGGFAGLFDL	13.4679	13.0802	13.2048	13.8685	13.9121	14.133	13.5781	13.5944	13.7573	3			1	0.029713	47.808	31.501	47.808	0.35475	8279400	464	119720	0	9508.1	0	0	6768.3	0	0
	0.224439	0.0463454	+	1.97554	-0.249025	+	1.97757	-0.295371	Q9Y618	1547	Q9Y618	Q9Y618	Nuclear receptor corepressor 2	NCOR2	S				yes		RGAPVIVPELGKPRQSPLTYEDHGAPFAGHL	20.2847	20.446	20.2999	20.0589	20.0988	20.1258	20.2658	20.4578	20.4461	4			0.997647	1.03e-34	222.47	185.88	222.47	-0.20837	815430000	1547	11657300	47046	980890	0	0	971710	0	0
	0.0361585	0.0129611	+	1.5577	0.394502	+	2.62714	0.381541	P22466	116	P22466	P22466	Galanin peptides;Galanin;Galanin message-associated peptide	GAL	S						EAGALDRLLDLPAAASSEDIERS________	17.243	17.5559	17.199	17.6956	17.6963	17.7895	17.4368	17.3104	17.2895	2			0.979128	1.32e-10	200.48	160.56	200.48	-1.0514	256930000	116	1684030	0	123920	0	0	138410	0	0
+	1.99566	1.57883	+	3.03376	2.23074	+	1.25767	0.651909	P22626	212	P22626	P22626	Heterogeneous nuclear ribonucleoproteins A2/B1	HNRNPA2B1	S						QSSRSGRGGNFGFGDSRGGGGNFGPGPGSNF	15.1282	14.5453	15.3855	17.2502	17.1608	17.3403	16.9184	16.134	16.7432	2			1	4.36e-28	219.04	198.39	59.57	0.91055	334480000	212	944634	0	29411	0	0	18178	0	0
	1.0609	0.302768	+	3.34529	1.43218	+	3.55296	1.12941	P22681	619	P22681	P22681	E3 ubiquitin-protein ligase CBL	CBL	S						SSSDPWTGRELTNRHSLPFSLPSQMEPRPDV	14.7106	14.3822	14.7523	16.135	15.9133	16.0932	14.9528	15.0096	14.791	4			0.9299	1.23e-07	122.66	100.42	122.66	-0.2254	183220000	619	392457	2318.9	22139	0	0	16284	0	0
	0.352338	-0.0485109	+	3.26748	-0.799683	+	3.2768	-0.751172	Q12802	1559	Q12802	Q12802	A-kinase anchor protein 13	AKAP13	S				yes		VPANCSVLRSSMRSLSPFRRHSWGPGKNAAS	18.4911	18.3426	18.3745	17.6751	17.6608	17.4733	18.2917	18.4134	18.3576	3			1	0.0090768	96.624	47.206	54.787	1.0558	295050000	1559	2632010	4178.8	289610	0	0	235270	0	0
+	2.11284	0.507023	+	4.04965	1.42986	+	3.93629	0.922838	P23588	207	P23588	P23588	Eukaryotic translation initiation factor 4B	EIF4B	S				yes		SDKTDTDWRARPATDSFDDYPPRRGDDSFGD	18.2469	18.5118	18.4945	19.898	19.8317	19.8131	19.0153	18.9365	18.8225	3			0.99987	4.2e-10	196.71	163.5	196.71	-0.13223	404650000	207	5705790	5997.9	245300	0	0	263710	0	0
	0.504398	-0.268711	+	2.55715	1.80101	+	3.42514	2.06972	P23588	230	P23588	P23588	Eukaryotic translation initiation factor 4B	EIF4B	S						RGDDSFGDKYRDRYDSDRYRDGYRDGYRDGP	17.4261	16.7078	17.2632	19.0107	18.6138	19.1756	16.9864	16.7035	16.901	3			1	0.00175308	113.42	73.857	113.42	0.26158	704970000	230	2485990	0	140360	0	0	78133	0	0
	0.5736	-0.181696	+	1.31941	0.468423	+	1.85753	0.650119	P23588	263	P23588	P23588	Eukaryotic translation initiation factor 4B	EIF4B	S						DMDRYGGRDRYDDRGSRDYDRGYDSRIGSGR	16.9014	17.1629	17.2642	17.7962	17.3587	17.5789	17.0122	17.0243	16.7468	3			0.999998	0.00591975	82.109	39.079	82.109	1.4114	64020000	263	1426050	1505	98238	0	0	106190	0	0
	2.17371	0.211374	+	4.06375	1.51847	+	3.81561	1.30709	P23588	283	P23588	P23588	Eukaryotic translation initiation factor 4B	EIF4B	S						RGYDSRIGSGRRAFGSGYRRDDDYRGGGDRY	17.9875	18.0522	17.9505	19.5495	19.6499	19.3462	18.2556	18.158	18.2107	3			0.999947	0.0106401	79.311	55.754	79.311	-0.076921	362320000	283	4163640	8092.3	205630	0	0	193420	0	0
	0.824708	-0.0781924	+	3.33228	-0.395466	+	2.27109	-0.317274	O15417	1579	O15417	O15417	Trinucleotide repeat-containing gene 18 protein	TNRC18	S						DDYELGAGIRKRHKGSEEEHDALIGMGKARG	18.1557	18.1528	18.1475	17.6822	17.8034	17.784	17.9934	18.1444	18.0837	4			1	5.13e-05	116.21	92.653	116.21	-0.99079	68966000	1579	2378100	3950	230540	0	0	207000	0	0
	0.451817	0.109989	+	1.81826	0.738087	+	1.82275	0.628099	P23588	497	P23588	P23588	Eukaryotic translation initiation factor 4B	EIF4B	S						NAWVKRSSNPPARSQSSDTEQQSPTSGGGKV	15.496	15.555	15.2284	16.0556	15.9754	16.4627	15.5907	15.4878	15.5308	2			0.806136	0.0002467	111.72	94.971	111.72	-0.61341	61834000	497	514984	0	0	37771	0	0	35911	0
	0.41828	-0.101082	+	1.71907	-0.397285	+	3.50511	-0.296202	Q8WWI1	1586	Q8WWI1	Q8WWI1	LIM domain only protein 7	LMO7	S				yes		AGSVKTSTTGVATTQSPTPRSHSPSASQSGS	20.564	20.2764	20.2416	19.9476	20.0071	19.9354	20.2671	20.235	20.2766	2			0.999948	9.36e-39	303.07	271.55	303.07	-0.08559	1453100000	1586	10921200	7719.1	1186100	0	0	866730	0	0
	0.591216	-0.146339	+	2.06942	0.266913	+	1.76634	0.413252	P25391	1457	P25391	P25391	Laminin subunit alpha-1	LAMA1	S						VTGSASDCALCACPHSPPASFSPTCVLEGDH	15.5015	15.6126	15.656	15.8425	15.8123	15.9161	15.604	15.2583	15.4688	4			0.969802	1.36e-42	224.5	212.18	224.5	-0.80565	83884000	1457	468030	0	37914	0	0	37334	0	0
	0.21034	0.0690899	+	1.48831	-0.582165	+	2.05306	-0.651255	Q15742	159	Q15742	Q15742	NGFI-A-binding protein 2	NAB2	S						GHGSPGEKAGSARSFSPKSPLELGEKLSPLP	16.1442	16.0008	15.7243	15.3762	15.6033	15.1433	16.0001	15.9876	16.0889	2			0.831349	0.0104233	88.768	40.027	88.768	-0.44652	178830000	159	517987	0	58699	0	0	48504	0	0
	1.27244	-0.521264	+	1.74226	1.43413	+	2.16116	1.95539	P27361	202	P27361	P27361	Mitogen-activated protein kinase 3	MAPK3	T			yes	yes		LARIADPEHDHTGFLTEYVATRWYRAPEIML	13.4009	13.2417	13.6534	14.9348	15.4375	14.2261	13.0946	13.0246	12.6131	3			0.999984	1.02e-07	148.29	128.53	148.29	0.13413	28457000	202	155356	0	0	9084.7	0	0	7547.3	0
	1.30495	-0.529618	+	2.67586	1.25914	+	4.62083	1.78876	P27361	204	P27361	P27361	Mitogen-activated protein kinase 3	MAPK3	Y			yes			RIADPEHDHTGFLTEYVATRWYRAPEIMLNS	19.5461	19.4893	18.9943	20.6378	20.5397	20.6296	18.8872	18.8877	18.666	3			1	5.34e-87	366.58	341.17	366.58	0.42496	1783000000	204	8550710	6287.6	584480	9084.7	0	502230	7547.3	0
	0.16836	-0.0155691	+	2.93383	-0.276124	+	2.94111	-0.260555	P52888	16	P52888	P52888	Thimet oligopeptidase	THOP1	S						MKPPAACAGDMADAASPCSVVNDLRWDLSAQ	18.2749	18.32	18.2301	18.0112	18.0274	17.958	18.229	18.2441	18.3053	3			0.998222	9.39e-18	172.03	149.3	121.09	-1.6678	525260000	16	2701860	8026	250030	0	0	231710	0	0
	0.325017	0.0386588	+	3.05352	-0.536755	+	3.74217	-0.575414	Q12815	16	Q12815	Q12815	Tastin	TROAP	S						MTTRQATKDPLLRGVSPTPSKIPVRSQKRTP	18.3972	18.3785	18.2517	17.7687	17.8845	17.764	18.3721	18.4145	18.3568	3			0.953541	0.00274351	85.837	66.743	85.837	-0.48687	123920000	16	2719870	7558.6	271710	0	0	241030	0	0
+	3.25526	1.02528	+	5.2093	1.41991	+	1.86061	0.394627	P27815	13	P27815	P27815	cAMP-specific 3',5'-cyclic phosphodiesterase 4A	PDE4A	S						___MEPPTVPSERSLSLSLPGPREGQATLKP	14.1363	14.1513	14.0165	15.5189	15.5488	15.4961	15.0195	15.3117	15.0488	2			0.960542	0.00188348	91.752	53.459	91.752	-0.14999	0	13	316310	24.815	14981	0	0	13937	0	0
	0.661553	0.254956	+	2.93501	1.16933	+	2.76002	0.914371	P27815	145	P27815	P27815	cAMP-specific 3',5'-cyclic phosphodiesterase 4A	PDE4A	S						GLVLHAGAATSQRRESFLYRSDSDYDMSPKT	14.5358	14.2314	14.6829	15.56	15.6799	15.7181	14.5285	14.9168	14.7696	3			1	0.00132811	132.88	105.1	132.88	0.17858	56410000	145	320302	924.23	19657	0	0	14710	0	0
	0.771189	-0.148865	+	2.26344	-0.432423	+	2.09677	-0.283558	P42166;P42167	160;160	P42166;P42167	P42166	Lamina-associated polypeptide 2, isoform alpha;Thymopoietin;Thymopentin;Lamina-associated polypeptide 2, isoforms beta/gamma;Thymopoietin;Thymopentin	TMPO	T						KLLKLREQGTESRSSTPLPTISSSAENTRQN	21.8341	21.7424	21.5823	21.3158	21.2289	21.3168	21.6423	21.5951	21.4747	2			0.996082	2.33e-94	387.91	324.25	387.91	-0.25117	19439000000	160	27496600	45286	2786400	27242	0	2300700	28351	0
+	2.87261	0.725414	+	3.64918	1.21596	+	2.29302	0.490548	P28290	668	P28290	P28290	Sperm-specific antigen 2	SSFA2	S				yes		EFTQYTTHHILKSLASIEAKCSDMSSENTTG	19.7076	19.947	19.8574	21.0695	21.1586	20.9317	20.4597	20.5667	20.6617	2			0.999971	0.00184842	141.88	40.232	118.28	-0.38617	1323700000	668	14832200	0	662450	0	0	694050	0	0
	0.923903	0.123088	+	3.00214	-0.659459	+	3.46073	-0.782547	O94811	160	O94811	O94811	Tubulin polymerization-promoting protein	TPPP	S						EGKAPIISGVTKAISSPTVSRLTDTTKFTGS	17.5811	17.4734	17.4107	16.8667	16.9052	16.7149	17.6722	17.6189	17.5433	2			0.984289	5.36e-05	196.52	120.35	196.52	-0.86186	132760000	160	1503450	0	155970	0	0	130930	0	0
+	3.50954	0.616049	+	5.52868	1.21171	+	3.64011	0.595661	P28290	737	P28290	P28290	Sperm-specific antigen 2	SSFA2	S						KQRYLFAKAGYPLRRSQSLPTTLLSPVRVVS	16.1585	16.1202	16.2171	17.3992	17.3472	17.3845	16.8112	16.6934	16.8394	2			0.999991	1.08e-13	211.7	132.47	87.566	-0.1067	295170000	737	1122140	0	36084	23184	0	27404	25167	0
+	2.54584	-1.0071	+	2.93428	1.47519	+	3.78803	2.4823	P28482	185	P28482	P28482	Mitogen-activated protein kinase 1	MAPK1	T			yes			LARVADPDHDHTGFLTEYVATRWYRAPEIML	17.1534	17.2706	16.9074	18.5613	18.8438	18.3518	16.0864	16.3038	15.9199	3			0.999963	2.86e-32	264.1	242.7	264.1	0.35655	254580000	185	1899980	4583.7	0	116600	0	0	114190	0
+	1.7216	-0.566645	+	3.48431	1.42822	+	4.42793	1.99486	P28482	187	P28482	P28482	Mitogen-activated protein kinase 1	MAPK1	Y			yes			RVADPDHDHTGFLTEYVATRWYRAPEIMLNS	21.4635	21.4158	21.0897	22.7523	22.6801	22.8212	20.8139	20.8778	20.5773	3			1	2.25e-51	305.33	269.57	264.1	0.35655	5779800000	187	36561700	30417.7	2070200	116600	0	1754500	114190	0
	0.443945	0.118719	+	2.95527	1.39752	+	2.60148	1.2788	P29353	139	P29353	P29353	SHC-transforming protein 1	SHC1	S						VEGGQLGGEEWTRHGSFVNKPTRGWLHPNDK	17.7358	17.9114	17.8122	19.4587	19.2754	18.9179	17.8355	18.1446	17.8356	3			1	0.00220151	104.17	67.589	104.17	-0.14049	377470000	139	3444240	0	173270	0	0	175910	0	0
	1.75827	0.141889	+	3.00023	-0.496639	+	3.14253	-0.638528	Q5VUA4	161	Q5VUA4	Q5VUA4	Zinc finger protein 318	ZNF318	T						KSLRITVGNDHFCVSTPERRRLSDRLGSPVD	17.913	17.9206	17.9168	17.4824	17.305	17.4731	18.0802	18.1079	17.988	4			0.978284	4.34e-10	178.22	154.21	178.22	0.33682	164180000	161	2110630	6677.8	195470	0	0	177000	0	0
	0.743753	0.0787684	+	2.11814	-0.362258	+	2.59315	-0.441027	Q9HAU0	161	Q9HAU0	Q9HAU0	Pleckstrin homology domain-containing family A member 5	PLEKHA5	S						SRASKKVHNFGKRSNSIKRNPNAPVVRRGWL	16.7146	16.6187	16.7572	16.2782	16.4549	16.2707	16.73	16.8206	16.7761	3			0.792355	0.00148381	84.829	67.751	84.829	-3.4958	209710000	161	909916	0	86520	0	0	73575	0	0
	0.0483119	-0.0119756	+	3.09022	-0.623659	+	2.91918	-0.611684	O43166	162	O43166	O43166	Signal-induced proliferation-associated 1-like protein 1	SIPA1L1	S						ENMDSRFLMPEAYPSSPRKALRRIRQRSNSD	16.4193	16.3252	16.2239	15.6234	15.7535	15.7206	16.3304	16.4098	16.1923	2			0.998622	1.06e-08	197.36	154.05	197.36	0.0098859	57963000	162	648513	0	70773	0	0	60363	0	0
	0.0396613	0.00891876	+	4.59493	0.774428	+	3.18698	0.76551	P29353	427	P29353	P29353	SHC-transforming protein 1	SHC1	Y						PPPPCPGRELFDDPSYVNVQNLDKARQAVGG	15.9977	15.9911	15.936	16.7561	16.6955	16.7965	15.9887	15.8535	16.1093	3			0.998318	1.6e-10	194.7	170.41	153.23	0.92429	77223000	427	741742	1137.8	53128	0	0	48190	0	0
	1.30974	-0.202032	+	2.1123	0.497714	+	3.05513	0.699746	P35611	12	P35611	P35611	Alpha-adducin	ADD1	S				yes		____MNGDSRAAVVTSPPPTTAPHKERYFDR	20.1379	20.0414	19.9051	20.4854	20.4223	20.6699	19.7842	19.8728	19.8214	4			0.887236	3.64e-05	144.73	123.27	114.34	0.057475	553220000	12	10871000	13586	887700	0	0	739710	0	0
	0.394555	0.133262	+	1.62413	-0.478682	+	2.31733	-0.611944	Q92974	163	Q92974	Q92974	Rho guanine nucleotide exchange factor 2	ARHGEF2	S						KSVSTTNIAGHFNDESPLGLRRILSQSTDSL	18.9048	18.8737	18.5429	18.3582	18.1573	18.3698	18.9828	18.9978	18.7406	4			1	2.08e-47	291.92	263.77	291.92	0.28208	368350000	163	3823440	8682.7	383710	0	0	336580	0	0
	0.477036	0.0907911	+	3.15405	-1.25685	+	3.67975	-1.34764	Q9NQT8	1644	Q9NQT8	Q9NQT8	Kinesin-like protein KIF13B	KIF13B	S			yes			SPGRERPDLEAPAPGSPFRVRRVRASELRSF	17.4035	17.2554	17.1178	16.1528	16.0519	15.8014	17.3451	17.3588	17.3452	3			1	2.78e-07	171.39	130.13	171.39	0.14331	212830000	1644	1158980	2208.8	138220	0	0	113030	0	0
	0.933048	0.70083	+	2.3541	2.07449	+	2.40312	1.37366	P35658	1023	P35658	P35658	Nuclear pore complex protein Nup214	NUP214	S						AVVQAPRHAPVVRTPSIQPSLLPHAAPFAKS	18.7885	18.3507	19.436	21.1628	20.6002	21.0357	19.8577	19.3398	19.4802	3			0.903296	8.68e-22	224.49	200.01	224.49	-0.038592	720660000	1023	10819500	16711	354550	0	0	236560	0	0
	0.00135606	0.000570615	+	1.72499	-0.413365	+	1.32082	-0.413936	P30291	165	P30291	P30291	Wee1-like protein kinase	WEE1	S						SPRGCGARRAGEGRRSPRPDHPGTPPHKTFR	15.6151	15.8422	15.6835	15.4504	15.1565	15.2937	15.9027	15.7476	15.4922	3			1	0.0432856	47.942	36.503	47.942	0.49282	19419000	165	445912	21.019	0	40955	0	0	43583	0
	0.0376416	0.00693067	+	2.27713	-0.246108	+	1.81609	-0.253039	Q8WUD4	165	Q8WUD4	Q8WUD4	Coiled-coil domain-containing protein 12	CCDC12	S						LASAVDAATEQKTCDSD______________	19.6154	19.5479	19.5063	19.2555	19.3117	19.3641	19.4763	19.5526	19.6615	3			0.998105	2.29e-37	255	243.69	255	-0.21458	884260000	165	6664450	4111	622180	0	0	530330	0	0
	0.696418	-0.0877825	+	3.12514	-0.525536	+	4.23288	-0.437753	Q9NZN8	165	Q9NZN8	Q9NZN8	CCR4-NOT transcription complex subunit 2	CNOT2	S				yes		GIPSRTNSMSSSGLGSPNRSSPSIICMPKQQ	20.0524	20.1398	19.9518	19.5544	19.5059	19.5071	19.9312	19.9544	19.9951	2			1	6.23e-23	263.84	223.8	174.19	1.2262	1404500000	165	8561610	0	553890	283650	0	545000	245450	0
+	4.25712	-0.304368	+	2.90664	0.215951	+	4.3385	0.52032	P35658	437	P35658	P35658	Nuclear pore complex protein Nup214	NUP214	T				yes		LEGERQPKSPGSTPTTPTSSQAPQKLDASAA	17.9653	17.9713	18.0002	18.162	18.1804	18.2422	17.6645	17.6589	17.7003	2			0.978009	2.96e-07	163.8	127.78	163.8	-0.47191	253660000	437	2338620	1596.58	23921	178620	0	19620	163530	0
	0.502566	-0.0635007	+	2.88471	-0.489893	+	2.66452	-0.426392	Q9C0C2	1654	Q9C0C2	Q9C0C2	182 kDa tankyrase-1-binding protein	TNKS1BP1	S						GTKGLKVNLFPGLSPSALKAKLRPRNRSAEE	18.4953	18.4878	18.3739	17.9968	18.0204	17.8701	18.4321	18.4231	18.3113	2			0.837913	0.000245671	120.13	72.125	120.13	-0.64007	200490000	1654	2869560	0	290450	0	0	259470	0	0
	0.0603539	-0.0708332	+	2.00434	2.22526	+	2.96894	2.2961	P36507;Q02750	226;222	P36507;Q02750	P36507	Dual specificity mitogen-activated protein kinase kinase 2;Dual specificity mitogen-activated protein kinase kinase 1	MAP2K2;MAP2K1	S				yes		CDFGVSGQLIDSMANSFVGTRSYMAPERLQG;CDFGVSGQLIDSMANSFVGTRSYMSPERLQG	15.3504	14.4582	15.8323	17.5331	17.8436	16.94	15.2591	15.1076	15.0617	2			0.999891	4.4e-28	225.3	201.77	225.3	0.12306	326180000	226	822497	0	34209	0	0	17141	0	0
	2.09276	-0.357206	+	2.0952	0.591913	+	2.64666	0.949119	P37802	163	P37802	P37802	Transgelin-2	TAGLN2	S						PNWFPKKSKENPRNFSDNQLQEGKNVIGLQM	16.1538	16.211	16.1266	16.5589	16.7409	16.9674	15.6803	15.8232	15.9162	2			1	1.68e-08	198.38	142.3	198.38	-0.048751	76761000	163	745228	0	59079	0	0	55888	0	0
	0.798687	0.413698	+	3.24948	2.29718	+	4.40834	1.88349	P39880	1496	P39880	P39880	Homeobox protein cut-like 1	CUX1	S						AANLNSIIHRLEKAASREEPIEWEF______	16.0452	16.6558	15.9324	18.4561	18.4641	18.6048	16.5273	16.7888	16.5584	2			1	0.000870892	130.61	116.6	78.486	-0.05772	175500000	1496	1778250	668.17	54875	0	0	75439	0	0
+	2.77267	-0.362336	+	3.4133	0.584697	+	4.23467	0.947033	P40763	727	P40763	P40763	Signal transducer and activator of transcription 3	STAT3	S			yes			CVTPTTCSNTIDLPMSPRTLDSLMQFGNNGE	19.343	19.2261	19.27	19.7949	19.8625	19.9357	18.9492	18.849	18.9538	2			1	1.98e-42	271.72	246.4	271.72	-0.43627	2593800000	727	6456330	14661	516960	0	0	426860	0	0
	1.49446	-0.275333	+	2.22712	-0.6511	+	1.65212	-0.375766	Q8IWZ3	1679	Q8IWZ3	Q8IWZ3	Ankyrin repeat and KH domain-containing protein 1	ANKHD1	S				yes		VSLPLSSPNIKLNLTSPKRGQKREEGWKEVV	22.256	22.2327	22.0188	21.4824	21.6989	21.3729	21.8201	21.9562	21.9052	2			0.993046	0.00410032	121.41	33.927	121.41	-0.26059	929190000	1679	34498400	3119.7	3748900	0	0	3241700	0	0
	0.00191626	0.000754674	+	2.8535	0.535679	+	1.67688	0.534925	P41162	159	P41162	P41162	ETS translocation variant 3	ETV3	S						PTASSRFHFPPLDTHSPTNDVQPGRFSASSL	15.122	15.103	15.0966	15.73	15.5099	15.6887	15.2309	14.8514	15.2416	3			0.997413	5.84e-06	121.21	108.54	121.21	1.463	33073000	159	376841	2007.1	29287	0	0	26476	0	0
	0.920056	-0.139985	+	2.94279	-0.628339	+	3.09111	-0.488354	O75179	1696	O75179	O75179	Ankyrin repeat domain-containing protein 17	ANKRD17	S						EGTSNSLSTCTKSGPSPLSSPNGKLTVASPK	20.0233	20.0798	19.8698	19.3011	19.4431	19.3436	19.8741	19.8936	19.7851	2			0.999961	4.89e-08	181.9	84.085	164.92	-0.62484	554220000	1696	7945250	0	267930	553170	0	264880	494190	0
	0.360546	-0.0874615	+	3.37789	-1.00764	+	3.37851	-0.92018	O75179	1699	O75179	O75179	Ankyrin repeat domain-containing protein 17	ANKRD17	S						SNSLSTCTKSGPSPLSSPNGKLTVASPKRGQ	19.4426	19.4433	19.2136	18.2972	18.4658	18.3134	19.394	19.2784	19.1646	2			0.93959	2.04e-05	164.92	81.874	164.92	-0.62484	178070000	1699	4890810	0	0	553170	0	0	494190	0
	0.642887	-0.238389	+	1.20605	0.523253	+	1.68323	0.761642	P42696	14	P42696	P42696	RNA-binding protein 34	RBM34	S				yes		__MALEGMSKRKRKRSVQEGENPDDGVRGSP	18.6273	18.2397	18.3318	18.8514	18.676	19.2412	18.1414	17.9643	18.3779	2			1	8.56e-10	178.77	129.31	128.64	-0.68671	477300000	14	3556800	692.6	317750	0	0	219490	0	0
	0.289402	-0.0686385	+	3.09508	-0.87838	+	5.61303	-0.809742	Q8IUD2	17	Q8IUD2	Q8IUD2	ELKS/Rab6-interacting/CAST family member 1	ERC1	S				yes		YGSARSVGKVEPSSQSPGRSPRLPRSPRLGH	20.9174	21.0102	20.6903	20.0022	20.0171	19.9633	20.8005	20.7838	20.8275	2			0.979767	4.83e-05	157.82	133.52	157.82	0.067245	1084900000	17	14280400	28185.4	288300	1220000	0	295690	1125800	0
	0.910276	0.107142	+	4.13112	-1.04738	+	3.96095	-1.15453	Q9NZN8	170	Q9NZN8	Q9NZN8	CCR4-NOT transcription complex subunit 2	CNOT2	S						TNSMSSSGLGSPNRSSPSIICMPKQQPSRQP	18.4605	18.4054	18.3795	17.483	17.3143	17.306	18.4975	18.4518	18.6177	3			0.8321	1.63e-10	135.7	118.76	135.7	-0.24033	207950000	170	2674520	0	0	283650	0	0	245450	0
	0.539116	-0.0574837	+	2.12708	-0.28416	+	2.33025	-0.226676	Q7RTP6	1704	Q7RTP6	Q7RTP6	Protein-methionine sulfoxide oxidase MICAL3	MICAL3	S						SEGSSGKSKKRSSLFSPRRNKKEKKSKGEGR	16.497	16.42	16.3449	16.0812	16.1242	16.204	16.3969	16.3486	16.344	3			0.99999	0.0129896	70.399	50.069	70.399	0.5227	26814000	1704	735475	0	74616	0	0	64346	0	0
	1.68896	-0.360062	+	2.26486	-0.677584	+	1.43957	-0.317523	O75179	1709	O75179	O75179	Ankyrin repeat domain-containing protein 17	ANKRD17	S				yes		GPSPLSSPNGKLTVASPKRGQKREEGWKEVV	21.8514	22.1097	21.8628	21.3697	21.3385	21.083	21.533	21.6765	21.5342	2			0.999937	0.0017112	140.05	81.624	140.05	-0.47638	1048400000	1709	28644500	0	2846900	0	0	2983600	0	0
	0.0456064	-0.017553	+	3.18898	1.18831	+	4.39232	1.20586	P42858	1874	P42858	P42858	Huntingtin	HTT	S						KRHSLSSTKLLSPQMSGEEEDSDLAAKLGMC	15.1403	14.9497	15.3642	16.3585	16.3779	16.2826	15.0383	15.1362	15.227	2			0.999866	0.00017853	100.77	81.698	100.77	-1.6425	110890000	1874	484967	0	29653	0	0	23877	0	0
	0.757526	-0.0613918	+	3.009	-0.328138	+	2.26964	-0.266746	Q8N9T8	171	Q8N9T8	Q8N9T8	Protein KRI1 homolog	KRI1	S						EQKQLKESFRAFVEDSEDEDGAGEGGSSLLQ	19.9945	19.9495	19.9957	19.7163	19.5972	19.6418	19.8582	19.9759	19.9214	2			1	7.25e-29	243.97	219.67	203.56	0.34365	4723600000	171	8614440	6792	805220	0	0	695240	0	0
	0.090015	0.107004	+	1.53942	0.859185	+	0.919496	0.752182	P43355	77	P43355	P43355	Melanoma-associated antigen 1	MAGEA1	S						SAFPTTINFTRQRQPSEGSSSREEEGPSTSC	11.684	11.4702	12.2192	12.3934	12.7973	12.7603	12.2654	11.1788	12.2503	3			0.99101	0.000896635	74.144	58.982	74.144	-0.014093	75802000	77	43769.2	0	2826.2	0	0	2285.6	0	0
	0.212738	-0.0506757	+	1.83722	-0.331142	+	2.04899	-0.280466	O95817	173	O95817	O95817	BAG family molecular chaperone regulator 3	BAG3	S				yes		AAAQPPASHGPERSQSPAASDCSSSSSSASL	19.5783	19.4688	19.3167	19.1734	19.1121	19.0847	19.5093	19.3581	19.3444	2			0.997395	1.63e-97	371.75	349.38	371.75	-0.47112	6616300000	173	5984520	6175.8	606710	0	0	502770	0	0
	0.157034	0.0459493	+	1.90994	-0.730109	+	2.04519	-0.776058	Q5VUA4	173	Q5VUA4	Q5VUA4	Zinc finger protein 318	ZNF318	S						CVSTPERRRLSDRLGSPVDNLEDMDRDDLTD	16.3741	16.6555	16.5586	15.7592	16.0713	15.5674	16.533	16.716	16.4771	3			1	2.99e-37	250.15	215.92	250.15	0.36734	519370000	173	747817	0	68634	0	0	75422	0	0
	0.306428	0.133542	+	1.59795	0.590451	+	2.78155	0.456909	P45974	783	P45974	P45974	Ubiquitin carboxyl-terminal hydrolase 5	USP5	S				yes		AEAAMDISEGRSAADSISESVPVGPKVRDGP	17.7568	17.219	17.6819	18.1761	18.1476	18.1053	17.721	17.5747	17.7625	2			0.99718	2.85e-23	249.36	196.84	202.4	-1.1348	176820000	783	2156170	3041.9	175770	0	0	110290	0	0
	0.122525	-0.0390342	+	1.86817	-0.338789	+	1.53835	-0.299755	Q96L91	1732	Q96L91	Q96L91	E1A-binding protein p400	EP400	S						NALAVGEPGTASKPASPIGGPTQEEKTRLLK	15.8372	16.0969	16.0231	15.6065	15.651	15.6834	15.781	16.0757	15.9835	3			0.990411	3.28e-08	112.73	94.015	112.73	1.5714	177430000	1732	540869	0	47636	0	0	51750	0	0
	0.107786	0.0167465	+	2.21509	-0.247694	+	2.38213	-0.264441	Q3V6T2	1736	Q3V6T2	Q3V6T2	Girdin	CCDC88A	S						LGKDKPVSCGLARSVSGKTPGDFYDRRTTKP	20.2236	20.3236	20.1873	19.9947	20.038	19.9587	20.2021	20.2487	20.3339	4			0.987016	2.23e-05	148.36	122.21	148.36	-0.10873	839020000	1736	10757300	19255	941000	0	0	894720	0	0
	1.1585	-0.314201	+	1.23672	0.394344	+	2.61172	0.708545	P46087	58	P46087	P46087	Probable 28S rRNA (cytosine(4447)-C(5))-methyltransferase	NOP2	S						LSSRARKRAAKRRLGSVEAPKTNKSPEAKPL	17.5693	17.7602	17.3519	17.8193	17.9141	18.131	17.2005	17.195	17.3432	3			1	0.00534936	110.38	77.967	83.314	-0.037934	91615000	58	1848060	0	154720	0	0	158860	0	0
	1.34991	-0.0967999	+	3.30546	0.323794	+	4.09224	0.420594	P46934	670	P46934	P46934	E3 ubiquitin-protein ligase NEDD4	NEDD4	S						IQLQAQRAFTTRRQISEETESVDNRESSENW	13.7853	13.7258	13.6934	14.0663	14.0278	14.0818	13.6573	13.6588	13.5981	2			0.934498	0.0368731	45.864	32.46	45.864	0.80035	0	670	132062	0	11799	0	0	10461	0	0
	0.463474	0.181553	+	3.22368	-1.22369	+	2.6481	-1.40524	Q9HCD6	1744	Q9HCD6	Q9HCD6	Protein TANC2	TANC2	S			yes			CHSKLDLERSSSQLGSPDVSHLIRRPISVNP	15.4965	15.5568	15.4171	14.4606	14.2843	14.0545	15.8883	15.7776	15.3492	3			0.999988	2.25e-05	136.68	107.35	136.68	-0.50181	46175000	1744	353763	0	37783	0	0	35954	0	0
	0.830476	0.0928542	+	4.37053	2.44835	+	4.34921	2.35549	P46940	1443	P46940	P46940	Ras GTPase-activating-like protein IQGAP1	IQGAP1	S			yes	yes		AIRDAKTPDKMKKSKSVKEDSNLTLQEKKEK	17.5415	17.6474	17.6804	20.118	20.2518	19.8446	17.6572	17.7308	17.7597	3			0.995427	0.000490812	100.39	68.588	43.184	0.050025	288560000	1443	4911210	1429	151820	0	0	147230	0	0
	0.510329	0.123492	+	2.38889	-1.20535	+	2.70764	-1.32884	P15924	176	P15924	P15924	Desmoplakin	DSP	S						VRRASSKGGGGYTCQSGSGWDEFTKHVTSEC	17.7097	17.6237	17.9476	16.6938	16.7718	16.1995	17.9109	17.7996	17.9411	2			0.79698	1.35e-05	120.24	101.62	120.24	1.9509	472750000	176	1685670	3996.9	170230	0	0	144890	0	0
	0.175403	-0.0698067	+	2.37261	0.912087	+	4.01049	0.981894	P47712	727	P47712	P47712	Cytosolic phospholipase A2;Phospholipase A2;Lysophospholipase	PLA2G4A	S				yes		MVESIEYRRQNPSRCSVSLSNVEARRFFNKE	14.6625	14.27	14.1863	15.2772	15.1991	15.3788	14.3671	14.246	14.2963	3			0.959041	0.00309462	78.088	50.119	78.088	1.3252	52520000	727	251982	0	21426	0	0	15098	0	0
+	1.83176	2.00929	+	2.11705	2.4772	+	1.2148	0.467912	P47712	729	P47712	P47712	Cytosolic phospholipase A2;Phospholipase A2;Lysophospholipase	PLA2G4A	S				yes		ESIEYRRQNPSRCSVSLSNVEARRFFNKEFL	16.0119	16.7529	17.6603	19.3437	19.5023	19.0108	18.7594	18.6657	19.028	2			0.861894	1.67e-24	281.76	210.24	281.76	-0.32176	1078100000	729	4016770	0	53646	0	0	80544	0	0
	0.301596	-0.0639528	+	1.69037	-0.326979	+	2.26697	-0.263026	Q15154	1765	Q15154	Q15154	Pericentriolar material 1 protein	PCM1	S						QTQTSEVYDGPKNVRSDISDQEEDEESEGCP	17.229	17.4982	17.3053	16.9532	17.0209	17.0775	17.2231	17.3332	17.2843	3			1	4.6e-12	146.88	134.2	146.88	0.74856	286680000	1765	1381860	1505	0	122750	0	0	133130	0
	0.301596	-0.0639528	+	1.69037	-0.326979	+	2.26697	-0.263026	Q15154	1768	Q15154	Q15154	Pericentriolar material 1 protein	PCM1	S						TSEVYDGPKNVRSDISDQEEDEESEGCPVSI	17.229	17.4982	17.3053	16.9532	17.0209	17.0775	17.2231	17.3332	17.2843	3			1	4.6e-12	146.88	134.2	146.88	0.74856	286680000	1768	1381860	1505	0	122750	0	0	133130	0
	1.43608	0.139708	+	1.99409	-0.585143	+	2.42309	-0.724851	P52594	177	P52594	P52594	Arf-GAP domain and FG repeat-containing protein 1	AGFG1	T						SLLGDSAPTLHLNKGTPSQSPVVGRSQGQQQ	21.2449	21.0919	21.1533	20.7475	20.6399	20.3472	21.3119	21.2864	21.3109	4			0.999963	4.39e-64	298.28	275	298.28	0.21655	1836200000	177	19695800	49252	0	1884700	0	0	1502100	0
	1.10558	-0.217354	+	2.82589	1.68149	+	3.02381	1.89885	P48634	456	P48634	P48634	Protein PRRC2A	PRRC2A	S						APEDEDEAWRQRRKQSSSEISLAVERARRRR	13.8179	13.9491	14.0406	15.3081	15.5333	16.0106	13.6487	13.8507	13.6562	3			0.83239	0.00901752	67.646	33.268	67.646	-0.47596	46149000	456	256305	0	12064	0	0	12160	0	0
	1.05221	-0.0953051	+	2.6237	-0.40943	+	2.74994	-0.314125	Q8N5I9	178	Q8N5I9	Q8N5I9	Uncharacterized protein C12orf45	C12orf45	S				yes		LPNSEGGKGKIEVLDSPASKKKK________	20.7302	20.6849	20.5868	20.283	20.3152	20.1755	20.5668	20.5809	20.5684	2			0.999734	5.79e-05	169.09	128.37	130.15	0.82547	1135100000	178	13470600	12315	1328100	0	0	1141600	0	0
	0.649861	0.449685	+	1.88138	1.22802	+	1.97559	0.778339	P49585;Q9Y5K3	233;233	P49585	P49585	Choline-phosphate cytidylyltransferase A;Choline-phosphate cytidylyltransferase B	PCYT1A;PCYT1B	S						RRNLQRGYTAKELNVSFINEKKYHLQERVDK	13.2324	12.6126	13.5508	14.2786	14.5336	14.2677	13.7021	13.2868	13.756	2			1	0.000559634	134.21	91.812	134.21	-1.2185	17821000	233	133424	0	8100.9	0	0	4937.8	0	0
	0.919582	-0.0507587	+	1.60998	0.337909	+	1.76984	0.388668	P49790	338	P49790	P49790	Nuclear pore complex protein Nup153	NUP153	S			yes			ADAKRIPSIVSSPLNSPLDRSGIDITDFQAK	15.9415	15.9459	15.9704	16.1434	16.258	16.4701	15.9351	15.9156	15.8549	2			0.99999	0.000404513	121.82	92.912	121.82	-0.13264	116300000	338	629150	0	0	51137	0	0	46740	0
	0.0831873	0.0462364	+	1.21263	0.53011	+	2.23002	0.483874	P49790	369	P49790	P49790	Nuclear pore complex protein Nup153	NUP153	T			yes			REKVDSQYPPVQRLMTPKPVSIATNRSVYFK	15.9798	15.3323	15.7686	16.0821	16.3446	16.2444	15.6688	15.7187	15.832	2			0.996137	0.0241459	77.776	61.522	77.776	0.56144	136650000	369	570435	0	52488	0	0	30904	0	0
	1.48771	-0.494303	+	2.48483	1.69606	+	3.21937	2.19036	P49790	614	P49790	P49790	Nuclear pore complex protein Nup153	NUP153	S			yes	yes		PAEILKEGSVLDILKSPGFASPKIDSVAAQP	17.1195	16.6438	16.6801	18.2823	18.294	18.9553	16.3553	16.3023	16.3029	2			0.999937	7.55e-08	176.83	148.2	176.83	0.54607	199370000	614	1872150	0	113950	0	0	74828	0	0
	1.43608	0.139708	+	1.99409	-0.585143	+	2.42309	-0.724851	P52594	179	P52594	P52594	Arf-GAP domain and FG repeat-containing protein 1	AGFG1	S						LGDSAPTLHLNKGTPSQSPVVGRSQGQQQEK	21.2449	21.0919	21.1533	20.7475	20.6399	20.3472	21.3119	21.2864	21.3109	4			0.799157	4.39e-64	298.28	275	227.59	0.37929	1836200000	179	19695800	49252	0	1884700	0	0	1502100	0
	0.519253	-0.0767218	+	2.63884	-0.380793	+	1.65027	-0.304071	Q86UX6	18	Q86UX6	Q86UX6	Serine/threonine-protein kinase 32C	STK32C	S						SGAERRGSSAAASPGSPPPGRARPAGSDAPS	15.8087	15.7819	15.8125	15.5284	15.3736	15.3588	15.7118	15.8412	15.62	3			0.999682	0.000341335	105.19	86.519	78.359	-0.082307	76371000	18	465935	0	46723	0	0	41849	0	0
	0.298379	0.0634638	+	4.47439	0.546352	+	2.30645	0.482889	P49840	21	P49840	P49840	Glycogen synthase kinase-3 alpha	GSK3A	S			yes			PSGGGPGGSGRARTSSFAEPGGGGGGGGGGP	18.9682	18.9082	18.9101	19.5099	19.466	19.4496	18.9883	19.1398	18.8487	2			0.818078	2.83e-62	281.83	250.02	173.59	0.15568	2637600000	21	5426030	12806	400620	0	0	344510	0	0
	0.334738	0.0727997	+	2.56015	-0.556569	+	3.88491	-0.629369	Q14814	180	Q14814	Q14814	Myocyte-specific enhancer factor 2D	MEF2D	S						TPSLVTSSLTDPRLLSPQQPALQRNSVSPGL	17.2841	17.1722	17.0034	16.5645	16.5868	16.6387	17.2858	17.1575	17.2348	2			1	2.15e-06	166.62	113.29	166.62	-0.014561	155880000	180	1197400	293.93	127440	0	0	106860	0	0
	0.250727	0.107084	+	1.53787	0.581914	+	2.80664	0.47483	P49841	9	P49841	P49841	Glycogen synthase kinase-3 beta	GSK3B	S			yes			_______MSGRPRTTSFAESCKPVQQPSAFG	17.5896	17.0226	17.3933	17.8362	18.0171	17.8979	17.3796	17.4852	17.4618	3			0.818374	1.61e-13	160.47	141.43	160.47	-0.39323	1667200000	9	1834210	0	156870	0	0	96604	0	0
	0.425018	-0.179729	+	1.50048	0.607506	+	3.6156	0.787235	P50548	185	P50548	P50548	ETS domain-containing transcription factor ERF	ERF	S						SSLFSAVVARRLGRGSVSDCSDGTSELEEPL	16.3723	15.7872	15.9074	16.5375	16.6176	16.7342	15.8872	15.8484	15.7921	3			0.976106	8.22e-28	214.29	183.12	214.29	0.45338	184670000	185	700983	573.49	68547	0	0	41997	0	0
	1.46402	-0.197681	+	2.87175	0.343067	+	3.09389	0.540748	P50548	526	P50548	P50548	ETS domain-containing transcription factor ERF	ERF	T				yes		KKVRGEGPGEAGGPLTPRRVSSDLQHATAQL	18.1519	18.0719	18.0388	18.4161	18.3929	18.4828	17.9904	17.8111	17.8681	3			1	4.11e-09	194	150.91	126.25	0.17086	629110000	526	2679940	1828.3	229950	0	0	196010	0	0
	0.189572	0.200747	+	1.67865	1.80931	+	1.57458	1.60856	P50548	531	P50548	P50548	ETS domain-containing transcription factor ERF	ERF	S						EGPGEAGGPLTPRRVSSDLQHATAQLSLEHR	13.4348	12.8831	13.9327	15.4226	14.4834	15.7725	14.1212	13.2022	13.5294	4			0.934791	5.8e-18	206.96	190.53	206.96	0.071944	42742000	531	210006	0	9296.5	0	0	5926.4	0	0
+	1.74606	1.20883	+	3.31835	2.22831	+	1.62178	1.01948	P51532	1382	P51532	P51532	Transcription activator BRG1	SMARCA4	S						FGRGSRHRKEVDYSDSLTEKQWLKAIEEGTL	16.0583	16.0963	16.5982	18.5427	18.6562	18.2388	17.5191	16.9842	17.8759	2			0.943656	4.7e-18	264.61	181.53	264.61	0.19656	205760000	1382	2033100	0	55364	0	0	51731	0	0
	1.90186	-0.151566	+	3.58883	-0.734247	+	3.44457	-0.58268	Q9BXB4	181	Q9BXB4	Q9BXB4	Oxysterol-binding protein-related protein 11	OSBPL11	S				yes		PPLKSRSFSLASSSNSPISQRRPSQNAISFF	20.2373	20.2303	20.1356	19.5354	19.4964	19.3686	20.0474	20.0724	20.0286	2			0.999997	3.63e-79	380.17	308.64	346.12	-0.30689	2143400000	181	8980290	7112.6	949780	0	0	840180	0	0
	0.0989624	0.0224765	+	2.08386	-0.591558	+	2.01214	-0.614035	Q9UPQ9	1816	Q9UPQ9	Q9UPQ9	Trinucleotide repeat-containing gene 6B protein	TNRC6B	S						SLWGVPTVEDPHRMGSPAPLLPGDLLGGGSD	14.2307	14.3804	14.2778	13.5072	13.8994	13.7076	14.449	14.2173	14.29	2			0.999999	0.00605313	69.594	43.551	69.594	0.48514	17057000	1816	162212	293.39	15974	0	0	16265	0	0
	0.746828	-0.462606	+	3.06911	2.77966	+	4.66161	3.24227	P51812	386	P51812	P51812	Ribosomal protein S6 kinase alpha-3	RPS6KA3	S						GIPPSANAHQLFRGFSFVAITSDDESQAMQT	16.4832	15.6284	16.4518	19.1192	19.08	18.703	15.8263	15.676	15.6732	4			0.999999	3.95e-84	321.97	301.21	321.97	0.14112	159500000	386	2083250	0	73917	0	0	37732	0	0
	0.238964	-0.0508792	+	1.58072	-0.318862	+	1.85775	-0.267982	Q8IZP0	183	Q8IZP0	Q8IZP0	Abl interactor 1	ABI1	S				yes		TGTLSRTNPPTQKPPSPPMSGRGTLGRNTPY	20.0673	20.1481	19.8911	19.7337	19.7991	19.6172	19.9188	20.0416	19.9935	3			0.99961	2.36e-05	122.3	94.65	122.3	-0.17385	5336700000	183	8955610	4478.2	846060	0	0	794880	0	0
	1.20387	-0.172248	+	2.62241	-0.47568	+	2.90046	-0.303432	Q8ND56	183	Q8ND56	Q8ND56	Protein LSM14 homolog A	LSM14A	S						QDTRSLKTQLSQGRSSPQLDPLRKSPTMEQA	20.1201	20.3352	20.2604	19.7492	19.819	19.7205	20.1108	20.0565	20.0317	3			0.949979	2.41e-60	276.03	248.45	187.76	-0.31518	943160000	183	9684110	10245	714300	162700	0	733200	168540	0
	0.305535	-0.0627454	+	2.34543	0.255489	+	1.58888	0.318234	P51812	715	P51812	P51812	Ribosomal protein S6 kinase alpha-3	RPS6KA3	S				yes		KGAMAATYSALNRNQSPVLEPVGRSTLAQRR	16.657	16.6806	16.6252	16.9223	16.8327	16.9743	16.6445	16.6996	16.4305	2			1	9.27e-11	223.58	188.04	223.58	0.36045	169150000	715	993406	0	83193	0	0	76707	0	0
	0.111451	0.0200405	+	2.66106	-0.386924	+	3.30361	-0.406965	Q86TB9	184	Q86TB9	Q86TB9	Protein PAT1 homolog 1	PATL1	S				yes		SERALPRRSTSPIIGSPPVRAVPIGTPPKQM	19.2261	19.0448	19.1697	18.7854	18.7397	18.7548	19.1314	19.1283	19.241	2			1	8.22e-06	172.85	119.73	172.85	0.014377	670490000	184	4910150	31323	0	477460	0	0	377750	0
	0.81115	-0.442012	+	3.60187	2.9606	+	5.45566	3.40261	P51812;Q15418	577;573	P51812;Q15418	P51812	Ribosomal protein S6 kinase alpha-3;Ribosomal protein S6 kinase alpha-1	RPS6KA3;RPS6KA1	T				yes		FGFAKQLRAENGLLMTPCYTANFVAPEVLKR	17.8319	17.02	17.5357	20.4743	20.4497	20.3453	16.856	17.1429	17.0626	3			0.999518	7.52e-29	234.83	220.95	234.83	0.13128	703170000	577	5636880	0	184980	0	0	96435	0	0
	1.24289	0.138448	+	2.29888	0.378901	+	1.94492	0.240453	P52272	528	P52272	P52272	Heterogeneous nuclear ribonucleoprotein M	HNRNPM	S			yes			SGVERMGPAIERMGLSMERMVPAGMGAGLER	17.6365	17.7278	17.5659	17.9275	18.0909	18.0485	17.758	17.8283	17.7594	2			1	0.0379473	75.571	25.53	69.338	1.2381	312860000	528	2141780	0	161960	0	0	155430	0	0
+	2.2646	1.64306	+	3.51661	2.30803	+	1.27944	0.664965	P52272	637	P52272	P52272	Heterogeneous nuclear ribonucleoprotein M	HNRNPM	S			yes			AIEMERGNFGGSFAGSFGGAGGHAPGVARKA	15.5632	15.3298	15.9688	17.9293	18.038	17.8187	17.3706	16.8132	17.6073	3			0.999953	9.51e-29	236.6	207.47	236.6	0.31557	170000000	637	1496950	3428.2	39536	0	0	30853	0	0
	0.411902	0.161405	+	1.34938	-0.464271	+	3.74623	-0.625676	Q9P206	185	Q9P206	Q9P206	Uncharacterized protein KIAA1522	KIAA1522	T						VQKELGLRNEREAPGTPRAPGARDAVRIPTV	16.4337	15.9268	15.9834	15.6444	15.632	15.6746	16.3292	16.3121	16.1867	3			1	0.00161484	101.32	79.122	83.087	0.13157	135350000	185	611864	1025	71468	0	0	46141	0	0
	0.627169	-0.165258	+	1.78536	-0.429216	+	2.2261	-0.263958	Q9BYW2	1853	Q9BYW2	Q9BYW2	Histone-lysine N-methyltransferase SETD2	SETD2	T						SEGDGYSSENTSRAHTPLNTPDPSTKLSTEA	20.8585	21.1497	20.8015	20.5074	20.5043	20.5102	20.6804	20.8504	20.7831	3			0.999968	1.03e-08	185.86	160.47	164.01	0.027697	516210000	1853	15913300	59196	1449100	0	0	1561700	0	0
	1.11045	0.384322	+	3.61075	1.78398	+	3.47754	1.39966	P52943	115	P52943	P52943	Cysteine-rich protein 2	CRIP2	S						ERKASGPPKGPSRASSVTTFTGEPNTCPRCS	17.0824	16.6912	17.0616	18.703	18.6264	18.8577	17.2818	17.5244	17.182	2			0.996094	3.53e-54	327.1	283.92	252.12	0.074011	420680000	115	2338920	4523.1	111110	0	0	77258	0	0
	1.4748	-0.193998	+	1.771	0.25446	+	3.97503	0.448458	P52948	623	P52948	P52948	Nuclear pore complex protein Nup98-Nup96;Nuclear pore complex protein Nup98;Nuclear pore complex protein Nup96	NUP98	S						SNLFSPVNRDSENLASPSEYPENGERFSFLS	18.2344	18.1305	18.029	18.3442	18.3806	18.4323	17.9175	17.965	17.9293	3			0.995597	1.03e-35	275.37	234.41	123.95	-0.66351	1575500000	623	2689480	3418.8	243220	0	0	203920	0	0
	0.547332	0.251904	+	2.28782	1.48199	+	1.68717	1.23008	P53365	72	P53365	P53365	Arfaptin-2	ARFIP2	S						GSGDGLIPTGSGRHPSHSTTPSGPGDEVARG	13.496	13.4165	13.3596	15.0844	14.3864	15.2473	14	13.7161	13.3118	3			0.854046	0.0259267	52.432	42.695	52.432	0.29317	46614000	72	176674	0	9691.2	0	0	8491.5	0	0
	0.71933	0.290993	+	2.77149	1.50143	+	3.10264	1.21044	P53367	132	P53367	P53367	Arfaptin-1	ARFIP1	S						IKNPAMEKLELVRKWSLNTYKCTRQIISEKL	18.2998	18.4064	18.8504	19.9147	20.2363	19.9098	18.8475	18.6632	18.9189	3			0.944585	0.00192034	125.54	72.304	125.54	0.018045	419880000	132	6091580	12015	254290	0	0	245600	0	0
	0.145343	0.0234089	+	2.10076	0.346977	+	2.76864	0.323568	P55196	1182	P55196	P55196	Afadin	MLLT4	S				yes		RADHRSSPNVANQPPSPGGKSAYASGTTAKI	17.86	17.8235	17.6713	18.0842	18.2122	18.0994	17.7921	17.7938	17.8392	2			1	1.01e-06	163.41	134.6	163.41	-0.31463	218810000	1182	2277420	2958.5	188550	0	0	165790	0	0
	0.146728	0.0376851	+	2.74314	-0.689629	+	2.32877	-0.727314	Q13424	189	Q13424	Q13424	Alpha-1-syntrophin	SNTA1	S						PYFKNSTGGTSVGWDSPPASPLQRQPSSPGP	15.5993	15.5135	15.5964	14.987	14.9505	14.7028	15.452	15.7681	15.6021	2			0.978938	0.000145882	96.391	78.296	96.391	0.074936	110180000	189	385914	0	40520	0	0	34921	0	0
	0.0239793	-0.00567436	+	1.94715	-0.348214	+	4.39376	-0.342539	Q15365	189	Q15365	Q15365	Poly(rC)-binding protein 1	PCBP1	S						PQGRVMTIPYQPMPASSPVICAGGQDRCSDA	19.2568	19.0212	19.0258	18.7351	18.7677	18.7563	19.0702	19.0955	19.1211	2			0.887376	5.93e-14	172.5	137.81	172.5	0.10221	1260100000	189	4730940	5343.6	487510	0	0	371780	0	0
	0.421673	-0.0954342	+	1.71932	-0.361291	+	1.97305	-0.265857	Q96E09	189	Q96E09	Q96E09	Protein FAM122A	FAM122A	S						PIPSPTTRFTTRRSQSPINCIRPSVLGPLKR	19.2435	19.2546	18.9904	18.7486	18.8796	18.7765	18.9929	19.0667	19.1426	3			0.999787	1.21e-06	150.14	125.42	150.14	-0.39948	690120000	189	4791250	4695.6	483160	0	0	435160	0	0
	0.294715	-0.0464319	+	3.83829	1.22974	+	3.77366	1.27618	P55196	1799	P55196	P55196	Afadin	MLLT4	S				yes		GAPENLTFKERQRLFSQGQDVSNKVKASRKL	14.6577	14.718	14.7884	15.8296	16.0975	15.9262	14.5853	14.7636	14.676	2			0.996632	0.00392759	97.417	66.867	97.417	-1.2823	24540000	1799	363482	0	21357	0	0	20423	0	0
	1.27399	0.112288	+	2.77545	-0.365655	+	3.37491	-0.477943	Q5VUA4	1896	Q5VUA4	Q5VUA4	Zinc finger protein 318	ZNF318	S						QDTPVKISAPELLLHSPARSAMCLTGSPQEQ	17.873	17.9803	17.8977	17.5155	17.5147	17.6238	18.0701	18.0357	17.982	3			1	4e-09	179.74	154.81	153.72	0.48613	93319000	1896	2142770	2012.7	190220	0	0	184270	0	0
	1.08764	-0.30813	+	1.9662	0.865387	+	2.84237	1.17352	P55265	601	P55265	P55265	Double-stranded RNA-specific adenosine deaminase	ADAR	T						HYSTEKESEKTAESQTPTPSATSFFSGKSPV	15.0382	14.6556	15.0346	15.5427	15.7423	16.0396	14.6323	14.5213	14.6504	2			0.895035	7.64e-05	114.29	90.101	105.39	-1.4677	60438000	601	349628	0	27665	0	0	19582	0	0
	0.379567	-0.0511926	+	2.47698	-0.523582	+	2.59396	-0.47239	P30291	190	P30291	P30291	Wee1-like protein kinase	WEE1	T						PHKTFRKLRLFDTPHTPKSLLSKARGIDSSS	21.1597	21.147	20.9995	20.5984	20.6817	20.4554	21.0134	21.0951	21.0441	3			0.999996	0.00247261	140.63	109.4	129.34	-0.30099	439720000	190	17983200	15067	1778600	0	0	1558900	0	0
	0.248008	-0.101267	+	1.39344	-0.622957	+	1.73234	-0.52169	Q00587	190	Q00587	Q00587	Cdc42 effector protein 1	CDC42EP1	S				yes		RDRDGSFPSEPGLRRSDSLLSFRLDLDLGPS	13.1464	13.6977	13.3773	12.5219	12.962	12.8686	13.353	13.2898	13.2747	2			0.99297	0.00194785	140.17	83.359	140.17	-0.51705	19863000	190	84124.6	0	7641	0	0	10264	0	0
+	2.61791	1.19447	+	3.07275	1.77316	+	1.86818	0.578685	P55327	176	P55327	P55327	Tumor protein D52	TPD52	S				yes		ITKKLEDVKNSPTFKSFEEKVENLKSKVGGT	18.2157	18.7657	18.4585	20.2682	20.4467	20.0444	19.5393	19.7894	19.6946	2			1	7.72e-07	171.56	125.7	99.941	-0.25444	841880000	176	7918790	17194	240150	0	0	312940	0	0
	0.92653	-0.0629183	+	3.50308	-0.362605	+	3.304	-0.299687	Q15365	190	Q15365	Q15365	Poly(rC)-binding protein 1	PCBP1	S						QGRVMTIPYQPMPASSPVICAGGQDRCSDAA	20.7815	20.7285	20.81	20.4191	20.4406	20.3724	20.7485	20.7063	20.6764	2			0.999836	2.68e-37	266.53	244	266.53	-0.46109	5577500000	190	14832300	16764	1375200	0	0	1175600	0	0
	0.332365	0.112647	+	2.03739	0.436895	+	1.41604	0.324248	P56749	231	P56749	P56749	Claudin-12	CLDN12	S						SMHTYSQPYSARSRLSAIEIDIPVVSHTT__	17.0478	16.7311	16.8882	17.3234	17.3525	17.302	17.1584	16.8007	17.046	3			0.933355	7.56e-36	271.43	257.27	271.43	-0.018503	171420000	231	1288090	2122.1	108520	0	0	79369	0	0
	1.29541	-0.114756	+	2.81456	0.316254	+	4.13227	0.43101	P57740	11	P57740	P57740	Nuclear pore complex protein Nup107	NUP107	S						_____MDRSGFGEISSPVIREAEVTRTARKQ	19.7098	19.5961	19.601	19.9192	19.9797	19.9567	19.5114	19.5568	19.4944	2			0.991166	2.1e-13	239.35	152.35	161.87	0.1672	540570000	11	7921990	2864.4	663420	0	0	547850	0	0
	0.628967	-0.0731134	+	2.4884	-0.327284	+	2.71948	-0.25417	Q8IUI4;Q8TEQ0	191;344	Q8IUI4	Q8IUI4	Putative protein SNX29P2;Sorting nexin-29	SNX29P2;SNX29	S						LSLNREFGYQKLDVKSIDDEDVDENEDDVYG	15.4556	15.6027	15.4767	15.168	15.2323	15.1529	15.4099	15.417	15.4886	3			1	4.17e-23	194.98	183.78	194.98	0.55387	57224000	191	385421	0	36746	0	0	37084	0	0
	1.40847	0.265296	+	2.14776	-0.466343	+	3.29773	-0.731639	Q5VV41	191	Q5VV41	Q5VV41	Rho guanine nucleotide exchange factor 16	ARHGEF16	S						KLQALAEEPSQPHTRSPAKNKKTLGRKRGHK	16.4699	16.3395	16.5975	16.0389	15.8966	16.0724	16.7475	16.8072	16.6481	3			0.970116	3.56e-05	106.75	90.032	106.75	-0.093058	378320000	191	807269	0	73255	0	0	60947	0	0
	0.0184761	-0.00663503	+	1.53695	0.365356	+	2.2508	0.371991	P57740	86	P57740	P57740	Nuclear pore complex protein Nup107	NUP107	S						LRQPDISCILGTGGKSPRLTQSSGFFGNLSM	20.3081	19.9929	20.0004	20.3958	20.5067	20.4949	19.9841	20.1115	20.1859	3			0.999813	2.05e-08	162.72	141.75	162.72	0.27009	1148900000	86	11401300	5849.5	996660	0	0	715900	0	0
	0.449068	-0.0593656	+	2.56352	0.26565	+	2.10346	0.325015	P57764	252	P57764	P57764	Gasdermin-D	GSDMD	S						QRTFQPPATGHKRSTSEGAWPQLPSGLSMMR	16.1335	16.1524	16.1879	16.3714	16.495	16.4044	16.0701	16.2041	16.0215	2			0.998498	1.78e-17	212.9	179.59	212.9	-0.10478	130380000	252	705947	617.22	58270	0	0	53723	0	0
	0.467275	-0.374537	+	2.8604	2.12904	+	3.1807	2.50357	P58107	1543	P58107	P58107	Epiplakin	EPPK1	T						VSARDLFRAQLISRKTLDELSQGTTTVKEVA	15.8737	16.7217	16.1517	18.4473	18.5067	18.1803	15.8866	16.2855	15.4514	3			0.999994	6.1e-05	127.17	110.51	127.17	0.037867	81739000	1543	1531770	0	48834	0	0	78864	0	0
	0.0126983	0.012242	+	1.44547	0.747211	+	1.05586	0.734969	P58107	2716	P58107	P58107	Epiplakin	EPPK1	S						ERLSKVSFRGLRRQVSASELHTSGILGPETL	20.6052	20.3675	20.0476	21.3375	20.7434	21.181	20.8645	20.2676	19.9249	3			0.999593	3.24e-62	326.48	294.3	326.48	0.83308	5123400000	2716	15583100	10277	1219800	0	0	921620	0	0
+	2.20799	0.601294	+	4.97797	3.10788	+	4.45875	2.50658	P62328	23	P62328	P62328	Thymosin beta-4;Hematopoietic system regulatory peptide	TMSB4X	T						AEIEKFDKSKLKKTETQEKNPLPSKETIEQE	18.6838	18.9339	18.7812	21.9697	22.0169	21.7359	19.4798	19.4972	19.2257	4			0.987982	7.14e-08	148.26	119.93	148.26	0.30707	618200000	23	16757400	0	330190	0	0	350530	0	0
	2.25081	-0.292902	+	2.61291	-0.636116	+	1.50572	-0.343214	Q86TB9	194	Q86TB9	Q86TB9	Protein PAT1 homolog 1	PATL1	T						SPIIGSPPVRAVPIGTPPKQMAVPSFTQQIL	19.2151	19.1662	19.1647	18.4856	18.7266	18.4255	18.8495	18.8267	18.9911	2			1	0.0328175	96.946	62.868	96.946	-0.12191	97307000	194	4352540	0	473880	0	0	409990	0	0
	0.0669873	-0.0284818	+	3.33573	-1.53824	+	2.97727	-1.50976	O75179	1940	O75179	O75179	Ankyrin repeat domain-containing protein 17	ANKRD17	S						GPFPVRPLSPARATNSPKPHMVPRHSNQNSS	18.0815	18.347	18.2026	16.8761	16.6937	16.4466	18.2854	18.3308	17.9294	3			0.998732	9.86e-05	132.84	116.09	132.84	-0.25464	293910000	1940	2093900	5920.7	219200	0	0	235960	0	0
	0.537965	0.0952549	+	2.88697	-0.601737	+	4.3812	-0.696992	Q9H2D6	1955	Q9H2D6	Q9H2D6	TRIO and F-actin-binding protein	TRIOBP	S						RQALDYVELSPLTQASPQRARTPARTPDRLA	17.8352	17.6999	17.5855	17.1446	17.0837	17.087	17.8569	17.7536	17.7959	2			1	1.5e-51	299.47	267.13	299.47	-0.5927	325910000	1955	1758390	4738.5	185390	0	0	152530	0	0
	0.566808	0.276116	+	1.84389	-0.579339	+	1.61657	-0.855454	Q9Y619;Q9BXI2	196;196	Q9Y619	Q9Y619	Mitochondrial ornithine transporter 1;Mitochondrial ornithine transporter 2	SLC25A15;SLC25A2	S						VPGYFFFFGGYELSRSFFASGRSKDELGPVP	15.0077	14.9669	14.8039	14.3552	14.126	14.5593	14.8517	15.5693	15.1859	2			0.992836	0.0418671	62.338	26.293	62.338	0.22014	0	196	273606	0	27097	0	0	24155	0	0
	0.492327	-0.110813	+	2.89194	0.676296	+	2.44023	0.787109	P78347	210	P78347	P78347	General transcription factor II-I	GTF2I	S						VGGRVMVTDADRSILSPGGSCGPIKVKTEPT	16.6222	16.6405	16.6241	17.2757	17.1774	17.4626	16.5531	16.3337	16.6675	2			0.9997	3.96e-09	185.95	146.21	185.95	-0.09412	114920000	210	1108080	282.01	81246	0	0	74665	0	0
	0.772936	-0.0742226	+	2.49647	-0.272893	+	2.71282	-0.198671	Q9BW71	196	Q9BW71	Q9BW71	HIRA-interacting protein 3	HIRIP3	S						APGKASVSRKQAREESEESEAEPVQRTAKKV	21.5801	21.5335	21.4466	21.2617	21.2686	21.2112	21.406	21.4562	21.4753	3			1	9.26e-30	290.64	257.55	128.55	-0.22755	2624400000	196	25322300	70296	271450	2095800	0	376050	1647000	0
	0.443282	0.109447	+	1.75148	-0.278165	+	1.6343	-0.387611	Q9Y4B5	196	Q9Y4B5	Q9Y4B5	Microtubule cross-linking factor 1	MTCL1	S						ARIPAVTLAVTSVAGSPARCSRISHTDSSSD	13.7935	13.734	13.8985	13.5376	13.6184	13.4354	13.8492	13.8001	14.105	2			0.970276	0.000415872	98.227	68.538	98.227	0.30668	57287000	196	126012	0	11865	0	0	10518	0	0
	1.65854	-0.274003	+	1.72873	0.351622	+	2.7662	0.625624	P78362	494	P78362	P78362	SRSF protein kinase 2;SRSF protein kinase 2 N-terminal;SRSF protein kinase 2 C-terminal	SRPK2	S						EQEESSPSHDRSRTVSASSTGDLPKAKTRAA	19.1945	19.0803	18.9885	19.3366	19.4086	19.573	18.803	18.7401	18.8982	2			0.998204	2.11e-22	201.09	138.27	188.19	1.1514	142540000	494	5309670	0	52808	414510	0	44104	342800	0
	1.16075	-0.387461	+	1.96185	0.918265	+	2.48689	1.30573	P82094	77	P82094	P82094	TATA element modulatory factor	TMF1	S				yes		WGLKSNTEPQSPPIASPKAITKPVRRTVVDE	15.464	15.3443	15.0965	15.9895	16.1102	16.56	14.966	14.6965	15.0799	2			0.999984	7e-05	139.67	103.96	139.67	-0.3856	53864000	77	463366	0	36957	0	0	31155	0	0
	0.013579	-0.00285784	+	4.59197	2.22161	+	5.01146	2.22447	P98082	723	P98082	P98082	Disabled homolog 2	DAB2	S				yes		LNKINEPPKPAPRQVSLPVTKSTDNAFENPF	14.9012	15.0903	14.8833	17.1991	17.0386	17.302	14.9498	14.9215	14.9949	2			0.999875	0.0109544	98.105	63.874	98.105	-2.3727	52816000	723	680663	0	25203	0	0	26251	0	0
	0.10772	-0.0271047	+	1.66247	-0.438651	+	1.59815	-0.411546	Q8NEY1	199	Q8NEY1	Q8NEY1	Neuron navigator 1	NAV1	S						PLSKAPEAAVSEDGKSDDELLSSKAKAQKSS	17.5906	17.7966	17.6068	17.225	17.4002	17.0528	17.5301	17.7459	17.6365	3			0.999921	9.13e-25	237.13	215.24	237.13	0.29539	236870000	199	1703830	7501.3	156980	0	0	162810	0	0
	0.163232	-0.0251239	+	2.11677	-0.29857	+	1.84135	-0.273446	Q92673	1991	Q92673	Q92673	Sortilin-related receptor	SORL1	Y			yes			TDRSYKVKSRNSTVEYTLNKLEPGGKYHIIV	14.8592	14.9376	14.8145	14.5637	14.4929	14.6589	14.8963	14.7548	14.8848	2			0.999938	0.0400316	47.603	29.783	47.603	4.3302	16254000	1991	252435	196.71	0	0	24493	0	0	23682
	0.163232	-0.0251239	+	2.11677	-0.29857	+	1.84135	-0.273446	Q92673	1992	Q92673	Q92673	Sortilin-related receptor	SORL1	T			yes			DRSYKVKSRNSTVEYTLNKLEPGGKYHIIVQ	14.8592	14.9376	14.8145	14.5637	14.4929	14.6589	14.8963	14.7548	14.8848	2			0.999939	0.0400316	47.603	29.783	47.603	4.3302	16254000	1992	252435	196.71	0	0	24493	0	0	23682
	1.08609	0.336588	+	2.34689	0.781446	+	1.96966	0.444858	P98168;P98169	34;34	P98168	P98168	Zinc finger X-linked protein ZXDA;Zinc finger X-linked protein ZXDB	ZXDA;ZXDB	S						GGIPAGGGRVHRGPDSPAGQVPTRRLLLPRG	13.7479	13.3263	13.5024	14.247	14.2497	14.4243	13.9371	13.9456	13.7037	4			1	3.91e-05	114.02	95.882	114.02	-0.11938	29961000	34	145718	0	11503	0	0	7990.2	0	0
	0.720465	-0.22293	+	2.74901	-1.48273	+	2.79824	-1.2598	P31350	20	P31350	P31350	Ribonucleoside-diphosphate reductase subunit M2	RRM2	S				yes		RVPLAPITDPQQLQLSPLKGLSLVDKENTPP	18.1896	17.8111	17.7989	16.3543	16.7521	16.245	17.8187	17.6122	17.7	2			1	4.08e-13	197.45	168.64	197.45	0.34518	289150000	20	1630930	0	235930	0	0	164400	0	0
	0.148623	-0.0514901	+	1.43232	-0.381511	+	3.0737	-0.330021	Q13424	200	Q13424	Q13424	Alpha-1-syntrophin	SNTA1	S						VGWDSPPASPLQRQPSSPGPTPRNFSEAKHM	15.4401	15.7509	15.3396	15.1302	15.1193	15.1366	15.4967	15.4933	15.3861	2			0.834701	0.00108469	124.12	91.804	124.12	0.22721	32971000	200	382525	0	36362	0	0	40981	0	0
	0.427389	0.069945	+	2.31082	0.396437	+	3.02951	0.326492	P98174	365	P98174	P98174	FYVE, RhoGEF and PH domain-containing protein 1	FGD1	S				yes		EKDREIPVPLMERQESVELTVQQKVFHIANE	17.1866	17.3944	17.2152	17.6122	17.7049	17.6684	17.3507	17.3701	17.2851	2			0.999973	1.1e-07	180.06	137.25	125.5	0.50581	98071000	365	1629910	2069.1	119260	0	0	124130	0	0
	0.998973	0.196344	+	2.23208	0.512713	+	2.43673	0.316369	P98174	48	P98174	P98174	FYVE, RhoGEF and PH domain-containing protein 1	FGD1	S						SDPGASEPGLLARRGSGSALGGPLDPQFVGP	18.1531	18.287	18.4523	18.8302	18.7314	18.869	18.5428	18.4341	18.5046	4			0.954457	9.9e-42	232.13	210.14	232.13	0.0062151	522040000	48	3587930	9768.1	230150	0	0	226610	0	0
	0.51395	0.128312	+	1.79819	0.583921	+	1.71692	0.455608	P98174	82	P98174	P98174	FYVE, RhoGEF and PH domain-containing protein 1	FGD1	S						SLGAAPGHRVLPCGPSPQHHRALRFSYHLEG	17.1401	17.0169	16.8087	17.478	17.4504	17.789	17.2116	17.1036	17.0354	3			1	2.04e-05	151.59	122.62	151.59	-0.11213	122140000	82	1453890	1814.3	115550	0	0	96238	0	0
	0.00579441	-0.00197283	+	3.06016	0.665785	+	2.74121	0.667758	Q00537	137	Q00537	Q00537	Cyclin-dependent kinase 17	CDK17	S						SPTGVCLRNRIHRRISMEDLNKRLSLPADIR	18.9327	19.1624	18.9806	19.7204	19.713	19.6396	18.9435	19.197	18.9293	3			1	0.00016777	170.66	115.31	46.206	-0.4511	305180000	137	5934240	9542.2	391090	0	0	408930	0	0
	0.448231	-0.0751712	+	2.99178	0.4944	+	3.25983	0.569571	Q00537	180	Q00537	Q00537	Cyclin-dependent kinase 17	CDK17	S						SPPFDQPMSRRSRRASLSEIGFGKMETYIKL	18.8537	18.8924	18.7219	19.3131	19.2745	19.3636	18.6534	18.8259	18.7632	2			0.963495	0.000686472	112.02	56.043	94.09	-0.65053	318780000	180	4798380	1919.6	370630	0	0	340850	0	0
	0.210925	0.236773	+	0.991227	0.974662	+	1.54623	0.73789	Q00839	192	Q00839	Q00839	Heterogeneous nuclear ribonucleoprotein U	HNRNPU	S						RGAAKEAAGKSSGPTSLFAVTVAPPGARQGQ	15.0087	13.8892	15.2559	15.83	15.9292	15.3186	15.0628	14.7305	15.0708	2			0.982645	1.59e-07	137.19	122.98	137.19	-0.53459	46913000	192	355367	0	27115	0	0	11679	0	0
	0.994138	-0.199099	+	1.92117	-0.397702	+	2.8353	-0.198603	Q13595	202	Q13595	Q13595	Transformer-2 protein homolog alpha	TRA2A	T				yes		GRRIRVDYSITKRAHTPTPGIYMGRPTHSGG	21.9002	22.06	21.7457	21.5159	21.5074	21.4896	21.7511	21.6837	21.6738	3			0.999954	1.75e-117	364.73	353.21	132.51	-0.18559	19627000000	202	30965900	56125	2943000	0	0	2885400	0	0
	0.0555499	0.0117296	+	1.98606	-0.261436	+	2.10698	-0.273165	Q86X95	202	Q86X95	Q86X95	Corepressor interacting with RBPJ 1	CIR1	S						GRNLTANDPSQEYVASEGEEDPEVEFLKSLT	17.8632	17.9883	17.8109	17.588	17.6666	17.6235	17.8299	17.9973	17.8704	3			1	7.59e-23	188.15	168.9	188.15	-2.0262	186880000	202	2090000	8800.8	188960	0	0	185270	0	0
+	3.03667	1.26921	+	5.30763	3.34151	+	4.37601	2.0723	Q01433	100	Q01433	Q01433	AMP deaminase 2	AMPD2	S				yes		EARGGLGAPPLQSARSLPGPAPCLKHFPLDL	16.9736	17.3073	17.2043	20.5357	20.5082	20.4658	18.4098	18.2603	18.6227	2			1	0.000204949	149.96	83.66	149.96	-0.53078	547240000	100	6559170	0	103180	0	0	117050	0	0
+	3.86292	1.58818	+	5.08861	2.53901	+	3.69463	0.950832	Q01433	118	Q01433	Q01433	AMP deaminase 2	AMPD2	S						GPAPCLKHFPLDLRTSMDGKCKEIAEELFTR	18.8639	19.0848	19.1429	21.5522	21.5511	21.6054	20.4804	20.6606	20.7151	3			0.974808	7.17e-10	196.65	173.85	196.65	0.1418	848320000	118	17365300	11264	373210	0	0	388070	0	0
	0.589389	-0.184429	+	2.02904	-0.60756	+	2.72418	-0.423131	Q86SQ0	204	Q86SQ0	Q86SQ0	Pleckstrin homology-like domain family B member 2	PHLDB2	S						GPPPISRSGAASMPSSPKQARKMSIQDSLAL	20.7627	21.0655	20.6324	20.2356	20.2236	20.1787	20.5757	20.7465	20.585	2			0.997331	1.17e-12	226.51	157.17	226.51	0.18471	702400000	204	13993000	1298.8	1357700	0	0	1475500	0	0
	0.931293	-0.0873076	+	2.82828	-0.301577	+	2.48735	-0.21427	Q96JM3	204	Q96JM3	Q96JM3	Chromosome alignment-maintaining phosphoprotein 1	CHAMP1	S						KSVPVCESQKLAPVPSPEPQKPAPVSPESVK	19.3491	19.4248	19.31	19.054	19.0957	19.0294	19.2298	19.2662	19.3259	4			1	5.43e-13	162.91	149.82	162.91	-0.021868	1542300000	204	5593260	7993.6	0	519120	0	0	488050	0
	1.15324	-0.223211	+	2.84412	-0.673766	+	3.30714	-0.450555	Q9Y2D9	204	Q9Y2D9	Q9Y2D9	Zinc finger protein 652	ZNF652	S						QRRTRRAASVAAATTSPTPRTTRGRRKSVEP	17.33	17.5481	17.2769	16.6843	16.7557	16.6937	17.1807	17.2149	17.0897	2			0.96488	1.91e-17	227.73	205.82	227.73	-0.51753	91599000	204	1262810	0	131480	0	0	137690	0	0
	0.600008	-0.133614	+	2.7457	-0.653858	+	3.02609	-0.520245	Q04637	205	Q04637	Q04637	Eukaryotic translation initiation factor 4 gamma 1	EIF4G1	T				yes		KDITEEIMSGARTASTPTPPQTGGGLEPQAN	16.9493	16.9124	16.6797	16.1939	16.1463	16.2396	16.7794	16.7526	16.6086	3			0.955575	6.01e-44	239.09	211.51	239.09	-0.065899	3060500000	205	895494	0	78281	23209	0	68078	21608	0
	0.877694	0.410284	+	2.12445	1.04865	+	2.18757	0.638367	Q01433	168	Q01433	Q01433	AMP deaminase 2	AMPD2	S				yes		IEQLEERRQRLERQISQDVKLEPDILLRAKQ	20.2562	20.7886	20.1603	21.4767	21.5678	21.3067	20.6257	20.9441	20.8662	2			1	1.74e-23	249.32	164.23	199.05	0.21415	3092700000	168	19224400	499.64	962100	0	0	1224300	0	0
	0.233871	-0.106611	+	2.80016	1.82693	+	3.38796	1.93354	Q01658	105	Q01658	Q01658	Protein Dr1	DR1	S						VLQECKTVALKRRKASSRLENLGIPEEELLR	17.42	16.8671	16.9699	18.7194	18.7694	19.2491	17.0092	16.8689	17.0591	3			0.977737	3.78e-13	196.2	181.62	105.79	0.1278	144310000	105	2490610	3100.5	139780	0	0	86995	0	0
	0.553509	-0.0513598	+	2.70029	0.208179	+	3.00295	0.259539	Q01850	311	Q01850	Q01850	Cerebellar degeneration-related protein 2	CDR2	S						LTVPESHRKPLKRSSSETILSSLAGSDIVKG	17.9571	17.9227	17.8597	18.1237	18.1292	18.1112	17.8599	17.8115	17.914	2			0.814675	2.7e-66	341.73	244.53	341.73	-0.27475	255840000	311	2352870	3228.3	201410	0	0	177260	0	0
	0.353348	0.0377706	+	3.54642	-0.211445	+	2.23837	-0.249215	Q04637	207	Q04637	Q04637	Eukaryotic translation initiation factor 4 gamma 1	EIF4G1	T				yes		ITEEIMSGARTASTPTPPQTGGGLEPQANGE	16.1757	16.1795	16.1525	15.9279	15.9651	15.9804	16.1735	16.154	16.2936	3			0.871105	0.000595537	68.101	52.026	68.101	-1.2226	568350000	207	643990	0	0	59967	0	0	54716	0
	0.471583	-0.119019	+	1.58049	-0.515038	+	1.70488	-0.396019	Q13501	207	Q13501	Q13501	Sequestosome-1	SQSTM1	S						HFGWPGWEMGPPGNWSPRPPRAGEARPGPTA	19.4303	19.1685	19.0684	18.798	18.5004	18.8237	19.1358	19.0999	19.0745	5			1	6e-14	168.69	151.16	152.38	-0.41643	382990000	207	4822240	1857.8	548590	0	0	410610	0	0
	0.693057	0.166873	+	4.56668	2.09443	+	4.57271	1.92756	Q01974	449	Q01974	Q01974	Tyrosine-protein kinase transmembrane receptor ROR2	ROR2	S						ASASTPQRRQLMASPSQDMEMPLINQHKQAK	16.377	16.4531	16.1774	18.4571	18.5026	18.331	16.629	16.3776	16.5014	3			0.993961	1.29e-17	206.46	185.64	206.46	-0.28804	93192000	449	1689040	1585.3	68767	0	0	65802	0	0
+	1.78679	0.763552	+	3.48569	2.6319	+	3.07922	1.86835	Q04637	1077	Q04637	Q04637	Eukaryotic translation initiation factor 4 gamma 1	EIF4G1	S						RPIDTSRLTKITKPGSIDSNNQLFAPGGRLS	15.3344	15.8602	15.564	18.3754	18.4025	17.8764	16.2908	16.5743	16.1841	2			0.999759	3e-07	143.39	109.21	143.39	-0.41197	169110000	1077	1414000	0	33839	0	0	44116	0	0
	1.07645	-0.0399354	+	3.09326	-0.441456	+	2.91423	-0.40152	Q14244	209	Q14244	Q14244	Ensconsin	MAP7	S				yes		VISKRLSSSSATLLNSPDRARRLQLSPWESS	19.5391	19.5308	19.5026	19.1706	19.0685	19.009	19.4884	19.5053	19.459	3			1	1.06e-22	258.92	200.22	227.08	-0.17115	1818400000	209	6167450	23107	590710	0	0	524200	0	0
	0.308921	0.0595538	+	2.1083	0.635869	+	1.74648	0.576315	Q04637	1209	Q04637	Q04637	Eukaryotic translation initiation factor 4 gamma 1	EIF4G1	S				yes		SRERPSQPEGLRKAASLTEDRDRGRDAVKRE	19.4088	19.3643	19.352	20.2105	19.7738	20.0484	19.5368	19.4826	19.2844	2			0.972883	2.66e-08	142.12	116.07	135.1	-0.14839	1038100000	1209	7628270	2573.2	540620	0	0	468560	0	0
+	3.96285	1.24612	+	4.04477	1.58999	+	2.27249	0.343877	Q05209	449	Q05209	Q05209	Tyrosine-protein phosphatase non-receptor type 12	PTPN12	S						LSFEIKKVPLQEGPKSFDGNTLLNRGHAIKI	15.9087	16.1836	16.0213	17.6285	17.731	17.5241	17.2846	17.3159	17.2514	3			0.999803	8.89e-13	180.37	170.09	180.37	-0.14403	177620000	449	1366870	0	50008	0	0	54865	0	0
	0.0189013	-0.0093104	+	1.65316	0.544822	+	1.46458	0.554133	Q05952	85	Q05952	Q05952	Nuclear transition protein 2	TNP2	T						SQSPNTSPPPKRHKKTMNSHHSPMRPTILHC	15.8637	15.7116	15.5302	16.2303	16.0558	16.4539	15.9419	15.6454	15.4903	3			0.998941	0.0318769	44.44	10.346	44.44	2.7739	347490000	85	570142	0	0	48504	0	0	39911	0
	0.383562	-0.033247	+	2.47273	-0.296254	+	2.46321	-0.263007	Q14134	21	Q14134	Q14134	Tripartite motif-containing protein 29	TRIM29	S				yes		ASRSNGSSPEARDARSPSGPSGSLENGTKAD	18.6572	18.6963	18.5937	18.372	18.4049	18.2814	18.6191	18.5781	18.6502	3			0.999713	2.97e-29	258.87	232.91	258.87	0.23067	588200000	21	3464440	5739.1	324260	0	0	298640	0	0
	0.0189013	-0.0093104	+	1.65316	0.544822	+	1.46458	0.554133	Q05952	88	Q05952	Q05952	Nuclear transition protein 2	TNP2	S						PNTSPPPKRHKKTMNSHHSPMRPTILHCRCP	15.8637	15.7116	15.5302	16.2303	16.0558	16.4539	15.9419	15.6454	15.4903	3			0.94863	0.0318769	44.44	10.346	44.44	2.7739	347490000	88	570142	0	0	48504	0	0	39911	0
	0.334634	-0.050958	+	2.5859	-0.736937	+	2.37742	-0.685979	Q6IQ22	21	Q6IQ22	Q6IQ22	Ras-related protein Rab-12	RAB12	S						ALQRRAGGGGGLGAGSPALSGGQGRRRKQPP	18.0455	17.9319	17.9526	17.3258	17.3615	17.0318	17.9823	17.8214	17.9734	2			1	7.44e-71	291.28	261.73	248.1	-1.2839	452260000	21	1979310	2483.4	213910	0	0	178360	0	0
	0.232005	-0.0373262	+	2.80261	-0.505309	+	3.38106	-0.467983	Q86UU0	21	Q86UU0	Q86UU0	B-cell CLL/lymphoma 9-like protein	BCL9L	S						NKTRLPHPRRREAPGSPPLSPRGHCPPAPAK	18.4008	18.4333	18.2486	17.8011	17.8487	17.917	18.3443	18.3569	18.2695	3			1	0.000428258	126.32	80.161	52.862	-0.24073	164940000	21	2708180	0	159530	112830	0	166390	83720	0
	0.293813	-0.0901527	+	2.61635	-0.849232	+	3.93436	-0.759079	Q8IUD2	21	Q8IUD2	Q8IUD2	ELKS/Rab6-interacting/CAST family member 1	ERC1	S						RSVGKVEPSSQSPGRSPRLPRSPRLGHRRTN	22.0709	22.2167	21.8094	21.2122	21.2262	21.1108	21.9774	21.9778	21.8714	2			1	3.43e-16	224.36	194.29	157.82	0.067245	3478600000	21	31873900	78917	2085500	1220000	0	2080900	1125800	0
	1.18759	0.348486	+	2.95811	1.16293	+	3.08078	0.814445	Q06190	181	Q06190	Q06190	Serine/threonine-protein phosphatase 2A regulatory subunit B'' subunit alpha	PPP2R3A	S						NNDGNAPSFGLLRSSSVEEKPLSHRNSLDTN	15.8142	16.2391	16.0339	17.3169	17.1027	17.1564	16.3172	16.5037	16.3117	3			0.899072	3.39e-08	179.14	147.62	179.14	-0.038569	174280000	181	949408	4142.9	46897	0	0	56957	0	0
	1.32104	-0.245688	+	1.95454	0.503553	+	2.33305	0.749242	Q06210	261	Q06210	Q06210	Glutamine--fructose-6-phosphate aminotransferase [isomerizing] 1	GFPT1	S				yes		RGKDKKGSCNLSRVDSTTCLFPVEEKAVEYY	20.6783	20.5539	20.6639	21.2435	21.239	20.9243	20.2335	20.4869	20.4387	3			0.972261	2.01e-29	286.59	221.55	200.99	-0.66652	2019000000	261	16316900	1161.2	1281900	0	0	1045000	0	0
	0.0883882	0.0257126	+	2.81456	0.760873	+	3.00206	0.73516	Q07002	12	Q07002	Q07002	Cyclin-dependent kinase 18	CDK18	S				yes		____MNKMKNFKRRFSLSVPRTETIEESLAE	15.4552	15.2724	15.1786	16.1155	16.123	15.9503	15.1998	15.3888	15.3946	3			0.999999	0.00105298	142.83	113.74	142.83	-0.046657	81509000	12	461618	0	36736	0	0	29680	0	0
	1.2043	-0.119248	+	2.77496	-0.414519	+	2.54375	-0.295271	Q5VUA4	2101	Q5VUA4	Q5VUA4	Zinc finger protein 318	ZNF318	S				yes		EGERNSPNPRSVRIPSPNILKTGLTENVDRG	20.8589	20.8049	20.7222	20.4216	20.4165	20.3043	20.7153	20.681	20.6318	2			1	0.00442315	117.14	79.408	92.445	0.046189	794660000	2101	14610000	5954.4	1449500	0	0	1237800	0	0
	1.41993	0.221116	+	2.21338	-0.473122	+	3.36869	-0.694238	O95639	211	O95639	O95639	Cleavage and polyadenylation specificity factor subunit 4	CPSF4	S						PLQRSSSLIQLTSQNSSPNQQRTPQVIGVMQ	15.2689	15.0524	15.0856	14.5449	14.7207	14.722	15.3625	15.3075	15.4003	2			0.845987	1.56e-07	137.52	110.98	137.52	-0.1258	64793000	211	314141	0	32363	0	0	25589	0	0
	0.465933	0.0710297	+	2.92669	-0.658056	+	3.02827	-0.729085	Q8NI08	211	Q8NI08	Q8NI08	Nuclear receptor coactivator 7	NCOA7	S						ARKALKPIERVLSSTSEEDEPGVVKFLKMNC	17.1137	17.1712	17.2633	16.4747	16.6573	16.4421	17.2196	17.1905	17.3513	2			0.877006	0.0145729	65.5	45.739	65.5	-3.5353	151890000	211	1211140	9975.7	113500	0	0	106790	0	0
	1.29355	-0.27092	+	2.19284	0.687718	+	2.4105	0.958639	Q07352	54	Q07352	Q07352	Zinc finger protein 36, C3H1 type-like 1	ZFP36L1	S						KAVGTPAGGGFPRRHSVTLPSSKFHQNQLLS	17.9001	17.9807	17.9006	18.7574	18.3575	18.7296	17.722	17.7766	17.47	3			0.970043	0.00420286	94.717	47.456	94.717	-0.14485	93204000	54	2666650	4724.9	193760	0	0	184330	0	0
	0.493677	0.0678768	+	3.35256	-0.732733	+	4.08462	-0.80061	O95639	212	O95639	O95639	Cleavage and polyadenylation specificity factor subunit 4	CPSF4	S						LQRSSSLIQLTSQNSSPNQQRTPQVIGVMQS	16.8795	16.7765	16.6909	15.9709	16.1154	16.0624	16.8159	16.8987	16.8359	2			0.917123	4.15e-13	197.38	168.41	197.38	0.089016	123350000	212	895156	426.35	96782	0	0	81836	0	0
	0.868379	0.276299	+	2.13525	0.874791	+	2.3783	0.598492	Q07889	1134	Q07889	Q07889	Son of sevenless homolog 1	SOS1	S						TVFIQVTLPHGPRSASVSSISLTKGTDEVPV	19.2559	19.1388	19.6189	20.3342	20.0218	20.282	19.5916	19.6775	19.5735	2			0.999008	1.44e-24	283.47	229.7	283.47	-0.27994	354190000	1134	8525610	37110	487240	0	0	402470	0	0
	0.977113	-0.180117	+	2.6451	0.892739	+	2.92876	1.07286	Q08495	26	Q08495	Q08495	Dematin	DMTN	S						SPGSVSPSRDSSVPGSPSSIVAKMDNQVLGY	16.3925	16.5951	16.5272	17.2569	17.3127	17.6234	16.259	16.4499	16.2656	2			0.798233	9.02e-05	135.02	102.09	135.02	-2.1999	37866000	26	1089560	1898.5	69494	0	0	72413	0	0
	0.52494	0.10642	+	2.53069	-0.658367	+	2.39146	-0.764786	Q96N67	2129	Q96N67	Q96N67	Dedicator of cytokinesis protein 7	DOCK7	S						PQLYKAVLPVTCHRDSFSRMSLRKMDL____	17.6921	17.6235	17.7208	17.0885	17.1449	16.8279	17.8122	17.916	17.6275	3			0.999912	5.85e-10	194.94	159.04	194.94	-0.5734	909510000	2129	1713650	1271.5	168200	0	0	144870	0	0
	0.15522	-0.0431423	+	2.97251	-1.06346	+	3.62406	-1.02032	Q53LP3	213	Q53LP3	Q53LP3	Ankyrin repeat domain-containing protein SOWAHC	SOWAHC	S				yes		QRPARQNLRDLVMGSSPQLKRSVCPGGSSPG	21.6409	21.5529	21.3076	20.3877	20.5867	20.3365	21.5149	21.4179	21.4391	3			0.860229	5.19e-10	206.63	117	206.63	-0.14884	2259300000	213	21602700	42279	2467100	0	0	2049700	0	0
	1.52363	0.131843	+	3.08456	-1.21813	+	3.26104	-1.34997	Q92882	213	Q92882	Q92882	Osteoclast-stimulating factor 1	OSTF1	S						VRTLSNAEDYLDDEDSD______________	17.0754	17.1148	17.0149	15.8937	16.0527	15.6042	17.2066	17.2442	17.1498	2			1	2.2e-18	232.35	223.16	232.35	0.50234	61118000	213	1039410	5839.9	110580	0	0	102800	0	0
	0.22944	-0.0421365	+	1.74678	-0.335283	+	2.27785	-0.293147	Q9UQ35	2132	Q9UQ35	Q9UQ35	Serine/arginine repetitive matrix protein 2	SRRM2	S						FSRPSMSPTPLDRCRSPGMLEPLGSSRTPMS	21.3016	21.3493	21.1191	20.9307	21.0041	20.8294	21.1846	21.2192	21.2397	3			1	6.47e-10	203.97	167.79	194.27	-0.41425	13871000000	2132	20883800	12525	1958700	0	0	1786700	0	0
	0.661553	0.254956	+	2.93501	1.16933	+	2.76002	0.914371	Q08499;Q07343;Q08493	190;133;119	Q08499	Q08499	cAMP-specific 3',5'-cyclic phosphodiesterase 4D;cAMP-specific 3',5'-cyclic phosphodiesterase 4B;cAMP-specific 3',5'-cyclic phosphodiesterase 4C	PDE4D;PDE4B;PDE4C	S						GLILQANFVHSQRRESFLYRSDSDYDLSPKS	14.5358	14.2314	14.6829	15.56	15.6799	15.7181	14.5285	14.9168	14.7696	3			1	0.00132811	132.88	105.1	132.88	0.17858	56410000	190	320302	924.23	19657	0	0	14710	0	0
	0.335811	-0.0947679	+	1.70489	0.385389	+	2.24938	0.480157	Q08945	657	Q08945	Q08945	FACT complex subunit SSRP1	SSRP1	S						TPSRGSSSKSSSRQLSESFKSKEFVSSDESS	16.8901	17.0398	16.7282	17.1813	17.3494	17.2836	16.6591	16.7999	16.9148	2			0.959458	0.00633346	108.4	46.819	108.4	-0.18799	66918000	657	1200900	0	97483	0	0	97733	0	0
	0.931293	-0.0873076	+	2.82828	-0.301577	+	2.48735	-0.21427	Q96JM3	214	Q96JM3	Q96JM3	Chromosome alignment-maintaining phosphoprotein 1	CHAMP1	S						LAPVPSPEPQKPAPVSPESVKATLSNPKPQK	19.3491	19.4248	19.31	19.054	19.0957	19.0294	19.2298	19.2662	19.3259	4			0.999655	5.43e-13	162.91	149.82	162.91	-0.021868	1542300000	214	5593260	7993.6	0	519120	0	0	488050	0
+	1.6169	0.668231	+	3.54888	1.1788	+	1.14442	0.510567	Q08945	659	Q08945	Q08945	FACT complex subunit SSRP1	SSRP1	S				yes		SRGSSSKSSSRQLSESFKSKEFVSSDESSSG	17.1729	17.228	17.2676	18.401	18.5664	18.2377	17.939	17.5457	18.1886	3			0.799503	0.0217779	66.498	13.805	66.498	0.46643	177680000	659	2357460	4186.4	118160	0	0	110960	0	0
	0.319803	-0.065368	+	2.29145	-0.435984	+	2.77183	-0.370616	Q9C0D5	214	Q9C0D5	Q9C0D5	Protein TANC1	TANC1	S						VSKTAANKSPCETISSPSSTLESKDSGIIAT	17.0876	16.859	17.0684	16.6236	16.5524	16.5311	17.0027	16.9528	16.8634	3			0.871945	5.05e-07	110.03	87.651	110.03	-0.69152	43215000	214	1070670	3164.4	111500	0	0	86519	0	0
	0.890436	-0.109053	+	2.64947	-0.40421	+	2.86902	-0.295156	O15417	2146	O15417	O15417	Trinucleotide repeat-containing gene 18 protein	TNRC18	T						EDEHLPRGGAVERPLTPAPRSCIIDKDELKD	16.8518	16.9555	16.7788	16.4172	16.4466	16.5098	16.7128	16.7471	16.7992	3			1	0.0013743	95.347	55.838	93.51	0.45681	227930000	2146	959952	1307.4	94977	0	0	92333	0	0
	0.852382	0.353426	+	2.50047	0.934701	+	1.48698	0.581275	Q08AD1	1313	Q08AD1	Q08AD1	Calmodulin-regulated spectrin-associated protein 2	CAMSAP2	S						DNESVHSGKRTPRSESVEGFLSPSRCGSRNG	13.918	14.0956	13.7011	14.806	14.6976	15.0152	14.1493	14.5646	14.0611	2			0.950632	2.11e-07	177.38	117.12	177.38	1.8534	57800000	1313	200639	0	12914	0	0	13423	0	0
	0.871764	-0.099624	+	2.04817	-0.334774	+	2.1282	-0.23515	Q9H6K1	215	Q9H6K1	Q9H6K1	Uncharacterized protein C6orf106	C6orf106	S				yes		TQPHRKVEGNFNPFASPQKNRQSDENNLKDP	20.5687	20.5584	20.4053	20.162	20.2628	20.1033	20.4002	20.4124	20.4209	2			1	9.89e-10	190.23	160.1	83.823	1.7137	810150000	215	12286800	29062	1189900	0	0	1048200	0	0
	0.624265	0.255601	+	2.34117	1.26831	+	2.85407	1.01271	Q09666	1010	Q09666	Q09666	Neuroblast differentiation-associated protein AHNAK	AHNAK	S						NLKMPKIKMPKFSMPSLKGEGPEFDVNLSKA	14.1102	14.6045	14.6961	15.6802	15.9787	15.5569	14.7672	14.7395	14.6709	3			0.841008	0.0302038	45.257	29.314	45.257	2.7729	59685000	1010	327477	0	14717	0	0	18918	0	0
	0.525925	-0.10982	+	2.52088	-0.608133	+	3.42063	-0.498313	Q7Z417	216	Q7Z417	Q7Z417	Nuclear fragile X mental retardation-interacting protein 2	NUFIP2	S						GYMGKGADNDGSGSESGYTTPKKRKARRNSA	17.0598	17.3568	17.1535	16.575	16.6468	16.5238	17.0562	17.1351	17.0493	2			0.811812	8.29e-05	118.47	88.534	118.47	1.2951	66102000	216	1155750	2611.7	0	109410	0	0	121020	0
	0.143922	0.0377089	+	2.19425	-0.802541	+	2.47501	-0.84025	Q93015	217	Q93015	Q93015	N-acetyltransferase 6	NAT6	S						RRLPATLLNAFPTAPSPRPPRKAPNLTAQAA	17.2447	17.222	16.9749	16.2318	16.598	16.2042	17.1158	17.2684	17.1704	3			0.999858	2.97e-08	137.58	122.61	137.58	0.16946	303730000	217	1127160	0	124070	0	0	110510	0	0
	1.08348	-0.15351	+	2.62522	-0.513953	+	2.09098	-0.360442	Q5JSH3	219	Q5JSH3	Q5JSH3	WD repeat-containing protein 44	WDR44	T				yes		AAVEEVAPAKPPRHLTPEPDIVASTKKPVPA	19.9426	20.0337	19.8675	19.4864	19.4965	19.319	19.8859	19.7388	19.7585	3			1	6.4e-05	152.34	105.28	152.34	0.099262	315420000	219	7862940	1115.9	777260	0	0	735860	0	0
	0.495865	-0.101098	+	2.26754	-0.551994	+	2.51951	-0.450895	Q7Z417	219	Q7Z417	Q7Z417	Nuclear fragile X mental retardation-interacting protein 2	NUFIP2	T						GKGADNDGSGSESGYTTPKKRKARRNSAKGC	18.0696	18.3224	18.0904	17.5861	17.7219	17.5183	17.9992	18.126	18.0538	2			0.81157	8.9e-07	161.75	140.19	83.729	-0.33174	178320000	219	2293120	2860.91	108020	109410	0	111070	121020	0
	0.579974	0.0713882	+	2.37485	-0.294527	+	3.41729	-0.365915	Q8WU79	219	Q8WU79	Q8WU79	Stromal membrane-associated protein 2	SMAP2	S				yes		SNTLEKDLDLLASVPSPSSSGSRKVVGSMPT	18.2733	18.3011	18.1481	17.9137	17.9516	17.9735	18.2699	18.3656	18.3012	2			0.969598	3.29e-15	205.06	182.86	110.12	-0.10076	486150000	219	2688300	3738.9	249740	0	0	228780	0	0
	0.661775	-0.137711	+	1.60821	-0.427937	+	1.54436	-0.290226	P15924	22	P15924	P15924	Desmoplakin	DSP	S						SHPRINTLGRMIRAESGPDLRYEVTSGGGGT	19.9579	20.2458	19.9973	19.7089	19.7328	19.4755	19.9317	19.976	19.8801	3			1	3.31e-06	117.82	94.023	58.817	-2.7547	711100000	22	8733780	4541.9	785430	0	0	848990	0	0
+	2.26185	-0.458782	+	3.46387	1.6927	+	3.70366	2.15148	Q09666	1068	Q09666	Q09666	Neuroblast differentiation-associated protein AHNAK	AHNAK	S						PKFKMPEMHFRAPKMSLPDVDLDLKGPKMKG	17.5914	17.5766	17.4852	19.0844	19.1128	19.5341	17.1998	16.9426	17.1344	3			1	0.000433593	102.65	87.721	102.65	-0.29202	324130000	1068	3079810	0	157070	0	0	140360	0	0
	0.0864061	0.0205987	+	2.16922	-0.421484	+	2.74328	-0.442083	Q7Z417	220	Q7Z417	Q7Z417	Nuclear fragile X mental retardation-interacting protein 2	NUFIP2	T				yes		KGADNDGSGSESGYTTPKKRKARRNSAKGCE	18.1832	18.3098	18.0615	17.8408	17.7094	17.7397	18.1576	18.2952	18.1634	4			0.920772	8.59e-25	243.87	220.7	243.87	-0.50774	209350000	220	2479230	4747.8	234900	0	0	230120	0	0
+	2.277	-0.722768	+	3.20203	1.39292	+	4.5136	2.11569	Q09666	135	Q09666	Q09666	Neuroblast differentiation-associated protein AHNAK	AHNAK	S				yes		EYQRIYTTKIKPRLKSEDGVEGDLGETQSRT	19.8416	19.4764	19.5042	20.8997	20.9377	21.1635	18.8898	18.7809	18.9832	3			1	1.87e-15	206.33	181.37	206.33	0.10519	7923600000	135	10780300	0	725660	0	0	505330	0	0
	0.802045	0.149081	+	5.16934	2.73757	+	6.39139	2.58849	Q09666	210	Q09666	Q09666	Neuroblast differentiation-associated protein AHNAK	AHNAK	S				yes		VDVETQSGKTVIRLPSGSGAASPTGSAVDIR	18.4768	18.5765	18.2946	21.1685	21.1388	21.2533	18.6047	18.5542	18.6361	3			0.997693	3.97e-47	287.17	230.85	287.17	0.47549	3103000000	210	10334300	0	181980	104850	0	191050	84413	0
	0.767388	0.22684	+	3.93672	2.37481	+	4.62874	2.14797	Q09666	212	Q09666	Q09666	Neuroblast differentiation-associated protein AHNAK	AHNAK	S						VETQSGKTVIRLPSGSGAASPTGSAVDIRAG	16.3561	15.91	16.2093	18.4657	18.4247	18.7095	16.3926	16.4435	16.3198	3			0.777434	3.13e-10	145.52	115.31	145.52	0.48242	164960000	212	1755130	2052.5	0	67797	0	0	45625	0
	1.11454	-0.533843	+	1.13524	0.676289	+	2.34874	1.21013	Q09666	2397	Q09666	Q09666	Neuroblast differentiation-associated protein AHNAK	AHNAK	S				yes		KAPKISMPDLDLHLKSPKAKGEVDVDVPKLE	20.7299	20.2369	20.0348	20.7829	20.8614	21.3863	19.7814	19.6542	19.9646	4			1	4.73e-14	214.26	180.39	214.26	-0.3468	1009100000	2397	13766800	8986	1327800	0	0	843970	0	0
	0.982994	0.252984	+	3.37584	0.969899	+	2.14471	0.716915	Q09666	3326	Q09666	Q09666	Neuroblast differentiation-associated protein AHNAK	AHNAK	S						VDVSGPKLEGDIKAPSLDIKGPEVDVSGPKL	13.9029	14.009	13.8987	14.8172	15.0715	14.8316	14.0884	14.0616	14.4196	3			1	0.000513772	86.546	78.633	86.546	0.19302	37732000	3326	202545	672.83	12782	0	0	12662	0	0
+	5.32575	1.45649	+	5.20139	2.8063	+	3.90624	1.3498	Q09666	3360	Q09666	Q09666	Neuroblast differentiation-associated protein AHNAK	AHNAK	S						GKSKKSRFKLPKFNFSGSKVQTPEVDVKGKK	16.6839	16.5879	16.6473	19.4113	19.6084	19.3184	18.0457	18.0841	18.1589	3			0.981774	2.49e-05	121.26	98.885	121.26	-0.65783	229770000	3360	3578060	1384.9	84729	0	0	72065	0	0
	1.41095	-0.105386	+	1.68545	-0.483924	+	1.33633	-0.378538	Q9ULR3	224	Q9ULR3	Q9ULR3	Protein phosphatase 1H	PPM1H	T						AASLRGGVGAPGSPSTPPTRFFTEKKIPHEC	13.9753	13.9858	14.0339	13.2767	13.7207	13.5459	13.9522	13.8589	13.8677	2			0.84289	0.00465783	93.228	78.549	93.228	-0.38277	17446000	224	129986	0	13427	0	0	12465	0	0
	1.20154	0.716241	+	3.46621	3.1896	+	5.82857	2.47336	Q09666	379	Q09666	Q09666	Neuroblast differentiation-associated protein AHNAK	AHNAK	S						EGLEGKLKGPQITGPSLEGDLGLKGAKPQGH	15.5697	16.5278	15.9746	19.2836	19.2149	19.1425	16.7622	16.7909	16.6676	3			0.999888	5.78e-13	192.47	165.32	192.47	-0.65402	218670000	379	2563930	0	39712	0	0	69200	0	0
	0.690704	-0.287066	+	1.67063	0.653179	+	3.7856	0.940245	Q09666	4100	Q09666	Q09666	Neuroblast differentiation-associated protein AHNAK	AHNAK	T						PKADIDVSGPKVDIDTPDIDIHGPEGKLKGP	18.7917	19.039	18.4291	19.4261	19.4192	19.374	18.5703	18.4861	18.3422	3			1	1.63e-28	229	195.3	229	-0.33673	1566700000	4100	4614020	2491.7	355330	0	0	376270	0	0
	1.0394	-0.302926	+	2.10727	0.483855	+	2.88636	0.786781	Q09666	4430	Q09666	Q09666	Neuroblast differentiation-associated protein AHNAK	AHNAK	T						KGPEIDIKGPSLDIDTPDVNIEGPEGKLKGP	16.7607	16.9497	16.6152	17.2444	17.2883	17.2445	16.6502	16.4492	16.3174	2			0.999991	6.84e-06	129.32	86.021	129.32	-1.1163	143870000	4430	1099540	35.482	89269	0	0	91970	0	0
	0.162867	-0.0961107	+	1.58958	0.732541	+	3.39519	0.828651	Q09666	4564	Q09666	Q09666	Neuroblast differentiation-associated protein AHNAK	AHNAK	T						KGPKVDVKGPKVGIDTPDIDIHGPEGKLKGP	18.4914	18.628	17.9409	19.1339	19.049	19.075	18.3231	18.335	18.1139	3			1	2.27e-07	175.33	160.56	157.98	0.42412	457240000	4564	3726640	0	289690	0	0	285190	0	0
	0.513435	-0.304328	+	1.36039	0.677605	+	2.86258	0.981934	Q09666	4766	Q09666	Q09666	Neuroblast differentiation-associated protein AHNAK	AHNAK	T						KGPEADIKGPKVDINTPDVDVHGPDWHLKMP	20.7896	21.0113	20.2358	21.3978	21.2948	21.3769	20.512	20.4759	20.1358	3			1	1.72e-24	246.21	211.99	232.32	-0.34722	1044100000	4766	17768300	26696	1382700	0	0	1422600	0	0
	0.336976	0.096935	+	4.04352	1.64228	+	3.92835	1.54535	Q09666	4908	Q09666	Q09666	Neuroblast differentiation-associated protein AHNAK	AHNAK	S						EGPDAKLSGPSLKMPSLEISAPKVTAPDVDL	15.2486	15.4202	15.1324	16.8169	16.8889	17.0223	15.4851	15.2016	15.4053	2			0.998808	0.00054731	134.75	95.449	134.75	0.4892	71621000	4908	648366	0	31921	0	0	32790	0	0
	0.229717	-0.0383282	+	2.2688	-0.343143	+	2.2062	-0.304815	Q9NYB9	227	Q9NYB9	Q9NYB9	Abl interactor 2	ABI2	S				yes		DYVPSPTRNMAPSQQSPVRTASVNQRNRTYS	18.7422	18.8371	18.667	18.4777	18.3937	18.3454	18.7934	18.6489	18.6891	2			1	3.61e-42	273.25	242.14	214.47	-0.68999	649010000	227	3667360	4144.5	343570	0	0	328380	0	0
+	1.99215	0.454261	+	4.08501	2.27028	+	3.73424	1.81602	Q09666	5400	Q09666	Q09666	Neuroblast differentiation-associated protein AHNAK	AHNAK	S						VSVGAPDLSLEASEGSIKLPKMKLPQFGIST	18.7159	18.9649	18.8703	21.1232	21.3247	20.914	19.2123	19.2651	19.4364	3			0.999992	7.25e-59	313.22	284.71	244.22	-0.47658	1497100000	5400	11023800	0	337460	0	0	357920	0	0
+	2.17655	0.409398	+	3.90584	1.50064	+	3.87368	1.09124	Q09666	570	Q09666	Q09666	Neuroblast differentiation-associated protein AHNAK	AHNAK	S				yes		PRLGSPSGKTGTCRISMSEVDLNVAAPKVKG	19.6221	19.4329	19.3775	20.8756	20.9466	21.1123	19.9111	19.8308	19.9189	2			0.998277	2.54e-44	293.88	266.31	191.78	-0.15175	1195100000	570	12112100	6508.3	625050	0	0	490730	0	0
	0.801815	0.076437	+	4.72361	-0.788197	+	4.26039	-0.864634	Q14671	229	Q14671	Q14671	Pumilio homolog 1	PUM1	S						SGGLGVSMVEYVLSSSPGDSCLRKGGFGPRD	17.2707	17.2375	17.3053	16.4507	16.5365	16.4617	17.3821	17.2688	17.3918	3			0.958134	7.83e-53	283.73	252.11	283.73	-0.097252	302060000	229	1249990	336.98	126280	0	0	111670	0	0
	0.322393	-0.0532303	+	1.84724	-0.296951	+	2.47171	-0.243721	Q9Y3Q8	229	Q9Y3Q8	Q9Y3Q8	TSC22 domain family protein 4	TSC22D4	T				yes		PSLRVEAEAGGSGARTPPLSRRKAVDMRLRM	17.9487	17.8813	17.7323	17.5261	17.5242	17.6212	17.7705	17.7874	17.8447	2			0.894243	1.82e-05	117.4	94.024	117.4	-1.1911	518660000	229	1987350	3202.9	200270	0	0	172380	0	0
	1.20737	0.320151	+	2.7053	1.61311	+	2.60649	1.29296	Q09666	5824	Q09666	Q09666	Neuroblast differentiation-associated protein AHNAK	AHNAK	T						EGGKVKGKHGKLKFGTFGGLGSKSKGHYEVT	14.8499	14.5907	15.0058	16.5308	16.6917	16.0633	15.1781	15.1501	15.0787	2			0.888924	0.00109777	124.42	81.861	124.42	0.36715	106290000	5824	483847	0	24339	0	0	18744	0	0
+	3.29888	0.842419	+	4.26809	2.68468	+	3.56326	1.84226	Q09666	5830	Q09666	Q09666	Neuroblast differentiation-associated protein AHNAK	AHNAK	S						GKHGKLKFGTFGGLGSKSKGHYEVTGSDDET	16.7782	16.7659	16.923	19.5187	19.7415	19.2609	17.6443	17.5649	17.7853	2			1	0.0001087	154.23	102.39	154.23	0.33275	236980000	5830	3475350	0	90342	0	0	81249	0	0
	2.11557	-0.322134	+	2.25703	0.427746	+	3.91315	0.74988	Q12789	1865	Q12789	Q12789	General transcription factor 3C polypeptide 1	GTF3C1	S						QAPPSHSPRGTKRRASWASENGETDAEGTQM	17.3448	17.1644	17.3582	17.6791	17.6599	17.8116	16.9349	16.9946	16.9714	3			0.985202	1.84e-58	302.11	279.99	302.11	-0.33865	148460000	1865	1547530	1637.8	90406	42408	0	70142	36160	0
	0.880026	0.394852	+	2.8571	1.56323	+	4.11628	1.16838	Q12802	2411	Q12802	Q12802	A-kinase anchor protein 13	AKAP13	T						DCSPTHSPRVLFRSNTEEALKGGPLMKSAIN	14.6612	15.3298	15.1188	16.5945	16.5773	16.6276	15.2948	15.5118	15.4878	3			0.906804	0.000444272	104.61	90.645	104.61	-0.93048	66465000	2411	561869	1881.2	21407	0	0	30853	0	0
	0.0220007	0.00538762	+	2.8178	-0.507502	+	2.72224	-0.512889	P04183	231	P04183	P04183	Thymidine kinase, cytosolic	TK1	S						VAARKLFAPQQILQCSPAN____________	18.5723	18.4121	18.4031	17.9146	17.9232	18.0272	18.4971	18.3516	18.555	2			1	0.000368309	127.66	119.56	127.66	0.50627	338950000	231	2954990	7189.1	306070	0	0	246560	0	0
	0.440008	-0.123041	+	1.40097	0.556724	+	1.73977	0.679765	Q12802	2709	Q12802	Q12802	A-kinase anchor protein 13	AKAP13	S						LMRIPSFFPSPEEPPSPSAPSIAKSGSLDSE	13.8312	13.5988	13.912	14.2563	14.1104	14.6454	13.5189	13.775	13.679	2			0.798473	0.0390901	48.053	38.865	48.053	-1.4748	28839000	2709	148009	0	12173	0	0	9602.2	0	0
	0.146285	0.0362244	+	2.32815	-0.398091	+	2.0832	-0.434315	Q14244	231	Q14244	Q14244	Ensconsin	MAP7	T						LQLSPWESSVVNRLLTPTHSFLARSKSTAAL	18.1847	18.0155	18.1526	17.6282	17.7832	17.7471	18.2431	18.0026	18.2157	3			0.999214	0.000384919	133.07	108.38	133.07	0.09505	211200000	231	2398490	0	235140	0	0	188700	0	0
	0.58194	0.126232	+	3.04668	-0.749986	+	3.3622	-0.876218	Q14814	231	Q14814	Q14814	Myocyte-specific enhancer factor 2D	MEF2D	S						ACPSPVGNGYVSARASPGLLPVANGNSLNKV	15.0152	14.9696	14.7861	14.1118	14.2674	14.1418	14.9423	15.0353	15.1721	2			0.984917	0.0103089	68.257	40.847	68.257	0.57625	188790000	231	251543	1504.1	27235	0	0	24199	0	0
	0.706667	0.288674	+	3.16626	1.81499	+	4.53126	1.52631	Q12802	2720	Q12802	Q12802	A-kinase anchor protein 13	AKAP13	S						EEPPSPSAPSIAKSGSLDSELSVSPKRNSIS	13.9549	14.1562	14.5718	16.1414	16.0475	15.939	14.4617	14.488	14.5992	2			0.917028	5.86e-06	159.12	125.34	159.12	-0.27488	29988000	2720	348636	0	13242	0	0	13983	0	0
	0.10533	-0.02631	+	2.23976	-0.475559	+	3.50877	-0.449249	O95359	2317	O95359	O95359	Transforming acidic coiled-coil-containing protein 2	TACC2	S						PKMKKTPEKLDNTPASPPRSPAEPNDIPIAK	20.2473	20.48	20.2079	19.8298	19.8812	19.7976	20.2274	20.3269	20.302	3			0.993481	2.75e-17	160.86	141.71	103.07	-0.5769	1075200000	2317	10579400	15270.3	457980	498220	0	551510	442760	0
	1.03687	-0.392507	+	2.90036	-1.5271	+	3.14861	-1.1346	P08559	232	P08559	P08559	Pyruvate dehydrogenase E1 component subunit alpha, somatic form, mitochondrial	PDHA1	S						PCIFICENNRYGMGTSVERAAASTDYYKRGD	23.7578	23.591	23.2101	21.8504	21.952	22.1751	23.1693	22.9849	23.2272	2			0.999854	0.00031151	166.86	120.02	166.86	-0.57011	4411600000	232	73768400	26126	10411000	0	0	8101100	0	0
	0.261629	-0.144209	+	2.06742	1.14594	+	2.31994	1.29014	Q12857	268	Q12857	Q12857	Nuclear factor 1 A-type	NFIA	S						SYYSMSPGAMRRSLPSTSSTSSTKRLKSVED	15.3467	14.8587	15.3483	16.1957	16.1209	16.675	15.2212	14.7483	15.1517	3			0.955691	0.0030632	81.632	60.775	81.632	0.62054	79258000	268	489157	0	34123	0	0	22456	0	0
	2.10867	-0.351925	+	2.4286	0.923845	+	2.79992	1.27577	Q12857	280	Q12857	Q12857	Nuclear factor 1 A-type	NFIA	S						SLPSTSSTSSTKRLKSVEDEMDSPGEEPFYT	16.4443	16.4319	16.4038	17.1132	17.3051	17.6331	15.9683	16.0488	16.2071	3			1	3.18e-14	173.09	159.69	124.82	0.59747	169460000	280	1017610	0	40388	31598	0	35333	29532	0
	0.144776	0.07197	+	2.68084	-1.2063	+	3.25041	-1.27827	Q5T5U3	233	Q5T5U3	Q5T5U3	Rho GTPase-activating protein 21	ARHGAP21	T						EISPPDSSLSKQQTSTPVLTQPGRAYRMEIQ	19.0592	18.9974	18.5732	17.7671	17.7205	17.5232	19.0676	19.036	18.742	2			0.921175	4.72e-29	289.35	232.13	289.35	-0.13557	359960000	233	3557250	0	426210	0	0	365840	0	0
+	1.64416	1.52378	+	2.41394	2.25307	+	1.47489	0.729286	Q12888	507	Q12888	Q12888	Tumor suppressor p53-binding protein 1	TP53BP1	S						TSEIEPKNSPEDLGLSLTGDSCKLMLSTSEY	13.7374	13.0601	14.3241	15.887	16.1284	15.8655	15.4552	14.8048	15.4331	2			0.999797	1.4e-05	138.08	111.05	138.08	-2.3342	38441000	507	376078	0	11421	0	0	6677.7	0	0
	0.288878	0.0538654	+	1.66183	-0.277671	+	1.86941	-0.331536	Q92503	234	Q92503	Q92503	SEC14-like protein 1	SEC14L1	T						GDALSSPSAPEPVVGTPDDKLDADYIKRYLG	18.7577	18.5808	18.6512	18.278	18.4668	18.4119	18.6434	18.6831	18.8249	4			0.999999	9.89e-13	135.82	129.42	135.82	0.52752	139610000	234	3607110	0	347210	0	0	276260	0	0
	0.581305	-0.0637633	+	2.05245	-0.367573	+	2.10378	-0.303809	Q01082	2341	Q01082	Q01082	Spectrin beta chain, non-erythrocytic 1	SPTBN1	S				yes		AQTLPTSVVTITSESSPGKREKDKEKDKEKR	22.0381	22.1834	22.0429	21.8206	21.7299	21.6111	22.0398	22.0302	22.003	3			0.982418	3.82e-33	262.55	242.29	223.57	-0.41487	7997500000	2341	36730300	0	3232400	0	0	3135600	0	0
+	1.86693	0.498849	+	3.9124	1.41684	+	3.52803	0.917988	Q12965	1002	Q12965	Q12965	Unconventional myosin-Ie	MYO1E	S						SLYTSMARPPLPRQQSTSSDRVSQTPESLDF	17.0443	17.0341	16.7613	18.3139	18.3858	18.3905	17.3462	17.5897	17.4004	4			0.929155	0.000980861	77.766	69.5	77.766	-0.35271	378000000	1002	2036270	4335.9	21577	86686	0	21317	76037	0
	0.0849625	-0.0585938	+	0.914574	-0.599918	+	1.34657	-0.541325	Q8TF74	235	Q8TF74	Q8TF74	WAS/WASL-interacting protein family member 2	WIPF2	S						GREGPPAPPPVKPPPSPVNIRTGPSGQSLAP	19.7515	19.4339	18.9172	18.6551	18.5163	19.1315	19.3081	19.2659	19.3527	3			1	1.28e-09	155.05	130.17	105.24	-0.077328	573980000	235	5377740	2532.4	682530	0	0	491090	0	0
	1.47053	0.629171	+	3.08629	1.58524	+	2.62927	0.956064	Q12965	980	Q12965	Q12965	Unconventional myosin-Ie	MYO1E	S						GVIRNQYVPYPHAPGSQRSNQKSLYTSMARP	16.3406	15.8042	15.9633	17.7457	17.6238	17.4944	16.874	16.463	16.6587	3			0.999982	0.00161743	85.443	66.611	85.443	0.56114	98920000	980	1189650	6185.2	67083	0	0	42482	0	0
	1.72484	-0.0758247	+	2.9516	-0.415569	+	2.73243	-0.339744	Q6Y7W6	236	Q6Y7W6	Q6Y7W6	PERQ amino acid-rich with GYF domain-containing protein 2	GIGYF2	S				yes		RLAGSRRDGERWRPHSPDGPRSAGWREHMER	20.5076	20.5055	20.45	20.1554	20.0643	19.9967	20.4029	20.4088	20.424	4			1	3.55e-05	177.16	70.987	125.75	0.17513	2002100000	236	11949200	13244	949180	192270	0	888490	123040	0
+	2.06232	0.696714	+	4.05221	2.30325	+	5.16926	1.60653	Q12986	967	Q12986	Q12986	Transcriptional repressor NF-X1	NFX1	S						SALERKKRLAEAFHISEDSDPFNIRSSGSKF	12.2784	12.617	12.1485	14.5903	14.7081	14.6553	13.103	13.0627	12.9684	3			0.999994	2.95e-05	111.66	103	111.66	0.54298	10696000	967	124940	0	4234	0	0	4952.7	0	0
	0.506687	-0.229611	+	1.43622	0.497517	+	1.61173	0.727128	Q13017	1202	Q13017	Q13017	Rho GTPase-activating protein 5	ARHGAP5	S				yes		KRKGRHRGSEEDPLLSPVETWKGGIDNPAIT	13.3208	13.6825	13.4412	13.9263	13.8008	14.2099	13.5079	12.937	13.3108	2			0.997364	0.0134207	67.275	49.411	67.275	-0.84382	8338800	1202	115028	0	8602.9	0	0	10159	0	0
	0.174955	0.0813332	+	1.01415	-0.477389	+	1.56097	-0.558722	Q9NQ55	238	Q9NQ55	Q9NQ55	Suppressor of SWI4 1 homolog	PPAN	S						RLQDISELLATGAGLSESEAEPDGDHNITEL	14.714	14.945	14.3853	14.295	13.9113	14.4057	14.7729	14.876	14.6394	4			0.949716	4.1e-09	117.54	108.08	117.54	0.97397	24034000	238	220209	0	22189	0	0	23800	0	0
	0.466349	-0.0518913	+	2.38699	-0.488765	+	2.45724	-0.436874	Q9Y446	238	Q9Y446	Q9Y446	Plakophilin-3	PKP3	S						SSRAGGLDWPEATEVSPSRTIRAPAVRTLQR	19.693	19.5713	19.545	18.9792	19.206	19.1579	19.5209	19.5722	19.5605	2			0.999979	1.56e-15	220.34	195.96	220.34	-0.27908	911880000	238	6427460	7235.7	655910	0	0	538780	0	0
	0.0451931	0.0108255	+	1.64469	-0.357393	+	1.63222	-0.368219	P85037	239	P85037	P85037	Forkhead box protein K1	FOXK1	S						PLKIHIPEPDLRSMVSPVPSPTGTISVPNSC	16.9026	16.8049	16.7143	16.2943	16.478	16.5774	16.751	16.7629	16.9403	2			0.997896	0.000120329	88.168	68.591	80.752	-0.23219	262090000	239	966897	781.33	0	29440	68876	0	28160	55262
	0.631777	-0.229041	+	2.44575	0.921502	+	3.82051	1.15054	Q13045	436	Q13045	Q13045	Protein flightless-1 homolog	FLII	S			yes			KDPMARKMRLRRRKDSAQDDQAKQVLKGMSD	13.9545	14.3454	14.4268	15.2339	15.1114	15.1459	13.9921	14.15	13.8974	3			1	0.00444755	84.566	72.651	84.566	-0.23254	16513000	436	224550	0	13238	0	0	15885	0	0
	0.325623	-0.031229	+	2.44652	-0.240216	+	2.60575	-0.208987	Q9H7N4	239	Q9H7N4	Q9H7N4	Splicing factor, arginine/serine-rich 19	SCAF1	S						RFDIYDPFHPTDEAYSPPPAPEQKYDPFEPT	19.6376	19.5527	19.5304	19.3741	19.3253	19.3007	19.5569	19.5711	19.499	3			1	1.35e-28	232	210.83	232	-0.28104	4710400000	239	6674560	6693.9	631670	0	0	532050	0	0
	1.21977	0.132657	+	3.34904	-0.501668	+	3.18893	-0.634325	O75376	2396	O75376	O75376	Nuclear receptor corepressor 1	NCOR1	T		yes	yes			TQFPYNPLTMRMLSSTPPTPIACAPSAVNQA	16.7313	16.7448	16.6911	16.2581	16.1322	16.272	16.9466	16.837	16.7816	3			0.872505	2.61e-27	208.58	190.98	208.58	-0.39649	312480000	2396	915805	1295.9	87509	0	0	80105	0	0
	0.257067	0.0760975	+	2.04368	0.630167	+	2.24189	0.55407	Q13068;P0CL82;P0CL81;P0CL80;O76087;Q13065	33;33;33;33;33;33	Q13068	Q13068	G antigen 4;G antigen 12I;G antigen 12G;G antigen 12F;G antigen 7;G antigen 1	GAGE4;GAGE12I;GAGE12G;GAGE12F;GAGE7;GAGE1	S						VQPPEMIGPMRPEQFSDEVEPATPEEGEPAT	14.9043	14.557	14.7934	15.4086	15.2233	15.5134	14.8545	14.9121	14.7164	4			0.999909	1.47e-48	230.54	208.13	230.54	-0.19121	870140000	33	307461	0	25257	0	0	18322	0	0
	0.780304	-0.775139	+	2.62529	2.1882	+	3.06488	2.96334	Q13085	23	Q13085	Q13085	Acetyl-CoA carboxylase 1;Biotin carboxylase	ACACA	S						AQPLELNQHSRFIIGSVSEDNSEDEISNLVK	13.9373	13.0195	14.0055	15.8996	15.8166	15.8107	13.168	12.221	13.2478	2			0.997434	5.07e-07	130.39	104.53	130.39	-0.87689	95080000	23	254047	0	13084	0	0	6497.1	0	0
	0.158675	-0.0799077	+	2.35679	-0.846088	+	2.37491	-0.76618	O75179	2401	O75179	O75179	Ankyrin repeat domain-containing protein 17	ANKRD17	S						NDSSAQSVSSGVRAPSPAPSSVPLGSEKPSN	18.1469	17.8834	17.6582	17.1111	16.9843	17.0548	17.6323	17.7607	18.0558	3			0.796283	6.88e-05	91.767	76.131	91.767	-0.55838	1368100000	2401	1822490	0	229180	0	0	172610	0	0
	0.269135	-0.158423	+	2.00143	1.37995	+	2.75211	1.53838	Q13085	80	Q13085	Q13085	Acetyl-CoA carboxylase 1;Biotin carboxylase	ACACA	S						SSLQDGLALHIRSSMSGLHLVKQGRDRKKID	17.1505	17.0096	17.7467	18.9872	18.7445	18.3149	17.0105	17.2027	17.2183	2			0.99654	0.000381979	142.1	96.737	142.1	-0.68938	239000000	80	2309690	0	116370	0	0	95767	0	0
	0.783625	-0.181272	+	4.05895	1.21914	+	3.60269	1.40041	Q13131	496	Q13131	Q13131	5'-AMP-activated protein kinase catalytic subunit alpha-1	PRKAA1	S				yes		ITEAKSGTATPQRSGSVSNYRSCQRSDSDAE	16.8145	16.9646	16.9344	18.2366	18.1039	18.0304	16.9094	16.6734	16.5869	2			0.78197	0.00299992	127.51	71.838	127.51	3.0533	65508000	496	1614170	0	92597	0	0	92901	0	0
	0.576118	-0.0966899	+	2.27958	-0.462952	+	2.76101	-0.366262	O75113	242	O75113	O75113	NEDD4-binding protein 1	N4BP1	T				yes		RDETVLQEEARNKAGTPVSELTKQMDTVLSS	20.2999	20.2672	20.0712	19.7581	19.8214	19.6699	20.0752	20.1509	20.122	3			0.998361	0.000597607	117.2	59.364	111.22	0.08697	554380000	242	9693540	1949.2	991050	0	0	861320	0	0
	0.125019	-0.0164096	+	2.32462	-0.270756	+	3.12589	-0.254346	Q5T200	242	Q5T200	Q5T200	Zinc finger CCCH domain-containing protein 13	ZC3H13	S						SSSASKKDRKTSAVSSPLLDQQRNSKTNQSK	20.6959	20.6224	20.5444	20.3878	20.3292	20.3334	20.5808	20.6439	20.5888	2			0.99984	3.99e-60	358.99	301.97	358.99	0.19808	1348100000	242	13767800	18221	1297400	0	0	1094500	0	0
	0.565347	-0.071736	+	2.02406	-0.33903	+	2.30898	-0.267294	P06748	243	P06748	P06748	Nucleophosmin	NPM1	S				yes		FKKQEKTPKTPKGPSSVEDIKAKMQASIEKG	19.6927	19.7693	19.5782	19.2882	19.4338	19.3011	19.606	19.6258	19.593	2			0.98639	0.000242962	176.95	114.49	117.94	-0.25281	713770000	243	6938650	4719.7	655770	0	0	615700	0	0
	0.376221	0.0969947	+	1.34449	-0.305139	+	3.2836	-0.402134	Q8TB45	244	Q8TB45	Q8TB45	DEP domain-containing mTOR-interacting protein	DEPTOR	S						ELLNEKSPSSQETHDSPFCLRKQSHDNRKST	15.6915	15.5733	15.9254	15.4669	15.3849	15.4229	15.7645	15.8514	15.8652	3			0.999987	4.35e-06	152.04	130.2	152.04	-0.57224	76592000	244	475043	0	43142	0	0	36356	0	0
	1.46678	-0.21796	+	3.33588	-1.21924	+	3.30817	-1.00128	P25054	2473	P25054	P25054	Adenomatous polyposis coli protein	APC	S			yes			ESASFESLSPSSRPASPTRSQAQTPVLSPSL	17.0413	17.2485	17.0584	15.7969	15.8069	16.0866	16.935	16.878	16.8812	4			0.985688	1.67e-12	154.69	133.69	154.69	0.51102	85255000	2473	964728	4805.7	108040	0	0	112500	0	0
	0.681272	-0.190489	+	2.49064	1.28817	+	2.81717	1.47865	Q13206	831	Q13206	Q13206	Probable ATP-dependent RNA helicase DDX10	DDX10	S						ISDTKKKQGMKKRSNSEVEDVGPTSHNRKKA	17.5714	17.2268	17.3228	18.4876	18.483	19.015	17.1952	17.0479	17.3066	3			0.805863	2.94e-11	200.45	183.21	200.45	1.4482	136710000	831	2356100	685.44	154940	0	0	110870	0	0
	0.0645421	-0.0159721	+	1.7269	0.354249	+	3.33447	0.370221	Q13263	489	Q13263	Q13263	Transcription intermediary factor 1-beta	TRIM28	S			yes			GEGEVSGLMRKVPRVSLERLDLDLTADSQPP	16.7939	17.0841	16.9964	17.2438	17.3562	17.3372	16.9348	16.9534	16.9383	3			1	8.99e-43	277.38	250.65	277.38	0.15246	52571000	489	1278470	2953.8	91314	0	0	100700	0	0
	0.233682	-0.0499452	+	3.40385	-0.955215	+	3.00037	-0.90527	Q8IY33	249	Q8IY33	Q8IY33	MICAL-like protein 2	MICALL2	S						GTFVCTSHLPAAASASPKLTGLVPRQPGAMG	17.8895	17.893	17.764	16.7909	17.0424	16.8475	17.6868	17.7755	17.9344	3			0.995638	1.25e-47	291.08	268.62	291.08	-0.44938	137930000	249	1746260	3225.1	192370	0	0	173740	0	0
	0.0464302	0.00655111	+	2.38574	-0.265264	+	2.54702	-0.271815	O60675	25	O60675	O60675	Transcription factor MafK	MAFK	S						ALKVKKEAGENAPVLSDDELVSMSVRELNQH	16.2833	16.1581	16.2187	15.9015	15.9821	15.9807	16.1818	16.2095	16.2885	2			0.999998	4.39e-13	188.19	172.07	188.19	-0.16377	147350000	25	655604	1548.7	64524	0	0	53929	0	0
	0.147424	0.111062	+	0.997599	0.578513	+	1.15344	0.467452	Q13409	101	Q13409	Q13409	Cytoplasmic dynein 1 intermediate chain 2	DYNC1I2	S						MSPSSKSVSTPSEAGSQDSGDGAVGSRTLHW	11.4848	12.296	11.7186	12.2424	12.3346	12.6579	12.1949	11.6996	11.938	2			0.88224	0.0380249	48.477	35.71	48.477	0.020274	54228000	101	40401	0	2468	0	0	3988.6	0	0
	0.684531	0.438999	+	2.76516	2.14137	+	3.83001	1.70237	Q13442	178	Q13442	Q13442	28 kDa heat- and acid-stable phosphoprotein	PDAP1	S						AKDDATLSGKRMQSLSLNK____________	17.0964	16.3406	16.2101	18.6951	18.8207	18.5554	16.8011	17.0894	17.0737	2			0.986158	0.00539115	110.08	55.66	110.08	0.14808	176930000	178	2084970	0	112170	0	0	60995	0	0
	1.09973	-0.16135	+	2.41659	-0.462532	+	1.75242	-0.301182	Q96GV9	25	Q96GV9	Q96GV9	UNC119-binding protein C5orf30	C5orf30	S				yes		RSTLTTLPFPGAEANSPGKAEAEKPRCSSTP	18.0827	17.9292	18.0636	17.6268	17.6179	17.4433	17.7889	17.9567	17.8459	3			1	1.4e-52	280.94	255.89	280.94	0.051874	315840000	25	2095590	0	219380	0	0	178030	0	0
	0.554726	0.127357	+	1.756	-0.582598	+	2.31933	-0.709956	Q9UPT5	250	Q9UPT5	Q9UPT5	Exocyst complex component 7	EXOC7	S						KEHFHKSSSSSGVPYSPAIPNKRKDTPTKKP	19.0533	18.7665	18.7894	18.5224	18.1648	18.1743	19.0768	18.9866	18.9279	3			0.999998	1.75e-05	121.42	98.3	118.54	0.13349	361440000	250	4008840	16843	424530	0	0	313110	0	0
	0.429057	0.054217	+	1.7019	-0.268559	+	2.1339	-0.322776	O15085	251	O15085	O15085	Rho guanine nucleotide exchange factor 11	ARHGEF11	S						SLMNRNSVLSDPGLDSPRTSPVIMARVAQHH	17.0619	17.046	17.1859	16.7927	16.7557	16.9398	17.1945	17.1703	17.0917	3			0.999848	1.37e-21	206.93	178.5	206.93	-0.41202	423610000	251	1222000	0	0	109570	0	0	98140	0
+	2.71163	0.657583	+	3.52961	1.35259	+	3.23217	0.695007	Q13480	419	Q13480	Q13480	GRB2-associated-binding protein 1	GAB1	S						DCYDIPRAFPSDRSSSLEGFHNHFKVKNVLT	16.215	16.5012	16.4711	17.8721	17.6297	17.7433	17.0437	17.0527	17.0636	3			0.93305	1.32e-05	153	129.55	153	-0.77904	110050000	419	1399760	384.66	61595	0	0	67971	0	0
	0.624163	-0.200027	+	1.6685	0.685199	+	2.66533	0.885225	Q13535	435	Q13535	Q13535	Serine/threonine-protein kinase ATR	ATR	S				yes		LSSNSDGISPKRRRLSSSLNPSKRAPKQTEE	15.9856	15.5372	15.93	16.4047	16.7463	16.3574	15.6733	15.6063	15.5731	2			0.989079	0.0146979	109.15	75.916	109.15	-1.2641	43623000	435	620627	0	52697	0	0	35483	0	0
	0.315309	0.196846	+	5.20098	2.58026	+	3.12196	2.38342	Q13546	320	Q13546	Q13546	Receptor-interacting serine/threonine-protein kinase 1	RIPK1	S				yes		KKEYSNENAVVKRMQSLQLDCVAVPSSRSNS	14.3587	14.4679	14.2813	17.067	16.8535	16.9282	14.8436	14.0681	14.7868	2			1	9.89e-10	183.22	166.96	183.22	-0.56225	191110000	320	554176	0	17427	0	0	17254	0	0
	0.288522	0.0383294	+	1.95823	-0.209587	+	2.02545	-0.247917	Q9UJM3	251	Q9UJM3	Q9UJM3	ERBB receptor feedback inhibitor 1	ERRFI1	S				yes		NPPPPQTHRRLRRSHSGPAGSFNKPAIRISN	18.4355	18.5515	18.5045	18.241	18.2716	18.3502	18.46	18.6043	18.5422	4			0.996997	4.83e-05	128.38	91.789	128.38	-0.075566	233890000	251	3251500	4123.6	278880	0	0	270860	0	0
	0.228992	0.0403366	+	2.58269	-0.483681	+	4.06351	-0.524017	P21359	2515	P21359	P21359	Neurofibromin;Neurofibromin truncated	NF1	S				yes		SEGYLAATYPTVGQTSPRARKSMSLDMGQPS	18.0823	17.8682	18.0522	17.5305	17.5573	17.4639	18.0182	18.0742	18.0314	2			0.999734	8.76e-44	293.63	270.75	293.63	-0.044983	374090000	2515	2171670	530.14	219320	0	0	170870	0	0
	0.307313	-0.140952	+	1.13494	-0.429828	+	1.59348	-0.288876	O60716	252	O60716	O60716	Catenin delta-1	CTNND1	S						IEERYRPSMEGYRAPSRQDVYGPQPQVRVGG	16.6642	16.4697	16.0765	16.0196	15.8878	16.0135	16.3862	16.2619	16.1395	3			1	8.64e-06	147.1	119.9	147.1	1.35	151110000	252	688803	0	83601	0	0	66545	0	0
+	2.39948	0.970196	+	2.96459	1.36399	+	2.30962	0.393795	Q13613	43	Q13613	Q13613	Myotubularin-related protein 1	MTMR1	S						PPRAAGGATAGSRQPSVETLDSPTGSHVEWC	14.6564	15.1061	15.1332	16.3916	16.2354	16.3606	16.0153	15.8401	15.9509	4			0.834646	0.00231672	63.403	49.244	63.403	-0.19348	61504000	43	560593	0	21337	0	0	26532	0	0
	0.336223	-0.126251	+	1.30385	0.399925	+	1.96309	0.526176	Q13671	351	Q13671	Q13671	Ras and Rab interactor 1	RIN1	S				yes		TSPHLGRRRPLLRSMSAAFCSLLAPERQVGR	15.4784	15.2019	15.6264	15.9303	15.8818	15.6944	15.3986	15.1245	15.4049	2			0.980988	1.58e-17	231.17	202.1	123.68	0.19702	147800000	351	439786	0	37321	0	0	28302	0	0
	0.546238	0.0868473	+	2.54437	-0.708904	+	3.15868	-0.795751	P10398	253	P10398	P10398	Serine/threonine-protein kinase A-Raf	ARAF	T						SFSTDAAGSRGGSDGTPRGSPSPASVSSGRK	16.5247	16.2862	16.3737	15.5858	15.8517	15.6204	16.4651	16.4987	16.4814	3			0.868338	0.00540075	60.943	44.45	60.943	0.31267	44956000	253	692936	1029.8	0	76031	0	0	58800	0
	0.3488	0.0704565	+	1.96334	-0.473371	+	2.96054	-0.543828	Q14244	254	Q14244	Q14244	Ensconsin	MAP7	S						RSKSTAALSGEAASCSPIIMPYKAAHSRNSM	15.6067	15.5988	15.3523	15.0288	14.9442	15.1648	15.5998	15.594	15.5753	2			0.89766	0.000171158	94.191	69.81	94.191	-0.85275	52997000	254	392241	837.06	40723	0	0	36987	0	0
	0.325286	-0.0965271	+	2.0547	0.569893	+	2.29485	0.66642	Q14134	489	Q14134	Q14134	Tripartite motif-containing protein 29	TRIM29	S						YLTPKGGVRTSYQPSSPGRFTKETTQKNFNN	18.8275	18.8271	18.569	19.384	19.1461	19.4032	18.7376	18.4722	18.7242	2			0.999528	0.000929626	126.59	96.925	126.59	-2.037	294330000	489	4638090	0	364090	0	0	326180	0	0
	0.318446	0.157978	+	1.07387	0.504242	+	1.62864	0.346265	Q14137	106	Q14137	Q14137	Ribosome biogenesis protein BOP1	BOP1	T						HSGIKKTTEEQVQASTPCPRTEMASARIGDE	16.1623	15.5394	15.5832	16.1733	16.1748	16.4495	15.9589	15.8566	15.9433	2			0.997873	3.5e-06	172.91	155.77	172.91	-1.1412	71856000	106	609270	0	59423	0	0	35535	0	0
	0.234685	-0.0481637	+	1.60217	-0.355703	+	1.83103	-0.307539	O15085	255	O15085	O15085	Rho guanine nucleotide exchange factor 11	ARHGEF11	S						RNSVLSDPGLDSPRTSPVIMARVAQHHRRQG	15.8333	15.8169	16.0497	15.4201	15.5551	15.6575	15.8361	15.8101	15.9091	3			0.913835	1.37e-21	206.93	178.5	206.93	-0.41202	203250000	255	508551	0	0	47507	0	0	42848	0
	0.0506785	-0.0136827	+	1.61222	-0.398344	+	1.85192	-0.384661	O95359	2557	O95359	O95359	Transforming acidic coiled-coil-containing protein 2	TACC2	S				yes		PKKQALYLMFDTSQESPVKSSPVRMSESPTP	19.5327	19.4535	19.2623	18.8898	18.9994	19.1642	19.4091	19.3188	19.4795	4			0.976652	5.96e-18	199.46	175.36	199.46	-0.08689	486080000	2557	5823680	8865.1	588130	0	0	497580	0	0
	0.620363	-0.167731	+	2.70415	0.778356	+	2.41912	0.946087	Q14155	694	Q14155	Q14155	Rho guanine nucleotide exchange factor 7	ARHGEF7	S				yes		TMKKLLPKRKPERKPSDEEFASRKSTAALEE	17.2842	17.3695	17.381	18.1146	17.948	18.3072	17.0175	17.4067	17.1073	3			0.999832	0.000623115	124.5	97.492	124.5	1.6234	212330000	694	1879600	6155.4	127450	0	0	122070	0	0
	0.173554	-0.0123895	+	2.39715	-0.31453	+	2.50026	-0.302141	O95359	2569	O95359	O95359	Transforming acidic coiled-coil-containing protein 2	TACC2	S				yes		SQESPVKSSPVRMSESPTPCSGSSFEETEAL	18.1831	18.2142	18.1283	17.8524	17.7845	17.9451	18.178	18.1438	18.1666	3			0.948185	7.84e-53	290.1	275.94	290.1	-0.54495	273090000	2569	2502480	2509.6	234890	0	0	215750	0	0
	0.546238	0.0868473	+	2.54437	-0.708904	+	3.15868	-0.795751	P10398	257	P10398	P10398	Serine/threonine-protein kinase A-Raf	ARAF	S						DAAGSRGGSDGTPRGSPSPASVSSGRKSPHS	16.5247	16.2862	16.3737	15.5858	15.8517	15.6204	16.4651	16.4987	16.4814	3			0.955717	0.00540075	60.943	44.45	60.943	0.31267	44956000	257	692936	1029.8	0	76031	0	0	58800	0
	0.767101	0.0615705	+	2.46775	-0.234173	+	4.22963	-0.295743	P04049	259	P04049	P04049	RAF proto-oncogene serine/threonine-protein kinase	RAF1	S		yes		yes		SPSSEGSLSQRQRSTSTPNVHMVSTTLPVDS	18.4599	18.4911	18.3728	18.1989	18.1901	18.2323	18.5233	18.4972	18.488	2			0.965256	2.11e-52	313.45	285.36	313.45	-0.91521	869250000	259	3123120	3467.5	283550	0	0	260050	0	0
	0.0165248	-0.0102584	+	1.83945	-0.791494	+	2.71273	-0.781235	Q15942	259	Q15942	Q15942	Zyxin	ZYX	S						PVSLANTQPRGPPASSPAPAPKFSPVTPKFT	21.2259	20.9333	20.5903	20.2107	20.0239	20.1404	21.0604	20.7383	20.92	2			0.990492	3.57e-08	186.5	148.21	179.83	-0.026288	1296900000	259	15273000	9354.3	1517700	342720	0	1077600	272120	0
	0.23904	0.0664565	+	3.16378	0.718115	+	2.60593	0.651659	Q14160	1342	Q14160	Q14160	Protein scribble homolog	SCRIB	T			yes			VPTSHPPEDAPAQPPTPGPAASPEQLSFRER	14.9492	14.7342	14.7833	15.6175	15.4991	15.5046	14.845	14.7627	15.0584	3			0.999829	8.39e-06	93.146	85.341	93.146	-0.82352	105750000	1342	329631	0	16265	9773.8	0	14554	6093.7	0
	0.114707	-0.0428886	+	1.54759	0.511264	+	1.78878	0.554153	Q14160	1581	Q14160	Q14160	Protein scribble homolog	SCRIB	S			yes			SPDFAEELRSLEPSPSPGPQEEDGEVALVLL	12.0158	11.847	12.2125	12.3407	12.5485	12.7198	11.9064	11.8877	12.1524	3			0.798975	0.0346154	44.264	35.445	44.264	1.3939	3655100	1581	43569.9	0	3541.5	0	0	2946.8	0	0
	0.118579	-0.0381521	+	3.27571	0.661048	+	2.3294	0.6992	Q14160	853	Q14160	Q14160	Protein scribble homolog	SCRIB	S			yes			ERRGGGLRLPLLPPESPGPLRQRHVACLARS	17.3846	17.2629	17.2787	17.9284	17.9065	18.0744	17.3723	17.0493	17.3901	4			1	9.47e-07	174.94	92.089	116.24	0.35538	303380000	853	1792860	1682.9	136460	0	0	113600	0	0
	0.219951	-0.029878	+	2.06345	-0.302689	+	1.98811	-0.272811	Q6Y7W6	26	Q6Y7W6	Q6Y7W6	PERQ amino acid-rich with GYF domain-containing protein 2	GIGYF2	S						GPEWLRALSSGGSITSPPLSPALPKYKLADY	20.4153	20.3333	20.2774	19.9589	20.0319	20.1271	20.2614	20.3783	20.2967	2			0.986981	1.38e-31	248.06	197.97	161.19	0.28868	2869400000	26	11253500	17100	701810	370230	0	656140	244430	0
	1.37842	0.285768	+	2.78378	0.753526	+	2.45772	0.467758	Q14185	1772	Q14185	Q14185	Dedicator of cytokinesis protein 1	DOCK1	T						VSPSSPSSQQTPPPVTPRAKLSFSMQSSLEL	14.2168	14.131	14.4097	14.9244	14.9799	15.1137	14.4457	14.5485	14.6205	3			0.999664	0.00786298	57.21	44.937	57.21	-0.040671	46494000	1772	236622	0	15824	0	0	13747	0	0
	1.04195	-0.387155	+	1.87149	1.04297	+	2.78521	1.43012	Q14241	163	Q14241	Q14241	Transcription elongation factor B polypeptide 3	TCEB3	S						RSYSPDHRQKKHRKLSELERPHKVSHGHERR	15.1691	14.7668	15.3274	15.8513	16.0683	16.4727	14.6941	14.6154	14.7924	4			1	0.00473072	95.631	69.619	95.631	0.81644	37235000	163	423348	584.93	30240	0	0	21106	0	0
	0.231035	0.0202916	+	3.35892	0.426807	+	3.11853	0.406516	Q14671	709	Q14671	Q14671	Pumilio homolog 1	PUM1	S				yes		TAVANSNTGSGSRRDSLTGSSDLYKRTSSSL	20.1089	20.153	20.0821	20.5153	20.4996	20.6094	20.0902	20.1852	20.1294	3			0.999924	1.47e-06	170.16	143.38	170.16	-0.09143	2020700000	709	11814000	20748	870350	0	0	797490	0	0
+	2.93855	0.778753	+	3.53202	1.84881	+	2.84342	1.07006	Q14678	1350	Q14678	Q14678	KN motif and ankyrin repeat domain-containing protein 1	KANK1	S			yes			PRLGRKTSPGPTHRGSFD_____________	13.3524	13.6458	13.463	15.5373	15.09	15.3803	14.3167	14.2906	14.19	3			0.999996	0.000510749	108.06	79.953	108.06	-0.32629	21432000	1350	230425	0	8789.5	0	0	9911.2	0	0
	1.15438	-0.199805	+	2.22417	-0.622592	+	1.63114	-0.422787	P49792	2613	P49792	P49792	E3 SUMO-protein ligase RanBP2	RANBP2	T						ASFPTEESSINYTFKTPEKAKEKKKPEDSPS	18.0043	17.8366	18.0041	17.2993	17.5152	17.1628	17.6598	17.8607	17.7251	3			0.998213	1e-21	207.46	178.08	207.46	0.029596	278290000	2613	1905200	0	207990	0	0	167260	0	0
	0.608784	-0.102169	+	1.32001	0.411449	+	1.72848	0.513618	Q14684	706	Q14684	Q14684	Ribosomal RNA processing protein 1 homolog B	RRP1B	S			yes	yes		NMTAEFKKTDKSILVSPTGPSRVAFDPEQKP	16.1866	16.3091	16.0776	16.5003	16.4472	16.8602	16.0552	16.0535	16.158	2			0.999968	4.91e-10	219.89	156.71	219.89	-0.68025	159660000	706	752092	0	60416	0	0	59712	0	0
	0.392637	-0.0931479	+	2.46794	0.612601	+	2.91962	0.705749	Q14684	736	Q14684	Q14684	Ribosomal RNA processing protein 1 homolog B	RRP1B	S			yes			PLHGVLKTPTSSPASSPLVAKKPLTTTPRRR	19.3854	19.1546	19.1453	19.8134	19.7546	19.9551	19.0124	19.2129	19.1806	2			0.997806	1.7e-17	229.9	178.98	229.9	-0.076256	536400000	736	6627350	13042.3	381820	150260	0	285690	121090	0
	1.6667	0.188604	+	2.79524	-0.237614	+	3.28752	-0.426217	Q9H0J9	263	Q9H0J9	Q9H0J9	Poly [ADP-ribose] polymerase 12	PARP12	S						VPQGTSERKDSSGSVSPNTLSQEEGDQICLY	17.1792	17.2854	17.2397	17.0044	16.9863	17.0008	17.3539	17.4969	17.4194	3			0.832115	6.61e-53	286.93	254.84	67.463	2.1839	177540000	263	1402840	3770	118670	0	0	115340	0	0
+	2.00864	0.547486	+	2.66595	0.903723	+	2.33096	0.356237	Q147X3	190	Q147X3	Q147X3	N-alpha-acetyltransferase 30	NAA30	S				yes		QEEEEEDEQVRLLSSSLTADCSLRSPSGREV	14.0119	13.6192	13.8798	14.6271	14.798	14.797	14.4354	14.3501	14.3678	2			0.942849	0.000248813	119.62	95.191	119.62	-0.70096	32631000	190	197553	0	13765	0	0	9735.1	0	0
	0.285733	-0.0704161	+	2.0168	-0.479543	+	1.47512	-0.409127	Q9H4L5	265	Q9H4L5	Q9H4L5	Oxysterol-binding protein-related protein 3	OSBPL3	S						YSAPAINAIQGGSFESPKKEKRSHRRWRSRA	19.1842	19.0304	19.098	18.5108	18.8088	18.5545	18.939	18.9509	19.2115	4			0.997718	6.7e-17	181.62	162.51	181.62	0.70532	209250000	265	4537770	4946.4	464050	0	0	374110	0	0
	0.412834	-0.123698	+	2.11852	-0.604397	+	2.09893	-0.480699	Q8IWB9	266	Q8IWB9	Q8IWB9	Testis-expressed sequence 2 protein	TEX2	S				yes		TQPRNTGGDSKTAPSSPLTSPSDTRSFFKVP	15.5776	15.8877	15.8881	15.2366	15.2505	15.0532	15.8037	15.6246	15.554	2			0.872049	1.11e-22	258.39	225.01	258.39	0.43919	62170000	266	435480	0	39924	0	0	44944	0	0
	0.531394	-0.122451	+	1.60882	-0.399228	+	1.73085	-0.276777	Q8N1G0	266	Q8N1G0	Q8N1G0	Zinc finger protein 687	ZNF687	S						SASPPPVAGVPFFKQSPGHQSPLASPKVPVC	17.537	17.8656	17.7074	17.2649	17.4266	17.2208	17.5427	17.653	17.5469	2			1	3.3e-06	124.68	95.372	124.68	0.087211	147990000	266	1719330	4299.8	0	74080	77281	0	76465	94090
	0.503031	-0.0841757	+	2.3363	-0.448441	+	3.16901	-0.364265	Q15942	267	Q15942	Q15942	Zyxin	ZYX	S				yes		PRGPPASSPAPAPKFSPVTPKFTPVASKFSP	21.8301	21.8002	21.6043	21.3303	21.3296	21.2294	21.6244	21.6737	21.684	2			0.999392	1.68e-13	197.28	177.21	109.48	0.91437	2628100000	267	28285000	30513.6	2463400	342720	0	2149600	272120	0
	0.522886	-0.0973428	+	1.85418	0.307095	+	3.16762	0.404437	Q14847	146	Q14847	Q14847	LIM and SH3 domain protein 1	LASP1	S				yes		MGPSGGEGMEPERRDSQDGSSYRRPLEQQQP	19.4709	19.6689	19.4396	19.808	19.8635	19.8291	19.3923	19.3875	19.5077	3			1	1.14e-58	302.36	263.42	302.36	-0.78662	2654100000	146	7341680	4653.6	563930	0	0	575380	0	0
	0.159598	-0.0297476	+	3.55079	-0.639762	+	3.0759	-0.610015	Q9Y520	2673	Q9Y520	Q9Y520	Protein PRRC2C	PRRC2C	T				yes		MELKAFGSGIDIKPGTPPIAGRSTTPTSSPF	20.4418	20.5792	20.499	19.8602	19.932	19.8086	20.39	20.5855	20.4553	3			1	2.59e-09	155.91	137.17	155.91	1.1256	2085100000	2673	11736800	20228	1091500	0	0	1063100	0	0
+	2.96154	0.529644	+	3.96932	1.30314	+	2.90126	0.773494	Q14C86	902	Q14C86	Q14C86	GTPase-activating protein and VPS9 domain-containing protein 1	GAPVD1	S				yes		FKQRHSYPERLVRSRSSDIVSSVRRPMSDPS	19.3424	19.4517	19.4243	20.7939	20.7821	20.5519	19.8328	20.0138	19.9608	3			0.989219	5.39e-08	184.22	146.69	175.6	-0.047197	3055400000	902	10838600	14367	516730	0	0	497000	0	0
	1.03975	-0.17067	+	1.66746	0.516418	+	2.29416	0.687087	Q15021	1333	Q15021	Q15021	Condensin complex subunit 1	NCAPD2	S				yes		KPSTGSRYQPLASTASDNDFVTPEPRRTTRR	16.9757	16.987	17.1996	17.5016	17.8053	17.4047	16.8707	16.8474	16.9322	3			0.834266	5.93e-43	290.88	278.32	146.06	-0.46351	432740000	1333	1390590	1363.4	103330	0	0	94312	0	0
	0.0936634	0.0210679	+	3.74515	-1.08455	+	4.07785	-1.10562	Q9Y520	2680	Q9Y520	Q9Y520	Protein PRRC2C	PRRC2C	S						SGIDIKPGTPPIAGRSTTPTSSPFRATSTSP	18.4491	18.3744	18.2286	17.1722	17.2913	17.3349	18.4017	18.4349	18.2787	2			0.750438	1.45e-05	191.55	126.28	191.55	-0.24685	143740000	2680	2474530	0	281470	0	0	240370	0	0
	0.225243	-0.0372569	+	4.28669	-1.1267	+	4.92537	-1.08945	Q9Y520	2682	Q9Y520	Q9Y520	Protein PRRC2C	PRRC2C	T						IDIKPGTPPIAGRSTTPTSSPFRATSTSPNS	20.7553	20.6046	20.5743	19.4679	19.5443	19.5419	20.6683	20.5964	20.5578	2			0.99979	5.3e-21	281.88	196.06	281.88	0.16656	1523800000	2682	11857700	734.52	1350900	0	0	1081400	0	0
	0.544941	0.156422	+	1.81528	-0.38448	+	1.60684	-0.540901	O75128	269	O75128	O75128	Protein cordon-bleu	COBL	S						VNKRSNSKGCLTTPNSPSMHSRSLTLGPSLS	17.7184	17.6355	17.6532	17.4473	17.1318	17.2746	18.0669	17.7565	17.653	3			0.996835	6.06e-05	136.35	123.58	136.35	-0.013063	88805000	269	1826030	616.15	171230	0	0	146050	0	0
	1.663	-0.152651	+	3.5489	-0.575567	+	3.59092	-0.422916	Q13501	269	Q13501	Q13501	Sequestosome-1	SQSTM1	T				yes		EVDIDVEHGGKRSRLTPVSPESSSTEEKSSS	20.7128	20.6997	20.593	20.1355	20.1078	20.0356	20.5453	20.5177	20.4846	2			0.996968	8.16e-10	183.36	161.8	183.36	-0.17343	5633300000	269	12832100	26252	849610	462770	0	724490	428520	0
	0.160871	-0.0295245	+	2.12716	-0.307927	+	2.6199	-0.278402	Q6WCQ1	269	Q6WCQ1	Q6WCQ1	Myosin phosphatase Rho-interacting protein	MPRIP	S						RMDCGRKVRVESGYFSLEKTKQDLKAEEQQL	15.0607	15.263	15.1768	14.8702	14.884	14.8225	15.12	15.085	15.2069	2			1	0.000365462	142.83	109.88	142.83	-2.0811	39083000	269	308480	0	28091	0	0	29493	0	0
+	2.12595	0.915301	+	3.22664	1.61302	+	2.91578	0.697716	Q15032;Q9UBL0	282;280	Q15032	Q15032	R3H domain-containing protein 1;cAMP-regulated phosphoprotein 21	R3HDM1;ARPP21	S						DNQMRIRLKDDRRSKSIEEREEEYQRARDRI	17.1396	17.35	16.7918	18.7395	18.6916	18.6893	17.8488	18.0475	18.1309	3			0.941014	4.24e-06	155.49	110.23	155.49	-0.031706	367900000	282	2653820	2387.1	115510	0	0	120470	0	0
	0.24567	-0.0572611	+	3.2413	-0.848053	+	3.47544	-0.790792	Q8IVT5	270	Q8IVT5	Q8IVT5	Kinase suppressor of Ras 1	KSR1	T						HASGRLTPRALHSFITPPTTPQLRRHTKLKP	15.6276	15.6959	15.4476	14.6588	14.7733	14.7949	15.5217	15.6332	15.4444	3			0.999818	0.00150792	102.03	93.686	102.03	0.79499	52692000	270	369583	0	41306	0	0	39489	0	0
	0.0823305	0.0495087	+	3.45075	2.2474	+	3.81836	2.19789	Q15032	299	Q15032	Q15032	R3H domain-containing protein 1	R3HDM1	S						EEREEEYQRARDRIFSQDSLCSQENYIIDKR	12.7392	12.2604	12.8152	14.6984	14.8233	15.0353	12.6056	12.8871	12.4706	4			0.99993	0.00138292	77.19	56.299	77.19	-0.48521	26793000	299	135570	0	5792.4	0	0	3894.2	0	0
	1.15095	0.182702	+	3.53628	0.861965	+	3.80413	0.679262	Q15032	381	Q15032	Q15032	R3H domain-containing protein 1	R3HDM1	S				yes		DSSLRNLKPAVTKASSFSGISVLTRGDSSGS	18.1225	18.338	18.1732	19.0832	19.124	19.0124	18.3874	18.3341	18.4603	2			0.982878	4.32e-33	297.76	246.97	297.76	0.61086	563840000	381	3736090	0	225400	0	0	234550	0	0
	0.418707	0.188613	+	2.62331	1.30352	+	2.36824	1.1149	Q15056	21	Q15056	Q15056	Eukaryotic translation initiation factor 4H	EIF4H	S						TYDDRAYSSFGGGRGSRGSAGGHGSRSQKEL	16.779	17.2477	17.0022	18.3404	18.5302	18.0689	17.2044	16.9596	17.4307	3			0.999715	0.025835	55.414	38.783	55.414	0.36167	276650000	21	1914300	0	90390	0	0	112440	0	0
	0.531394	-0.122451	+	1.60882	-0.399228	+	1.73085	-0.276777	Q8N1G0	271	Q8N1G0	Q8N1G0	Zinc finger protein 687	ZNF687	S						PVAGVPFFKQSPGHQSPLASPKVPVCQPLKE	17.537	17.8656	17.7074	17.2649	17.4266	17.2208	17.5427	17.653	17.5469	2			0.999994	3.3e-06	124.68	95.372	124.68	0.087211	147990000	271	1719330	4299.8	0	74080	77281	0	76465	94090
+	2.18259	0.708277	+	3.7511	1.87703	+	4.27033	1.16875	Q15121	104	Q15121	Q15121	Astrocytic phosphoprotein PEA-15	PEA15	S						ISEEDELDTKLTRIPSAKKYKDIIRQPSEEE	16.0157	15.8181	15.565	17.7638	17.5906	17.6756	16.4278	16.5401	16.5558	3			0.999394	0.0258124	65.395	44.023	65.395	-0.13201	82524000	104	1147900	1144.8	53784	0	0	42882	0	0
	0.353487	0.10796	+	2.24913	-0.709812	+	4.14955	-0.817772	Q15058	272	Q15058	Q15058	Kinesin-like protein KIF14	KIF14	S						RSIGKEIAKTSNKFGSLEKRTPTKCTTEHKL	17.832	18.2072	17.8356	17.3019	17.2758	17.1676	18.0161	18.0954	18.0872	3			0.997913	0.0351434	51.147	25.281	51.147	0.80689	121650000	272	2062500	10204	184990	0	0	214730	0	0
	0.668333	0.341306	+	1.53239	0.776751	+	1.58311	0.435445	Q15121	116	Q15121	Q15121	Astrocytic phosphoprotein PEA-15	PEA15	S						RIPSAKKYKDIIRQPSEEEIIKLAPPPKKA_	20.8232	21.2997	20.566	21.6027	21.8559	21.5606	21.0721	21.3628	21.2779	2			1	2.1e-22	250.55	201.84	127.02	-0.64201	5653600000	116	24388900	21553	1414700	0	0	1728000	0	0
	0.324173	0.245793	+	1.1995	0.708288	+	1.43161	0.462495	Q15149	4030	Q15149	Q15149	Plectin	PLEC	T				yes		SDARKLTFRGLRKQITMEELVRSQVMDEATA	21.7315	22.5696	21.7573	22.7969	22.713	22.6734	22.1527	22.5545	22.0886	2			1	7.89e-06	190.41	140.32	145.81	-0.92326	6346500000	4030	51208500	93493	2624100	0	0	4068400	0	0
	1.43799	0.108843	+	3.14812	0.563911	+	2.85021	0.455067	Q15149	4389	Q15149	Q15149	Plectin	PLEC	S				yes		SGNAGGFRSRSSSVGSSSSYPISPAVSRTQL	16.8151	16.7225	16.7843	17.4086	17.3718	17.2333	16.921	16.8838	16.8437	2			0.774326	5.56e-61	321.93	297.64	321.93	-0.048915	406460000	4389	1227250	0	0	92638	0	0	78908	0
	2.07143	-0.188489	+	4.91552	-1.06356	+	4.56768	-0.875067	Q12802	2728	Q12802	Q12802	A-kinase anchor protein 13	AKAP13	S				yes		PSIAKSGSLDSELSVSPKRNSISRTHKDKGP	19.6368	19.5459	19.5675	18.5408	18.5569	18.4618	19.3708	19.4504	19.3636	3			0.999689	1.24e-06	166.62	123.65	166.62	0.28365	636770000	2728	5478090	4537.6	631300	0	0	529580	0	0
	0.372072	0.0807152	+	2.15761	-0.427192	+	3.32707	-0.507907	Q7Z2W4	273	Q7Z2W4	Q7Z2W4	Zinc finger CCCH-type antiviral protein 1	ZC3HAV1	T						QEFLASASASAERSCTPSPDQISHRASLEDA	18.6762	18.5813	18.4022	18.1686	18.1218	18.0877	18.6934	18.5517	18.6568	3			0.886767	0.000253325	141.85	118.62	98.58	-0.0034388	441590000	273	3255710	6845.5	186280	142180	0	138920	137450	0
	1.70979	0.24427	+	3.24184	0.698877	+	2.41393	0.454608	Q15149	4390	Q15149	Q15149	Plectin	PLEC	S						GNAGGFRSRSSSVGSSSSYPISPAVSRTQLA	18.774	18.7165	18.8585	19.5135	19.5607	19.3715	19.0526	19.0981	18.9311	2			0.943579	1.45e-17	222.86	205.58	222.86	0.16623	546580000	4390	5362220	13658	0	351060	0	0	302730	0
	1.17866	-0.220604	+	4.46777	-1.84983	+	4.91009	-1.62922	Q9UJU6	275	Q9UJU6	Q9UJU6	Drebrin-like protein	DBNL	S						IFKQKERAMSTTSISSPQPGKLRSPFLQKQL	20.4712	20.3692	20.2038	18.4226	18.5824	18.4896	20.2055	20.0673	20.1096	2			0.936245	2.93e-48	332.08	293.28	332.08	-0.85747	586680000	275	8297710	0	1113500	0	0	922710	0	0
	2.00331	-0.0557321	+	4.48911	-0.351052	+	4.71655	-0.29532	P14859	276	P14859	P14859	POU domain, class 2, transcription factor 1	POU2F1	T						IQTLPQSQSTPKRIDTPSLEEPSDLEELEQF	18.742	18.717	18.7016	18.3659	18.3497	18.3918	18.6697	18.6612	18.6624	3			0.996501	1.36e-83	343.68	314.04	250.95	-0.52544	514960000	276	3578830	3140.6	343510	0	0	302840	0	0
	1.0109	-0.252196	+	2.278	1.47771	+	2.57368	1.7299	Q15149	4406	Q15149	Q15149	Plectin	PLEC	S						SSYPISPAVSRTQLASWSDPTEETGPVAGIL	16.1993	15.875	16.0556	17.2662	17.2739	18.0228	15.6707	15.7895	15.9131	3			0.952235	4.33e-12	143.75	132.65	143.75	0.48135	88157000	4406	1021600	739.61	60942	0	0	44559	0	0
	0.689684	0.141675	+	2.20071	-0.489161	+	2.22402	-0.630836	P53814	277	P53814	P53814	Smoothelin	SMTN	S						VNKLLSGPKETPAAQSPTRGPSDTKRADVAG	16.2883	16.2921	16.1663	15.8697	15.8138	15.5959	16.376	16.5427	16.2532	4			0.906364	1.87e-07	159.74	120.36	159.74	0.15404	78624000	277	660303	0	64742	0	0	59031	0	0
	0.147315	-0.017608	+	2.88412	-0.299301	+	2.09754	-0.281693	Q14244	277	Q14244	Q14244	Ensconsin	MAP7	T						AAHSRNSMDRPKLFVTPPEGSSRRRIIHGTA	17.6964	17.6869	17.7081	17.3333	17.4607	17.3994	17.6244	17.6475	17.7666	2			1	7.64e-11	224.25	180.06	224.25	-0.12135	105010000	277	1797490	0	168690	0	0	151200	0	0
+	2.30611	-0.443211	+	4.24863	1.39087	+	5.6652	1.83408	Q15154	93	Q15154	Q15154	Pericentriolar material 1 protein	PCM1	S						KTPHTFPHSRYMSQMSVPEQAELEKLKQRIN	17.805	17.5745	17.6121	19.0059	19.109	19.0492	17.1708	17.2065	17.2846	2			1	6.4e-15	219.01	182.24	219.01	-0.56453	358990000	93	2846750	0	181630	0	0	140160	0	0
	0.710658	-0.0917187	+	3.0285	-0.77294	+	2.61988	-0.681221	O95817	279	O95817	O95817	BAG family molecular chaperone regulator 3	BAG3	S						SPFRSSVQGASSREGSPARSSTPLHSPSPIR	19.3531	19.3891	19.3005	18.7433	18.4962	18.4843	19.3449	19.2613	19.1614	2			1	3.97e-12	196.43	167.16	196.43	-0.43838	1924800000	279	5026210	4661	0	389590	130920	0	383420	93026
	0.768253	0.104535	+	3.60796	-0.376089	+	2.94841	-0.480624	P53814	279	P53814	P53814	Smoothelin	SMTN	T						KLLSGPKETPAAQSPTRGPSDTKRADVAGPR	15.3737	15.4577	15.3755	15.0497	15.0223	15.0066	15.5311	15.5897	15.3997	3			0.759788	0.0105013	63.754	47.26	63.754	-3.7157	42967000	279	371692	189.27	34757	0	0	33632	0	0
	0.408493	-0.146413	+	1.41627	0.754052	+	1.88349	0.900465	Q15345	276	Q15345	Q15345	Leucine-rich repeat-containing protein 41	LRRC41	S				yes		PPCRLCGEASRGRAPSRDEGSLLLGSRRPRR	14.0706	13.8178	13.5814	14.459	14.2988	14.9742	13.7869	13.5986	13.6451	3			0.999994	2.37e-05	122.19	102.1	122.19	-0.63591	78080000	276	162835	0	14326	0	0	11130	0	0
+	2.19826	-0.468432	+	3.05854	0.84262	+	4.74887	1.31105	Q15390	119	Q15390	Q15390	Mitochondrial fission regulator 1	MTFR1	S						QDDLLFFEKAPSRQISLPDLSQEEPQLKTPA	16.0652	16.3303	16.0978	16.9207	17.067	17.0335	15.6507	15.7577	15.6798	2			1	1.53e-10	198.42	148.99	141.13	-0.0051746	145860000	119	795620	0	55626	0	0	60575	0	0
	0.271049	-0.0410347	+	2.11994	-0.272898	+	2.1742	-0.231864	P52564	28	P52564	P52564	Dual specificity mitogen-activated protein kinase kinase 6	MAP2K6	T						LKIPKEAFEQPQTSSTPPRDLDSKACISIGN	18.7195	18.5598	18.5968	18.3994	18.31	18.348	18.6532	18.5278	18.5719	3			0.985335	2.87e-32	249.48	211.24	249.48	0.49246	570940000	28	3422340	0	338290	0	0	272370	0	0
	0.157945	-0.0452442	+	1.90485	-0.452351	+	3.1839	-0.407107	Q16637	28	Q16637	Q16637	Survival motor neuron protein	SMN1	S						PEQEDSVLFRRGTGQSDDSDIWDDTALIKAY	19.6164	19.8309	19.4815	19.1472	19.1914	19.2332	19.5459	19.6626	19.5846	2			0.997479	2.05e-42	275.17	217.65	181.41	-0.27173	3304500000	28	6647520	4678.4	521520	101090	0	572260	69540	0
	0.467443	-0.0855713	+	3.05759	-0.753999	+	4.52228	-0.668428	Q96N67	28	Q96N67	Q96N67	Dedicator of cytokinesis protein 7	DOCK7	S						RTVAAEVRKQISGQYSGSPQLLKNLNIVGNI	16.6378	16.4014	16.4013	15.7066	15.7864	15.6855	16.3848	16.4104	16.3886	2			0.921571	1.73e-06	168.69	120.97	168.69	0.4729	86274000	28	691158	0	82113	0	0	63546	0	0
	0.0299684	-0.0131048	+	3.58843	-1.42181	+	3.44549	-1.40871	Q8WUF5	280	Q8WUF5	Q8WUF5	RelA-associated inhibitor	PPP1R13L	S			yes			QTASYERLDVFARPASPSLQLLPWRESSLDG	20.1291	20.121	19.8292	18.6164	18.7053	18.4922	20.2073	20.0033	19.8294	3			0.839489	1.61e-14	200.95	179.15	200.95	0.21619	1182400000	280	7496470	26894	882420	0	0	780490	0	0
	0.611224	-0.14264	+	3.07372	-1.3781	+	2.89259	-1.23546	Q99704	281	Q99704	Q99704	Docking protein 1	DOK1	S						RADSHEGEVAEGKLPSPPGPQELLDSPPALY	14.6786	14.7644	14.9309	13.2471	13.6784	13.3141	14.5064	14.7552	14.6843	4			0.99487	9.15e-15	134.73	122.14	134.73	0.086157	62574000	281	193566	925.11	21663	0	0	21071	0	0
	0.304224	-0.40433	+	2.2712	3.26212	+	3.93274	3.66645	Q15418	380	Q15418	Q15418	Ribosomal protein S6 kinase alpha-1	RPS6KA1	S				yes		GIPPSAGAHQLFRGFSFVATGLMEDDGKPRA	15.007	13.3125	14.8525	17.7301	18.0337	17.1946	13.9804	13.9907	13.988	3			0.99833	1.3e-30	270.35	240.28	270.35	-0.00029044	227610000	380	806192	0	27085	0	0	7916.2	0	0
	0.324524	-0.0570787	+	2.2571	-0.718305	+	2.30221	-0.661226	Q9UHR4	281	Q9UHR4	Q9UHR4	Brain-specific angiogenesis inhibitor 1-associated protein 2-like protein 1	BAIAP2L1	S						RSNVVRKDYDTLSKCSPKMPPAPSGRAYTSP	19.3145	19.3768	19.1552	18.4097	18.7871	18.4946	19.1684	19.2675	19.2392	3			0.963464	0.00103984	130.07	96.383	94.09	0.88649	424630000	281	4910120	17714	507040	0	0	472500	0	0
	0.422009	-0.146462	+	3.43876	1.45737	+	3.36036	1.60383	Q15545	171	Q15545	Q15545	Transcription initiation factor TFIID subunit 7	TAF7	S						YIESPDVEKEVKRLLSTDAEAVSTRWEIIAE	13.8802	14.0042	14.191	15.2949	15.5684	15.5843	14.0557	13.657	13.9233	2			0.980671	3.98e-06	162.67	100.2	162.67	-0.15865	34503000	171	244267	0	12586	0	0	12621	0	0
	1.10649	-0.295921	+	4.67618	1.69423	+	4.16557	1.99015	Q15691	155	Q15691	Q15691	Microtubule-associated protein RP/EB family member 1	MAPRE1	S			yes			SLVAPALNKPKKPLTSSSAAPQRPISTQRTA	16.7267	16.5655	16.7695	18.457	18.3238	18.3637	16.5566	16.1846	16.4328	4			0.989449	1.7e-12	178.69	161.4	178.69	-0.039212	2041700000	155	1690500	0	87236	0	0	70984	0	0
	2.46505	-0.0692724	+	3.39802	-0.288682	+	2.90521	-0.21941	Q96JM3	282	Q96JM3	Q96JM3	Chromosome alignment-maintaining phosphoprotein 1	CHAMP1	S						SRKSARTTSPEPRKPSPSESPEPWKPFPAVS	19.4684	19.4487	19.4468	19.217	19.139	19.1419	19.3804	19.4024	19.3733	3			0.933131	1.36e-13	162.44	139.55	162.44	0.32341	1347200000	282	6014100	1681.2	153000	349270	60756	126860	314380	54760
	0.0758986	-0.0196609	+	1.94624	-0.385178	+	3.46146	-0.365517	Q9NXR1	282	Q9NXR1	Q9NXR1	Nuclear distribution protein nudE homolog 1	NDE1	S						LESKLASCRNLVYDQSPNRTGGPASGRSSKN	16.6285	16.9211	16.7271	16.3928	16.3531	16.3752	16.7627	16.6794	16.7755	2			1	3.4e-05	177.81	128.87	177.81	2.6754	78630000	282	918169	0	81596	0	0	90219	0	0
	0.453128	-0.177602	+	1.47292	0.413478	+	1.89551	0.59108	Q15742	162	Q15742	Q15742	NGFI-A-binding protein 2	NAB2	S						SPGEKAGSARSFSPKSPLELGEKLSPLPGGP	15.1756	14.8959	14.7896	15.2684	15.3552	15.478	14.6699	14.636	15.0225	2			0.96138	0.0299681	54.598	21.189	54.598	1.6157	0	162	313243	587.16	30375	0	0	23026	0	0
	0.4572	-0.113859	+	2.02679	-0.564344	+	2.58203	-0.450485	Q8N556	283	Q8N556	Q8N556	Actin filament-associated protein 1	AFAP1	S						HKAELEKKLSSERPSSDGEGVVENGITTCNG	17.2703	17.5067	17.1545	16.7797	16.8315	16.6273	17.1896	17.2487	17.1516	3			0.867382	2.35e-12	150.68	138.9	150.68	0.021212	412300000	283	1260370	0	126250	0	0	133900	0	0
	0.82804	-0.202539	+	1.4904	0.51381	+	2.35283	0.716349	Q16513	121	Q16513	Q16513	Serine/threonine-protein kinase N2	PKN2	T						HIVVSDPEDITDCPRTPDTPNNDPRCSTSNN	17.1459	17.0448	16.7858	17.4789	17.316	17.723	16.7797	16.8577	16.7315	4			0.903443	1.15e-25	184.78	165.7	184.78	0.64502	230580000	121	1327900	1278.3	116010	0	0	98062	0	0
	0.804521	-0.0890808	+	2.62689	0.762435	+	2.9347	0.851516	Q16513	583	Q16513	Q16513	Serine/threonine-protein kinase N2	PKN2	S				yes		FDLEPEPPPAPPRASSLGEIDESSELRVLDI	18.568	18.4153	18.4444	19.1778	19.1022	19.4351	18.4075	18.3454	18.4076	2			0.999187	4.73e-106	414.65	355.5	414.65	0.10121	852840000	583	4147480	0	305180	0	0	247090	0	0
	0.433464	0.156623	+	3.41135	1.6821	+	4.36337	1.52548	Q16539	182	Q16539	Q16539	Mitogen-activated protein kinase 14	MAPK14	Y						LDFGLARHTDDEMTGYVATRWYRAPEIMLNW	17.107	17.3401	16.8444	18.8408	18.6724	18.8246	17.2811	17.3389	17.1415	3			0.999991	1.26e-47	320.94	281.28	187.11	0.1226	364790000	182	2375080	1215.8	112980	0	0	119670	0	0
	1.52457	0.265713	+	2.04763	-0.284004	+	2.47999	-0.549717	Q09666	2845	Q09666	Q09666	Neuroblast differentiation-associated protein AHNAK	AHNAK	T						FKTPKISMPDIDLNLTGPKIKGDVDVTGPKV	15.7631	15.8759	15.7872	15.5441	15.5982	15.4319	16.0937	15.9398	16.1898	2			1	1.98e-09	197.73	174.85	197.73	-0.31616	76912000	2845	526314	0	45295	0	0	44586	0	0
+	2.14229	0.719168	+	3.64848	1.11739	+	1.57392	0.398218	Q16576	95	Q16576	Q16576	Histone-binding protein RBBP7	RBBP7	S						VARVHIPNDDAQFDASHCDSDKGEFGGFGSV	17.2252	16.9459	17.0031	18.2198	18.1655	18.1411	17.9762	17.5816	17.7738	4			0.999995	3.89e-60	280.78	264.42	280.78	0.46933	240100000	95	2086270	9886.2	122440	0	0	91736	0	0
	0.0454555	0.0111602	+	2.35896	0.304802	+	1.6929	0.293642	Q16643	601	Q16643	Q16643	Drebrin	DBN1	S			yes			TQKEGTQASEGYFSQSQEEEFAQSEELCAKA	15.4631	15.5001	15.3583	15.7624	15.7881	15.6854	15.4902	15.5533	15.3115	3			0.951859	1.4e-05	102.95	90.017	102.95	0.92232	20465000	601	439776	263.53	36934	0	0	34605	0	0
	0.931199	0.25905	+	4.53693	1.91205	+	3.61275	1.653	Q16851	13	Q16851	Q16851	UTP--glucose-1-phosphate uridylyltransferase	UGP2	S						___MSRFVQDLSKAMSQDGASQFQEVIRQEL	14.1485	14.0225	13.9422	16.0647	15.9523	15.8324	14.1302	14.242	14.5182	2			0.999999	8.43e-05	115.8	87.596	115.8	-0.17426	78404000	13	316931	529.59	15106	0	0	12777	0	0
	0.0488866	0.0122217	+	1.48708	0.45051	+	1.51666	0.438288	Q2M3G4	166	Q2M3G4	Q2M3G4	Protein Shroom1	SHROOM1	S				yes		RVLRETSFQRKELRMSLPARLRPTVPARPPA	14.6274	14.4222	14.4255	14.7932	15.1858	14.8476	14.4277	14.6043	14.4798	3			1	0.000994041	127.87	94.001	127.87	0.0083312	76778000	166	238957	833.75	20922	0	0	16729	0	0
	1.75373	-0.321992	+	1.89097	0.355757	+	3.18046	0.677749	Q2M3G4	190	Q2M3G4	Q2M3G4	Protein Shroom1	SHROOM1	S						VPARPPATHPRSASLSHPGGEGEPARSRAPA	13.0854	13.313	13.1761	13.4657	13.5368	13.6391	12.7803	12.9517	12.8765	2			0.954779	1.17e-06	161.04	133.08	161.04	-0.38987	46901000	190	87477.8	0	7329.8	0	0	7918.8	0	0
	0.505342	-0.116705	+	2.27921	0.453679	+	2.32258	0.570384	Q32P44	176	Q32P44	Q32P44	Echinoderm microtubule-associated protein-like 3	EML3	S				yes		SPSERPRQKLSRKAISSANLLVRSGSTESRG	18.9344	18.8156	19.0174	19.4377	19.4298	19.2609	18.6572	18.9415	18.8187	2			0.963837	1.79e-05	174.05	92.264	128.96	-0.45711	820850000	176	5044630	9608.2	391530	0	0	323650	0	0
	0.266512	0.163184	+	1.90293	1.01381	+	3.25537	0.850626	Q4ADV7	1017	Q4ADV7	Q4ADV7	RAB6A-GEF complex partner protein 1	RIC1	S						PSSSGGFEFFRNRSISLSQSAENVPASKFSL	15.8181	15.3178	16.1138	16.8306	16.7511	16.7093	16.0669	15.8301	15.8423	2			0.937858	1.01e-06	163.41	137.3	163.41	-1.2128	55684000	1017	717564	722.47	47021	0	0	30604	0	0
	0.54595	-0.152021	+	1.49474	-0.396016	+	2.43402	-0.243996	Q9UKM9	288	Q9UKM9	Q9UKM9	RNA-binding protein Raly	RALY	S						ARTRDDGDEEGLLTHSEEELEHSQDTDADDG	19.6045	19.867	19.4583	19.2043	19.2395	19.2979	19.4465	19.5465	19.4807	4			0.989845	1.44e-118	385.2	369.74	331.58	0.06636	4628800000	288	6563470	29032	617580	0	0	657630	0	0
	1.99507	0.121398	+	2.19805	-0.216903	+	3.03524	-0.338301	Q04726	289	Q04726	Q04726	Transducin-like enhancer protein 3	TLE3	S						DKARSLKKDAPTSPASVASSSSTPSSKTKDL	14.8663	14.9257	14.8565	14.6148	14.7337	14.6493	14.9806	14.9993	15.0328	2			0.823036	0.0349805	63.691	48.489	63.691	-0.61728	74304000	289	269743	596.15	0	24613	0	0	23493	0
	1.19814	-0.145775	+	2.69448	-0.784784	+	2.49297	-0.639009	Q13085	29	Q13085	Q13085	Acetyl-CoA carboxylase 1;Biotin carboxylase	ACACA	S						NQHSRFIIGSVSEDNSEDEISNLVKLDLLEE	18.1792	18.1094	18.2827	17.524	17.4806	17.2124	17.9908	18.0663	18.0769	3			0.999969	3.34e-52	299.51	259.13	299.51	0.21382	324760000	29	2218110	1755.5	234270	0	0	201030	0	0
	0.4603	-0.0963351	+	1.57562	-0.396117	+	1.57121	-0.299782	Q86X27	290	Q86X27	Q86X27	Ras-specific guanine nucleotide-releasing factor RalGPS2	RALGPS2	T						DDNYKLSLKIEPGTSTPRSAASREDLVGPEV	17.6324	17.8716	17.6133	17.4632	17.273	17.1926	17.553	17.6748	17.6004	2			0.956247	0.0433461	91.095	35.634	91.095	0.24495	56461000	290	1726920	0	161500	0	0	171260	0	0
	0.588416	-0.0892124	+	2.19373	-0.362181	+	1.8027	-0.272968	Q8TF01	290	Q8TF01	Q8TF01	Arginine/serine-rich protein PNISR	PNISR	S						EGGDGPRLPQRSKFDSDEEEEDTENVEAASS	18.7887	18.8781	18.7086	18.3338	18.4956	18.4594	18.6091	18.7513	18.7473	3			0.998554	1.68e-97	371.25	341.33	371.25	0.57099	377920000	290	3712870	594.59	354580	0	0	337590	0	0
	0.0189667	-0.00241661	+	3.34495	-0.306558	+	2.90382	-0.304141	Q9H3Q1	292	Q9H3Q1	Q9H3Q1	Cdc42 effector protein 4	CDC42EP4	S				yes		PSHALEDEGWAAAAPSPGSARSMGSHTTRDS	20.2581	20.343	20.3126	19.9729	20.0245	19.9967	20.3706	20.2732	20.2627	3			1	2.15e-117	372.6	358.87	129.93	-0.017118	4406200000	292	11014200	2244.4	919290	43974	0	862480	44078	0
	0.551881	-0.215273	+	2.06161	-0.815466	+	1.64266	-0.600193	P08559;P29803	293;291	P08559	P08559	Pyruvate dehydrogenase E1 component subunit alpha, somatic form, mitochondrial;Pyruvate dehydrogenase E1 component subunit alpha, testis-specific form, mitochondrial	PDHA1;PDHA2	S				yes		GPILMELQTYRYHGHSMSDPGVSYRTREEIQ	23.5642	23.4181	23.1401	22.6944	22.3279	22.6536	23.3769	22.9638	23.1358	3			0.99986	1.54e-29	278.72	240.53	106.58	0.42307	10583000000	293	78970100	51415	6645100	2481200	0	5089200	2120700	0
	0.411269	0.0712976	+	1.59514	-0.315569	+	1.77683	-0.386866	P78312	293	P78312	P78312	Protein FAM193A	FAM193A	S						PRLILTDSGSAPTFCSDDEDVAPLSAKFADI	15.167	15.0631	15.2168	14.97	14.6976	14.8326	15.1655	15.3364	15.1589	3			0.963008	0.000964697	77.045	64.116	77.045	-1.7609	29508000	293	315070	1464	30196	0	0	25774	0	0
+	1.33916	1.33879	+	1.88383	2.5093	+	1.37302	1.17051	Q4KMP7	687	Q4KMP7	Q4KMP7	TBC1 domain family member 10B	TBC1D10B	S						AAGGAPSPPPPVRRASAGPAPGPVVTAEGLH	11.7398	12.5323	13.3032	15.4843	14.2816	15.3373	14.0511	13.9069	13.6337	3			0.984434	0.00016829	79.042	63.523	79.042	1.504	52180000	687	185105	1093.8	2935.3	0	0	4677.7	0	0
	0.243389	-0.0833581	+	1.20691	-0.357967	+	1.99775	-0.274609	P23508	294	P23508	P23508	Colorectal mutant cancer protein	MCC	S						ELQTRLQSVQATGPSSPGRLTSTNRPINPST	17.0833	16.9996	16.6563	16.4815	16.6467	16.5372	16.8945	16.7752	16.8195	2			0.999909	1.99e-19	247.44	212.68	247.44	0.45085	119020000	294	1009230	0	111180	0	0	95125	0	0
	0.200867	-0.045777	+	1.81575	-0.563203	+	1.46618	-0.517426	O75592	2947	O75592	O75592	E3 ubiquitin-protein ligase MYCBP2	MYCBP2	S						SIGKAPLKDEQEMRASPKISRKCANRHTRPK	19.7215	19.6976	19.7087	19.3082	19.2592	18.8708	19.5134	19.8166	19.6605	4			1	0.00010569	120.92	93.585	54.253	-0.29744	304520000	2947	6840370	31481	668730	0	0	586620	0	0
	1.00704	-0.284038	+	1.50799	0.273802	+	1.81451	0.55784	Q4V328	655	Q4V328	Q4V328	GRIP1-associated protein 1	GRIPAP1	S						KSRSGLEELVLSEMNSPSRTQTGDSSSISSF	14.8746	14.8103	14.6923	14.9801	15.0254	15.1931	14.7014	14.2852	14.5385	2			0.999867	2.9e-10	189.81	168.75	189.81	-0.64254	41057000	655	261961	0	24751	0	0	21734	0	0
	0.730267	-0.215326	+	3.28541	1.08292	+	3.68926	1.29825	Q53SF7	1146	Q53SF7	Q53SF7	Cordon-bleu protein-like 1	COBLL1	S						PTPTDGPSFTVMRQSSLTFQSSDPEQMRQSL	16.9704	16.9161	16.6512	17.8573	17.9916	17.9375	16.7205	16.446	16.7251	2			0.969217	9.11e-49	322.93	299.84	322.93	0.47944	294750000	1146	1460310	0	102960	0	0	89913	0	0
	0.632026	-0.0951811	+	3.11975	-0.471282	+	2.93231	-0.376101	O94875	298	O94875	O94875	Sorbin and SH3 domain-containing protein 2	SORBS2	S						DLPGSSTTLTKSFTSSSPSSPSRAKGGDDSK	18.551	18.3771	18.4443	17.9753	17.9936	17.9896	18.4431	18.2869	18.3569	2			0.88333	3.36e-07	179.08	159.4	179.08	-0.43096	136200000	298	2876150	0	0	301670	0	0	240800	0
	0.365535	0.151885	+	0.982966	-0.501046	+	1.6332	-0.652931	Q53SF7	298	Q53SF7	Q53SF7	Cordon-bleu protein-like 1	COBLL1	T						QRSKKKRDQTASAPATPLVNKHRPTFTRSNT	19.8439	19.3181	19.7681	19.3564	19.2722	18.7984	19.9073	19.7257	19.7528	2			1	4.91e-06	168.42	133.61	146.81	-0.37621	411710000	298	7046250	10522	184930	541850	0	113130	341050	0
	0.262825	-0.0646432	+	2.03629	-0.370416	+	1.60954	-0.305773	Q14676	299	Q14676	Q14676	Mediator of DNA damage checkpoint protein 1	MDC1	S			yes			PAGVILERSQPPGEDSDTDVDDDSRPPGRPA	16.8835	17.1025	16.9609	16.5724	16.5609	16.7023	16.8207	17.0636	16.8688	4			0.999998	1.03e-35	223.56	209.77	223.56	0.4851	375890000	299	1064910	0	38702	58343	0	44547	57410	0
	1.73102	-0.372887	+	1.32485	0.495443	+	2.30685	0.868331	Q5HYK7	275	Q5HYK7	Q5HYK7	SH3 domain-containing protein 19	SH3D19	S						RIPAKPGKCLHEDPQSPPPLPAEKPIGNTFS	18.1733	17.9376	17.8785	18.256	18.4491	18.7706	17.5549	17.6809	17.635	4			1	2.12e-08	127.77	115.53	127.77	0.99819	216760000	275	2580650	0	233330	0	0	179050	0	0
	0.830154	0.212449	+	1.96143	0.578513	+	1.72846	0.366064	Q5JSH3	199	Q5JSH3	Q5JSH3	WD repeat-containing protein 44	WDR44	S						KGGGDVLEPVSSDSLSTKDFAAVEEVAPAKP	15.5442	15.3518	15.7111	15.9613	16.1939	16.1875	15.8305	15.7766	15.6375	4			0.958358	3e-15	154.68	148.58	154.68	0.69101	101580000	199	539845	1392.6	39031	0	0	31313	0	0
	0.0817302	0.0226231	+	2.40055	0.920737	+	2.6356	0.898114	Q5JSZ5	1132	Q5JSZ5	Q5JSZ5	Protein PRRC2B	PRRC2B	S				yes		RPEDCPRAKPRRRVASETHSEGSEYEELPKR	15.2883	14.999	15.0371	15.9377	15.8729	16.276	15.1849	15.146	15.0614	3			0.97291	2.71e-22	240.42	199.58	240.42	1.1489	47771000	1132	432985	1090.3	32796	0	0	24683	0	0
	0.0682016	0.0200036	+	2.07733	-0.700122	+	2.61973	-0.720126	Q96N67	30	Q96N67	Q96N67	Dedicator of cytokinesis protein 7	DOCK7	S						VAAEVRKQISGQYSGSPQLLKNLNIVGNISH	19.5013	19.1763	19.2293	18.6186	18.773	18.4149	19.2959	19.312	19.359	3			0.94169	2.44e-10	193.63	153.78	193.63	0.48319	291930000	30	5119080	18858	575730	0	0	412770	0	0
	0.082836	-0.0282275	+	2.44874	0.79616	+	4.13018	0.824387	Q5JSZ5	416	Q5JSZ5	Q5JSZ5	Protein PRRC2B	PRRC2B	S						RPKWNSWDPRRQRQLSMSSADSADAKRTREE	18.2021	17.8278	17.8568	18.6644	18.7853	18.8253	17.9321	17.9197	17.9502	4			0.999613	3.44e-05	142.3	123.46	116.21	0.69587	390330000	416	2964750	8603.7	237940	0	0	166260	0	0
	0.497683	0.140463	+	1.13447	-0.400609	+	2.04833	-0.541072	Q9UKY7	30	Q9UKY7	Q9UKY7	Protein CDV3 homolog	CDV3	S						KRDKKKKKERSNRAASAAGAAGSAGGSSGAA	14.0834	13.8981	13.6616	13.6944	13.3127	13.4342	14.0478	14.0261	13.9905	3			0.788488	0.00176229	45.548	39.829	45.548	-0.2315	113540000	30	129998	0	14451	0	0	11749	0	0
	1.1548	-0.378723	+	2.90058	-1.11929	+	2.8556	-0.740571	P08559;P29803	300;298	P08559	P08559	Pyruvate dehydrogenase E1 component subunit alpha, somatic form, mitochondrial;Pyruvate dehydrogenase E1 component subunit alpha, testis-specific form, mitochondrial	PDHA1;PDHA2	S				yes		QTYRYHGHSMSDPGVSYRTREEIQEVRSKSD	21.6899	21.6401	21.276	20.5026	20.3508	20.3947	21.2868	21.0043	21.1787	3			0.999973	5.06e-07	173.21	147.21	173.21	-0.25231	4015300000	300	19890500	52529.3	69512	2481200	0	53117	2120700	0
	0.139805	-0.0843824	+	2.91607	1.60936	+	3.97602	1.69374	Q5M775	131	Q5M775	Q5M775	Cytospin-B	SPECC1	S						SRERSVPRGPSNPRKSVSSPTSSNTPTPTKH	18.5114	18.2196	17.8367	19.8015	19.8354	19.7588	18.1802	18.2429	17.8914	3			0.999004	3.15e-18	225.7	184.3	185.54	0.48073	513180000	131	4749220	7696.1	293650	0	0	216550	0	0
	1.25084	0.0744298	+	1.86617	0.500798	+	1.6217	0.426368	Q5PRF9	271	Q5PRF9	Q5PRF9	Protein Smaug homolog 2	SAMD4B	S						LGARAAFTTPDHAPLSPQSSVASSGSEQTEE	16.3191	16.2739	16.3219	16.7796	16.6157	17.0219	16.3724	16.3431	16.4226	3			0.998516	1.57e-26	192.02	183.62	192.02	0.54071	302630000	271	870967	1035.3	66111	0	0	58311	0	0
	0.580964	-0.101184	+	2.68487	0.641309	+	3.14757	0.742493	Q5PRF9	592	Q5PRF9	Q5PRF9	Protein Smaug homolog 2	SAMD4B	S						PMPPRALPPGRMGLLSPSGIGGVSPRHALTS	14.1947	13.9825	14.0448	14.7099	14.6063	14.8298	13.8864	14.0404	13.9917	2			0.883831	0.000855602	98.439	70.776	98.439	-0.46387	18770000	592	185162	0	15588	0	0	12437	0	0
	0.283794	0.0270926	+	2.49838	-0.492959	+	2.63452	-0.520051	Q765P7	300	Q765P7	Q765P7	MTSS1-like protein	MTSS1L	S						AKGGGAPWPGGAQTYSPSSTCRYRSLAQPAT	16.7939	16.7056	16.7003	16.2125	16.3759	16.1326	16.7679	16.7971	16.7162	2			0.975402	1.06e-17	202.35	185.92	202.35	0.12726	169390000	300	895521	2062.3	91311	0	0	78015	0	0
	0.527802	-0.17787	+	2.35591	0.944455	+	2.35811	1.12232	Q5QP82	349	Q5QP82	Q5QP82	DDB1- and CUL4-associated factor 10	DCAF10	S						LEVGSYPILRARRTTSSSDLTTSSSSSGPRV	14.5995	14.3408	14.4724	15.4321	15.1565	15.6574	14.3537	14.047	14.4782	2			0.978959	2.55e-09	131.24	111.63	131.24	-0.22319	0	349	270629	0	20528	0	0	15836	0	0
	0.699346	-0.113826	+	2.4473	-0.457122	+	1.62712	-0.343296	Q8NFC6	3019	Q8NFC6	Q8NFC6	Biorientation of chromosomes in cell division protein 1-like 1	BOD1L1	S				yes		RSTTRSEAQRSKTQLSPSIKRKREVSPPGAR	17.8346	17.814	17.7373	17.2197	17.3383	17.4565	17.8161	17.5971	17.6312	2			0.811211	0.0164054	87.667	53.801	87.667	-0.02711	31763000	3019	1815510	0	185310	0	0	164720	0	0
	0.332009	-0.0285619	+	2.30286	-0.251511	+	2.33187	-0.222949	Q9BRQ0	302	Q9BRQ0	Q9BRQ0	Pygopus homolog 2	PYGO2	T				yes		NQPSFPPNSSGRGGGTPDANSLAPPGKAGGG	20.1797	20.1922	20.098	19.9685	19.8938	19.8531	20.1673	20.1083	20.1087	2			0.99999	1.01e-13	201.4	170.85	201.4	-0.36237	2883100000	302	9990240	22572	913260	0	0	818910	0	0
	0.142255	-0.0169678	+	2.88733	-0.756578	+	2.89207	-0.739611	Q9UJ41	302	Q9UJ41	Q9UJ41	Rab5 GDP/GTP exchange factor	RABGEF1	S						SRVGSKKEIQEAKAPSPSINRQTSIETDRVS	17.4943	17.4257	17.3748	16.8488	16.6051	16.5711	17.4604	17.3653	17.4182	2			0.989019	0.00114012	154.05	85.684	154.05	0.26363	125860000	302	1362410	0	147020	0	0	126780	0	0
	0.211401	-0.0294431	+	1.93183	-0.24075	+	3.15087	-0.211307	O00499	303	O00499	O00499	Myc box-dependent-interacting protein 1	BIN1	S						NAPAKGNKSPSPPDGSPAATPEIRVNHEPEP	19.6222	19.515	19.4432	19.2555	19.2883	19.3144	19.4858	19.5263	19.4801	2			0.999994	2.07e-35	277.34	219.01	266.45	0.78384	1029000000	303	6470420	9811.3	248390	376700	0	232650	286040	0
	0.225535	-0.0316753	+	2.46807	-0.322121	+	3.47058	-0.290446	P49023	303	P49023	P49023	Paxillin	PXN	S						ERCWAAGWPRDGGRSSPGGQDEGGFMAQGKT	20.9216	21.0087	20.8347	20.5853	20.6247	20.5887	20.8628	20.9339	20.8733	3			0.88042	4.19e-25	242.83	212.24	229.98	-0.19277	1805000000	303	16703000	35475	1512700	0	0	1420100	0	0
	0.459503	-0.0619863	+	1.93925	-0.768716	+	1.87702	-0.70673	Q00613	303	Q00613	Q00613	Heat shock factor protein 1	HSF1	S						PLSSSPLVRVKEEPPSPPQSPRVEEASPGRP	20.4078	20.5925	20.4749	19.829	19.9412	19.3988	20.3988	20.4719	20.4185	3			1	0.00100725	95.409	76.147	51.348	1.5867	464320000	303	11212200	11222.4	903200	163320	0	875950	196680	0
	0.719289	-0.252438	+	1.4434	-0.515394	+	2.1173	-0.262955	Q13247	303	Q13247	Q13247	Serine/arginine-rich splicing factor 6	SRSF6	S						DIKSKSRSRSQSRSNSPLPVPPSKARSVSPP	21.8027	22.1739	21.6363	21.3194	21.4504	21.2969	21.5859	21.6617	21.608	2			0.986738	0.006366	87.083	67.989	87.083	-0.16269	2115400000	303	29023000	846.28	2754100	0	0	3115600	0	0
	2.2711	-0.183737	+	5.04323	0.925029	+	7.07773	1.10877	Q5SW79;Q00G26	1160;203	Q5SW79	Q5SW79	Centrosomal protein of 170 kDa;Perilipin-5	CEP170;PLIN5	S						SRIDLLAQPRRTRLGSLSARSDSEATISRSS	18.2161	18.1058	18.1634	19.0995	19.0792	19.0817	17.989	17.9875	17.9576	2			0.999603	0.0013643	132.84	27.592	125.53	0.10744	409620000	1160	3449140	914.81	240220	0	0	200550	0	0
	0.779048	-0.33484	+	3.38695	2.22191	+	4.7567	2.55675	Q5SW79	1270	Q5SW79	Q5SW79	Centrosomal protein of 170 kDa	CEP170	S			yes			TRLRTSPALKTTRLQSAGSAMPTSSSFKHRI	16.3695	15.8361	16.4216	18.3378	18.3576	18.5976	15.7896	15.8306	16.0026	2			0.997369	2.28e-18	231.77	176.51	231.77	-0.27878	135300000	1270	1589390	0	68417	0	0	43407	0	0
	0.0864741	-0.0137246	+	3.01255	-0.493021	+	2.67159	-0.479296	Q6ICG6	304	Q6ICG6	Q6ICG6	Uncharacterized protein KIAA0930	KIAA0930	S						STPPTPERNNRPAFFSPSLKRKVPRNRIAEM	19.9633	19.9785	19.8823	19.3978	19.545	19.4023	19.8357	19.9514	19.9959	4			0.995895	1.86e-06	169.37	132.21	169.37	-0.39878	245210000	304	8204240	23430	788300	0	0	708970	0	0
	0.229985	-0.0493406	+	1.94898	-0.389592	+	2.69262	-0.340252	Q9H4L5	304	Q9H4L5	Q9H4L5	Oxysterol-binding protein-related protein 3	OSBPL3	S						LQVPKPFSGPVRLHSSNPNLSTLDFGEEKNY	19.3746	19.111	19.3061	18.9474	18.8208	18.8548	19.1934	19.1785	19.2718	3			0.889813	5.88e-60	273.94	252.48	169.84	1.1923	436980000	304	5200630	7666.2	528180	0	0	395010	0	0
+	2.16138	-0.670818	+	3.11901	1.19185	+	4.81235	1.86267	Q5SW79	174	Q5SW79	Q5SW79	Centrosomal protein of 170 kDa	CEP170	T			yes			KSEEKAMDISAMPRGTPLYGQPSWWGDDEVD	15.14	14.8832	14.7332	16.1649	16.1565	16.0105	14.2998	14.1371	14.3071	3			0.99368	2.91e-05	103.92	93.113	103.92	0.68596	48749000	174	374548	0	29648	0	0	22830	0	0
	0.535513	0.0297807	+	2.21904	-0.25173	+	2.26192	-0.28151	P41182	307	P41182	P41182	B-cell lymphoma 6 protein	BCL6	S						PYFPCDKASKEEERPSSEDEIALHFEPPNAP	15.0486	15.0346	15.0681	14.8267	14.8613	14.7081	15.0922	15.1119	15.0366	4			0.867827	0.0210415	56.383	44.149	56.383	0.81987	33623000	307	294154	1507.4	0	27862	0	0	25283	0
	0.180887	-0.0390237	+	1.54441	-0.275726	+	3.91237	-0.236702	Q13435	307	Q13435	Q13435	Splicing factor 3B subunit 2	SF3B2	S						EEEEMETDARSSLGQSASETEEDTVSVSKKE	19.1722	19.2513	18.9774	18.8574	18.8374	18.8789	19.1006	19.074	19.1093	3			0.999362	2.2e-06	122.84	105.48	122.84	1.0485	392630000	307	4860300	3972.8	0	460260	0	0	434200	0
	0.535513	0.0297807	+	2.21904	-0.25173	+	2.26192	-0.28151	P41182	308	P41182	P41182	B-cell lymphoma 6 protein	BCL6	S						YFPCDKASKEEERPSSEDEIALHFEPPNAPL	15.0486	15.0346	15.0681	14.8267	14.8613	14.7081	15.0922	15.1119	15.0366	4			0.96528	0.0210415	56.383	44.149	56.383	0.81987	33623000	308	294154	1507.4	0	27862	0	0	25283	0
	1.55686	-0.288251	+	1.89646	-0.67024	+	1.28276	-0.381989	Q86X27	308	Q86X27	Q86X27	Ras-specific guanine nucleotide-releasing factor RalGPS2	RALGPS2	S				yes		SAASREDLVGPEVGASPQSGRKSVAAEGALL	18.7742	18.742	18.5263	17.9609	18.2657	17.8052	18.3286	18.4009	18.4482	3			0.999894	8.14e-17	181.95	152.5	181.95	0.15755	590880000	308	3051650	2173.4	351110	0	0	307980	0	0
	0.157266	-0.0403086	+	1.4028	-0.284784	+	3.54464	-0.244475	Q13435	309	Q13435	Q13435	Splicing factor 3B subunit 2	SF3B2	S						EEMETDARSSLGQSASETEEDTVSVSKKEKN	19.5968	19.7125	19.3904	19.2863	19.2648	19.2942	19.5516	19.4901	19.537	3			0.998676	3.24e-10	165.47	150.86	99.387	-0.38719	725110000	309	6546430	5433.4	154110	460260	0	158350	434200	0
+	2.06956	1.33276	+	2.80882	1.95775	+	2.35513	0.624997	Q5SW79	446	Q5SW79	Q5SW79	Centrosomal protein of 170 kDa	CEP170	S			yes	yes		RGGHGVPHGKLLKQKSEEPSVSIPFLQTALL	16.7884	17.3497	16.4787	18.8545	18.8098	18.8257	18.1133	18.4185	18.0833	3			0.999879	8.46e-13	181.43	161.06	181.43	-0.37031	521550000	446	2866330	754.49	90967	0	0	120440	0	0
	1.61355	-0.0936343	+	2.72836	-0.342427	+	2.41664	-0.248793	P49454	3094	P49454	P49454	Centromere protein F	CENPF	S						EVVKKGFADIPTGKTSPYILRRTTMATRTSP	17.1194	17.2038	17.1686	16.7974	16.8996	16.7675	17.0826	17.0785	17.0497	2			0.989272	0.000661198	153.73	81.246	153.73	1.2333	66589000	3094	1203930	706.64	113940	0	0	109160	0	0
+	2.72166	0.925336	+	3.73215	1.25508	+	1.41296	0.329749	Q5SW79	881	Q5SW79	Q5SW79	Centrosomal protein of 170 kDa	CEP170	S			yes			SLALTSASRIRERSESLDPDSSMDTTLILKD	16.6808	16.9627	16.8352	18.1044	18.1499	17.9896	17.7404	17.9261	17.5883	2			0.947981	1.07e-10	191.78	168.54	191.78	-0.87488	370150000	881	1947460	2395.1	84549	0	0	92782	0	0
	0.441514	-0.121809	+	1.57698	0.381257	+	1.8937	0.503066	Q5T4S7	181	Q5T4S7	Q5T4S7	E3 ubiquitin-protein ligase UBR4	UBR4	S						TLSDVEDQKELASPVSPELRQKEVQMNFLNQ	16.3434	16.3937	16.6026	16.7451	16.9831	16.7552	16.1709	16.3279	16.4753	3			0.969566	4.32e-06	113.6	95.69	113.6	-1.4833	131830000	181	884354	1731.1	67211	0	0	63217	0	0
	0.970794	-0.245517	+	3.78758	1.36055	+	4.29172	1.60607	Q5T5U3	1712	Q5T5U3	Q5T5U3	Rho GTPase-activating protein 21	ARHGAP21	S						IECDTLSRKKSARFKSDSGSLGDAKNEKEAP	18.4615	18.1498	18.2889	19.712	19.5793	19.6907	18.0583	17.9196	18.1858	3			0.989315	6e-05	110.6	85.284	110.6	-0.53848	223120000	1712	4501090	0	283850	0	0	206590	0	0
	2.10586	0.0540237	+	2.15836	-0.292511	+	2.43634	-0.346535	Q5T1M5	311	Q5T1M5	Q5T1M5	FK506-binding protein 15	FKBP15	S			yes			GSDGHSVSSRDSAAPSPIPGADNLSADPVVS	17.0867	17.0549	17.07	16.6651	16.8391	16.8299	17.1127	17.1319	17.1291	3			0.965684	1.58e-05	94.642	78.242	94.642	-0.19044	125290000	311	1192210	3224.7	111430	0	0	98738	0	0
	0.391932	-0.167961	+	1.21504	-0.494281	+	1.72982	-0.32632	Q8NEY1	311	Q8NEY1	Q8NEY1	Neuron navigator 1	NAV1	S						SDDANPRSVSSLSNRSSPLSWRYGQSSPRLQ	16.0575	16.6605	16.2805	15.8394	15.9671	15.7091	16.2179	16.1934	16.0833	2			0.994912	4.13e-05	199.75	138.66	199.75	-0.23279	61838000	311	642268	0	55334	0	0	75677	0	0
	0.296081	-0.0269616	+	2.87265	-0.240983	+	2.34342	-0.214022	Q9H8G2	312	Q9H8G2	Q9H8G2	Caspase activity and apoptosis inhibitor 1	CAAP1	S						DIEKSVNEILGLAESSPNEPKAATLAVPPPE	19.303	19.326	19.2544	19.0103	19.0728	19.0773	19.2085	19.3088	19.2852	2			0.846412	3.93e-22	240.13	208.06	141.55	-0.069588	457420000	312	5507930	6053.9	503090	0	0	456600	0	0
	0.0498717	-0.00708262	+	2.02318	-0.301183	+	2.54873	-0.2941	Q9Y2D8	312	Q9Y2D8	Q9Y2D8	Afadin- and alpha-actinin-binding protein	SSX2IP	S						KKPRERVDDSTGTVISDVEEDAGELSRESMW	18.3273	18.2892	18.1698	17.8817	18.0319	17.9691	18.2719	18.2593	18.2339	2			0.999998	4.83e-38	269.59	219.09	235.26	0.57771	601860000	312	2666380	3476.4	259100	0	0	226940	0	0
	0.565226	-0.117249	+	4.59983	-1.59322	+	4.30247	-1.47597	Q9Y446	313	Q9Y446	Q9Y446	Plakophilin-3	PKP3	S						HGFNSYGSHRTLQRLSSGFDDIDLPSAVKYL	20.8265	20.8471	20.6554	19.1046	19.2236	19.2211	20.6531	20.782	20.5422	3			0.82449	1.2e-42	283.37	248.04	283.37	-0.32923	838280000	313	11899500	16917	1417900	0	0	1273500	0	0
	0.266496	0.0691738	+	2.14351	-0.550533	+	4.30949	-0.619707	Q969H4	314	Q969H4	Q969H4	Connector enhancer of kinase suppressor of ras 1	CNKSR1	S				yes		DSPHQRSPSLSLAPLSPRAPSEDVFAFDLSS	16.9811	16.715	16.6392	16.2868	16.2247	16.1723	16.855	16.8442	16.8437	2			1	0.000152838	134.13	113.8	134.13	-0.16658	198900000	314	923867	1202	103710	0	0	78510	0	0
+	1.9656	0.907509	+	4.22754	1.44243	+	1.30048	0.534917	Q5T5U3	611	Q5T5U3	Q5T5U3	Rho GTPase-activating protein 21	ARHGAP21	S						RNFQTTCGMSLPRGISQDRSPLVKVRSNSLK	15.8861	16.1049	15.8972	17.3358	17.4079	17.4718	16.6624	17.247	16.7014	3			0.999996	2.28e-06	157.68	135.08	157.68	0.42236	67442000	611	1143980	4014.6	49247	0	0	52032	0	0
	0.0481085	-0.0147915	+	3.67633	1.27028	+	4.05884	1.28507	Q5T5U3	880	Q5T5U3	Q5T5U3	Rho GTPase-activating protein 21	ARHGAP21	S				yes		PSLDAQPNSKTERSKSYDEGLDDYREDAKLS	19.3037	19.1097	19.0145	20.3355	20.5069	20.3963	19.0375	19.247	19.099	4			0.98835	2.63e-06	150.94	124.53	150.94	-0.067219	464550000	880	8045350	0	503330	0	0	394640	0	0
	0.425602	-0.0566807	+	2.40892	-0.335884	+	2.51122	-0.279203	O00273	315	O00273	O00273	DNA fragmentation factor subunit alpha	DFFA	S				yes		TQSLHSLRSISASKASPPGDLQNPKRARQDP	19.5187	19.5951	19.4315	19.1289	19.1756	19.2332	19.4017	19.4626	19.511	3			0.994174	1.06e-06	150.83	123.22	150.83	-0.63354	2031400000	315	6244140	20122	582580	0	0	547460	0	0
	0.0173646	-0.00165812	+	2.62882	-0.25363	+	3.42639	-0.251972	Q99708	315	Q99708	Q99708	DNA endonuclease RBBP8	RBBP8	T						RNTEDSLRFSDSTSKTPPQEELPTRVSSPVF	16.8783	16.9596	16.9771	16.7016	16.7093	16.6432	16.9384	16.9511	16.9205	3			0.893917	0.000502299	93.006	82.201	93.006	1.3928	56000000	315	1078180	2086.7	96703	0	0	92583	0	0
+	2.52817	-0.44979	+	3.94461	0.904586	+	5.06464	1.35438	Q5T5U3	923	Q5T5U3	Q5T5U3	Rho GTPase-activating protein 21	ARHGAP21	S				yes		ADSQKSSEDSGSRKDSSSEVFSDAAKEGWLH	19.105	18.9174	18.9692	19.8651	19.8991	19.9412	18.49	18.5242	18.6281	3			0.969845	3.82e-05	146.78	111.12	146.78	-0.0066224	514430000	923	5875010	6073.9	439700	0	0	346650	0	0
	1.24052	0.124687	+	3.21988	0.699263	+	2.96138	0.574577	Q5T6F0	15	Q5T6F0	Q5T6F0	DDB1- and CUL4-associated factor 12	DCAF12	S						_MARKVVSRKRKAPASPGAGSDAQGPQFGWD	16.9402	17.0349	17.059	17.7491	17.5907	17.7921	17.1384	17.0826	17.1871	4			0.999936	5.83e-34	226.28	203.83	226.28	1.275	127360000	15	1531540	7655.2	100860	0	0	97408	0	0
	0.546345	-0.106761	+	1.8244	-0.335665	+	2.18471	-0.228903	Q7L4I2	32	Q7L4I2	Q7L4I2	Arginine/serine-rich coiled-coil protein 2	RSRC2	S				yes		SPDRDKKKEQSEVSVSPRASKHHYSRSRSRS	20.9562	21.1673	20.9143	20.7235	20.6397	20.6676	20.8866	20.9765	20.8544	2			0.999999	5.27e-09	180.84	69.233	180.84	0.036452	2864100000	32	17352600	11799.8	1385000	163640	0	1420600	159840	0
	0.342336	-0.0296981	+	2.31506	-0.239157	+	2.94493	-0.209459	Q96C90	32	Q96C90	Q96C90	Protein phosphatase 1 regulatory subunit 14B	PPP1R14B	S			yes			PGPGSGGPGPRVYFQSPPGAAGEGPGGADDE	16.6799	16.7876	16.7819	16.4635	16.5279	16.5405	16.7312	16.7245	16.7046	3			1	9.31e-12	138.15	112.94	138.15	0.45207	79247000	32	941847	699.33	84496	0	0	82450	0	0
	1.19893	0.0560277	+	2.91486	-0.375769	+	3.13612	-0.431797	Q9H0W8	32	Q9H0W8	Q9H0W8	Protein SMG9	SMG9	S						RRRWKEPGSGGPQNLSGPGGRERDYIAPWER	17.8209	17.7738	17.7776	17.4837	17.4265	17.3347	17.8186	17.8479	17.8738	3			1	2.91e-24	237.22	212.35	237.22	-0.086901	417170000	32	1922340	555.43	183600	0	0	160320	0	0
+	2.30257	0.865575	+	3.82373	1.92651	+	3.3428	1.06094	Q5T8I3	288	Q5T8I3	Q5T8I3	Protein FAM102B	FAM102B	S						DTASEKLSRCPVKQDSVESQLKRVDDTRVDA	15.5187	15.3509	15.08	17.1859	17.1996	17.3437	16.0242	16.1986	16.3236	4			0.99737	0.00138854	88.264	68.11	88.264	-0.14845	55642000	288	865376	0	38358	0	0	31294	0	0
	0.567592	0.0753517	+	2.42825	-0.241767	+	2.61306	-0.317118	P62136	320	P62136	P62136	Serine/threonine-protein phosphatase PP1-alpha catalytic subunit	PPP1CA	T				yes		KYGQFSGLNPGGRPITPPRNSAKAKK_____	18.6543	18.6075	18.5241	18.3477	18.3366	18.3763	18.7608	18.6254	18.6257	3			0.999958	0.00011828	86.953	67.743	64.954	0.16575	336770000	320	3491420	9640.8	323600	0	0	281280	0	0
	0.291021	0.107579	+	3.36512	1.56288	+	4.88297	1.4553	Q5TCZ1	1038	Q5TCZ1	Q5TCZ1	SH3 and PX domain-containing protein 2A	SH3PXD2A	S				yes		SAAAEAKGRLAERAASQGSDSPLLPAQRNSI	15.4211	15.0795	14.9423	16.768	16.656	16.7077	15.3116	15.1646	15.2896	2			0.999858	2.23e-18	232.15	199.58	232.15	-0.79983	94273000	1038	576867	2007.1	35894	0	0	26061	0	0
	0.504739	-0.0416323	+	3.17823	-0.24919	+	2.80564	-0.207558	Q9Y5U2	321	Q9Y5U2	Q9Y5U2	Protein TSSC4	TSSC4	S						GSRKRSRDHFRNKSSSPEDPGAEV_______	16.0302	16.0322	15.9564	15.7472	15.7716	15.7524	16.0145	15.9531	15.9263	2			0.806871	2.56e-06	164.33	161.92	164.33	-0.53095	20320000	321	557703	0	54316	0	0	49544	0	0
	0.0697758	-0.00880178	+	2.0169	0.205549	+	3.36284	0.214351	Q5TCZ1	547	Q5TCZ1	Q5TCZ1	SH3 and PX domain-containing protein 2A	SH3PXD2A	S				yes		KEAEEGPTGASESQDSPRKLKYEEPEYDIPA	16.3281	16.2167	16.3524	16.5214	16.516	16.4763	16.3044	16.262	16.3043	2			1	3.69e-36	287.38	236.48	287.38	-0.34976	311990000	547	774029	0	66514	0	0	56103	0	0
	1.44374	-0.779208	+	2.75986	2.51971	+	3.60526	3.29892	Q5TDH0	194	Q5TDH0	Q5TDH0	Protein DDI1 homolog 2	DDI2	S				yes		QQDRARREQERIRLFSADPFDLEAQAKIEED	16.5617	15.7732	16.2692	18.4406	18.5068	19.2159	15.4104	15.2555	15.6005	2			1	1.55e-10	191.22	161.53	162.41	-0.41234	136630000	194	1875780	0	77976	0	0	41604	0	0
	0.367144	0.207249	+	1.40107	-0.727065	+	2.95663	-0.934313	Q9H3Q1	322	Q9H3Q1	Q9H3Q1	Cdc42 effector protein 4	CDC42EP4	S				yes		SSSLSSCTSGILEERSPAFRGPDRARAAVSR	17.7346	17.1331	17.0018	16.4356	16.5228	16.7298	17.6268	17.3904	17.4739	3			1	3.19e-64	302.11	272.36	44.299	-0.083782	249520000	322	1346960	4794.8	173130	0	0	104080	0	0
	1.1164	-0.271322	+	2.28565	-0.607447	+	1.43486	-0.336125	Q9NQW6	323	Q9NQW6	Q9NQW6	Actin-binding protein anillin	ANLN	S			yes			SCEGQNPELLPKTPISPLKTGVSKPIVKSTL	21.3964	21.5591	21.2788	20.7346	20.951	20.7264	20.9813	21.2413	21.1977	2			0.983477	0.00622706	109.02	20.651	97.965	-0.21653	990350000	323	20621300	0	2089200	0	0	2058300	0	0
	0.102412	0.0240669	+	2.19018	-0.440595	+	1.99938	-0.464662	Q86UU1	324	Q86UU1	Q86UU1	Pleckstrin homology-like domain family B member 1	PHLDB1	S				yes		ESPRLSRKGGHERPPSPGLRGLLTDSPAATV	16.3322	16.375	16.2231	16.0048	15.8413	15.7624	16.3134	16.4669	16.2222	4			1	0.000677236	101.96	76.758	69.522	0.35746	608470000	324	674888	2787.4	66706	0	0	62424	0	0
	0.474581	-0.0545254	+	2.04274	-0.301323	+	2.05929	-0.246798	P23511	326	P23511	P23511	Nuclear transcription factor Y subunit alpha	NFYA	S						KRGEGGRFFSPKEKDSPHMQDPNQADEEAMT	19.1504	19.125	19.0075	18.7277	18.8816	18.7697	19.0423	18.9981	19.0789	4			1	5.66e-84	354.26	318.31	314.57	-0.094814	372680000	326	4691170	8340.8	453490	0	0	398730	0	0
	0.138745	0.0210422	+	2.14299	-0.30748	+	3.4968	-0.328522	Q13469	326	Q13469	Q13469	Nuclear factor of activated T-cells, cytoplasmic 2	NFATC2	S			yes			ATDSPCGIPPKMWKTSPDPSPVSAAPSKAGL	16.1046	15.9564	15.9271	15.6442	15.7344	15.6869	16.0012	16.0388	16.0111	2			0.810552	4.41e-06	154.72	105.37	154.72	-0.34645	28265000	326	556050	0	57137	0	0	47072	0	0
	0.181228	0.029535	+	1.70392	0.620968	+	1.63299	0.591433	Q5TGY3	1549	Q5TGY3	Q5TGY3	AT-hook DNA-binding motif-containing protein 1	AHDC1	S						AAAGYGCPLLSDLTLSPVPRDSLLPLQDTAY	14.8223	14.6801	14.7101	15.2187	15.1802	15.6764	14.7631	14.8459	14.6921	2			0.996169	1.25e-10	143.39	128.6	143.39	0.20782	70741000	1549	302452	0	23886	0	0	19907	0	0
	0.202916	-0.103716	+	1.25337	-0.532577	+	1.93888	-0.42886	Q9Y6Y0	326	Q9Y6Y0	Q9Y6Y0	Influenza virus NS1A-binding protein	IVNS1ABP	S						IFCVIFLHGRNSPQSSPTSTPKLSKSLSFEM	15.2047	15.758	15.1949	14.7563	14.9935	14.81	15.2859	15.1673	15.3933	2			0.944986	0.000850943	107.99	70.814	107.99	-0.43486	19816000	326	336088	0	30981	0	0	41178	0	0
	0.0750178	0.0241998	+	1.92749	-0.476324	+	1.90413	-0.500524	O94782	327	O94782	O94782	Ubiquitin carboxyl-terminal hydrolase 1	USP1	S						ESPPKIIPKYISENESPRPSQKKSRVKINWL	19.231	19.4599	19.2401	18.9336	18.8898	18.6787	19.3716	19.4599	19.1721	3			1	4.31e-06	155.2	133.36	155.2	0.76792	484560000	327	5359510	6840.7	479040	0	0	499780	0	0
	1.37792	-0.55424	+	2.69351	1.02823	+	3.26688	1.58247	Q5TKA1	65	Q5TKA1	Q5TKA1	Protein lin-9 homolog	LIN9	S				yes		AVEMPFRNSKRSRLFSDEDDRQINTRSPKRN	16.5626	16.1327	16.2964	17.2642	17.3152	17.497	15.7141	15.5713	16.0436	3			1	0.00016482	116	97.46	116	-0.27618	94211000	65	958976	794.04	78019	0	0	53014	0	0
	0.0550291	0.0151075	+	2.18553	-0.523488	+	2.07369	-0.538595	Q5SYE7	328	Q5SYE7	Q5SYE7	NHS-like protein 1	NHSL1	S						GIVFPSRLDSDAGFHSLPRSGARANIQSLEP	16.6478	16.6355	16.8149	16.2689	16.2473	16.0115	16.8612	16.6681	16.6142	3			1	1.94e-05	151.8	134.43	151.8	0.29234	50386000	328	868315	482.55	82673	0	0	74413	0	0
	0.665104	-0.0570978	+	2.62697	-0.275834	+	2.75394	-0.218737	Q92922	328	Q92922	Q92922	SWI/SNF complex subunit SMARCC1	SMARCC1	S				yes		RRDRKASANARKRKHSPSPPPPTPTESRKKS	20.4239	20.4725	20.3566	20.1857	20.1167	20.123	20.3294	20.3967	20.3557	4			1	7.82e-07	160.67	131.28	160.67	0.47013	5487800000	328	11813200	20597	63277	1015000	0	54955	934310	0
	0.0599755	-0.046189	+	1.1913	-0.761994	+	1.539	-0.715805	Q14676	329	Q14676	Q14676	Mediator of DNA damage checkpoint protein 1	MDC1	S			yes			AEVHLERAQPFGFIDSDTDAEEERIPATPVV	18.1994	18.9985	18.3952	17.6855	17.5066	18.115	18.2911	18.6917	18.4717	4			0.999921	4.33e-72	309.82	283.65	309.82	-1.194	802190000	329	2941030	6888.5	237510	0	0	366140	0	0
	1.34721	0.375783	+	3.55177	0.968977	+	2.19674	0.593194	Q5UIP0	1688	Q5UIP0	Q5UIP0	Telomere-associated protein RIF1	RIF1	S			yes			NLRTRNAIKRLHKRDSFDNCSLGESSKIGIS	19.5654	19.8073	19.6194	20.5702	20.6391	20.6897	19.9578	20.2536	19.9079	4			0.999999	8.07e-22	225.39	192.68	225.39	-0.30865	558980000	1688	11188400	17999	601380	0	0	631660	0	0
	0.521576	-0.226998	+	2.21337	1.39836	+	2.82134	1.62536	Q5UIP0	2205	Q5UIP0	Q5UIP0	Telomere-associated protein RIF1	RIF1	S			yes			QEDEISSPVNKVRRVSFADPIYQAGLADDID	14.6682	14.157	14.7019	15.5162	16.065	16.1409	14.1839	14.4273	14.2348	4			1	3.67e-18	213.37	157.78	213.37	-0.49842	53589000	2205	334574	0	21510	0	0	13990	0	0
	0.46556	0.0821718	+	1.98621	-0.392676	+	2.95899	-0.474848	Q96S90	33	Q96S90	Q96S90	LysM and putative peptidoglycan-binding domain-containing protein 1	LYSMD1	S						GSRARSYGSLVQSACSPVRERRLEHQLEPGD	15.3104	15.2896	15.0883	14.8024	14.9332	14.7747	15.3011	15.2686	15.3652	3			0.996328	0.0058919	69.431	50.608	69.431	0.60135	87227000	33	325857	96.809	33292	0	0	30027	0	0
	0.0227174	-0.0064551	+	2.32748	-0.316364	+	1.72442	-0.309909	Q9UQK1	33	Q9UQK1	Q9UQK1	Protein phosphatase 1 regulatory subunit 3C	PPP1R3C	S			yes			SVMPVDVAMRLCLAHSPPVKSFLGPYDEFQR	19.0172	18.8534	18.8673	18.6275	18.5636	18.5977	18.8632	18.7958	19.0595	3			1	0.00233048	105.17	81.935	100.55	0.44255	116430000	33	4184440	6373.7	414200	0	0	332010	0	0
	0.318557	0.0886587	+	1.34125	0.404864	+	1.55744	0.316205	Q5VT25	1545	Q5VT25	Q5VT25	Serine/threonine-protein kinase MRCK alpha	CDC42BPA	S						SRKQMVRNINNKRRYSFRVPEEERMQQRREM	15.9053	15.5262	15.683	16.2835	15.9937	16.052	15.7939	15.8453	15.7413	3			0.980418	0.00725163	79.885	28.011	79.885	0.52492	110320000	1545	555426	0	49896	0	0	35221	0	0
	0.608605	-0.0626367	+	2.44031	-0.285474	+	2.81683	-0.222837	Q92922	330	Q92922	Q92922	SWI/SNF complex subunit SMARCC1	SMARCC1	S						DRKASANARKRKHSPSPPPPTPTESRKKSGK	20.4353	20.4904	20.3473	20.18	20.1103	20.1264	20.3315	20.399	20.3546	4			1	7.82e-07	160.67	131.28	160.67	0.47013	5189900000	330	11824000	22509.4	71699	1015000	0	66938	934310	0
+	1.47371	2.57904	+	1.14548	1.99853	+	1.99557	-0.580514	Q9P2B7	330	Q9P2B7	Q9P2B7	Cilia- and flagella-associated protein 97	CFAP97	S						HEPDVSSKSSSVLDSSLDHRHKQKVLHDTMD	14.4214	16.4939	17.1006	18.2217	17.9969	17.7928	18.6337	18.5476	18.5717	3			0.961725	5.02e-10	210.34	180.28	210.34	-0.11278	102490000	330	2402900	1759.2	18186	0	0	67635	0	0
	0.121733	0.0221157	+	1.68783	-0.266845	+	1.79898	-0.288961	O00499	331	O00499	O00499	Myc box-dependent-interacting protein 1	BIN1	S				yes		PEPAGGATPGATLPKSPSQLRKGPPVPPPPK	18.5936	18.483	18.4357	18.3046	18.2776	18.1295	18.5712	18.5752	18.4322	3			0.99835	2.36e-42	249.68	230.47	249.68	0.17809	2986600000	331	3198580	1241.9	310540	0	0	258620	0	0
	0.0754059	0.0228125	+	1.46229	-0.296046	+	2.4908	-0.318858	P48730	331	P48730	P48730	Casein kinase I isoform delta	CSNK1D	S						RHSRNPATRGLPSTASGRLRGTQEVAPPTPL	17.839	17.8374	17.557	17.46	17.4468	17.4384	17.7891	17.8412	17.6716	2			0.999994	0.00124898	133.23	54.671	133.23	-0.64436	185670000	331	1877240	3242.6	185880	0	0	167350	0	0
	0.448217	0.142691	+	1.62597	-0.479642	+	2.98357	-0.622334	Q16643	331	Q16643	Q16643	Drebrin	DBN1	T			yes			HRPGSHLDSHRRMAPTPIPTRSPSDSSTAST	14.2583	13.8247	14.0057	13.4561	13.62	13.5737	14.1618	14.0838	14.2711	3			0.999947	6.06e-05	89.129	75.284	89.129	3.66	41225000	331	142566	0	0	16277	0	0	11182	0
	0.145056	-0.0101935	+	2.45066	-0.347462	+	2.33233	-0.337269	P19484	332	P19484	P19484	Transcription factor EB	TFEB	S						QELEMQARVHGLPTTSPSGMNMAELAQQVVK	19.6289	19.6112	19.5815	19.2899	19.3358	19.1535	19.5998	19.5573	19.6338	3			0.885403	4.8e-72	335.45	305.02	335.45	0.22762	633330000	332	6700760	5711.1	627890	0	0	553460	0	0
	0.399247	-0.10795	+	1.80185	0.421392	+	2.42294	0.529342	Q5VT52	965	Q5VT52	Q5VT52	Regulation of nuclear pre-mRNA domain-containing protein 2	RPRD2	S			yes			STTGHLSLPQKQYPDSPHPVPHRSLFSPQNT	18.7529	18.9613	18.6543	19.1649	19.152	19.3158	18.5534	18.7945	18.6967	3			0.999999	0.000367185	119	92.27	111.34	0.15888	312840000	965	4558390	2386.9	346060	0	0	357070	0	0
	0.354315	0.075861	+	1.62042	-0.239722	+	1.70054	-0.315583	Q9NRE2	332	Q9NRE2	Q9NRE2	Teashirt homolog 2	TSHZ2	S						VTPAKKRVFDVNRPCSPDSTTGSFADSFSSQ	16.2965	16.1462	16.308	16.0061	15.938	16.0874	16.1934	16.4418	16.3432	3			0.967051	2.29e-05	101.86	81.412	101.86	1.0468	96124000	332	687504	1150.2	65102	0	0	53501	0	0
	1.04429	-0.123557	+	2.60009	-0.424225	+	1.86051	-0.300667	P08651	333	P08651	P08651	Nuclear factor 1 C-type	NFIC	S						EGGISSPVKKTEMDKSPFNSPSPQDSPRLSS	20.1307	20.2301	20.2138	19.7682	19.8617	19.6719	19.9959	20.1543	20.0537	3			0.999999	3.68e-32	252.13	226.15	252.13	0.45285	999600000	333	9604880	18551.3	309090	494020	80210	275700	492470	71888
	0.000714526	0.00045681	+	1.78025	1.1677	+	1.92313	1.16724	Q5VWG9	199	Q5VWG9	Q5VWG9	Transcription initiation factor TFIID subunit 3	TAF3	S						PEAEELPAMKRPRLLSTKGDTLDVVLLEARE	12.022	11.7355	12.3297	13.3186	12.7352	13.5366	12.2117	11.8076	12.0694	3			0.96187	0.00308138	74.698	59.306	74.698	0.30412	7691300	199	56440.5	0	3556.4	0	0	2733.4	0	0
	0.928333	-0.399337	+	2.76583	1.3535	+	4.42695	1.75284	Q5VZ89	1089	Q5VZ89	Q5VZ89	DENN domain-containing protein 4C	DENND4C	S						FKQQTPSRTHKERSTSLSALVRSSPHGSLGS	19.1596	18.5767	19.0678	20.3036	20.2764	20.2847	18.3607	18.6109	18.6346	2			0.995377	7.92e-14	248.68	204.7	248.68	0.38495	778560000	1089	6855190	0	456350	0	0	275500	0	0
	0.708793	-0.0339432	+	2.15665	-0.725467	+	2.09021	-0.691524	Q8IVT5	334	Q8IVT5	Q8IVT5	Kinase suppressor of Ras 1	KSR1	S						RIDDVSSMRFDLSHGSPQMVRRDIGLSVTHR	17.3117	17.2492	17.2726	16.7527	16.6242	16.2803	17.267	17.2384	17.2263	3			0.99894	0.000143507	130.47	106.99	130.47	-0.33547	89299000	334	1227870	2190.4	129860	0	0	112560	0	0
	0.133743	0.0127831	+	4.13696	-0.5386	+	4.90174	-0.551383	Q8WXI9	334	Q8WXI9	Q8WXI9	Transcriptional repressor p66-beta	GATAD2B	S						NLASHIQPGTVNRVSSPLPSPSAMTDAANSQ	17.3392	17.3665	17.2655	16.7823	16.7683	16.8047	17.3379	17.3672	17.3044	2			0.877859	1.1e-11	154.49	129.17	154.49	0.055662	1135400000	334	1330780	2481	132300	0	0	121820	0	0
	0.0629672	-0.0235812	+	1.50278	0.53577	+	1.98682	0.559352	Q5VZ89	810	Q5VZ89	Q5VZ89	DENN domain-containing protein 4C	DENND4C	S				yes		DRGEKRQKHFPERSCSFSSESRAGMLLKKSS	18.6748	18.3345	18.7149	19.3354	18.9973	18.9989	18.4543	18.6093	18.59	2			0.980968	3.75e-09	230.66	121.73	192.12	-0.33908	537970000	810	4154320	0	328180	0	0	233990	0	0
	1.39822	0.133235	+	4.70574	1.05703	+	4.89606	0.923795	Q5VZ89	948	Q5VZ89	Q5VZ89	DENN domain-containing protein 4C	DENND4C	S						RDLKTVSKDLRNKRSSLYGIAKVVQREDVET	17.9627	17.8728	17.9975	19.0369	19.0155	18.9517	18.0289	18.1042	18.0996	2			0.984856	0.00102897	142	83.18	142	0.25406	187760000	948	3300610	1384.7	202180	0	0	171390	0	0
	0.00494404	0.00164731	+	2.15249	0.696539	+	2.16773	0.694892	Q5VZK9	1039	Q5VZK9	Q5VZK9	Leucine-rich repeat-containing protein 16A	LRRC16A	S						EGVDEFFTKKVTKMDSKKWSTRGSESHELNE	17.4813	17.36	17.6319	18.372	18.2057	17.9851	17.549	17.5863	17.3429	3			0.998795	0.0374884	53.448	44.849	53.448	0.12775	132670000	1039	2071580	4621.2	145740	0	0	121290	0	0
	0.973929	0.182031	+	2.9572	0.788567	+	3.59713	0.606536	Q63HR2	120	Q63HR2	Q63HR2	Tensin-2	TNS2	S						SLNHSKQRSTLPRSFSLDPLMERRWDLDLTY	15.788	15.7599	16.0243	16.5968	16.7305	16.6107	16.0874	16.0295	16.0015	2			0.99609	5.68e-05	169.52	133.87	169.52	-0.50434	29561000	120	711917	0	46068	0	0	41232	0	0
	0.143668	-0.0980256	+	1.36292	0.789614	+	2.0543	0.88764	Q641Q2;Q9Y4E1	284;284	Q641Q2;Q9Y4E1	Q641Q2	WASH complex subunit FAM21A;WASH complex subunit FAM21C	FAM21A;FAM21C	S				yes		EEDIEDIEENTRPKRSRPTSFADELAARIKG	14.9866	14.2115	14.4898	15.1983	15.2104	15.648	14.5458	14.2418	14.6062	3			0.814737	0.0476458	48.288	22.171	48.288	0.059519	39451000	284	278291	0	0	26711	0	0	14514	0
	0.468408	-0.0812893	+	1.96861	-0.531622	+	1.72015	-0.450333	Q8WWM7	339	Q8WWM7	Q8WWM7	Ataxin-2-like protein	ATXN2L	S				yes		EEKHSAVQRQGSGRESPSLASREGKYIPLPQ	20.9515	20.8311	20.773	20.4854	20.3515	20.1238	20.8051	20.8413	20.6653	3			0.999545	9.67e-14	205.65	159.64	205.65	0.27773	4253600000	339	15003600	34531	1543700	0	0	1259800	0	0
	0.143668	-0.0980256	+	1.36292	0.789614	+	2.0543	0.88764	Q641Q2;Q9Y4E1	288;288	Q641Q2;Q9Y4E1	Q641Q2	WASH complex subunit FAM21A;WASH complex subunit FAM21C	FAM21A;FAM21C	S				yes		EDIEENTRPKRSRPTSFADELAARIKGDAMG;EDIEENTRPKRSRPTSFADELAARIKGDAVG	14.9866	14.2115	14.4898	15.1983	15.2104	15.648	14.5458	14.2418	14.6062	3			0.806974	0.0476458	48.288	22.171	48.288	0.059519	39451000	288	278291	0	0	26711	0	0	14514	0
	0.214962	-0.110287	+	2.89936	1.6747	+	4.47033	1.78499	Q676U5	287	Q676U5	Q676U5	Autophagy-related protein 16-1	ATG16L1	S				yes		AGGLLDSITNIFGRRSVSSFPVPQDNVDTHP	19.8103	19.2106	19.7694	21.3644	21.128	21.3221	19.5831	19.4388	19.4376	3			0.998694	1.11e-32	251.1	234.8	251.1	0.23694	581630000	287	13109400	9634.7	710370	0	0	422440	0	0
	0.161047	-0.0622616	+	3.02157	0.92764	+	3.18592	0.989902	Q68CZ2	776	Q68CZ2	Q68CZ2	Tensin-3	TNS3	S						GSSAEQPLGGRLRKLSLGQYDNDAGGQLPFS	18.395	18.0467	18.136	19.0978	19.1026	19.1602	17.9633	18.3118	18.1158	2			0.999995	8.85e-17	212.18	187.64	212.18	0.31854	545520000	776	3614810	0	271300	0	0	192710	0	0
+	2.07665	-0.569876	+	3.94069	1.19968	+	4.17272	1.76956	Q69YQ0	384	Q69YQ0	Q69YQ0	Cytospin-A	SPECC1L	S				yes		SESEGIPSIERSRKGSSGNASEVSVACLTER	17.2253	17.039	17.0006	18.2345	18.2641	18.3653	16.375	16.4822	16.6981	3			0.952101	1.5e-09	159.98	131.09	159.98	0.77534	782090000	384	1730790	0	122450	0	0	97683	0	0
	0.3729	-0.0414613	+	2.46305	-0.260094	+	2.43278	-0.218633	P49585	342	P49585	P49585	Choline-phosphate cytidylyltransferase A	PCYT1A	T						ERSPSPSFRWPFSGKTSPPCSPANLSRHKAA	17.8157	17.7824	17.694	17.4919	17.5448	17.4751	17.7794	17.7056	17.6827	2			0.936725	1.91e-08	198.87	132.84	198.87	0.1186	337730000	342	1883890	0	0	182950	0	0	161260	0
	0.0333222	-0.0189533	+	1.97475	-0.846387	+	4.04111	-0.827433	Q9P206	342	Q9P206	Q9P206	Uncharacterized protein KIAA1522	KIAA1522	S						SPASVRSLGRFSSVSSPQPRSRHPSSSSDTW	19.8918	19.8126	19.2986	18.856	18.8191	18.7887	19.7189	19.5564	19.6709	2			0.915526	4.79e-05	172.74	136.8	159.12	0.18991	209660000	342	6315800	1992	750870	0	0	633930	0	0
	1.10909	-0.107372	+	2.56039	-0.341248	+	2.0647	-0.233876	Q7L8J4	343	Q7L8J4	Q7L8J4	SH3 domain-binding protein 5-like	SH3BP5L	S						PDTDTLSLLSLRTVASDLQKCDSVEHLRGLS	19.6372	19.6761	19.5586	19.2516	19.2371	19.3595	19.4576	19.5408	19.5513	2			0.998646	7.25e-06	151.89	118.48	146.71	-1.4843	359600000	343	6631310	11340	413220	218290	0	386640	191550	0
	0.0877322	-0.0429916	+	1.17919	-0.382006	+	1.67633	-0.339015	Q86X27	343	Q86X27	Q86X27	Ras-specific guanine nucleotide-releasing factor RalGPS2	RALGPS2	S				yes		PSPRNLIPHGHRKCHSLGYNFIHKMNTAEFK	19.0456	19.0388	18.592	18.5495	18.5197	18.4611	18.7182	18.8123	19.017	3			0.999997	5.39e-05	144.12	104.46	144.12	0.32466	172670000	343	4011040	6414.8	422300	0	0	376210	0	0
+	2.76237	-0.325984	+	1.89428	0.250639	+	3.46016	0.576623	Q6GYQ0	860	Q6GYQ0	Q6GYQ0	Ral GTPase-activating protein subunit alpha-1	RALGAPA1	S						ERLRSGNASTMTRRGSSPGSLEIPKDLPDIL	18.2512	18.1698	18.2961	18.5002	18.5622	18.4065	17.9541	17.8734	17.9115	3			0.960111	3.89e-07	175.61	146.87	175.61	0.0081876	51438000	860	2812960	32.406	246020	0	0	209390	0	0
	0.3729	-0.0414613	+	2.46305	-0.260094	+	2.43278	-0.218633	P49585	347	P49585	P49585	Choline-phosphate cytidylyltransferase A	PCYT1A	S						PSFRWPFSGKTSPPCSPANLSRHKAAAYDIS	17.8157	17.7824	17.694	17.4919	17.5448	17.4751	17.7794	17.7056	17.6827	2			1	1.91e-08	198.87	132.84	198.87	0.1186	337730000	347	1883890	0	0	182950	0	0	161260	0
	0.345503	0.0323289	+	1.96862	-0.217715	+	1.91672	-0.250044	Q8TAQ2	347	Q8TAQ2	Q8TAQ2	SWI/SNF complex subunit SMARCC2	SMARCC2	S						REEEQEDLTKDMDEPSPVPNVEEVTLPKTVN	19.1922	19.2215	19.1647	18.9066	19.061	18.9577	19.1904	19.1896	19.2954	3			1	3.38e-50	259.59	235.27	86.557	0.67206	432060000	347	5249150	11869	466560	0	0	425570	0	0
	0.525145	0.140589	+	1.80031	-0.427155	+	2.69075	-0.567744	O60716	349	O60716	O60716	Catenin delta-1	CTNND1	S						YYWAPLAQHERGSLASLDSLRKGGPPPPNWR	17.6851	17.7849	17.4571	17.1834	17.1614	17.3008	17.7946	17.8923	17.662	2			0.999994	6.09e-07	209.8	98.735	155.26	0.29994	207080000	349	1759490	0	167390	0	0	161520	0	0
	0.0691366	0.0103022	+	2.32876	-0.278856	+	3.37197	-0.289159	Q15696	349	Q15696	Q15696	U2 small nuclear ribonucleoprotein auxiliary factor 35 kDa subunit-related protein 2	ZRSR2	S						NPNNEFWEANRDIYLSPDRTGSSFGKNSERR	19.4186	19.3167	19.2584	19.0377	19.0386	19.0809	19.2969	19.3721	19.3556	3			0.999991	6.01e-10	183.24	168.63	183.24	0.66169	653630000	349	5664380	12471	544240	0	0	453780	0	0
	0.861507	0.22028	+	3.80893	1.4326	+	3.41417	1.21232	Q6IQ26	193	Q6IQ26	Q6IQ26	DENN domain-containing protein 5A	DENND5A	S				yes		EDGEDTPVTKLQRFNSYDISRDTLYVSKCIC	13.3227	13.5115	13.5909	15.0377	14.8286	14.8567	13.8657	13.5695	13.6508	2			0.999876	0.0100942	99.752	52.149	99.752	-1.1499	12527000	193	173278	0	8614.2	0	0	9053.2	0	0
+	2.88347	0.812012	+	4.34972	1.37989	+	2.61162	0.567882	Q6NT76	148	Q6NT76	Q6NT76	Homeobox-containing protein 1	HMBOX1	S						SPTRYHANSMGQRSYSFEASEEDLDVDDKVE	13.0336	12.9796	13.1966	14.5118	14.4288	14.4089	13.8885	13.7448	14.0125	3			0.987112	1.86e-14	175.12	154.39	175.12	1.3958	41417000	148	144477	0	7076.3	0	0	6324.7	0	0
+	3.74092	0.64055	+	6.14009	2.18031	+	6.13594	1.53976	Q6NZI2	300	Q6NZI2	Q6NZI2	Polymerase I and transcript release factor	PTRF	S						ERREKLKTSRDKLRKSFTPDHVVYARSKTAV	15.7425	15.7526	15.8658	17.9686	17.9501	17.9832	16.4072	16.3941	16.4813	3			0.815339	2.1e-06	162.31	146.05	162.31	0.2533	80603000	300	1287200	0	44663	0	0	41031	0	0
	0.924096	0.275771	+	2.15219	-0.802397	+	2.28812	-1.07817	Q00587	350	Q00587	Q00587	Cdc42 effector protein 1	CDC42EP1	S				yes		DARQERVEVLPQARASWESLDEEWRAPQAGS	16.321	16.2924	16.4773	15.5783	15.8066	15.2986	16.7472	16.7847	16.3862	3			1	3.48e-06	127.92	115.49	127.92	-0.17771	44729000	350	712524	989.27	0	66200	0	0	59045	0
	0.251948	-0.0614204	+	2.25406	-0.520686	+	4.99297	-0.459266	Q9Y4H2	350	Q9Y4H2	Q9Y4H2	Insulin receptor substrate 2	IRS2	T				yes	yes	QTGLVRRSRTDSLAATPPAAKCSSCRVRTAS	20.2142	19.9533	19.9072	19.4971	19.5192	19.4963	19.9488	19.9485	19.9931	3			0.999851	0.000212118	141.54	110.31	107.75	0.535	808130000	350	8521540	8796.9	934940	0	0	697070	0	0
	1.27665	0.176956	+	3.20313	0.50214	+	2.08501	0.325184	Q6P1J6	1192	Q6P1J6	Q6P1J6	Phospholipase B1, membrane-associated;Phospholipase A2;Lysophospholipase	PLB1	S				yes		DMPAQAWDLVERMKNSPDINLEKDWKLVTLF	15.8862	15.8232	15.7653	16.2913	16.4031	16.2867	16.0964	15.9064	16.0028	3			1	0.0559634	46.891	19.776	46.891	0.36746	20759000	1192	632989	0	49248	0	0	43029	0	0
	0.330392	-0.0628904	+	1.5417	-0.273583	+	2.55202	-0.210693	Q96NB3	351	Q96NB3	Q96NB3	Zinc finger protein 830	ZNF830	S						LTIKELQKKEEENADSDDEGELQDLLSQDWR	18.9863	18.942	18.7369	18.616	18.663	18.5655	18.7963	18.8495	18.8307	3			1	1e-47	291.12	270.5	291.12	0.37742	1854000000	351	4073910	4629.7	405600	0	0	352450	0	0
	0.374977	-0.14933	+	2.10711	0.459197	+	1.662	0.608528	Q6P4F7	285	Q6P4F7	Q6P4F7	Rho GTPase-activating protein 11A	ARHGAP11A	S						GEYETPGEYKRKRRQSVGDFVSGALNKFKPN	15.4249	15.1989	15.3425	15.7148	15.717	15.9121	14.8989	15.19	15.4294	2			1	0.000148233	151.04	107.66	151.04	-0.4116	57071000	285	413223	0	35987	0	0	28244	0	0
	0.0669133	0.0457808	+	1.5552	0.884267	+	2.6257	0.838486	Q6P996	722	Q6P996	Q6P996	Pyridoxal-dependent decarboxylase domain-containing protein 1	PDXDC1	S						FKRSLRGSDALSETSSVSHIEDLEKVERLSS	17.1992	16.5485	17.2979	18.0921	17.9127	17.6936	17.1046	16.9791	17.0992	4			0.955792	9.42e-38	269.94	210.59	269.94	0.90721	120740000	722	1612130	3078	120290	0	0	70173	0	0
	0.174768	-0.0443201	+	1.40492	-0.498283	+	1.37434	-0.453963	Q9GZR1	352	Q9GZR1	Q9GZR1	Sentrin-specific protease 6	SENP6	S						DDDDDNDRTNRRESISPQPADSACSSPAPST	15.6017	15.3713	15.3536	14.978	14.6781	15.1758	15.2917	15.4606	15.4414	3			0.785401	4.19e-07	107.45	98.978	107.45	0.37194	158940000	352	359577	0	40585	0	0	31726	0	0
	0.284678	-0.050834	+	1.52358	0.396709	+	1.56828	0.447543	Q6PKG0	1056	Q6PKG0	Q6PKG0	La-related protein 1	LARP1	S						VVAGGGGGEGRKRCPSQSSSRPAAMISQPPT	16.2655	16.2616	16.3678	16.4662	16.8314	16.7874	16.1785	16.1905	16.3734	4			0.996518	2.78e-18	155.88	145.46	155.88	0.45708	2592900000	1056	814554	0	63743	0	0	57828	0	0
	0.155928	0.0182521	+	1.94089	-0.261262	+	1.90398	-0.279514	Q9UKS6	354	Q9UKS6	Q9UKS6	Protein kinase C and casein kinase substrate in neurons protein 3	PACSIN3	S						PQSPGSPGTGQDEEWSDEESPRKAATGVRVR	18.2336	18.2043	18.1496	17.8281	17.9993	17.9762	18.1607	18.1982	18.2832	3			0.999078	3.89e-60	280.94	250.91	280.94	-0.012354	2816700000	354	2591840	4307.2	243090	0	0	214320	0	0
	0.914461	-0.325249	+	1.9258	0.831853	+	2.70216	1.1571	Q6PKG0	165	Q6PKG0	Q6PKG0	La-related protein 1	LARP1	S						PAKVVRAAVPKQRKGSKVGDFGDAINWPTPG	18.0554	17.7904	17.5808	18.4012	18.6681	18.8529	17.2968	17.5758	17.5783	4			0.999117	0.0178168	53.259	40.071	53.259	0.1869	552920000	165	2570780	0	215340	0	0	162130	0	0
	0.196294	-0.0236092	+	2.42247	-0.309622	+	3.02393	-0.286013	P51991	358	P51991	P51991	Heterogeneous nuclear ribonucleoprotein A3	HNRNPA3	S				yes		YGPMKGGSFGGRSSGSPYGGGYGSGGGSGGY	19.5678	19.6334	19.485	19.2819	19.1966	19.2789	19.5132	19.571	19.5312	2			0.999989	4.72e-242	543.02	526.79	349.27	-0.23754	13308000000	358	6522940	0	602370	0	0	561820	0	0
	0.915254	-0.159198	+	1.86292	-0.383802	+	2.15432	-0.224604	O75122	360	O75122	O75122	CLIP-associating protein 2	CLASP2	S				yes		STVAGRVSAGSSKASSLPGSLQRSRSDIDVN	17.0869	16.8334	16.8585	16.6285	16.4967	16.5022	16.7675	16.7502	16.7835	2			0.978694	2.09e-05	164.9	92.468	164.9	-0.5725	55333000	360	995794	1362.3	111450	0	0	85037	0	0
	0.277373	0.209393	+	0.917607	0.690187	+	1.10359	0.480794	Q6PKG0	649	Q6PKG0	Q6PKG0	La-related protein 1	LARP1	T				yes		EIDDRDVNKILIVTQTPHYMRRHPGGDRTGN	17.5986	16.7842	17.7234	18.2079	18.29	17.6789	17.6192	17.4367	17.6785	3			0.999663	9.49e-05	152	121.11	99.481	-0.25428	200470000	649	2008610	0	157840	0	0	82258	0	0
	1.04732	-0.21307	+	2.15741	-0.542916	+	2.39313	-0.329846	Q9UHB6	362	Q9UHB6	Q9UHB6	LIM domain and actin-binding protein 1	LIMA1	S			yes			QVKSEVQQPVHPKPLSPDSRASSLSESSPPK	21.9627	22.2384	21.9552	21.4743	21.6102	21.443	21.8677	21.7972	21.8521	4			0.999763	4.33e-08	175.02	152.38	175.02	0.020053	8174000000	362	33158100	47198	3070800	0	0	3254000	0	0
	0.0793318	0.0304343	+	1.97725	0.995193	+	1.83366	0.964758	Q6UUV7	391	Q6UUV7	Q6UUV7	CREB-regulated transcription coactivator 3	CRTC3	S						TTNLSGPSRRRQPPVSPLTLSPGPEAHQGFS	14.8915	14.6315	14.7943	15.5546	15.5689	16.1794	14.9115	14.5788	14.9182	3			0.998934	4.29e-06	107.45	93.139	107.45	1.2717	51531000	391	356923	0	0	25037	0	0	19265	0
	0.164289	0.0342093	+	4.73043	1.74377	+	4.34687	1.70956	Q6UUV7	410	Q6UUV7	Q6UUV7	CREB-regulated transcription coactivator 3	CRTC3	S						LSPGPEAHQGFSRQLSSTSPLAPYPTSQMVS	14.3145	14.4334	14.4441	16.0325	16.2416	16.1491	14.5301	14.4595	14.305	2			0.839953	6.49e-07	114.72	90.377	114.72	-0.074338	181270000	410	366107	0	9616.9	7293.8	0	10073	6783.1	0
	0.412992	-0.163867	+	2.59419	-1.23839	+	3.78338	-1.07452	Q14244	365	Q14244	Q14244	Ensconsin	MAP7	S				yes		PPGSVKAAPAQVRPPSPGNIRPVKREVKVEP	16.6205	16.6698	16.144	15.1633	15.392	15.1638	16.2935	16.2972	16.3518	3			1	0.038586	40.756	22.654	40.756	0.42911	130120000	365	622423	0	81150	0	0	76152	0	0
	0.829497	-0.184458	+	1.96378	-0.462858	+	3.11783	-0.2784	Q15554	365	Q15554	Q15554	Telomeric repeat-binding factor 2	TERF2	S			yes			LDQKDLVLPTQALPASPALKNKRPRKDENES	21.4237	21.6898	21.361	20.9972	21.0686	21.0202	21.269	21.3437	21.3084	2			1	5.55e-22	242.9	201.74	216.29	0.65753	1785000000	365	23023200	16907	2128400	0	0	2248000	0	0
	0.811034	0.0829302	+	2.62857	-0.356703	+	2.71052	-0.439633	Q6VN20	365	Q6VN20	Q6VN20	Ran-binding protein 10	RANBP10	S						SLSSRSPKSQDSYPGSPSLSPRHGPSSSHMH	16.3702	16.3125	16.3965	16.0919	15.9762	15.9409	16.4485	16.5093	16.3701	2			0.88199	3.48e-05	147.75	112.11	147.75	-0.7501	57023000	365	722611	1470.2	68445	0	0	59848	0	0
+	2.95485	1.02638	+	6.15718	1.91965	+	2.76732	0.893275	Q6VY07	519	Q6VY07	Q6VY07	Phosphofurin acidic cluster sorting protein 1	PACS1	S			yes			TPRQKRSTPLKERQLSKPLSERTNSSDSERS	16.049	16.1468	16.0553	18.0005	18.0325	17.977	16.9758	17.346	17.0083	3			0.999798	0.0310628	57.804	28.717	57.804	-0.13079	87812000	519	1518780	1104.7	55018	0	0	53521	0	0
	2.00069	0.321122	+	2.34392	-0.391762	+	4.84574	-0.712885	P51812	369	P51812	P51812	Ribosomal protein S6 kinase alpha-3	RPS6KA3	S						TFYFDPEFTAKTPKDSPGIPPSANAHQLFRG	18.5261	18.4725	18.6917	18.1946	18.1389	18.1815	18.9195	18.8915	18.8426	3			0.971423	0.0150964	58.418	49.924	51.827	-0.065705	219260000	369	3569340	5892.3	296590	0	0	256800	0	0
	1.01422	-0.15424	+	1.99724	0.398176	+	2.80802	0.552416	Q6Y7W6	160	Q6Y7W6	Q6Y7W6	PERQ amino acid-rich with GYF domain-containing protein 2	GIGYF2	S				yes		GVFGRGGGREMHRSQSWEERGDRRFEKPGRK	20.3344	20.4761	20.27	20.8785	20.6741	20.7224	20.1773	20.2798	20.1606	2			0.999425	0.00107185	138.76	38.745	138.76	0.19733	2163700000	160	13297100	2866.6	1014600	0	0	991630	0	0
	0.849129	-0.0785249	+	2.38237	-0.32129	+	2.36919	-0.242765	P14618	37	P14618	P14618	Pyruvate kinase PKM	PKM	S			yes			MADTFLEHMCRLDIDSPPITARNTGIICTIG	19.9618	20.0187	19.8831	19.5832	19.7073	19.6093	19.8521	19.8663	19.9096	2			1	1.04e-09	214.78	150.96	214.78	0.19961	1251000000	37	8413580	0	787500	0	0	728470	0	0
	0.801773	-0.0864188	+	2.43023	-0.302322	+	3.11445	-0.215903	Q13541	37	Q13541	Q13541	Eukaryotic translation initiation factor 4E-binding protein 1	EIF4EBP1	T				yes		VLGDGVQLPPGDYSTTPGGTLFSTTPGGTRI	19.078	19.118	18.9614	18.759	18.7733	18.7182	18.9432	18.9567	18.9984	3			0.802109	1.13e-09	127.98	106.88	108.14	0.14752	2103500000	37	4510160	5120.9	0	431700	0	0	396870	0
	0.232385	0.10638	+	2.45233	-1.04941	+	3.46971	-1.15579	Q96BD0	37	Q96BD0	Q96BD0	Solute carrier organic anion transporter family member 4A1	SLCO4A1	T						NGLDHTPPSRRASPGTPLSPGSLRSAAHSPL	17.4576	16.9839	16.9731	16.1821	16.106	15.9784	17.4059	17.1359	17.192	2			0.999994	1.03e-21	254.47	190.37	254.47	-0.0086705	108710000	37	1106630	0	143400	0	0	94117	0	0
	0.578766	0.213764	+	3.6443	2.06381	+	4.56313	1.85004	Q6Y7W6	201	Q6Y7W6	Q6Y7W6	PERQ amino acid-rich with GYF domain-containing protein 2	GIGYF2	S				yes		GPTSVGRKHEFIRSESENWRIFREEQNGEDE	17.0217	17.5399	17.3682	19.4728	19.268	19.3805	17.4015	17.5657	17.6039	2			0.999988	0.000455048	172.28	113.37	172.28	-0.14584	244760000	201	3315330	0	106610	0	0	136930	0	0
	1.06726	-0.388304	+	2.73971	1.16477	+	4.58921	1.55307	Q6Y7W6	242	Q6Y7W6	Q6Y7W6	PERQ amino acid-rich with GYF domain-containing protein 2	GIGYF2	S						RDGERWRPHSPDGPRSAGWREHMERRRRFEF	18.2579	17.769	17.8072	19.1512	19.0857	19.0915	17.5674	17.4339	17.6679	4			1	7.69e-05	125.75	114.96	125.75	0.17513	676770000	242	3163470	0	54879	192270	0	36758	123040	0
	0.192223	-0.0717312	+	1.42466	-0.467672	+	2.11147	-0.395941	Q53SF7	371	Q53SF7	Q53SF7	Cordon-bleu protein-like 1	COBLL1	S						ASCIVKSMSVDETDKSPCEAGRVRAGSLQLS	13.4655	13.8476	13.8991	13.1342	13.3483	13.3267	13.7305	13.5874	13.6792	3			0.882009	0.0207361	54.668	44.183	54.668	-0.46571	40384000	371	110081	0	9492.6	0	0	11356	0	0
	1.35737	-0.431896	+	2.16659	0.793259	+	4.7104	1.22515	Q6Y7W6	30	Q6Y7W6	Q6Y7W6	PERQ amino acid-rich with GYF domain-containing protein 2	GIGYF2	S						LRALSSGGSITSPPLSPALPKYKLADYRYGR	19.3502	19.0301	18.847	19.8211	19.8224	19.9636	18.6551	18.6014	18.6751	2			0.999985	2.65e-32	254.58	224.01	158.17	0.69414	1673800000	30	5962020	0	149280	370230	0	129610	244430	0
	0.816607	-0.247085	+	2.07087	-0.715913	+	1.54871	-0.468828	O43303	372	O43303	O43303	Centriolar coiled-coil protein of 110 kDa	CCP110	S						LTGSYAKLPSPEPSMSPKMHRRRSRTSSACH	17.7572	17.8746	17.5167	17.0154	17.1733	16.8122	17.3246	17.641	17.4418	2			0.999732	0.000178927	131.13	92.728	131.13	-1.1992	191430000	372	1564440	0	175810	0	0	171600	0	0
	0.406561	-0.0652053	+	2.12984	-0.324939	+	2.72534	-0.259734	O60504	373	O60504	O60504	Vinexin	SORBS3	S						YPSSTRDPSASNGGGSPARREEKKRKAARLK	17.4673	17.632	17.4328	17.1782	17.1547	17.2244	17.4891	17.3902	17.4572	4			0.999995	2.85e-07	115.66	95.674	96.708	-0.58621	210190000	373	1549820	1719.6	144350	0	0	145710	0	0
	0.806404	-0.174871	+	2.7766	-0.802596	+	2.81333	-0.627725	Q9UHB6	374	Q9UHB6	Q9UHB6	LIM domain and actin-binding protein 1	LIMA1	S			yes			KPLSPDSRASSLSESSPPKAMKKFQAPARET	22.3162	22.2329	22.0269	21.2689	21.4827	21.4166	21.9154	22.053	22.0831	2			0.983108	4.82e-14	207.53	176.57	138.24	-1.751	8631600000	374	35142100	77212	3794900	110720	0	3093800	148210	0
	0.248075	0.128866	+	1.64485	-0.757643	+	3.2513	-0.88651	O75815	375	O75815	O75815	Breast cancer anti-estrogen resistance protein 3	BCAR3	S						CPNSPVFRTGSEPALSPAVVRRVSSDARAGE	19.0473	18.7229	18.361	17.9751	18.0608	17.8223	18.9134	18.7327	18.8717	2			0.999999	3.59e-11	201.06	141.64	201.06	0.35758	491840000	375	3460600	0	422800	0	0	304040	0	0
	0.259091	-0.0486558	+	1.65651	-0.270605	+	2.30895	-0.221949	Q01094	375	Q01094	Q01094	Transcription factor E2F1	E2F1	S						SRMGSLRAPVDEDRLSPLVAADSLLEHVRED	15.8945	16.0613	16.127	15.7763	15.7028	15.7919	15.9647	16.0336	15.9386	4			1	3.53e-28	229.6	205.56	229.6	0.04236	111680000	375	565665	1569.4	49528	0	0	50523	0	0
	1.85189	-0.4247	+	1.2776	0.527384	+	2.29572	0.952085	Q6ZRS2	2724	Q6ZRS2	Q6ZRS2	Helicase SRCAP	SRCAP	T						SSPEGPSPARPPRRRTSADVEIRGQGTGRPG	14.2568	14.5077	14.1895	14.8627	14.5467	15.1268	13.8702	13.8535	13.9563	3			0.936924	0.0254613	75.479	26.682	75.479	0.80648	31866000	2724	200297	0	16259	0	0	17723	0	0
	0.396264	-0.0346231	+	2.81567	-0.467333	+	2.50067	-0.43271	Q9Y3X0	376	Q9Y3X0	Q9Y3X0	Coiled-coil domain-containing protein 9	CCDC9	S						YSDHDDRWETKEGAASPAPETPQPTSPETSP	15.5942	15.6333	15.639	15.1135	15.2712	15.0798	15.6331	15.6087	15.5207	2			0.999974	7.32e-07	112.56	95.054	112.56	-0.56512	103210000	376	408634	0	40379	0	0	37858	0	0
	1.19434	-0.441569	+	3.08902	1.52272	+	5.16412	1.96429	Q6ZRV2	1025	Q6ZRV2	Q6ZRV2	Protein FAM83H	FAM83H	S						TEAATEERGPRARLSSATANALYSSNLRDDT	17.0213	16.4722	16.8796	18.2996	18.2668	18.3748	16.3226	16.4567	16.269	3			0.971261	1.13e-13	198.56	155.23	198.56	-0.39857	321530000	1025	1656490	0	106580	0	0	66653	0	0
	0.540801	-0.147436	+	1.58611	0.482306	+	3.00465	0.629743	Q6ZRV2	974	Q6ZRV2	Q6ZRV2	Protein FAM83H	FAM83H	S						MEVLRKGSLRLRQLLSPKGERRMEDEGGFPV	16.0316	15.816	15.617	16.3068	16.178	16.4267	15.6847	15.6487	15.6889	3			1	0.00545367	78.324	44.059	78.324	-1.2433	0	974	586250	0	54370	0	0	42820	0	0
	1.06378	-0.266989	+	3.66739	1.81201	+	4.03649	2.079	Q6ZSR9	285	Q6ZSR9	Q6ZSR9	Uncharacterized protein FLJ45252		S						EAVSGPMAGKPFRPQSLSKYSRHYSPEDEPS	15.4978	15.7771	15.5063	17.3139	17.2825	17.6208	15.4688	15.2188	15.2926	3			0.943159	0.00343663	64.295	50.883	64.295	-0.77072	180140000	285	845630	0	37815	0	0	41712	0	0
	1.29003	-0.212413	+	1.65843	0.528655	+	2.25265	0.741069	Q6ZSZ5	1124	Q6ZSZ5	Q6ZSZ5	Rho guanine nucleotide exchange factor 18	ARHGEF18	S						RHSPAPPPDPGFPAPSPPPADSPSEGFSLKA	17.5633	17.6063	17.3939	17.9354	17.905	18.3091	17.2269	17.3342	17.3652	3			0.999989	1.29e-12	144.45	132.6	144.45	-0.24178	152510000	1124	1926090	0	154090	0	0	143200	0	0
	0.121011	0.0718946	+	1.34256	0.56597	+	1.85805	0.494075	Q6ZU35	874	Q6ZU35	Q6ZU35	Uncharacterized protein KIAA1211	KIAA1211	S						NCDQQAEQKKKKRHSSTGDSADAGPPAAGSA	14.6396	14.0597	14.617	14.9688	14.9347	15.1108	14.6881	14.5193	14.3246	3			0.762256	1.43e-17	204.5	182.66	204.5	-0.67544	131630000	874	244982	1610.6	21097	0	0	13102	0	0
	0.626394	-0.139856	+	2.34117	0.463896	+	2.65579	0.603753	Q6ZUT9	1076	Q6ZUT9	Q6ZUT9	DENN domain-containing protein 5B	DENND5B	S				yes		RTPPQQKSPTTARRLSITSLTGKNNKPNAGQ	18.9441	19.0626	19.1785	19.5985	19.446	19.5324	18.8242	18.8737	19.0677	2			0.999976	0.00030859	174.72	144.15	174.72	-0.032273	362020000	1076	5551300	0	394140	0	0	382310	0	0
	0.691481	-0.228932	+	1.52035	0.557518	+	2.32501	0.78645	Q70E73	610	Q70E73	Q70E73	Ras-associated and pleckstrin homology domains-containing protein 1	RAPH1	S						MESMNRPYTSLVPPLSPQPKIVTPYTASQPS	18.9277	18.5759	18.5229	19.1671	19.0804	19.4515	18.545	18.2855	18.5092	3			0.99962	0.000141519	88.841	67.831	88.841	-0.50792	735210000	610	4329900	0	389740	0	0	275340	0	0
	0.580647	0.119695	+	2.31873	-0.370802	+	2.61198	-0.490497	Q13480	381	Q13480	Q13480	GRB2-associated-binding protein 1	GAB1	S				yes		ASDTDSSYCIPTAGMSPSRSNTISTVDLNKL	15.0026	14.8177	14.8193	14.4654	14.5188	14.5429	15.0697	14.8628	15.0661	2			0.85316	9.12e-05	101.15	82.553	101.15	1.4165	84853000	381	260879	462.61	27002	0	0	21843	0	0
	1.17069	-0.34148	+	1.60669	0.747115	+	2.28876	1.0886	Q70E73	856	Q70E73	Q70E73	Ras-associated and pleckstrin homology domains-containing protein 1	RAPH1	S						PKQQSFCAKPPPSPLSPVPSVVKQIASQFPP	18.0064	17.7771	17.6151	18.355	18.3779	18.9069	17.3962	17.3669	17.611	3			0.994157	1.73e-13	159.13	140.34	159.13	1.374	289750000	856	2488810	0	208280	0	0	160680	0	0
	0.101781	-0.0353756	+	2.62714	-1.24014	+	2.61547	-1.20476	O43237	383	O43237	O43237	Cytoplasmic dynein 1 light intermediate chain 2	DYNC1LI2	S						SLLAKQPATPTRASESPARGPSGSPRTQGRG	17.8888	17.9552	17.6515	16.8584	16.5966	16.3201	17.8283	17.9239	17.6371	3			0.991037	3.41e-05	142.88	121.82	142.88	-0.35974	371230000	383	1660100	3811.9	192280	0	0	181190	0	0
+	2.15447	0.912906	+	3.58262	2.17733	+	4.39091	1.26443	Q765P7	456	Q765P7	Q765P7	MTSS1-like protein	MTSS1L	S				yes		SPAASDLAMVLTRGLSLEHQKSSRDSLQYSS	15.9747	16.5725	16.2343	18.5252	18.4147	18.3737	17.1409	17.265	17.1145	2			1	9.46e-05	158.79	99.809	158.79	-0.85509	121100000	456	1870630	2071.8	52306	0	0	71318	0	0
	0.367478	-0.12101	+	2.28938	0.514588	+	1.93047	0.635598	Q765P7	601	Q765P7	Q765P7	MTSS1-like protein	MTSS1L	S						IRPPIVPVKTPTVPDSPGYMGPTRAGSEECV	14.4835	14.3811	14.2843	14.7619	14.9205	15.0102	14.4259	14.0163	14.3436	2			0.95963	0.0166135	62.357	42.779	62.357	0.6262	31142000	601	219664	0	18971	0	0	16272	0	0
	0.131263	-0.0285778	+	3.16238	-0.455193	+	2.52419	-0.426615	Q6P6C2	384	Q6P6C2	Q6P6C2	RNA demethylase ALKBH5	ALKBH5	S						RKSYESSEDCSEAAGSPARKVKMRRH_____	19.4446	19.6056	19.5286	19.0491	19.0897	19.0743	19.4328	19.628	19.4322	3			1	1.2e-24	243.19	200.87	243.19	0.21368	441600000	384	6192600	26443.4	510060	43896	0	519440	31905	0
	1.67043	-0.393115	+	2.48911	1.09209	+	3.11776	1.4852	Q7L2J0	152	Q7L2J0	Q7L2J0	7SK snRNA methylphosphate capping enzyme	MEPCE	S						QPHRPPGGGGGKRRNSCNVGGGGGGFKHPAF	20.001	19.7248	19.7477	20.7539	20.7817	21.2142	19.3232	19.4396	19.5314	4			1	1.11e-05	111.06	95.749	111.06	-0.22775	1005900000	152	11571200	30362	808790	0	0	597510	0	0
	0.624267	-0.134564	+	2.00575	-0.422941	+	2.33432	-0.288376	P35269	385	P35269	P35269	General transcription factor IIF subunit 1	GTF2F1	S						PKRERKPSGGSSRGNSRPGTPSAEGGSTSST	18.3589	18.5451	18.2458	17.9911	17.9845	17.9054	18.2447	18.3239	18.1776	3			0.99993	1.39e-06	127.15	107.94	127.15	-0.041478	283770000	385	2720300	1228.5	0	264720	0	0	269700	0
	0.198877	0.0267855	+	2.73224	-0.414218	+	3.82458	-0.441004	Q8ND30	385	Q8ND30	Q8ND30	Liprin-beta-2	PPFIBP2	S						PLPQKSLETRAQKKLSCSLEDLRSESVDKCM	16.8965	17.0533	16.9147	16.4941	16.5389	16.589	16.9792	16.9563	17.0094	3			0.847172	0.00030438	103.1	76.049	103.1	-0.48353	87210000	385	1059400	0	97912	0	0	98628	0	0
	0.185674	-0.0304864	+	1.60568	-0.302074	+	1.83371	-0.271587	Q9C0B0	385	Q9C0B0	Q9C0B0	RING finger protein unkempt homolog	UNK	S				yes		LCRNSSLGSPSNLCGSPPGSIRKPPNLEGIV	18.098	17.9829	17.8936	17.5888	17.6751	17.8044	17.9656	17.9231	17.9942	2			0.999997	5.24e-24	229.98	202.57	229.98	0.44705	1131800000	385	2198750	880.46	221670	0	0	184600	0	0
	0.904137	0.643818	+	2.21986	1.57457	+	1.57535	0.930754	Q7L7X3	445	Q7L7X3	Q7L7X3	Serine/threonine-protein kinase TAO1	TAOK1	S						SHYRNREHFATIRTASLVTRQMQEHEQDSEL	16.0753	15.2821	15.9757	17.6639	17.1346	17.2583	16.8343	16.3445	16.0858	2			0.983228	0.0126308	100.25	14.11	100.25	0.24384	125420000	445	1003050	0	56011	0	0	29875	0	0
	1.06176	-0.142241	+	1.77762	0.239895	+	3.90877	0.382135	Q7L804	277	Q7L804	Q7L804	Rab11 family-interacting protein 2	RAB11FIP2	S						VPESGSLKSPHRRTLSFDTSKMNQPDSIVDE	19.0147	19.0063	18.8336	19.1712	19.2177	19.1855	18.7775	18.799	18.8515	2			0.994646	0.000348531	98.04	74.085	81.865	0.07394	284960000	277	4773850	0	413520	0	0	368070	0	0
	0.0895435	-0.0382468	+	1.61871	0.708506	+	2.15372	0.746753	Q7LBC6	798	Q7LBC6	Q7LBC6	Lysine-specific demethylase 3B	KDM3B	S				yes		FSQENKAPFEAVKRFSLDERSLACRQDSDSS	15.1296	14.6867	15.1094	15.5228	15.5683	15.96	14.9477	14.8501	15.0131	3			1	0.00311418	114.4	74.198	114.4	-0.086936	30528000	798	363260	0	29439	0	0	19995	0	0
	2.23648	-0.162719	+	3.79702	-0.563604	+	2.90177	-0.400885	Q8ND30	387	Q8ND30	Q8ND30	Liprin-beta-2	PPFIBP2	S						PQKSLETRAQKKLSCSLEDLRSESVDKCMDG	18.3196	18.3014	18.2904	17.8201	17.7007	17.6999	18.0839	18.179	18.1604	4			0.976258	0.00210089	81.967	60.351	81.967	0.34481	121800000	387	2489930	4822.8	257730	0	0	228830	0	0
	0.119923	-0.0401541	+	1.12795	-0.35077	+	1.46609	-0.310616	P35269	389	P35269	P35269	General transcription factor IIF subunit 1	GTF2F1	T				yes		RKPSGGSSRGNSRPGTPSAEGGSTSSTLRAA	17.2359	16.9062	16.8754	16.5043	16.6458	16.8151	17.045	16.9191	16.933	3			0.99082	4.1e-08	137.4	96.884	97.346	0.19102	345270000	389	1100040	2497.9	123330	0	0	89316	0	0
	0.0390144	-0.00745583	+	1.95243	-0.29073	+	3.88804	-0.283274	Q13884	389	Q13884	Q13884	Beta-1-syntrophin	SNTB1	S						PLLATRLVHSGPGKGSPQAGVDLSFATRTGT	20.1121	20.2077	19.9881	19.837	19.8115	19.7871	20.1212	20.0844	20.0799	4			0.999999	6.59e-37	264.33	249.02	264.33	-0.14351	845550000	389	9571600	9241.8	872240	0	0	827450	0	0
	0.624267	-0.134564	+	2.00575	-0.422941	+	2.33432	-0.288376	P35269	391	P35269	P35269	General transcription factor IIF subunit 1	GTF2F1	S						PSGGSSRGNSRPGTPSAEGGSTSSTLRAAAS	18.3589	18.5451	18.2458	17.9911	17.9845	17.9054	18.2447	18.3239	18.1776	3			0.844351	1.39e-06	127.15	107.94	127.15	-0.041478	283770000	391	2720300	1228.5	0	264720	0	0	269700	0
	1.52586	-0.502542	+	1.86786	0.704456	+	3.2425	1.207	Q7Z333	1366	Q7Z333	Q7Z333	Probable helicase senataxin	SETX	S				yes		QRQIRPKSQKNRRRLSDCESTDVKRAGSHTA	16.1739	15.7111	15.9982	16.6416	16.5075	16.8474	15.4202	15.3606	15.5947	3			0.999954	0.00240538	89.136	68.473	89.136	-0.22366	97311000	1366	663547	4144.8	59892	0	0	39898	0	0
	0.15615	-0.0376975	+	2.32872	-0.429331	+	1.60233	-0.391633	Q8WWM7	391	Q8WWM7	Q8WWM7	Ataxin-2-like protein	ATXN2L	S						LSSLPPRGPHHLDNSSPGPGSEARGINGGPS	16.6892	16.6332	16.7203	16.3916	16.1623	16.2007	16.7707	16.6812	16.4776	3			0.995366	5.24e-06	135.31	116.72	108.27	-0.073292	80820000	391	860356	371.01	85032	0	0	74296	0	0
	0.00382217	-0.000874201	+	2.046	-0.507819	+	2.39445	-0.506945	Q9Y4H2	391	Q9Y4H2	Q9Y4H2	Insulin receptor substrate 2	IRS2	S				yes		AAAGARPVSVAGSPLSPGPVRAPLSRSHTLS	19.0312	19.0567	18.8356	18.4065	18.6271	18.3664	18.9213	19.01	18.9896	4			0.999995	1.97e-50	246.45	228.36	246.45	-0.67767	877840000	391	4189870	12053.1	282260	135930	0	261070	119710	0
	1.09144	-0.128257	+	2.06206	0.71696	+	2.29215	0.845217	Q7Z3K3	746	Q7Z3K3	Q7Z3K3	Pogo transposable element with ZNF domain	POGZ	S						PPVQRSIQKRAVRKMSVMGRQTCLECSFEIP	15.4347	15.333	15.3314	16.0409	15.8552	16.3539	15.1816	15.3235	15.2093	3			1	0.0567369	40.244	26.009	40.244	1.0455	0	746	467633	0	36227	0	0	30918	0	0
	0.370825	-0.1036	+	3.45462	1.70587	+	3.51036	1.80947	Q7Z3T8	939	Q7Z3T8	Q7Z3T8	Zinc finger FYVE domain-containing protein 16	ZFYVE16	S			yes	yes		PNNETGDITRNEIIQSPISQVPSVEKLSMNT	14.6272	14.5337	14.358	16.1003	16.067	16.4692	14.2336	14.4573	14.5173	2			0.925641	0.00500916	78.234	58.396	78.234	-0.22601	48795000	939	385416	0	20918	0	0	18036	0	0
	1.43783	0.206661	+	4.10579	0.968495	+	4.60405	0.761834	Q7Z401	1225	Q7Z401	Q7Z401	C-myc promoter-binding protein	DENND4A	S						MYMNNMSSPLTSRTPSIDLQRACDDKLNKKS	14.6247	14.5371	14.4246	15.4808	15.5109	15.5001	14.669	14.7737	14.7637	2			0.774173	0.00191237	140.78	62.63	140.78	-0.34045	29638000	1225	301017	0	20883	0	0	18078	0	0
	0.00531453	0.00160185	+	1.76006	-0.546099	+	1.96832	-0.547701	Q8IWQ3	393	Q8IWQ3	Q8IWQ3	Serine/threonine-protein kinase BRSK2	BRSK2	S						PERKSMEVLSVTDGGSPVPARRAIEMAQHGQ	15.8456	15.8506	15.5928	15.4075	15.2191	15.0241	15.7665	15.8504	15.6769	3			0.999982	5.36e-08	144.82	111.52	144.82	-0.45561	68011000	393	446884	0	47908	0	0	43832	0	0
	0.136398	-0.0325209	+	2.76701	-0.616418	+	3.16564	-0.583897	Q99501	394	Q99501	Q99501	GAS2-like protein 1	GAS2L1	S						RRERPSRRLTTGTPASPRRPPALRSQSRDRL	17.4881	17.4984	17.2733	16.8267	16.8538	16.73	17.4825	17.3571	17.3225	2			0.999817	0.00178762	112.94	58.215	112.94	-2.3891	104830000	394	1379400	748.87	146400	0	0	133150	0	0
	0.178162	0.0442308	+	2.35938	-0.537952	+	4.03895	-0.582183	Q68DQ2	395	Q68DQ2	Q68DQ2	Very large A-kinase anchor protein	CRYBG3	S						CSALLTGSNHRKVPCSPDFQRVTTTENTIKE	17.8352	17.6166	17.5342	17.1481	17.0788	17.1451	17.7482	17.6511	17.7193	3			1	0.013272	73.877	55.3	73.877	0.26594	101740000	395	1701450	4791.3	185390	0	0	144200	0	0
	0.474763	-0.130266	+	1.51781	0.447271	+	2.98876	0.577537	Q7Z417	230	Q7Z417	Q7Z417	Nuclear fragile X mental retardation-interacting protein 2	NUFIP2	S				yes		ESGYTTPKKRKARRNSAKGCENLNIVQDKIM	21.0547	20.6767	20.7263	21.2004	21.199	21.4002	20.7018	20.6951	20.6702	3			1	5e-22	240.6	199.75	240.6	-2.0149	2113200000	230	18871100	46113	1656000	0	0	1135300	0	0
	0.0722705	-0.0306117	+	1.92608	-0.644463	+	3.478	-0.613852	Q8WUF5	395	Q8WUF5	Q8WUF5	RelA-associated inhibitor	PPP1R13L	S			yes			NAFWEHGASRAMLPGSPLFTRAPPPKLQPQP	18.9203	18.6579	18.426	18.0917	17.9744	18.0048	18.6706	18.685	18.5568	2			1	1.06e-06	172.74	139.68	119.45	0.2634	357840000	395	3266800	314.6	387820	0	0	291000	0	0
	1.02873	0.292251	+	1.53592	-0.261182	+	1.96699	-0.553432	Q05397	397	Q05397	Q05397	Focal adhesion kinase 1	PTK2	Y			yes			QGMRTHAVSVSETDDYAEIIDEEDTYTMPST	15.0635	14.8835	15.0981	14.8369	14.7085	14.7162	15.5282	15.1377	15.256	3			0.999995	2.21e-52	278.26	264.02	278.26	2.0179	101330000	397	308911	0	28145	0	0	22834	0	0
	1.13555	0.170197	+	1.83527	-0.27527	+	3.51282	-0.445467	Q9Y6G9	398	Q9Y6G9	Q9Y6G9	Cytoplasmic dynein 1 light intermediate chain 1	DYNC1LI1	S						LAKQPPTAAGRPVDASPRVPGGSPRTPNRSV	15.7584	15.5481	15.6009	15.3805	15.317	15.384	15.7465	15.8525	15.8189	3			0.998087	0.00803506	58.26	35.947	40.349	-1.5259	357380000	398	455826	664.4	45150	0	0	35743	0	0
	0.548444	-0.143997	+	2.88063	-0.896459	+	3.24946	-0.752463	Q3KQU3	399	Q3KQU3	Q3KQU3	MAP7 domain-containing protein 1	MAP7D1	S						PAGERGERRKPNAGGSPAPVRRRPEASPVQK	13.5438	13.8868	13.6579	12.8265	12.867	12.7057	13.6674	13.4969	13.4923	3			1	0.0400351	46.3	20.641	46.3	-0.38285	26230000	399	96265	0	10012	0	0	11660	0	0
	0.517472	-0.22182	+	2.28284	1.03179	+	5.84603	1.25361	Q7Z460	646	Q7Z460	Q7Z460	CLIP-associating protein 1	CLASP1	S						PGSYASLGRIRTRRQSSGSATNVASTPDNRG	18.9519	18.356	18.8684	19.7733	19.7532	19.7452	18.5436	18.4537	18.5135	2			0.994067	3.39e-29	256.7	217.19	135.09	0.048742	1405300000	646	5316330	0	373090	23148	0	219280	18126	0
	0.415043	-0.215158	+	2.81761	1.23933	+	2.9196	1.45448	Q7Z460	649	Q7Z460	Q7Z460	CLIP-associating protein 1	CLASP1	S						YASLGRIRTRRQSSGSATNVASTPDNRGRSR	14.7761	14.5411	15.0488	16.0256	15.9155	16.1429	14.7294	14.2442	14.7469	2			0.835211	2.58e-05	135.09	124.03	135.09	0.048742	70422000	649	376346	0	0	23148	0	0	18126	0
	0.0809113	-0.0121358	+	2.34854	-0.372066	+	2.3745	-0.359931	P54819	4	P54819	P54819	Adenylate kinase 2, mitochondrial;Adenylate kinase 2, mitochondrial, N-terminally processed	AK2	S						____________MAPSVPAAEPEYPKGIRAV	16.9873	16.9454	17.0807	16.5423	16.6375	16.7174	16.9423	16.9757	17.0591	2			1	2.1e-06	171.21	146.28	171.21	-0.32391	83854000	4	1101130	2516.4	104150	0	0	91705	0	0
	0.394098	0.203523	+	1.47938	0.704464	+	2.057	0.500941	Q7Z4H7	805	Q7Z4H7	Q7Z4H7	HAUS augmin-like complex subunit 6	HAUS6	S				yes		NSSSSSEANFKLEPNSPMHGGTLLEDVVGGR	12.0378	11.3572	11.8883	12.3774	12.3984	12.6208	12.0532	11.8262	12.0145	3			0.999871	0.00389436	61.801	42.968	61.801	-0.14596	8977000	805	40672.3	0	3594.7	0	0	2117.8	0	0
	0.938724	0.22279	+	1.63111	-0.24297	+	2.2162	-0.465761	Q9NPI6	401	Q9NPI6	Q9NPI6	mRNA-decapping enzyme 1A	DCP1A	T				yes		GTSLPSVDLLQKLRLTPQHDQIQTQPLGKGA	17.5225	17.3707	17.2908	17.1456	17.159	17.1504	17.4774	17.7791	17.5958	3			0.999998	2.11e-07	160.69	145.44	160.69	0.63638	52256000	401	1582970	5310	149870	0	0	122170	0	0
	0.1572	0.054224	+	3.42261	1.53533	+	3.66584	1.4811	Q7Z6J0	724	Q7Z6J0	Q7Z6J0	E3 ubiquitin-protein ligase SH3RF1	SH3RF1	S						DKDSKKEKKGLLKLLSGASTKRKPRVSPPAS	16.3528	16.2338	16.5943	18.0335	18.002	17.7513	16.4494	16.3192	16.575	2			0.980479	0.0217776	73.885	8.5801	69.672	-1.0674	23499000	724	1341640	0	67647	0	0	56755	0	0
	0.870788	0.0676899	+	3.74828	-0.753986	+	3.89196	-0.821676	Q9BY89	404	Q9BY89	Q9BY89	Uncharacterized protein KIAA1671	KIAA1671	S						KAKLDPEPEKAAESPSPRLGRGLELAEVKSR	18.0843	18.1186	18.1718	17.2731	17.4389	17.4006	18.1464	18.2353	18.1959	3			0.981588	4.06e-07	153.83	140.51	153.83	0.58392	162390000	404	2269390	1374.4	219620	0	0	202280	0	0
	0.393269	-0.0703093	+	1.78067	0.438192	+	2.4873	0.508501	Q7Z6Z7	3919	Q7Z6Z7	Q7Z6Z7	E3 ubiquitin-protein ligase HUWE1	HUWE1	S			yes	yes		RESQLAHIKDEPPPLSPAPLTPATPSSLDPF	17.8211	17.7896	18.0299	18.3779	18.1587	18.4186	17.817	17.8081	17.8045	4			0.999876	7.26e-09	119.52	110.61	119.52	0.93763	1582400000	3919	2469910	3130.52	153570	13948	16110	138350	11421	12271
	0.641994	-0.0967598	+	2.01302	-0.32367	+	2.83039	-0.22691	Q96JM3	405	Q96JM3	Q96JM3	Chromosome alignment-maintaining phosphoprotein 1	CHAMP1	S						WKSGPPELRKTAPTLSPEHWKAVPPVSPELR	21.5806	21.6792	21.4523	21.2021	21.2799	21.2591	21.4593	21.4535	21.5091	3			0.999978	9.31e-09	199.13	180.46	182.89	-0.0935	2487700000	405	25766600	73548	2368100	0	0	2232000	0	0
	1.62439	0.508435	+	1.49245	-0.440697	+	3.2699	-0.949132	Q9Y6G9	405	Q9Y6G9	Q9Y6G9	Cytoplasmic dynein 1 light intermediate chain 1	DYNC1LI1	S						AAGRPVDASPRVPGGSPRTPNRSVSSNVASV	17.1317	16.7276	16.8102	16.3309	16.5141	16.5024	17.2863	17.5348	17.3737	4			0.981354	0.00282643	62.848	39.006	62.848	-0.56439	96630000	405	1184410	10134	114890	0	0	79184	0	0
	0.0100269	0.00298119	+	2.15253	-0.598494	+	2.49349	-0.601475	Q5TCZ1	406	Q5TCZ1	Q5TCZ1	SH3 and PX domain-containing protein 2A	SH3PXD2A	S						AVGVPDRTVSRLAQGSPAVARIAPQRAQISS	18.4117	18.3466	18.1312	17.8174	17.7345	17.5421	18.3565	18.3402	18.2017	2			1	2.89e-08	157.56	108.61	137.84	-0.44532	140830000	406	2566210	0	274400	0	0	235900	0	0
	1.41779	-0.106303	+	2.37167	-0.523444	+	2.0683	-0.417142	Q86VQ1	406	Q86VQ1	Q86VQ1	Glucocorticoid-induced transcript 1 protein	GLCCI1	S						DKDSGSSSPLPKYASSPKPNNSYMFKREPPE	20.6196	20.6481	20.5496	19.9154	20.1885	20.143	20.4692	20.5346	20.4946	3			0.931764	7.47e-23	257.02	228.93	257.02	-0.007314	836270000	406	12615500	23652	1231800	0	0	1113600	0	0
	0.192516	-0.0487312	+	1.67069	0.427014	+	2.51776	0.475745	Q7Z6Z7	3924	Q7Z6Z7	Q7Z6Z7	E3 ubiquitin-protein ligase HUWE1	HUWE1	T			yes			AHIKDEPPPLSPAPLTPATPSSLDPFFSREP	15.1602	14.9382	15.2529	15.5356	15.4286	15.6682	15.0156	15.0916	15.0979	4			0.997966	0.0007449	71.908	65.608	71.908	-0.34608	67966000	3924	363043	999.42	0	13948	16110	0	11421	12271
	0.0301968	0.0126095	+	1.68344	-0.606917	+	2.11623	-0.619527	Q9C0H5	407	Q9C0H5	Q9C0H5	Rho GTPase-activating protein 39	ARHGAP39	S						KEYVRQLVYVEQAGSSPKLRAGPRHKYAPNP	17.3085	17.5693	17.1412	16.639	16.9449	16.6143	17.2476	17.3376	17.4717	2			0.98737	5.51e-29	273.49	229.59	273.49	-0.44596	137960000	407	1323810	0	129570	0	0	139670	0	0
	0.341734	-0.108438	+	1.82669	-0.443393	+	1.47655	-0.334955	Q02078	408	Q02078	Q02078	Myocyte-specific enhancer factor 2A	MEF2A	S						SINTNQNISIKSEPISPPRDRMTPSGFQQQQ	16.2885	16.5171	16.1995	15.7942	15.906	15.9748	16.0614	16.2428	16.3756	3			0.922056	0.0179992	67.275	48.495	45.115	-0.23574	116460000	408	662670	2170.3	64750	0	0	68702	0	0
	1.24801	-0.158223	+	2.63731	-0.668203	+	2.28454	-0.509981	Q14432	408	Q14432	Q14432	cGMP-inhibited 3',5'-cyclic phosphodiesterase A	PDE3A	S						PRVNPVTSLSENYTCSDSEESSEKDKLAIPK	18.7154	18.5818	18.7295	17.9286	18.1763	17.9172	18.5032	18.4625	18.5864	3			0.958732	2.74e-47	273.68	244.71	190.77	0.27345	1339700000	408	3170530	7661.6	337360	0	0	276450	0	0
	0.64366	-0.134776	+	2.06242	-0.450342	+	2.11973	-0.315566	Q8WWM7	409	Q8WWM7	Q8WWM7	Ataxin-2-like protein	ATXN2L	S				yes		PGSEARGINGGPSRMSPKAQRPLRGAKTLSS	22.1557	22.2447	21.9639	21.6923	21.7346	21.5864	21.9034	22.0601	21.9965	2			0.999898	0.000450889	141.34	119.67	141.34	-1.1418	3120300000	409	36185100	36898	3501600	0	0	3268100	0	0
	0.0314078	0.0141993	+	1.81462	0.66433	+	3.19031	0.650131	Q86SQ0	384	Q86SQ0	Q86SQ0	Pleckstrin homology-like domain family B member 2	PHLDB2	S				yes		LAGESDRVFATRRNFSCGSVEFDEADLESLR	14.0374	13.6401	14.132	14.6315	14.6923	14.4788	13.9955	13.931	13.9257	2			0.997789	1.7e-05	117.26	95.06	117.26	0.27115	59108000	384	174331	683.03	14006	0	0	9873.4	0	0
	0.068594	-0.0204976	+	1.90056	-0.50641	+	1.45809	-0.485912	Q09666	41	Q09666	Q09666	Neuroblast differentiation-associated protein AHNAK	AHNAK	S				yes		AQRDDGVFVQEVTQNSPAARTGVVKEGDQIV	16.3384	16.3047	16.2699	15.6463	15.7219	16.0256	16.3945	16.0791	16.3779	2			0.999987	6.24e-22	235.7	212.24	235.7	-0.26062	145110000	41	657880	0	66983	0	0	59537	0	0
	0.133976	-0.0426439	+	2.40313	-0.772871	+	2.96244	-0.730227	Q12834	41	Q12834	Q12834	Cell division cycle protein 20 homolog	CDC20	S						ARWQRKAKEAAGPAPSPMRAANRSHSAGRTP	20.0615	20.2152	19.8455	19.3168	19.3617	19.1251	20.0415	20.0497	19.9031	2			1	7.41e-07	174.51	147.83	126.09	0.75762	656440000	41	8215750	3176.6	842740	0	0	831650	0	0
	0.939972	-0.194073	+	2.9067	0.559632	+	2.72675	0.753705	Q86SQ0	468	Q86SQ0	Q86SQ0	Pleckstrin homology-like domain family B member 2	PHLDB2	S				yes		ILSLCAEYTKPDSRLSTGTTVEDVQKINKEL	15.308	15.3501	15.4469	15.8278	15.9381	16.0179	15.2145	15.0069	15.3014	2			0.981255	0.0429014	55.261	32.035	55.261	-1.2885	20700000	468	435631	0	33236	0	0	31277	0	0
	0.186725	-0.0785554	+	1.28033	-0.526203	+	1.63709	-0.447647	Q7L1Q6	411	Q7L1Q6	Q7L1Q6	Basic leucine zipper and W2 domain-containing protein 1	BZW1	S				yes		QMKKFVEWLKNAEEESESEAEEGD_______	17.1484	17.4573	16.9264	16.5967	16.4831	16.8737	17.0835	17.1853	17.0276	2			0.816173	2.99e-09	181.77	178.92	181.77	0.38623	124970000	411	1176660	0	116200	0	0	129510	0	0
	0.0870035	-0.0475858	+	2.87015	1.73551	+	4.15052	1.7831	Q86SQ0	563	Q86SQ0	Q86SQ0	Pleckstrin homology-like domain family B member 2	PHLDB2	S						TRTPPPPSSTFPKASSESSYLSILPKTPEGI	15.4319	14.8987	15.5126	16.8605	16.9806	17.2087	15.2123	15.2828	15.2054	2			0.989739	1.43e-17	239.87	190.52	239.87	-0.21179	39826000	563	676547	261.96	36159	0	0	23070	0	0
	0.0202738	0.0122671	+	1.09144	-0.494362	+	1.79871	-0.506629	Q6UUV7	413	Q6UUV7	Q6UUV7	CREB-regulated transcription coactivator 3	CRTC3	S				yes		GPEAHQGFSRQLSSTSPLAPYPTSQMVSSDR	16.6428	16.2624	15.9978	15.7454	15.6696	16.005	16.1684	16.4178	16.3535	2			0.982632	1.6e-21	208.47	177.25	208.47	-0.53891	331380000	413	663143	0	82393	0	0	57860	0	0
	0.105521	-0.0471977	+	1.37358	0.738194	+	1.74105	0.785391	Q86TC9	124	Q86TC9	Q86TC9	Myopalladin	MYPN	S						PNLSFEPNFCQDNPRSPTSSKESPQEAKRPQ	14.3862	13.8744	14.2626	14.7202	14.7092	15.3085	14.2187	14.0618	14.1011	3			0.936837	8.44e-05	88.014	72	88.014	1.4959	61091000	124	212410	925.51	17756	0	0	11563	0	0
	1.22262	0.187554	+	2.86556	-0.764372	+	3.24035	-0.951926	Q9UHR4	414	Q9UHR4	Q9UHR4	Brain-specific angiogenesis inhibitor 1-associated protein 2-like protein 1	BAIAP2L1	S				yes		LLEENETEAVTVPTPSPTPVRSISTVNLSEN	18.4512	18.3286	18.2779	17.5663	17.7388	17.4595	18.6406	18.4816	18.4982	2			0.887445	1.47e-21	209.85	180.51	209.85	0.029418	1358600000	414	2747970	766.94	281880	0	0	233060	0	0
	0.17956	-0.0420561	+	1.5231	0.320184	+	1.36453	0.36224	Q86TC9	818	Q86TC9	Q86TC9	Myopalladin	MYPN	S						SGNQFQPRCVSPIPVSPTSRIQNPVAFLSSV	14.2455	14.2164	14.3218	14.4038	14.6298	14.7107	14.3857	14.1428	14.1291	2			0.940664	0.0213855	65.295	42.059	65.295	0.36861	64031000	818	193981	237.98	16136	0	0	14562	0	0
	0.0148343	-0.0100307	+	1.20876	-0.628151	+	2.10108	-0.61812	Q8N1F8	415	Q8N1F8	Q8N1F8	Serine/threonine-protein kinase 11-interacting protein	STK11IP	S				yes		SEPSDTDPEPRTLNPSPAGWFVQQHPELELM	15.4709	14.8605	14.7867	14.3489	14.2553	14.6294	15.0407	14.927	15.1202	3			0.998797	6.5e-29	228	209.75	228	0.23011	195000000	415	268641	0	37131	0	0	22483	0	0
	0.193243	0.0648855	+	2.05521	-0.77342	+	2.1713	-0.838306	O94804	417	O94804	O94804	Serine/threonine-protein kinase 10	STK10	S						NGLAVPVPLRKSRPVSMDARIQVAQEKQVAE	17.0424	16.7627	16.7808	16.2765	15.8281	16.161	17.0157	16.7434	17.0215	3			0.970009	0.00693608	91.62	52.746	91.62	0.18661	54475000	417	945999	2511.4	108120	0	0	81074	0	0
	0.391074	-0.12633	+	1.97203	0.554789	+	2.65664	0.681119	Q86UU0	1004	Q86UU0	Q86UU0	B-cell CLL/lymphoma 9-like protein	BCL9L	S						TGSPSRLKSPSMAVPSPGWVASPKTAMPSPG	16.6651	16.2845	16.4721	16.977	16.9709	17.1381	16.4238	16.1864	16.4324	2			0.999998	4.54e-10	183.36	160.88	183.36	-0.84615	109450000	1004	951854	0	83654	0	0	58730	0	0
	0.0467618	-0.0103334	+	2.37206	-0.624135	+	2.56106	-0.613801	Q96II8	419	Q96II8	Q96II8	Leucine-rich repeat and calponin homology domain-containing protein 3	LRCH3	S						QFMAYIEQRRISHEGSPVKPVAIREFQKTED	18.9123	18.8058	18.6878	18.2515	18.273	18.0091	18.7183	18.851	18.8057	4			0.999968	0.000159055	119.08	102.41	119.08	-0.10946	188870000	419	3622530	9394.7	385700	0	0	321530	0	0
	0.795416	-0.100374	+	2.39009	-0.34886	+	3.66936	-0.248486	Q1ED39	42	Q1ED39	Q1ED39	Lysine-rich nucleolar protein 1	KNOP1	S						TRYSVLNNDDYFADVSPLRATSPSKSVAHGQ	18.1813	18.2962	18.0998	17.8312	17.8734	17.8261	18.0928	18.0703	18.113	2			1	8.48e-22	231.42	204.09	231.42	-1.9925	771110000	42	2447830	2554.7	49145	185440	0	48224	179790	0
	0.203867	-0.0612062	+	2.03293	-0.508307	+	2.71611	-0.4471	Q5TCZ1	420	Q5TCZ1	Q5TCZ1	SH3 and PX domain-containing protein 2A	SH3PXD2A	S						GSPAVARIAPQRAQISSPNLRTRPPPRRESS	20.3799	20.3537	20.0581	19.8106	19.7561	19.7	20.2626	20.0975	20.2479	2			0.902054	1.14e-09	170.52	104.47	165.63	0.012348	281140000	420	10048500	0	1046500	0	0	913110	0	0
	1.17249	0.343611	+	1.82946	0.70402	+	1.37376	0.360409	Q86UU0	116	Q86UU0	Q86UU0	B-cell CLL/lymphoma 9-like protein	BCL9L	S						VPPFSSLKGKVKRDRSVSVDSGEQREAGTPS	13.9126	13.6393	13.4688	14.6021	14.2848	14.2458	13.9576	14.1116	13.9824	2			0.980482	0.0335101	79.652	51.369	79.652	0.34741	57728000	116	157711	747.35	12866	0	0	9867.5	0	0
	0.0710248	0.0309302	+	2.46531	-0.803227	+	2.84851	-0.834157	Q9ULJ3	422	Q9ULJ3	Q9ULJ3	Zinc finger and BTB domain-containing protein 21	ZBTB21	S						LRSFSASQSTDREGASPVTEVRIKTEPSSPL	14.8274	15.2391	15.0789	14.1518	14.3164	14.2675	14.9539	15.264	15.0203	3			0.999887	1.43e-10	172.66	147.46	172.66	0.61797	67900000	422	263596	0	23970	0	0	29020	0	0
	0.894022	-0.126568	+	2.31488	-0.344916	+	2.32871	-0.218348	Q6W2J9	423	Q6W2J9	Q6W2J9	BCL-6 corepressor	BCOR	S						GHARKTAVQDRKDGSSPPLLEKQTVTKDVTD	20.939	21.0064	20.8103	20.592	20.5962	20.5326	20.7526	20.8561	20.7672	2			0.98158	9.1e-05	157.03	113.07	157.03	-0.90597	1209500000	423	16125700	10831	1530600	0	0	1417900	0	0
	0.814252	0.171828	+	1.48768	-0.384886	+	2.64221	-0.556714	Q86V48	423	Q86V48	Q86V48	Leucine zipper protein 1	LUZP1	S						ALNNENYSLSNRQVSSPSFTNRRAAKASHMG	15.2486	15.3913	15.0685	14.905	14.9459	14.7029	15.4074	15.4579	15.3587	2			0.900077	0.00220008	107.97	73.246	107.97	0.24002	24049000	423	336040	0	31920	0	0	32159	0	0
	0.366929	0.162215	+	1.97716	-0.565289	+	1.75354	-0.727504	Q9P227	423	Q9P227	Q9P227	Rho GTPase-activating protein 23	ARHGAP23	S						LQGLDDLGYIGYRSYSPSFQRRTGLLHALSF	14.6028	14.8878	14.6708	14.3223	14.0124	14.1309	15.142	14.9257	14.5803	2			0.790567	0.0279476	76.943	51.322	76.943	1.6168	19034000	423	228342	0	20573	0	0	22900	0	0
	1.70005	-0.526274	+	1.64981	0.494521	+	2.47867	1.0208	Q86UU0	118	Q86UU0	Q86UU0	B-cell CLL/lymphoma 9-like protein	BCL9L	S						PFSSLKGKVKRDRSVSVDSGEQREAGTPSLD	18.0802	17.8365	17.866	18.3441	18.2772	18.6449	17.5292	17.1667	17.508	2			0.9991	9.67e-22	202.14	182.82	176.18	-0.3259	319010000	118	2390280	0	219010	0	0	167240	0	0
	0.421211	-0.113777	+	1.45427	0.406165	+	2.94844	0.519943	Q86UU0	25	Q86UU0	Q86UU0	B-cell CLL/lymphoma 9-like protein	BCL9L	S						LPHPRRREAPGSPPLSPRGHCPPAPAKPMHP	17.3651	17.0765	16.9853	17.4545	17.5283	17.6628	17.0052	17.0318	17.0487	3			1	4.24e-05	149.02	88.619	52.862	-0.24073	116690000	25	1443880	0	21829	112830	0	16465	83720	0
	0.0199409	-0.00765101	+	1.88465	-0.42729	+	1.93258	-0.419639	O14639	426	O14639	O14639	Actin-binding LIM protein 1	ABLIM1	S						TSGYDDKQERQSLGESPRTLSPTPSAEGYQD	17.7765	17.7296	17.4771	17.1665	17.2964	17.2384	17.5136	17.6317	17.8148	3			0.999131	3.19e-07	115.76	85.629	115.76	1.1423	227680000	426	1712800	5571.4	0	178130	0	0	155610	0
	0.899979	0.168748	+	1.63715	-0.406392	+	2.51534	-0.57514	Q16181	426	Q16181	Q16181	Septin-7	44081	T				yes		WEAQQRILEQQNSSRTLEKNKKKGKIF____	21.1005	20.946	20.8282	20.6254	20.641	20.3892	21.1682	21.0514	21.1614	3			0.999832	4.4e-14	218.14	171.39	218.14	-0.021277	4063300000	426	17810400	35603	1708400	0	0	1361300	0	0
	0.764179	-0.142833	+	2.05082	0.416046	+	4.04207	0.558879	Q86UU1	563	Q86UU1	Q86UU1	Pleckstrin homology-like domain family B member 1	PHLDB1	S						TGASPCQSPCVQRKLSSGDLRVPVTRERKNS	18.0088	18.1729	17.8862	18.3891	18.4446	18.4824	17.8354	17.8991	17.905	3			0.96762	0.0032545	81.428	58.822	81.428	0.78284	362630000	563	2643110	0	208630	0	0	209830	0	0
+	3.60427	1.47982	+	4.78888	1.86988	+	1.47056	0.390052	Q86V48	440	Q86V48	Q86V48	Leucine zipper protein 1	LUZP1	S						SFTNRRAAKASHMGVSTDSGTQETKKTEDRF	15.3054	15.3669	15.4773	17.3638	17.1737	17.2218	16.8218	17.069	16.6983	3			0.948301	8.04e-06	141.6	105.93	96.391	-0.68255	58538000	440	1021870	733.95	33177	0	0	31635	0	0
+	3.27885	1.32431	+	4.59105	3.11276	+	4.38067	1.78845	Q86V48	932	Q86V48	Q86V48	Leucine zipper protein 1	LUZP1	S						HVTVRNAWKSRRDLKSLEDPPTRIGKNVEST	16.3908	16.7384	16.3692	19.5834	19.7569	19.4965	17.7542	17.9241	17.7931	3			0.999778	0.00911358	76.82	55.262	76.82	-0.062254	69653000	932	3687030	1876.4	69415	0	0	79762	0	0
	0.283383	0.0383905	+	2.75767	-0.257388	+	2.38099	-0.295778	O15061	429	O15061	O15061	Synemin	SYNM	S						SYGKAVSSQTNVRTFSPTYGLLRNTEAQVKT	15.6483	15.5998	15.5486	15.3643	15.357	15.3033	15.7278	15.61	15.5741	2			0.970058	0.000655881	130.95	96.193	130.95	-0.067255	54887000	429	428669	0	41893	0	0	37013	0	0
	0.144638	0.0488075	+	1.86146	0.39293	+	1.66047	0.344123	Q86V81	239	Q86V81	Q86V81	THO complex subunit 4	ALYREF	S						RGRGRGAGRNSKQQLSAEELDAQLDAYNARM	15.141	15.1099	14.8621	15.4867	15.3777	15.4274	14.9254	15.2325	15.1015	2			1	4.16e-32	254.32	220.45	254.32	-0.60837	125300000	239	344006	0	29668	0	0	26600	0	0
	0.561941	-0.108739	+	1.21829	0.419147	+	1.49518	0.527886	Q86WB0	354	Q86WB0	Q86WB0	Nuclear-interacting partner of ALK	ZC3HC1	S						EQAEKSPGPIVSRTRSWDSSSPVDRPEPEAA	17.0486	17.0305	16.8654	17.1912	17.3175	17.6932	16.9976	16.7949	16.8257	3			0.966286	7.76e-22	202.56	179.51	202.56	-0.10165	583070000	354	1308540	0	32349	76233	0	36966	60154	0
	0.956149	-0.311834	+	1.50208	0.478969	+	3.80248	0.790803	Q86WR7	212	Q86WR7	Q86WR7	Proline and serine-rich protein 2	PROSER2	S						MAQKISERMAGNEALSPTSPFREGRPGEWRT	18.8376	18.5114	18.3453	19.0198	19.0095	19.102	18.2182	18.191	18.3497	2			0.988461	2.61e-06	163.9	133.56	163.9	-0.50809	248810000	212	3815000	4772	366580	0	0	263640	0	0
	1.14776	-0.323488	+	2.54245	0.682994	+	3.10063	1.00648	Q86WR7	215	Q86WR7	Q86WR7	Proline and serine-rich protein 2	PROSER2	S						KISERMAGNEALSPTSPFREGRPGEWRTPAA	17.2906	17.1126	16.9774	17.8442	17.8789	17.7066	16.9779	16.6442	16.7882	2			0.999424	3.75e-05	147.12	112.73	147.12	0.95211	99331000	215	1497190	488.71	128010	0	0	102650	0	0
	1.34532	-0.217293	+	1.33261	0.347123	+	2.31551	0.564416	Q86WR7	43	Q86WR7	Q86WR7	Proline and serine-rich protein 2	PROSER2	S				yes		RGGSLESRSSSSRSRSFTLDDESLKYLTHEE	19.4832	19.5728	19.3241	19.6529	19.7801	19.9885	19.2563	19.2027	19.2692	2			0.998437	2.57e-13	230.97	184.37	107.09	-0.1815	417680000	43	6959300	3843.6	568680	0	0	539300	0	0
	0.44254	-0.0488631	+	1.96574	-0.336044	+	1.92275	-0.287181	Q9Y4B5	43	Q9Y4B5	Q9Y4B5	Microtubule cross-linking factor 1	MTCL1	S						HLHPVAERRRLHRAPSPARPFLKDLHARPAA	19.3738	19.354	19.4884	19.1881	19.0398	18.9802	19.3605	19.3163	19.3929	3			1	0.0207999	62.924	43.137	62.924	1.0164	427310000	43	5794000	4394.7	527900	0	0	465330	0	0
	0.0142153	0.00255203	+	2.73509	-0.357244	+	2.24622	-0.359796	P35611	431	P35611	P35611	Alpha-adducin	ADD1	S						VTGYSFASDGDSGTCSPLRHSFQKQQREKTR	15.9863	16.0675	16.068	15.604	15.7095	15.7366	15.9873	15.9933	16.1488	3			0.979979	1.22e-12	142.89	135.1	142.89	0.41841	85750000	431	565728	0	52720	0	0	50735	0	0
	1.15409	-0.244247	+	1.56908	0.389898	+	2.92963	0.634146	Q86XL3	268	Q86XL3	Q86XL3	Ankyrin repeat and LEM domain-containing protein 2	ANKLE2	S						ICDYFPSPSKTSLPLSPVKTAPLFSNDRLKD	17.5206	17.2251	17.2666	17.6455	17.6758	17.8608	17.0287	17.0936	17.1573	3			0.999444	0.0025473	72.443	58.988	72.443	-0.4801	239600000	268	1606650	2861	149680	0	0	110740	0	0
	0.97149	-0.113426	+	3.3648	-0.951873	+	2.96104	-0.838448	Q8NDI1	432	Q8NDI1	Q8NDI1	EH domain-binding protein 1	EHBP1	S						NTVSAGKDLSTSPKPSPIPSPVLGRKPNASQ	17.0913	17.0626	17.1379	16.1729	16.279	15.9842	16.9094	16.9629	17.0791	3			0.999899	5.32e-05	110.26	96.843	110.26	0.49196	43851000	432	1017860	469.19	0	0	111780	0	0	99245
	1.27139	-0.460244	+	1.85434	1.00485	+	2.94781	1.4651	Q86Y91	645	Q86Y91	Q86Y91	Kinesin-like protein KIF18B	KIF18B	S						AQGSRWPMEKKRRRPSALEADSPMAPKRGTK	17.0606	16.499	16.6562	17.507	17.6427	18.0807	16.2199	16.3035	16.3116	3			1	2.74e-10	192.98	154.1	192.98	-0.21801	128020000	645	1295010	1314.9	109470	0	0	67869	0	0
	1.61845	0.540389	+	3.64013	2.07798	+	2.81945	1.53759	Q86YR5	492	Q86YR5	Q86YR5	G-protein-signaling modulator 1	GPSM1	S						DVRVHVPRTSIPRAPSSDEECFFDLLTKFQS	13.122	12.8923	13.1046	15.0397	14.9101	15.4032	13.3969	13.8404	13.5028	3			0.881987	6.75e-10	154.71	128.78	154.71	-0.17233	18866000	492	181152	0	7515.1	0	0	5962.9	0	0
	0.122695	0.0368703	+	1.23627	-0.346616	+	1.94014	-0.383486	Q66K14	435	Q66K14	Q66K14	TBC1 domain family member 9B	TBC1D9B	S						SPAPQEGSEQPASPASPLSSRQSFCAQEAPT	17.5027	17.1762	17.2035	16.8533	17.1066	16.8827	17.3939	17.2801	17.3191	3			0.969616	3.96e-42	232.16	212.66	232.16	-0.03348	659980000	435	1368990	3226.6	147870	0	0	107150	0	0
	0.340393	0.0457509	+	4.15145	-0.657842	+	4.20662	-0.703593	Q9C0C2	435	Q9C0C2	Q9C0C2	182 kDa tankyrase-1-binding protein	TNKS1BP1	S						PTSLVQRRFSEGVLQSPSQDQEKLGGSLAAL	17.4015	17.2796	17.2931	16.6677	16.6722	16.6607	17.4387	17.3725	17.3002	2			0.89151	1.21e-09	179.14	139.93	101.53	-2.4696	202430000	435	1314000	269.35	138040	0	0	114880	0	0
+	2.337	0.58155	+	2.73645	1.07021	+	1.95759	0.488663	Q86YV5	696	Q86YV5	Q86YV5	Tyrosine-protein kinase SgK223	SGK223	S						SGQNSKVGTGMSKSASFAFEFPKDRSGIETF	14.9312	15.1019	15.2746	16.3296	16.2203	15.9684	15.6852	15.6455	15.7217	3			0.8847	9.58e-05	133.47	115.02	133.47	0.40443	38749000	696	505476	0	25724	0	0	26456	0	0
+	2.00965	1.13519	+	3.13893	2.27033	+	4.06587	1.13514	Q8IVF2	1172	Q8IVF2	Q8IVF2	Protein AHNAK2	AHNAK2	S						TAKDSRFKMPKFKMPSFGASAPGKSIEASVD	15.6883	16.2276	15.4151	17.9831	18.1302	18.0286	16.8251	17.0145	16.897	3			0.999438	0.0058569	75.548	64.286	75.548	-1.4017	95487000	1172	1450740	0	43047	0	0	56519	0	0
+	4.20743	1.41456	+	5.37105	2.95627	+	5.56199	1.54171	Q8IVF2	365	Q8IVF2	Q8IVF2	Protein AHNAK2	AHNAK2	S						VGRAGVLEELGPWGDSLEETGAATGSRREER	13.3733	13.6242	13.4092	16.4864	16.4249	16.3642	14.8751	14.92	14.8553	2			0.968566	0.00117335	78.661	64.352	78.661	-0.6812	103080000	365	417164	0	8915.5	0	0	9768	0	0
+	3.60658	1.80453	+	4.22643	2.24976	+	1.92749	0.445229	Q8IVF2	842	Q8IVF2	Q8IVF2	Protein AHNAK2	AHNAK2	S						TAKDSKFKMPKFKMPSFGVSAPGKSMEDSVD	16.2324	15.9464	16.3361	18.3289	18.4341	18.5011	17.8071	18.1048	18.0166	3			0.996512	1.72e-06	168.89	137.07	168.89	-0.58175	175260000	842	2233590	9446.9	62323	0	0	46756	0	0
	0.383497	-0.0856438	+	4.1019	0.600664	+	2.67732	0.686308	Q8IVL1	1191	Q8IVL1	Q8IVL1	Neuron navigator 2	NAV2	S						PKSSALVSRSAGRKSSMDGAQNQDDGYLALS	15.4282	15.3824	15.4478	16.0496	15.9585	16.0523	15.473	15.1602	15.3681	3			0.828922	5.21e-18	205.89	187.89	205.89	1.7354	125010000	1191	466369	0	36067	0	0	31965	0	0
	0.305695	-0.0961514	+	2.1225	-0.667654	+	3.84759	-0.571503	O94804	438	O94804	O94804	Serine/threonine-protein kinase 10	STK10	S				yes		QVAQEKQVAEQGGDLSPAANRSQKASQSRPN	19.1196	19.0373	18.7016	18.2955	18.3476	18.2124	18.8711	18.8552	18.8437	2			1	3.61e-30	276.83	244.76	92.457	0.64134	981720000	438	3879220	371.68	444100	0	0	375840	0	0
	1.17579	-0.596325	+	3.05209	2.18961	+	4.49409	2.78594	Q8IVT2	156	Q8IVT2	Q8IVT2	Mitotic interactor and substrate of PLK1	MISP	S						RERWAVIQGQAVRKSSTVATLQGTPDHGDPR	18.5539	17.7846	18.2327	20.2453	20.3082	20.5864	17.6291	17.4338	17.7192	3			0.909607	2.96e-32	250.82	203.86	250.82	0.023664	503710000	156	6114590	0	302260	0	0	161490	0	0
	0.423768	-0.086434	+	1.37764	0.425669	+	1.58634	0.512103	Q8IVT2	284	Q8IVT2	Q8IVT2	Mitotic interactor and substrate of PLK1	MISP	S						SVQVVDDPGSLASVESPGTPKETPIEREIRL	15.9718	15.7765	15.8906	16.0947	16.2709	16.5503	15.7352	15.7194	15.9251	3			0.990735	1.13e-23	198.21	183.63	198.21	0.35144	55510000	284	612213	0	52202	0	0	41696	0	0
	1.82437	0.257184	+	1.94353	-0.317219	+	2.9669	-0.574404	O94887	439	O94887	O94887	FERM, RhoGEF and pleckstrin domain-containing protein 2	FARP2	S						DSSSSLTDPQVSYVKSPAAERRSGAVAGGPD	18.5385	18.5359	18.3958	18.2804	18.1217	18.1164	18.7814	18.6644	18.796	4			0.994565	1.47e-13	158.2	140.14	158.2	0.098972	273440000	439	3367150	14919	299110	0	0	268020	0	0
	0.445223	0.163797	+	2.02944	1.02877	+	1.78453	0.864971	Q8IVT2	287	Q8IVT2	Q8IVT2	Mitotic interactor and substrate of PLK1	MISP	T						VVDDPGSLASVESPGTPKETPIEREIRLAQE	14.2635	13.9797	13.8861	14.8265	14.949	15.4401	13.9961	14.2571	14.3675	3			0.878019	9.45e-07	106.19	98.871	106.19	-0.15226	90642000	287	221948	0	16334	0	0	12414	0	0
	1.12898	-0.507576	+	2.59889	1.57203	+	3.73005	2.07961	Q8IVT2	395	Q8IVT2	Q8IVT2	Mitotic interactor and substrate of PLK1	MISP	S						WVSEGPQPGLRRALSSDSILSPAPDARAADP	17.1292	16.5303	16.5726	18.1126	18.2757	18.5599	16.3669	16.0731	16.2693	2			0.97679	2.63e-125	435.41	379.18	241.76	0.20724	3726200000	395	1646890	0	114700	0	0	69317	0	0
+	1.654	-0.671635	+	3.69654	2.3489	+	5.03754	3.02053	Q8IVT2	471	Q8IVT2	Q8IVT2	Mitotic interactor and substrate of PLK1	MISP	S						KAATSPKATMSPRHLSESSGKPLSTKQEASK	18.0485	17.5625	18.075	20.3468	20.1119	20.2741	17.383	17.1221	17.1661	3			0.999152	0.000744575	99.566	74.631	99.566	-0.023661	590410000	471	5334860	0	214340	0	0	139040	0	0
	0.0834723	-0.0463247	+	3.20305	1.79714	+	3.44649	1.84347	Q8IVT2	541	Q8IVT2	Q8IVT2	Mitotic interactor and substrate of PLK1	MISP	S						WGWEVAGAPALRLQKSQSSDLLERERESVLR	15.8663	15.4154	15.8725	17.3687	17.4555	17.7214	15.9218	15.5361	15.5572	3			0.998095	0.000395701	113.88	87.447	113.88	-1.3302	84911000	541	946068	1442	48586	0	0	32684	0	0
+	3.99859	1.02354	+	3.92621	1.69158	+	2.48118	0.668039	Q8IWB9	196	Q8IWB9	Q8IWB9	Testis-expressed sequence 2 protein	TEX2	S				yes		TLSSAKPFMSLVKSLSTEVEPKESPHPARHR	17.1162	17.3042	17.2153	18.9382	19.0563	18.7159	18.2447	18.1666	18.2949	2			0.960653	4.2e-06	211.64	130.3	171.92	0.62632	187270000	196	3037670	1216.9	113690	0	0	116810	0	0
	0.2069	0.0656522	+	1.19054	-0.346773	+	1.78328	-0.412425	Q5T5U3	442	Q5T5U3	Q5T5U3	Rho GTPase-activating protein 21	ARHGAP21	S						VVPNRTTLQGRRRSTSHDRVPQSVQIRQRSV	15.7843	15.6611	15.4189	15.4289	15.1355	15.2598	15.7146	15.5732	15.7737	3			0.822005	0.00665394	72.446	55.368	72.446	0.22096	107470000	442	430474	0	45955	0	0	38575	0	0
	1.67489	-0.0843754	+	3.36523	-0.4433	+	2.92257	-0.358925	Q8WWL2	442	Q8WWL2	Q8WWL2	Protein spire homolog 2	SPIRE2	S						ESPCGEVTLKRDRSFSEHDLAQLRSEVASGL	17.8952	17.8989	17.9355	17.5378	17.4599	17.402	17.795	17.8603	17.8212	3			0.890506	6.8e-05	140.35	111.77	77.912	-0.17339	222290000	442	1981990	1078.3	193120	0	0	174430	0	0
	0.312546	0.0280215	+	3.27805	-0.308983	+	3.54076	-0.337004	Q9BRZ2	442	Q9BRZ2	Q9BRZ2	E3 ubiquitin-protein ligase TRIM56	TRIM56	T				yes		TREEGAQTLEEDRAQTPHEDGGPQPHRGGRP	19.0599	19.0625	18.9802	18.7509	18.7031	18.7216	19.0179	19.1034	19.0654	5			1	2.03e-61	293.81	268.16	293.81	0.22206	656260000	442	4591300	4836.1	426410	0	0	382280	0	0
	0.73543	-0.164337	+	3.56109	1.07315	+	3.75093	1.23749	Q8IWC1	524	Q8IWC1	Q8IWC1	MAP7 domain-containing protein 3	MAP7D3	S						SPISTNRQIQKNCPPSPLPLISKQSPQTSFP	17.5865	17.5102	17.347	18.5664	18.4544	18.6424	17.3584	17.1728	17.4194	2			0.999802	2.12e-06	169.92	89.612	123.97	0.14267	225150000	524	2287800	0	156540	0	0	134220	0	0
	0.972563	0.182383	+	4.031	0.900627	+	3.3142	0.718244	Q8IWE2	261	Q8IWE2	Q8IWE2	Protein NOXP20	FAM114A1	S						DPGFKRTKTLMERTVSLSQMLREAKEKEKQR	13.9991	13.8102	13.8726	14.7889	14.8181	14.7768	14.1759	13.9462	14.1069	2			0.971714	0.00141085	130.44	90.084	58.132	1.4012	22750000	261	188361	0	13646	0	0	11073	0	0
	0.383364	-0.0929451	+	1.64487	-0.360171	+	2.25056	-0.267226	Q9H7P9	445	Q9H7P9	Q9H7P9	Pleckstrin homology domain-containing family G member 2	PLEKHG2	T						SLHCAPKSKPVLEPLTPPLGSPRPRDARSFT	18.2947	18.606	18.5403	18.1831	18.082	18.0954	18.3291	18.4581	18.3749	4			0.999999	1.59e-05	114.15	102.71	114.15	0.26233	115090000	445	3000000	6022.52	172390	81014	0	214420	66582	0
	0.208279	0.069952	+	4.7443	1.32871	+	3.35754	1.25876	Q8IX03	535	Q8IX03	Q8IX03	Protein KIBRA	WWC1	S			yes			ALRSLSGTPKSMTSLSPRSSLSSPSPPCSPL	15.7336	15.588	15.7667	17.0387	17.0109	17.0247	15.6541	16.0016	15.6423	2			0.978307	0.0492279	60.899	19.905	60.899	-1.0029	25754000	535	760442	0	44395	0	0	36719	0	0
	0.104765	0.0326112	+	1.77447	-0.472753	+	2.97097	-0.505364	Q3KQU3	446	Q3KQU3	Q3KQU3	MAP7 domain-containing protein 1	MAP7D1	S				yes		LARERSLKKRQSLPASPRARLSASTASELSP	18.2858	18.209	17.9303	17.5682	17.7008	17.738	18.1177	18.2209	18.1844	2			0.999997	0.0128881	94.402	68.781	94.402	0.24801	238840000	446	2388010	0	251880	0	0	215000	0	0
	0.452157	0.12773	+	1.94674	1.16901	+	1.88025	1.04128	Q8IXK0	751	Q8IXK0	Q8IXK0	Polyhomeotic-like protein 2	PHC2	S						DSSRCSDNSSYEEPLSPISASSSTSRRRQGQ	13.4569	13.0988	13.1703	14.1743	14.1692	14.8895	13.2683	13.4483	13.3926	2			0.905697	0.0523835	42.711	30.085	42.711	0.80638	50771000	751	134261	0	9437.3	0	0	6853.9	0	0
	0.0913606	0.0135676	+	2.50076	-0.474387	+	2.58163	-0.487954	P23443	447	P23443	P23443	Ribosomal protein S6 kinase beta-1	RPS6KB1	S				yes		IRSPRRFIGSPRTPVSPVKFSPGDFWGRGAS	20.3424	20.4214	20.287	19.7863	19.9993	19.842	20.3155	20.4337	20.3423	3			0.997845	6.54e-11	196.98	181.5	196.98	0.061332	902310000	447	11014300	19826.5	834450	185680	0	834550	121180	0
	1.00266	-0.124619	+	2.19989	0.461771	+	2.81445	0.58639	Q8IXZ2	383	Q8IXZ2	Q8IXZ2	Zinc finger CCCH domain-containing protein 3	ZC3H3	S						SKPGSAPSKYKWKASSPSASSSSSFRWQSEA	15.1497	15.0347	15.211	15.5683	15.4848	15.7277	15.0612	14.9797	14.9808	2			0.964814	3.4e-06	167.03	104.94	167.03	-0.86823	46777000	383	363615	217.8	29845	0	0	25285	0	0
	1.10479	-0.242129	+	2.12769	0.705489	+	2.72325	0.947618	Q8IY63	322	Q8IY63	Q8IY63	Angiomotin-like protein 1	AMOTL1	S						RGPPPEYPFKTKQMMSPVSKTQEHGLFYGDQ	15.2937	15.2352	15.023	15.7742	15.7759	16.1182	15.0245	14.8203	14.9807	2			0.999149	0.0228855	80.979	45.755	80.979	0.07074	26061000	322	400376	0	32915	0	0	28944	0	0
	0.363443	-0.065637	+	2.3065	0.463878	+	3.01867	0.529515	Q8IY67	463	Q8IY67	Q8IY67	Ribonucleoprotein PTB-binding 1	RAVER1	T				yes		GDREALGLGPPAAQLTPPPAPVGLRGSGLRG	15.8344	15.6947	15.9226	16.19	16.2944	16.3588	15.8227	15.7232	15.7088	2			1	2.95e-09	136.49	113.77	136.49	-0.078885	541640000	463	592345	0	47545	0	0	39457	0	0
+	2.98403	0.90857	+	4.41297	2.20854	+	4.26032	1.29997	Q8IZ21	131	Q8IZ21	Q8IZ21	Phosphatase and actin regulator 4	PHACTR4	S			yes			SSSPVQVEEEPVRLASLRKAIPEEDLKKRLG	13.8907	13.5848	13.6201	15.8499	15.852	16.0193	14.6925	14.5403	14.5885	4			1	9.77e-06	122.5	112.1	122.5	0.40842	88745000	131	319170	0	6017.8	6658.3	0	4808.4	4703.1	0
	0.143933	-0.0613969	+	1.8504	-0.611354	+	2.64955	-0.549957	Q99741	45	Q99741	Q99741	Cell division control protein 6 homolog	CDC6	S						SDAKLEPTNVQTVTCSPRVKALPLSPRKRLG	14.9845	14.6861	14.4963	14.0781	14.185	14.0698	14.6653	14.7795	14.5379	2			0.9991	0.000202738	109.48	71.457	109.48	2.1795	35253000	45	211304	0	26674	0	0	19989	0	0
	0.085669	-0.0177212	+	1.65299	-0.353892	+	2.10095	-0.336171	O94804	450	O94804	O94804	Serine/threonine-protein kinase 10	STK10	S						GDLSPAANRSQKASQSRPNSSALETLGGEKL	17.3476	17.1105	17.2917	16.8894	17.0142	16.7846	17.2398	17.2012	17.2557	3			0.972991	1.39e-09	165.48	139.04	165.48	-1.4909	39340000	450	1306970	4168.1	0	133070	0	0	102510	0
	0.676857	0.396431	+	2.67561	1.23395	+	1.53865	0.837519	Q8IZ21	427	Q8IZ21	Q8IZ21	Phosphatase and actin regulator 4	PHACTR4	S			yes			LPPLPLHIRIQQALTSPLPMTPILEGSHRAH	11.6465	11.5836	11.204	12.7027	12.5324	12.9009	12.3163	11.5608	11.7463	3			0.777055	0.043779	47.331	38.235	47.331	1.5539	9035400	427	41831.8	0	0	2755	0	0	2467.2	0
	0.444475	-0.130649	+	1.47788	-0.424723	+	1.66753	-0.294074	Q969V6	450	Q969V6	Q969V6	MKL/myocardin-like protein 1	MKL1	T						TVASSGVVKFGSTGSTPPVSPTPSERSLLST	15.1598	15.5246	15.4933	14.9715	14.855	15.0772	15.3079	15.3124	15.1656	2			0.865212	0.0326394	65.467	49.526	65.467	3.0047	31963000	450	344365	0	30050	0	0	35183	0	0
+	2.23838	0.665835	+	3.08849	1.72615	+	2.05102	1.06032	Q8IZP0	319	Q8IZP0	Q8IZP0	Abl interactor 1	ABI1	S						GSAPGSQYGTMTRQISRHNSTTSSTSSGGYR	14.9629	14.9141	15.0206	16.8541	16.3179	16.9041	15.8565	15.5916	15.4469	3			0.987987	0.0335548	46.839	33.802	46.839	0.55575	60082000	319	609479	1384.2	0	26284	0	0	23311	0
	0.212955	-0.0524197	+	2.12987	-0.526495	+	2.90448	-0.474075	Q9H7P9	450	Q9H7P9	Q9H7P9	Pleckstrin homology domain-containing family G member 2	PLEKHG2	S						PKSKPVLEPLTPPLGSPRPRDARSFTPGRRN	16.618	16.4705	16.3012	15.9672	15.8364	16.0067	16.4362	16.356	16.4403	4			0.999978	0.0396241	55.67	43.817	55.67	-0.25782	28693000	450	720584	444.52	0	81014	0	0	66582	0
	0.172563	0.081171	+	2.02601	-0.852851	+	2.54878	-0.934022	P23443	452	P23443	P23443	Ribosomal protein S6 kinase beta-1	RPS6KB1	S						RFIGSPRTPVSPVKFSPGDFWGRGASASTAN	17.8375	17.3587	17.4306	16.4804	16.7903	16.7976	17.5371	17.5155	17.8177	3			0.999998	0.000460749	99.078	78.073	99.078	0.89294	55676000	452	1506110	3022.5	0	185680	0	0	121180	0
	0.5657	-0.0648791	+	3.52187	0.609194	+	6.36923	0.674074	Q8N3D4	1257	Q8N3D4	Q8N3D4	EH domain-binding protein 1-like protein 1	EHBP1L1	S						GAGAPGGGGVRLRRPSVNGEPGSVPPPRAHG	17.5443	17.4305	17.3711	18.0425	18.0777	18.0532	17.3907	17.382	17.3785	4			1	7.99e-06	129.77	87.054	129.77	1.5517	120270000	1257	1923460	5112.9	152110	0	0	127190	0	0
	0.00325759	-0.000523249	+	2.3559	-0.327176	+	2.20163	-0.326653	Q14157	454	Q14157	Q14157	Ubiquitin-associated protein 2-like	UBAP2L	S						SPAVATSTAAPPPPSSPLPSKSTSAPQMSPG	21.0387	21.0681	20.9602	20.6034	20.7298	20.7523	21.0808	20.9418	21.0428	2			0.78358	1.15e-37	270.08	239.53	163.44	0.87437	6678800000	454	18069000	9851.1	1638100	0	0	1478200	0	0
	1.31851	-0.454986	+	3.27656	2.05932	+	4.1052	2.51431	Q8N3F8	309	Q8N3F8	Q8N3F8	MICAL-like protein 1	MICALL1	S						ASPPAGRPTPAPRKASESTTPAPPTPRPRSS	15.5702	15.1969	15.0773	17.1926	17.2131	17.6167	14.8788	14.9012	14.6995	4			0.997063	3.81e-05	114.75	96.359	114.75	-3.2993	54236000	309	760510	0	39726	0	0	28208	0	0
+	2.53646	0.426733	+	5.15874	1.86534	+	5.49975	1.4386	Q8N3V7	263	Q8N3V7	Q8N3V7	Synaptopodin	SYNPO	S			yes			YSEEASLLRHLEKVASEEEEVPLVVYLKENA	15.5274	15.5376	15.3607	17.312	17.3268	17.3831	15.8431	15.954	15.9089	2			1	6.92e-07	167.98	148.24	167.98	-0.077215	95663000	263	868066	622.43	38586	0	0	35493	0	0
	1.14549	-0.61453	+	2.00525	0.973841	+	3.38586	1.58837	Q8N573	201	Q8N573	Q8N573	Oxidation resistance protein 1	OXR1	S						TPSSTFTGIRPARVVSSTSEEEEAFTEKFLK	14.9469	14.2889	14.8726	15.7149	15.7053	15.6097	14.1955	13.8057	14.2636	2			0.988244	2.36e-14	204.43	178.71	204.43	0.83919	61094000	201	299327	0	25999	0	0	15291	0	0
	0.143355	0.0636381	+	1.71963	-0.638196	+	3.75774	-0.701834	Q7KZI7	456	Q7KZI7	Q7KZI7	Serine/threonine-protein kinase MARK2	MARK2	S				yes		RESGRKASSTAKVPASPLPGLERKKTTPTPS	17.8321	17.6276	17.2768	16.8932	16.9014	17.0272	17.6976	17.6007	17.6291	2			1	5.3e-08	191.23	149.07	191.23	0.11897	330510000	456	1580920	0	185000	0	0	145270	0	0
	0.433256	-0.0985654	+	2.57476	0.636883	+	3.67128	0.735449	Q8N573	91	Q8N573	Q8N573	Oxidation resistance protein 1	OXR1	S						TGQKKTLDKKDGRRMSFQKPKGTIEYTVESR	17.9713	18.0779	17.7782	18.5957	18.5057	18.6366	17.9256	17.7837	17.8224	4			1	0.00378755	109.6	76.374	109.6	0.0069564	164560000	91	2724760	11767	203380	0	0	196800	0	0
	1.61105	0.596256	+	3.50445	1.74838	+	3.43395	1.15212	Q8N5C8	126	Q8N5C8	Q8N5C8	TGF-beta-activated kinase 1 and MAP3K7-binding protein 3	TAB3	S						HAAGKQLICLVQEPHSAPAVVAATPNYNPFF	13.0435	12.7258	12.557	14.4307	14.5895	14.5513	13.4514	13.189	13.4747	3			0.999714	0.000710423	71.359	62.446	71.359	0.59191	40662000	126	129750	0	7124.3	0	0	5330.1	0	0
	0.118905	0.0258624	+	3.94736	-1.2038	+	6.00705	-1.22966	O14639	458	O14639	O14639	Actin-binding LIM protein 1	ABLIM1	S						RDRMIHRSTSQGSINSPVYSRHSYTPTTSRS	17.9006	17.7657	17.6318	16.58	16.5821	16.5245	17.821	17.7657	17.7889	2			0.999934	1.29e-22	256.28	217.25	256.28	0.27601	283750000	458	1622020	0	193830	0	0	159450	0	0
	2.25194	0.380945	+	3.89534	1.97381	+	3.63455	1.59287	Q8N5S9	52	Q8N5S9	Q8N5S9	Calcium/calmodulin-dependent protein kinase kinase 1	CAMKK1	S						PTRNGVDPPPRARAASVIPGSTSRLLPARPS	15.3406	15.5285	15.3625	17.6014	17.3694	17.1822	15.817	15.7176	15.8399	2			1	3.12e-06	161.25	120.76	161.25	0.31973	80890000	52	861634	0	33982	0	0	35276	0	0
	1.24359	0.222506	+	1.84197	-0.277423	+	3.02046	-0.499929	Q86UU1	461	Q86UU1	Q86UU1	Pleckstrin homology-like domain family B member 1	PHLDB1	S						LGRRGLDSMRELPPLSPSLSRRALSPLPTRT	16.4552	16.3465	16.2326	16.0431	16.0541	16.1049	16.6109	16.4597	16.6313	2			0.943419	3.62e-10	221.09	142.02	221.09	-0.35995	202980000	461	755338	0	72528	0	0	61237	0	0
	0.501186	-0.0930271	+	2.54087	-0.485422	+	2.32111	-0.392395	Q15149	4613	Q15149	Q15149	Plectin	PLEC	S				yes		LRLLEAAAQSTKGYYSPYSVSGSGSTAGSRT	18.1908	18.1104	17.9825	17.673	17.5262	17.6282	17.9506	18.1092	17.9448	2			0.996981	9.85e-24	226.22	202.17	226.22	-0.95973	619450000	4613	2225790	0	184900	51204	0	143190	57992	0
	0.0172371	0.00388654	+	4.59252	-1.62182	+	4.16897	-1.6257	Q14C86	462	Q14C86	Q14C86	GTPase-activating protein and VPS9 domain-containing protein 1	GAPVD1	T						AKPGKSSSLEMTPYNTPQLSPATTPANKKNR	16.5772	16.4982	16.4691	14.999	14.9096	14.7705	16.484	16.6491	16.423	3			0.999579	1.19e-10	139.16	121.37	139.16	-0.28745	67828000	462	644293	549.76	0	78802	0	0	67831	0
	0.265886	-0.0663236	+	2.49922	1.19883	+	2.47149	1.26516	Q8N6T3	361	Q8N6T3	Q8N6T3	ADP-ribosylation factor GTPase-activating protein 1	ARFGAP1	S						SDSWTCADTSTERRSSDSWEVWGSASTNRNS	16.4142	16.2832	16.2637	17.4798	17.2236	17.8541	16.3476	16.0787	16.3358	3			0.76773	9.57e-37	292.78	257.87	292.78	-0.18986	144410000	361	1108740	0	70527	0	0	58677	0	0
	0.481247	-0.0802819	+	3.68896	0.934013	+	3.24352	1.01429	Q8N961	67	Q8N961	Q8N961	Ankyrin repeat and BTB/POZ domain-containing protein 2	ABTB2	S						AAWWCYSGSMNSRHNSWDTVNTVLPEDPEVA	13.8951	13.8841	13.906	14.7991	14.7224	14.9657	13.71	13.9533	13.7811	3			0.990828	1.2e-07	125.06	115.3	125.06	0.21433	30196000	67	182056	0	12714	0	0	11639	0	0
	0.458971	0.199059	+	2.34367	-0.739294	+	1.99653	-0.938353	Q86X29	464	Q86X29	Q86X29	Lipolysis-stimulated lipoprotein receptor	LSR	S				yes		GPALTPIRDEEWGGHSPRSPRGWDQEPAREQ	17.9154	17.8694	17.6858	17.1312	17.2429	16.8786	18.2248	17.6771	18.1658	4			1	7.04e-13	194.68	166	194.68	0.70437	120400000	464	1937510	10177	195780	0	0	170990	0	0
	0.305707	-0.0433776	+	3.46651	-0.685887	+	4.78405	-0.642509	Q9BUH8	465	Q9BUH8	Q9BUH8	Brain-enriched guanylate kinase-associated protein	BEGAIN	S				yes		GGAGGSPGKKADGRASPLYASYKADSFSEGD	19.4672	19.4457	19.2892	18.7039	18.7576	18.683	19.3601	19.38	19.332	3			1	1.96e-05	151.31	127.91	151.31	0.24759	558580000	465	5374540	12730	562560	0	0	495020	0	0
	0.864147	-0.0882543	+	2.55582	-0.562791	+	2.4127	-0.474537	Q14C86	466	Q14C86	Q14C86	GTPase-activating protein and VPS9 domain-containing protein 1	GAPVD1	S				yes		KSSSLEMTPYNTPQLSPATTPANKKNRLPIA	19.9853	19.8595	19.8654	19.395	19.4349	19.1918	19.8191	19.8546	19.7716	3			0.999939	5.43e-29	227.59	209.29	227.59	-0.10005	1249600000	466	7691480	948.91	721320	78802	0	586490	67831	0
	1.2102	0.516265	+	3.5052	2.42078	+	5.08481	1.90452	Q8NC51	330	Q8NC51	Q8NC51	Plasminogen activator inhibitor 1 RNA-binding protein	SERBP1	S						ADGQWKKGFVLHKSKSEEAHAEDSVMDHHFR	21.0699	21.5699	20.9086	23.6301	23.4874	23.6932	21.7268	21.7184	21.652	3			0.994543	1.74e-51	296.49	275.68	261.45	0.239	6278900000	330	61451700	42841	1673200	0	0	2073300	0	0
	1.12978	0.270104	+	2.89373	-0.431365	+	2.40136	-0.701469	P27448	469	P27448	P27448	MAP/microtubule affinity-regulating kinase 3	MARK3	S						KSSGSAVGGKGIAPASPMLGNASNPNKADIP	16.6576	16.6245	16.7227	16.3192	16.2272	16.1643	16.7219	17.0639	17.0293	3			1	2.21e-17	189.12	165.51	189.12	-1.0089	108170000	469	932058	0	83223	0	0	73865	0	0
	0.0896404	0.0141385	+	2.66714	-0.379356	+	4.20662	-0.393494	Q96BT3	47	Q96BT3	Q96BT3	Centromere protein T	CENPT	S						RSARAGARRALLETASPRKLSGQTRTIARGR	18.4636	18.3233	18.2923	17.9627	17.9766	18.0018	18.3774	18.4054	18.3388	2			1	0.000309231	167.2	100.63	167.2	-0.19869	334370000	47	2821380	1386.3	284240	0	0	232230	0	0
	1.21437	-0.270112	+	4.79074	1.9011	+	4.49737	2.17121	Q8ND04	742	Q8ND04	Q8ND04	Protein SMG8	SMG8	S						EVKTEKRPNFVDRQASTVEYLPGMLHSNCPK	16.5606	16.3721	16.4551	18.2987	18.4724	18.3199	16.0482	16.3554	16.1738	3			0.967164	3.64e-32	250.71	232.41	250.71	0.17897	116150000	742	1602800	3540.5	77914	0	0	62301	0	0
	0.668138	0.101102	+	2.19739	-0.28003	+	2.79458	-0.381131	Q9Y534	47	Q9Y534	Q9Y534	Cold shock domain-containing protein C2	CSDC2	S						SRVWERGGVPPRDLPSPLPTKRTRTYSATAR	16.1866	16.1695	16.0279	15.8212	15.8826	15.8401	16.1702	16.1958	16.3214	3			0.998548	0.00459651	92.925	66.801	92.925	-0.35137	44507000	47	627916	1671.1	60415	0	0	54347	0	0
	0.403474	0.0762316	+	1.9866	-0.323159	+	3.1073	-0.399391	O43663	470	O43663	O43663	Protein regulator of cytokinesis 1	PRC1	T						KKQTETEMLYGSAPRTPSKRRGLAPNTPGKA	20.2663	20.2605	20.0563	19.852	19.8592	19.9025	20.1976	20.3376	20.2766	4			0.997518	2.05e-18	222.69	193.63	222.69	-0.20337	1076700000	470	10409900	40955	968740	0	0	857430	0	0
	0.076306	-0.0209401	+	1.94017	-0.598771	+	2.21906	-0.577831	Q9NV70	470	Q9NV70	Q9NV70	Exocyst complex component 1	EXOC1	S						QETESLHGSSGKLTGSTSSLNKLSVQSSGNR	18.9538	18.6757	18.9293	18.3851	18.3243	18.053	18.7949	18.9072	18.7939	3			0.957918	8.08e-07	205.02	121.53	86.18	-0.36062	172720000	470	3776280	6943.7	85714	311030	0	75189	219330	0
	0.501985	0.317866	+	1.49466	0.755078	+	1.35899	0.437212	Q8ND25	123	Q8ND25	Q8ND25	E3 ubiquitin-protein ligase ZNRF1	ZNRF1	S						GGHHRDGMLYLGSRASLADALPLHIAPRWFS	11.6313	12.3983	12.234	12.81	12.8447	12.8741	12.6585	12.4167	12.142	3			1	0.0465359	41.088	27.182	41.088	2.1567	0	123	53134	0	2726.7	0	0	4273.4	0	0
	0.603846	0.339194	+	2.85521	2.05138	+	4.49537	1.71219	Q8ND30	329	Q8ND30	Q8ND30	Liprin-beta-2	PPFIBP2	S						KEIVMVTQGPSERTLSINEEEPEGGFSKWNA	15.0114	14.1629	14.7233	16.5438	16.7103	16.7978	14.9342	14.9381	15.043	2			0.999483	8.68e-07	165.45	127.9	165.45	0.0080021	69722000	329	523194	0	27165	0	0	14046	0	0
	1.1338	-0.154011	+	2.90859	0.673353	+	3.21121	0.827363	Q8ND82	80	Q8ND82	Q8ND82	Zinc finger protein 280C	ZNF280C	S						GHSSSSSKGIKSEPHSPGIPEIFRTASQRCR	15.2906	15.1849	15.1458	15.837	15.7862	16.0182	15.0766	14.9625	15.1202	3			0.999992	0.00016044	123.76	102.51	123.76	0.28613	24490000	80	408248	843.88	32846	0	0	27980	0	0
	0.693229	0.257218	+	2.34922	0.954719	+	1.86477	0.697501	Q8NDD1	73	Q8NDD1	Q8NDD1	Uncharacterized protein C1orf131	C1orf131	S						KKRDVMASAALAAEPSPLPGSLIRGQRKSAS	11.6861	11.4685	11.881	12.5401	12.4982	12.8615	11.9819	12.1164	11.709	2			0.992231	0.000895728	73.11	54.972	73.11	-1.5125	0	73	42268.9	0	2830	0	0	2283	0	0
	0.546846	0.102059	+	2.07303	-0.387783	+	3.79867	-0.489842	Q8TEH3	473	Q8TEH3	Q8TEH3	DENN domain-containing protein 1A	DENND1A	S						GCAPTPEEQLPKTAPSPLVEAKDPKLREDRR	16.4474	16.2026	16.42	15.9844	15.995	15.9272	16.5139	16.4437	16.4185	2			0.99986	0.000124417	153.54	104.18	153.54	0.36507	35548000	473	720278	0	72140	0	0	55575	0	0
+	1.38384	0.969582	+	3.57949	2.9207	+	2.9114	1.95111	Q8NE71	166	Q8NE71	Q8NE71	ATP-binding cassette sub-family F member 1	ABCF1	S						PKPAKPEKNRINKAVSEEQQPALKGKKGKEE	15.3485	16.1032	15.4876	18.6919	18.4852	18.5243	17.0769	16.379	16.3921	2			1	5.79e-08	190.27	153.88	171.36	-0.52981	202190000	166	1767170	0	34165	0	0	51972	0	0
	0.371323	0.0333042	+	2.76659	-0.343311	+	3.27056	-0.376616	Q8WWL2	476	Q8WWL2	Q8WWL2	Protein spire homolog 2	SPIRE2	S						THPPGGTEPPRPRAGSAHVWRPGSRDQGTCP	16.4391	16.5198	16.5481	16.2147	16.1594	16.1029	16.5016	16.5653	16.54	4			0.999997	0.015966	71.531	50.691	71.531	1.8336	39688000	476	787418	438	71729	0	0	68830	0	0
+	3.39193	1.76797	+	4.65853	2.6169	+	2.5112	0.848929	Q8NEY1	377	Q8NEY1	Q8NEY1	Neuron navigator 1	NAV1	S						SPSKLSHISRLELVESLDSDEVDLKSGYMSD	13.1525	13.4684	13.4651	16.0128	16.0379	15.886	14.947	15.3672	15.0758	2			0.999318	7.77e-05	118.13	88.439	118.13	-0.26531	35024000	377	357341	456.21	7672.5	0	0	8793.9	0	0
	0.584108	-0.85783	+	1.26786	-1.5898	+	1.04658	-0.731968	P12956	477	P12956	P12956	X-ray repair cross-complementing protein 6	XRCC6	S						MKAIVEKLRFTYRSDSFENPVLQQHFRNLEA	18.0462	19.7825	18.0528	16.8302	17.2126	17.0694	17.4532	18.3874	17.4675	3			0.885855	8.67e-15	221.85	204.6	221.85	0.26271	167200000	477	2326780	2380.3	214000	0	0	621210	0	0
	0.512443	0.101041	+	1.60982	0.421914	+	1.40621	0.320873	Q8NEY1	452	Q8NEY1	Q8NEY1	Neuron navigator 1	NAV1	S				yes		SLNSLPSTPTASRRNSTIVLRTDSEKRSLAE	16.0632	16.3145	16.203	16.7909	16.4623	16.5932	16.2846	16.3801	16.2191	3			0.981923	0.000502475	172.61	110.96	172.61	-0.29509	120240000	452	786722	1076.2	55549	0	0	59930	0	0
	2.49173	0.326096	+	5.50905	1.84434	+	5.48945	1.51824	Q8NEY1	648	Q8NEY1	Q8NEY1	Neuron navigator 1	NAV1	S						KSSGIPVKPVNGRKTSLDVSNSAEPGFLAPG	16.2241	16.1366	16.0821	17.9509	17.9816	18.0433	16.5332	16.429	16.4589	3			0.813701	1.1e-18	220.52	201.99	220.52	-0.77326	177900000	648	1352660	0	61974	0	0	53156	0	0
	0.245166	-0.0851644	+	3.24583	-0.691738	+	1.92596	-0.606574	Q9P270	48	Q9P270	Q9P270	SLAIN motif-containing protein 2	SLAIN2	S						SRSGAVQGAGSLGPGSPVRAGASIPSSGAAS	16.9113	16.749	16.8519	16.2464	16.086	16.1047	16.9739	16.7552	16.5277	2			1	6.77e-29	254.24	207.26	254.24	1.0624	210870000	48	900205	0	98899	0	0	80333	0	0
	0.680497	0.059049	+	2.39673	-0.227751	+	4.28276	-0.2868	Q92945	480	Q92945	Q92945	Far upstream element-binding protein 2	KHSRP	S						PPNGDPNFKLFIIRGSPQQIDHAKQLIEEKI	18.2264	18.1012	18.1909	17.9628	17.9361	17.9364	18.2565	18.2128	18.2263	3			1	6.92e-10	180.52	132.61	180.52	-0.63771	373070000	480	2596610	1322.7	241910	0	0	199930	0	0
	0.688889	-0.246977	+	1.81876	1.23464	+	2.33889	1.48162	Q8NFC6	635	Q8NFC6	Q8NFC6	Biorientation of chromosomes in cell division protein 1-like 1	BOD1L1	S						HVHAKSEPSKPARRLSESLHVVDENKNESKL	18.5606	18.0615	18.5253	19.585	19.1891	20.0773	18.1871	18.0921	18.1274	4			0.999266	6.86e-22	228.71	210.84	228.71	0.38454	491860000	635	4695430	5982.3	303640	0	0	194650	0	0
	0.022667	0.00559171	+	2.24459	-0.436225	+	2.42586	-0.441816	O43663	481	O43663	O43663	Protein regulator of cytokinesis 1	PRC1	T						SAPRTPSKRRGLAPNTPGKARKLNTTTMSNA	19.8419	19.951	19.732	19.4764	19.4316	19.3082	19.9043	19.8956	19.7416	3			1	0.00707636	93.614	25.889	47.189	-0.33997	287300000	481	7765300	10522	725790	0	0	695960	0	0
	0.836331	0.238663	+	1.67841	0.497844	+	2.92832	0.259181	Q8NFH8	260	Q8NFH8	Q8NFH8	RalBP1-associated Eps domain-containing protein 2	REPS2	S						GTKPLRHQASLIRSFSVERELQDNSSYPDEP	15.2507	14.8237	14.8978	15.5224	15.4317	15.5116	15.2467	15.2376	15.2039	3			0.977137	5.88e-43	283.17	250.81	283.17	-0.45994	72361000	260	360141	0	31968	0	0	21932	0	0
+	2.64473	-0.502646	+	3.15085	1.31881	+	3.77872	1.82146	Q8NG31	1690	Q8NG31	Q8NG31	Protein CASC5	CASC5	S						SLGIFLPRLPNKRNCSVTGIDDLEQIPADTT	13.6865	13.629	13.4868	14.8369	14.7534	15.1684	13.015	13.1415	13.1378	3			0.960389	1.47e-05	88.987	74.933	88.987	-0.78354	97904000	1690	163650	0	11032	0	0	9799.4	0	0
	1.36937	-0.0775611	+	4.48047	-0.567265	+	4.17564	-0.489704	Q9NUL3	486	Q9NUL3	Q9NUL3	Double-stranded RNA-binding protein Staufen homolog 2	STAU2	S						NGTSSTAEAIGLKGSSPTPPCSPVQPSKQLE	17.9608	17.9938	17.9312	17.3657	17.3832	17.4352	17.8716	17.8592	17.9224	2			0.978352	4.22e-09	188.44	162.72	165.64	-0.55421	217850000	486	2007720	1241.2	139140	62792	0	134310	51647	0
	1.16177	0.158795	+	1.85148	-0.739153	+	2.22843	-0.897948	Q8N108	488	Q8N108	Q8N108	Mesoderm induction early response protein 1	MIER1	S						ERPAKRRRVNSNGKESPGSSEFFQEAVSHGK	15.6079	15.7486	15.5428	15.0967	15.0219	14.5634	15.8192	15.8061	15.7505	4			0.953489	6.27e-13	141.49	127.69	141.49	0.51618	113740000	488	413638	0	40759	0	0	40920	0	0
	0.564895	-0.332064	+	1.302	-0.866676	+	1.22724	-0.534612	Q8N8S7	488	Q8N8S7	Q8N8S7	Protein enabled homolog	ENAH	S						KGEDSEPVTSKASSTSTPEPTRKPWERTNTM	17.0246	17.6772	16.8644	16.2071	16.6902	16.0687	16.9816	16.708	16.8803	2			0.760586	1.83e-09	207.47	184.09	207.47	1.6967	54932000	488	1038020	0	106820	0	0	150210	0	0
	0.862996	-0.235529	+	3.22079	1.38333	+	3.97834	1.61886	Q8NG31	60	Q8NG31	Q8NG31	Protein CASC5	CASC5	S						QESNALRNKKNSRRVSFADTIKVFQTESHMK	15.4222	15.0608	15.1244	16.4652	16.5396	16.7526	14.9087	14.9034	15.0887	3			1	0.0015126	117.03	78.673	117.03	-1.0324	54061000	60	531028	1208.8	35920	0	0	25734	0	0
	0.0730816	0.021335	+	2.5583	-0.728322	+	3.65171	-0.749657	Q9P2B7	488	Q9P2B7	Q9P2B7	Cilia- and flagella-associated protein 97	CFAP97	S						SSPLSRRARSTLGQYSPLRASRTSSATSGLS	17.6404	17.8157	17.476	17.0178	16.8739	16.8554	17.7115	17.6736	17.6109	2			1	0.000259826	147.52	116.09	147.52	0.2837	111490000	488	1601860	249.63	162390	0	0	164920	0	0
	0.729972	-0.0643024	+	3.2546	-0.444102	+	2.50335	-0.3798	Q8IWQ3;Q8TDC3	489;563	Q8IWQ3	Q8IWQ3	Serine/threonine-protein kinase BRSK2;Serine/threonine-protein kinase BRSK1	BRSK2;BRSK1	S				yes		PWRARLNSIKNSFLGSPRFHRRKLQVPTPEE	17.4118	17.4137	17.4223	16.8858	16.9976	17.0321	17.2736	17.4077	17.3736	2			0.999962	0.0218577	81.799	32.327	81.799	0.10767	75238000	489	1416010	0	139010	0	0	125760	0	0
	0.557492	0.176381	+	2.50302	0.895172	+	3.42104	0.718791	Q8NHG8	82	Q8NHG8	Q8NHG8	E3 ubiquitin-protein ligase ZNRF2	ZNRF2	S						AAAAAPAAPAAPRSRSLGGAVGSVASGARAA	15.913	15.4538	15.6568	16.6252	16.6072	16.4767	15.9131	15.8763	15.7633	3			0.994226	0.000104364	106.47	76.779	106.47	0.44103	169970000	82	647981	0	50156	0	0	33543	0	0
	0.198079	0.104911	+	3.58906	2.25537	+	4.43538	2.15046	Q8NI08	441	Q8NI08	Q8NI08	Nuclear receptor coactivator 7	NCOA7	S						TGGGMHKKDTLKECLSLDPEERKKAESQINN	16.0165	15.5793	16.1786	18.1204	18.1512	18.2689	15.9121	15.954	16.223	3			0.999954	9.12e-05	121.44	103.02	121.44	-1.242	39086000	441	1379590	937.88	53814	0	0	36504	0	0
	0.213567	0.0548083	+	2.19637	-0.586517	+	3.12346	-0.641326	Q86SQ0	489	Q86SQ0	Q86SQ0	Pleckstrin homology-like domain family B member 2	PHLDB2	S						EDVQKINKELEKLQLSDEESVFEEALMSPDT	18.1297	17.8731	17.8275	17.4301	17.2361	17.4045	17.9339	18.0422	18.0186	3			0.999976	1.38e-14	168.95	162.66	168.95	0.44983	189180000	489	2052450	958.33	226510	0	0	171420	0	0
	0.372178	0.107159	+	1.792	-0.497348	+	4.07894	-0.604506	Q8N8S7	489	Q8N8S7	Q8N8S7	Protein enabled homolog	ENAH	T						GEDSEPVTSKASSTSTPEPTRKPWERTNTMN	18.6806	18.5419	18.273	17.9338	18.0277	18.042	18.5894	18.5918	18.6358	4			0.958428	0.00445628	76.713	54.703	76.713	-1.1544	468980000	489	3109950	0	329480	0	0	269110	0	0
	1.05298	-0.0437953	+	3.386	-0.355588	+	3.24723	-0.311792	Q86YP4	49	Q86YP4	Q86YP4	Transcriptional repressor p66-alpha	GATAD2A	T						GLLASDLNTDGDMRVTPEPGAGPTQGLLRAT	19.1259	19.0988	19.0721	18.6987	18.7339	18.7975	19.0315	19.0689	19.065	3			0.999994	5.17e-42	242.12	204.21	242.12	-0.32971	1647800000	49	4671850	8060.9	446020	0	0	391770	0	0
	0.453446	-0.130224	+	3.36039	1.33737	+	5.50284	1.4676	Q8TB72	587	Q8TB72	Q8TB72	Pumilio homolog 2	PUM2	S				yes		SSVGSSASSSATRRESLSTSSDLYKRSSSSL	17.1059	16.8045	17.209	18.3322	18.3623	18.437	16.8752	16.897	16.9565	3			0.982181	0.0077154	71.286	48.68	71.286	1.7395	288440000	587	1890300	0	112890	0	0	83399	0	0
	0.0585566	0.0311228	+	2.597	-1.02144	+	3.01674	-1.05256	Q9UHD8	49	Q9UHD8	Q9UHD8	Septin-9	44083	T						EEVETPNSTPPRRVQTPLLRATVASSTQKFQ	18.7853	18.8843	18.4076	17.6626	17.7502	17.6001	18.8509	18.8213	18.4983	3			1	0.00109541	135.15	83.311	134.3	0.025247	800380000	49	3179030	5375.1	353780	0	0	339000	0	0
	0.39988	-0.0842482	+	2.42422	-0.435834	+	2.23034	-0.351585	Q99501	490	Q99501	Q99501	GAS2-like protein 1	GAS2L1	S						PRARSPAAPRLSRVSSPSPELGTTPASIFRT	17.5311	17.3218	17.3437	17.0016	16.9088	16.9786	17.3883	17.1968	17.3587	2			0.985509	6.2e-22	235.78	164.23	155.98	0.5044	324980000	490	1395960	1917.8	150750	0	0	118200	0	0
	0.249137	0.030872	+	2.45885	0.370351	+	2.86898	0.339478	Q8TBZ3	357	Q8TBZ3	Q8TBZ3	WD repeat-containing protein 20	WDR20	S				yes		RDRANSTQSRLSKRNSTDSRPVSVTYRFGSV	15.6543	15.7711	15.8052	16.1687	16.0391	16.1339	15.8065	15.7722	15.7446	3			0.919003	0.001198	88.551	57.589	66.982	0.2589	125650000	357	557846	869.51	42063	0	0	41544	0	0
	0.647383	0.103144	+	2.778	-0.930948	+	2.80203	-1.03409	Q9NZJ0	490	Q9NZJ0	Q9NZJ0	Denticleless protein homolog	DTL	S				yes		KARSPINRRGSVSSVSPKPPSSFKMSIRNWV	20.2908	20.39	20.2925	19.4151	19.5884	19.177	20.3097	20.4428	20.5302	3			0.971037	1.17e-06	154.55	131.65	154.55	0.22548	582620000	490	10254300	38992	984990	0	0	935710	0	0
	1.40809	-0.223387	+	3.72216	1.36244	+	4.22064	1.58583	Q8TC07	70	Q8TC07	Q8TC07	TBC1 domain family member 15	TBC1D15	S						DDALDSSSILYARKDSSSVVEWTQAPKERGH	19.4594	19.24	19.338	20.594	20.6652	20.8656	19.1493	19.1704	19.0475	3			0.99685	1.11e-17	227.95	186.39	227.25	0.047349	344730000	70	9416990	1273.8	559540	0	0	430910	0	0
	1.48293	-0.588082	+	1.89834	0.897123	+	3.83183	1.4852	Q8TD19	332	Q8TD19	Q8TD19	Serine/threonine-protein kinase Nek9	NEK9	S			yes	yes		EKVTLLNAPTKRPRSSTVTEAPIAVVTSRTS	14.8274	15.0479	15.4488	16.0174	15.8224	16.1756	14.5547	14.5364	14.4687	2			0.991006	4.65e-07	171.26	132.48	171.26	0.46144	34881000	332	388905	0	23969	0	0	25510	0	0
	0.209885	-0.0427678	+	2.07973	-0.376822	+	2.23008	-0.334054	Q6UN15	492	Q6UN15	Q6UN15	Pre-mRNA 3'-end-processing factor FIP1	FIP1L1	S						RERERTRERERERDHSPTPSVFNSDEERYRY	20.5411	20.6851	20.4645	20.1697	20.1223	20.2683	20.5097	20.4486	20.6042	3			0.999832	8.73e-67	352.05	321.62	352.05	0.074418	2570100000	492	12854200	25960.2	751590	416130	0	660790	480970	0
	0.28066	0.0894267	+	2.03796	0.746781	+	2.17239	0.657354	Q8TD19	333	Q8TD19	Q8TD19	Serine/threonine-protein kinase Nek9	NEK9	T			yes			KVTLLNAPTKRPRSSTVTEAPIAVVTSRTSE	17.736	17.7287	18.069	18.7133	18.692	18.3688	17.8483	18.0545	17.8991	2			0.991956	1.24e-06	173.15	150.92	134.81	-0.33417	170920000	333	2758060	18194	173300	0	0	155520	0	0
	0.850478	0.246785	+	1.8985	0.73173	+	1.41417	0.484945	Q8TEK3	786	Q8TEK3	Q8TEK3	Histone-lysine N-methyltransferase, H3 lysine-79 specific	DOT1L	S						YTRLSPAKIVLRRHLSQDHTVPGRPAASELH	17.6902	17.5092	17.8692	18.5851	18.1542	18.5246	18.103	17.8885	17.8175	5			0.999984	1.04e-17	215.46	181.75	180.42	0.33722	469510000	786	2559640	2446.9	167990	0	0	134120	0	0
	0.814145	0.354823	+	2.57101	0.984036	+	1.25787	0.629213	Q8TEQ6	1366	Q8TEQ6	Q8TEQ6	Gem-associated protein 5	GEMIN5	S						RMLSTFKELFSEKHASLQNSQRTVAEVQETL	12.7151	12.5141	12.6772	13.6176	13.3866	13.8543	13.3037	12.6412	13.026	2			0.999613	0.0209458	79.489	24.767	79.489	3.195	116680000	1366	85063.5	0	5698.1	0	0	4620.6	0	0
	0.0704603	-0.0196953	+	1.47784	-0.388144	+	1.52319	-0.368448	O60825	493	O60825	O60825	6-phosphofructo-2-kinase/fructose-2,6-bisphosphatase 2;6-phosphofructo-2-kinase;Fructose-2,6-bisphosphatase	PFKFB2	S				yes		RPRNYSVGSRPLKPLSPLRAQDMQEGAD___	19.0694	18.8265	18.8514	18.537	18.6859	18.3601	18.8155	19.0136	18.8592	3			0.999999	9.54e-06	135.91	118.83	135.91	0.15715	622160000	493	4111860	11761	429210	0	0	326050	0	0
	0.146566	0.0269006	+	2.40354	-0.375419	+	2.15431	-0.40232	Q15596	493	Q15596	Q15596	Nuclear receptor coactivator 2	NCOA2	S						NPGQPTSMLSPRHRMSPGVAGSPRIPPSQFS	16.4753	16.5578	16.4419	16.1933	16.0158	16.1397	16.4286	16.6295	16.4978	3			1	0.000240216	123.29	87.877	123.29	-0.67173	341380000	493	774459	0	73523	0	0	70614	0	0
	0.439552	0.212312	+	1.51932	0.647286	+	1.94983	0.434974	Q8TEU7	1507	Q8TEU7	Q8TEU7	Rap guanine nucleotide exchange factor 6	RAPGEF6	T						VTSPKKDDRYREPPPTPPGYLGISLADLKEG	15.783	15.1396	15.3428	16.0941	15.9697	16.1435	15.6483	15.484	15.7701	3			0.999992	4.01e-10	167	130.23	167	-0.53312	40968000	1507	507920	0	45911	0	0	27137	0	0
	1.05852	0.316485	+	2.58936	-0.668753	+	3.03471	-0.985238	Q9HCH0	494	Q9HCH0	Q9HCH0	Nck-associated protein 5-like	NCKAP5L	S						NSRIPCRNSGSDGSPSPLLARRGLGGGELSP	16.6701	16.7189	16.4201	15.989	15.8633	15.9506	17.045	16.7094	17.0042	2			0.996831	8.84e-10	195.45	140.09	195.45	-0.13405	93249000	494	865395	0	83933	0	0	78720	0	0
	0.252914	-0.0539411	+	1.65712	-0.427994	+	1.98568	-0.374053	O43432	495	O43432	O43432	Eukaryotic translation initiation factor 4 gamma 3	EIF4G3	S				yes		QTEEILDSQNLNSRRSPVPAQIAITVPKTWK	20.5975	20.8608	20.8401	20.3034	20.4942	20.217	20.7213	20.7096	20.7058	2			1	2.07e-06	164.65	132.43	164.65	-0.50278	429440000	495	14582000	14050	1213500	0	0	1285300	0	0
	0.771955	0.100969	+	1.70165	-0.271668	+	2.45025	-0.372637	Q6VY07	495	Q6VY07	Q6VY07	Phosphofurin acidic cluster sorting protein 1	PACS1	S			yes	yes		KTPMKSSKTDLQGSASPSKVEGVHTPRQKRS	19.5769	19.5968	19.7388	19.4676	19.3274	19.3026	19.7171	19.8016	19.6967	4			0.999932	1.35e-42	286.7	266.95	286.7	0.88879	377530000	495	7210770	14406	606100	0	0	548120	0	0
	0.195124	0.100041	+	1.14039	0.790289	+	1.2377	0.690248	Q8TEW0	715	Q8TEW0	Q8TEW0	Partitioning defective 3 homolog	PARD3	S			yes			ELPIETALDDRERRISHSLYSGIEGLDESPS	14.898	14.2489	14.7397	15.1987	15.1199	15.9388	14.722	14.6915	14.7732	3			0.999349	6.49e-33	264.07	228.68	264.07	-0.64148	222360000	715	307767	0	25149	0	0	14884	0	0
+	4.58293	0.79863	+	7.37194	1.79751	+	4.93026	0.998879	Q8TF72	1441	Q8TF72	Q8TF72	Protein Shroom3	SHROOM3	S						PPPSRAKWAHAAREDSLPEESSAPDFANLKH	13.6835	13.6767	13.6499	15.4916	15.4639	15.4473	14.4011	14.5192	14.4857	3			0.99959	1.2e-07	123.89	105.33	123.89	-0.54647	52158000	1441	256181	357.51	11010	0	0	10120	0	0
+	2.03898	0.491558	+	3.83005	1.78179	+	4.22072	1.29024	Q8WUA7	167	Q8WUA7	Q8WUA7	TBC1 domain family member 22A	TBC1D22A	S				yes		PAESASDAAPLQRSQSLPHSATVTLGGTSDP	16.3952	16.3992	16.7084	18.3288	18.1406	18.3789	17.0077	16.9888	16.981	3			0.761958	2.67e-60	286.72	266.1	156.12	-1.3826	567670000	167	1738460	0	69624	0	0	63455	0	0
	0.179513	-0.0445264	+	2.23275	-0.380726	+	1.66644	-0.336199	Q9P2B7	497	Q9P2B7	Q9P2B7	Cilia- and flagella-associated protein 97	CFAP97	S						STLGQYSPLRASRTSSATSGLSCRSERSAVD	17.0304	16.9219	16.8497	16.5378	16.4792	16.6429	16.8569	17.0385	16.7731	2			0.99561	3.32e-09	147.02	115.59	147.02	0.2409	0	497	1034710	1640.5	107240	0	0	90265	0	0
	0.0874551	0.0396341	+	1.17107	-0.469945	+	1.593	-0.509579	Q9ULL1	497	Q9ULL1	Q9ULL1	Pleckstrin homology domain-containing family G member 1	PLEKHG1	S						SETAQDIQKVSREEGSPQLSSARPSPAQRNS	16.4916	16.0098	16.1747	15.51	15.8373	15.9191	16.417	16.2101	16.1681	4			0.984797	6.81e-10	155.73	124.56	155.73	0.52352	93496000	497	639633	0	74343	0	0	48800	0	0
	0.996631	0.117273	+	3.29682	-0.801063	+	3.3681	-0.918336	Q8TEV9	498	Q8TEV9	Q8TEV9	Smith-Magenis syndrome chromosomal region candidate gene 8 protein	SMCR8	S				yes		VLSKSDSQASLTVPLSPQVVRSKAVSHRTIS	17.1302	17.0621	17.0287	16.1824	16.2207	16.4149	17.2833	17.1524	17.1371	2			0.999634	3.05e-06	147.17	120.03	147.17	0.38824	195480000	498	1103300	722.06	114780	0	0	99217	0	0
	0.6215	0.252278	+	1.6797	-0.621913	+	2.19687	-0.874191	Q09666	4986	Q09666	Q09666	Neuroblast differentiation-associated protein AHNAK	AHNAK	S						KIPKFKKPKFGFGAKSPKADIKSPSLDVTVP	18.3785	18.1671	17.9287	17.4934	17.3761	17.739	18.4564	18.1689	18.6058	3			1	0.00962098	66.953	36.126	66.953	-0.085398	139490000	4986	2528790	0	268260	0	0	209010	0	0
	0.556073	-0.132971	+	1.44811	-0.326159	+	3.26692	-0.193188	Q96ES7	5	Q96ES7	Q96ES7	SAGA-associated factor 29 homolog	CCDC101	S						___________MALVSADSRIAELLTELHQL	21.5414	21.6119	21.2693	21.1351	21.1539	21.1551	21.3772	21.3219	21.3246	2			0.999994	0.0394472	63.306	21.212	63.306	-3.7031	1991300000	5	23759400	0	2305700	0	0	2132900	0	0
	1.05544	-0.162985	+	1.9785	0.457108	+	2.56752	0.620093	Q8WUF5	113	Q8WUF5	Q8WUF5	RelA-associated inhibitor	PPP1R13L	S			yes			GRSESAPTLHPYSPLSPKGRPSSPRTPLYLQ	19.8247	19.6318	19.6849	20.0738	20.1036	20.3353	19.4632	19.6047	19.5846	3			0.996994	9.55e-22	236.27	205.16	236.27	-0.43366	918800000	113	8710570	6973.5	717370	0	0	561170	0	0
	0.153129	-0.0408007	+	1.87706	-0.434627	+	3.8808	-0.393826	O95425	50	O95425	O95425	Supervillin	SVIL	S						LEEDTPRYMRASDPASPHIGRSNEEEETSDS	18.388	18.4267	18.1117	17.9246	17.8386	17.8594	18.2593	18.2605	18.2843	3			0.999859	0.000337902	100.54	86.825	100.54	0.20989	0	50	2646400	4526.1	270020	0	0	249010	0	0
	1.02954	0.235852	+	1.69313	-0.33003	+	2.87478	-0.565882	P18031	50	P18031	P18031	Tyrosine-protein phosphatase non-receptor type 1	PTPN1	S				yes		AKLPKNKNRNRYRDVSPFDHSRIKLHQEDND	16.8603	16.6404	16.9188	16.4701	16.523	16.4363	17.1531	16.924	17.0499	3			0.992836	0.00272666	95.067	67.658	43.914	0.086417	93295000	50	1040990	3026.1	95528	0	0	74660	0	0
	0.413826	0.0780532	+	1.63355	-0.345991	+	1.89725	-0.424044	Q9P258	50	Q9P258	Q9P258	Protein RCC2	RCC2	S						KRERPERCSSSSGGGSSGDEDGLELDGAPGG	17.5261	17.6858	17.5157	17.1828	17.3851	17.1218	17.5396	17.7315	17.6906	3			0.969142	1.7e-05	100.88	93.848	100.88	-0.083206	246590000	50	1678350	2776.3	0	150240	0	0	151080	0
	0.0958942	0.0398839	+	1.07166	-0.41221	+	1.34916	-0.452094	Q6UN15	500	Q6UN15	Q6UN15	Pre-mRNA 3'-end-processing factor FIP1	FIP1L1	S						RERERDHSPTPSVFNSDEERYRYREYAERGY	19.024	19.4031	19.0449	18.5735	18.6561	19.0057	19.1034	19.1242	19.364	3			1	4.05e-36	284.63	259.13	284.63	-0.1473	418170000	500	4960960	20731	0	416130	0	0	480970	0
	1.43994	0.305696	+	2.47433	-0.380746	+	2.76278	-0.686442	Q8N3V7	501	Q8N3V7	Q8N3V7	Synaptopodin	SYNPO	S			yes			PFGIQAPGGTSQMERSPMLERRHFGEKAPAP	16.7409	16.9043	16.7731	16.3904	16.3903	16.4953	17.272	16.9817	17.0817	4			0.998732	3.63e-05	100.24	77.364	100.24	0.35706	401960000	501	1047420	0	88079	0	0	89194	0	0
	0.306908	0.237808	+	3.21363	1.85379	+	2.41335	1.61598	Q8WUF5	173	Q8WUF5	Q8WUF5	RelA-associated inhibitor	PPP1R13L	T			yes			SPRPGPGPLRQQGPPTPFDFLGRAGSPRGSP	13.5449	13.1525	12.9372	15.1559	14.9388	15.1014	13.7215	12.9277	13.6988	2			1	0.000117762	151.38	123.41	151.38	-0.18878	21312000	173	174639	0	10019	0	0	7106.7	0	0
	0.0880915	0.0226218	+	2.80188	-0.516518	+	2.91616	-0.539139	Q9BUH8	502	Q9BUH8	Q9BUH8	Brain-enriched guanylate kinase-associated protein	BEGAIN	S				yes		LAEPCFLRAGGDLSLSPGRSADPLPGYAPSE	17.5851	17.4672	17.3585	16.9787	16.9614	16.921	17.6174	17.4082	17.453	2			0.999994	2.05e-05	152.31	116.06	152.31	1.0931	172660000	502	1481600	0	156390	0	0	130370	0	0
	0.573634	0.128171	+	2.99915	-1.23855	+	3.21506	-1.36672	Q6VY07	504	Q6VY07	Q6VY07	Phosphofurin acidic cluster sorting protein 1	PACS1	T			yes			DLQGSASPSKVEGVHTPRQKRSTPLKERQLS	17.5156	17.4731	17.2737	16.4181	16.0032	16.1254	17.679	17.5009	17.4669	4			1	3.26e-17	207.64	188.76	207.64	0.30471	61153000	504	1317230	797.58	149170	0	0	130900	0	0
	1.30821	-0.0713501	+	2.87657	-0.416508	+	2.70373	-0.345158	Q92574	505	Q92574	Q92574	Hamartin	TSC1	S				yes		TTAEAEPVVPRGGFDSPFYRDSLPGSQRKTH	18.1015	18.0224	18.0727	17.6258	17.739	17.5823	18.0041	17.9724	18.0061	2			1	1.57e-05	161.67	107.25	161.67	0.16275	241980000	505	2228720	808.77	222200	0	0	189590	0	0
	0.0420587	-0.0077769	+	1.73813	-0.264822	+	2.43018	-0.257045	Q8N8S7	506	Q8N8S7	Q8N8S7	Protein enabled homolog	ENAH	S						EPTRKPWERTNTMNGSKSPVISRRDSPRKNQ	19.2129	19.1393	19.0118	18.8806	18.9027	18.7863	19.1343	19.0682	19.1383	3			0.87092	6.84e-05	110.77	92.852	84.213	0.087969	636220000	506	4875950	8998.4	473190	0	0	402590	0	0
	0.872453	-0.374494	+	2.00126	0.783868	+	2.60916	1.15836	Q8WUF5	183	Q8WUF5	Q8WUF5	RelA-associated inhibitor	PPP1R13L	S			yes			QQGPPTPFDFLGRAGSPRGSPLAEGPQAFFP	13.6662	13.1933	13.5349	14.2113	14.1055	14.4291	13.2747	12.8119	13.1842	3			1	0.0193314	54.259	36.342	54.259	0.043249	17797000	183	122412	0	0	10881	0	0	7304.8	0
	0.872453	-0.374494	+	2.00126	0.783868	+	2.60916	1.15836	Q8WUF5	187	Q8WUF5	Q8WUF5	RelA-associated inhibitor	PPP1R13L	S			yes			PTPFDFLGRAGSPRGSPLAEGPQAFFPERGP	13.6662	13.1933	13.5349	14.2113	14.1055	14.4291	13.2747	12.8119	13.1842	3			1	0.0193314	54.259	36.342	54.259	0.043249	17797000	187	122412	0	0	10881	0	0	7304.8	0
	1.06798	0.128019	+	2.69346	-0.331089	+	3.42713	-0.459107	Q5FBB7	507	Q5FBB7	Q5FBB7	Shugoshin-like 1	SGOL1	S						KLRRGDPFTDLCFLNSPIFKQKKDLRRSKKR	16.2136	16.2998	16.36	15.9946	15.9541	15.9315	16.4145	16.3575	16.4855	3			0.999999	0.000253903	97.776	85.099	97.776	1.0064	37428000	507	700669	0	61534	0	0	59341	0	0
	0.15975	-0.0419019	+	1.49406	-0.372486	+	1.95614	-0.330584	Q8N8S7	508	Q8N8S7	Q8N8S7	Protein enabled homolog	ENAH	S				yes		TRKPWERTNTMNGSKSPVISRRDSPRKNQIV	20.9671	21.043	20.7318	20.4434	20.6708	20.5102	20.8324	20.9315	20.8522	3			0.999948	1.63e-09	183.74	117.41	183.74	-1.0997	3319900000	508	16372200	37503	1560200	0	0	1453300	0	0
	0.37305	0.0869395	+	1.75508	-0.40008	+	2.59753	-0.48702	O14974	509	O14974	O14974	Protein phosphatase 1 regulatory subunit 12A	PPP1R12A	S			yes			LAYVAPTIPRRLASTSDIEEKENRDSSSLRT	15.6253	15.3809	15.6516	15.0683	15.1312	15.258	15.6378	15.5608	15.72	4			0.759776	0.0203234	58.09	42.669	58.09	0.69616	42394000	509	411629	876.25	41240	0	0	31933	0	0
	0.248766	-0.131598	+	1.33203	0.398233	+	1.40146	0.529832	Q8WUF5	526	Q8WUF5	Q8WUF5	RelA-associated inhibitor	PPP1R13L	S			yes			ARVLAEIPRPLKRRGSMEQAPAVALPPTHKK	18.299	18.3254	17.931	18.4886	18.5726	18.6889	17.846	18.3825	17.9321	4			1	4.11e-06	126.68	113.45	126.68	-0.59601	119530000	526	2971060	5286.5	254150	0	0	232550	0	0
	0.359553	-0.0888627	+	1.43257	-0.31422	+	2.27202	-0.225358	O94913	509	O94913	O94913	Pre-mRNA cleavage complex 2 protein Pcf11	PCF11	S						SPKRRDRRSPKRRQRSMSPTSTPKAGKIRQS	18.1089	18.2476	17.9088	17.7566	17.7384	17.8276	17.9741	18.0607	17.964	2			0.998234	0.00549575	120.84	86.952	120.84	0.4974	170700000	509	2300610	0	0	223330	0	0	220670	0
	0.399441	0.0349973	+	2.50068	0.350826	+	2.29459	0.315828	Q8WUI4	181	Q8WUI4	Q8WUI4	Histone deacetylase 7	HDAC7	S				yes		KKSLERRKNPLLRKESAPPSLRRRPAETLGD	17.9529	17.9048	17.8675	18.3291	18.1637	18.285	17.9393	17.9932	17.8977	3			1	0.000211678	159.66	110.23	159.66	0.3631	294420000	181	2500860	7800.1	200840	0	0	175140	0	0
	0.434633	-0.1417	+	3.09675	1.17682	+	3.18168	1.31852	Q8WUI4	405	Q8WUI4	Q8WUI4	Histone deacetylase 7	HDAC7	S				yes		RSAKPSEKPRLRQIPSAEDLETDGGGPGQVV	14.8633	15.1664	15.1085	16.3927	16.1865	16.0894	14.851	14.7565	15.1055	3			1	2.05e-17	163.48	150.55	163.48	-0.80989	108140000	405	438402	0	24561	0	0	27632	0	0
	0.704274	0.348544	+	3.78689	2.01845	+	3.20593	1.66991	Q8WWI1	1204	Q8WWI1	Q8WWI1	LIM domain only protein 7	LMO7	S						SLKNLKRRSQFFEQGSSDSVVPDLPVPTISA	12.1422	11.8865	12.3958	14.1593	14.1524	14.1682	12.6515	12.1474	12.6712	3			0.756632	1.86e-07	109.54	98.083	109.54	0.48997	16347000	1204	90516	0	3859.3	0	0	3026.4	0	0
	0.391244	-0.0501397	+	2.1838	-0.345406	+	1.77223	-0.295266	Q16514	51	Q16514	Q16514	Transcription initiation factor TFIID subunit 12	TAF12	S						AVVKIPGTPGAGGRLSPENNQVLTKKKLQDL	20.2039	20.199	20.1129	19.8414	19.9215	19.7167	20.0355	20.1411	20.1888	3			0.999994	5.35e-17	188.55	161.28	188.55	0.4628	1013800000	51	9824760	25520	928420	0	0	822620	0	0
	0.100072	-0.0431506	+	2.64105	0.84878	+	3.15069	0.89193	Q8WWI1	1493	Q8WWI1	Q8WWI1	LIM domain only protein 7	LMO7	S				yes		TPLHNDNSWIRQRSASVNKEPVSLPGIMRRG	21.3763	21.5522	21.1297	22.198	22.196	22.2106	21.2929	21.481	21.1548	3			0.999936	1.92e-21	231.93	209.08	231.93	-0.062979	7554200000	1493	31638700	10703	2060800	0	0	2048800	0	0
	0.263243	0.0615813	+	1.61411	-0.322731	+	1.9467	-0.384312	Q9P258	51	Q9P258	Q9P258	Protein RCC2	RCC2	S						RERPERCSSSSGGGSSGDEDGLELDGAPGGG	18.0484	18.2312	18.005	17.7761	17.8737	17.6667	18.0447	18.2609	18.1638	3			0.99287	3.64e-23	189.45	178.35	100.88	-0.083206	401750000	51	2404810	3643.69	64075	150240	0	67163	151080	0
	0.414952	-0.130908	+	1.55546	-0.429018	+	1.51817	-0.29811	Q9Y5K6	510	Q9Y5K6	Q9Y5K6	CD2-associated protein	CD2AP	S						KMPGRRLPGRFNGGHSPTHSPEKILKLPKEE	19.158	19.5194	19.2022	18.9754	18.8243	18.7929	19.1936	19.2668	19.0265	3			0.998189	2.86e-05	148.85	96.736	84.195	0.53809	208830000	510	5130470	11766.5	109000	346860	0	126300	393940	0
	0.425339	-0.0829601	+	1.6484	-0.298878	+	2.69097	-0.215918	O94913	511	O94913	O94913	Pre-mRNA cleavage complex 2 protein Pcf11	PCF11	S						KRRDRRSPKRRQRSMSPTSTPKAGKIRQSGA	16.7256	16.8387	16.5624	16.4046	16.378	16.4474	16.5872	16.6651	16.6255	2			0.906016	0.00549575	120.84	86.952	120.84	0.4974	87375000	511	887530	0	0	87165	0	0	85340	0
	0.697563	0.294719	+	2.78862	1.51977	+	2.49357	1.22505	Q8WWI1	751	Q8WWI1	Q8WWI1	LIM domain only protein 7	LMO7	S						QKWQDDLAKWKDRRKSYTSDLQKKKEEREEI	19.0442	19.3598	18.8794	20.8627	20.3683	20.6117	19.5656	19.4692	19.1327	3			0.999699	4.58e-05	162.7	128.44	135.37	0.22789	736230000	751	9145440	4134.3	421880	0	0	467150	0	0
+	2.11352	-0.489933	+	3.0736	0.913252	+	5.77388	1.40318	Q8WWI1	805	Q8WWI1	Q8WWI1	LIM domain only protein 7	LMO7	S						SQNQKSTVPSRRRMYSFDDVLEEGKRPPTMT	18.5819	18.5094	18.26	19.3106	19.4068	19.3736	17.9359	17.99	17.9556	2			1	1.16e-10	222.1	165.15	222.1	0.90032	405660000	805	3992460	2492.1	308070	0	0	263270	0	0
	1.29594	-0.217358	+	2.42834	-0.452513	+	2.74474	-0.235156	Q9NYF8	512	Q9NYF8	Q9NYF8	Bcl-2-associated transcription factor 1	BCLAF1	S						PEQVKSEKLKDLFDYSPPLHKNLDAREKSTF	25.6363	25.6784	25.4407	25.1196	25.1609	25.1173	25.3162	25.3721	25.4149	4			0.999999	0.000107578	140.81	121.26	140.81	-0.2721	11759000000	512	392927000	1118800	37354000	0	0	33099000	0	0
	1.00293	0.231047	+	2.56176	1.38812	+	2.4722	1.15708	Q8WWI1	932	Q8WWI1	Q8WWI1	LIM domain only protein 7	LMO7	T						FGSQTRGISSLPRSYTMDDAWKYNGDVEDIK	18.7358	18.5059	18.8606	20.2224	20.3176	19.7267	18.9759	18.9446	18.875	2			0.999434	4.91e-14	214.82	148.63	108.7	0.345	448600000	932	6486730	5843.6	342060	0	0	262650	0	0
	0.784123	0.190739	+	2.53399	0.95404	+	2.83134	0.763301	Q8WWM7	335	Q8WWM7	Q8WWM7	Ataxin-2-like protein	ATXN2L	S						GRTEEEKHSAVQRQGSGRESPSLASREGKYI	17.1786	17.163	16.8381	18.0297	18.1731	17.8391	17.2177	17.269	17.2653	2			0.980247	0.0029868	107.62	83.912	107.62	-0.25687	117470000	335	1731410	0	0	118620	0	0	106200	0
	0.405885	-0.125714	+	1.66306	-0.432046	+	1.58503	-0.306332	Q9Y5K6	514	Q9Y5K6	Q9Y5K6	CD2-associated protein	CD2AP	S						RRLPGRFNGGHSPTHSPEKILKLPKEEDSAN	18.7563	19.107	18.818	18.5515	18.4463	18.3874	18.7784	18.8918	18.6339	3			0.998983	2.86e-05	148.85	96.736	148.85	-0.48748	111870000	514	3894620	11749	0	346860	0	0	393940	0
	0.784123	0.190739	+	2.53399	0.95404	+	2.83134	0.763301	Q8WWM7	341	Q8WWM7	Q8WWM7	Ataxin-2-like protein	ATXN2L	S						KHSAVQRQGSGRESPSLASREGKYIPLPQRV	17.1786	17.163	16.8381	18.0297	18.1731	17.8391	17.2177	17.269	17.2653	2			0.770996	0.0029868	107.62	83.912	107.62	-0.25687	117470000	341	1731410	0	0	118620	0	0	106200	0
	0.282598	0.0656834	+	1.90942	-0.412309	+	3.55379	-0.477992	Q6ZRV2	516	Q6ZRV2	Q6ZRV2	Protein FAM83H	FAM83H	S						GPDGHQRLDYVPSSASREVRHGSDPAFAPGP	17.5426	17.6857	17.374	17.0605	17.1543	17.1506	17.6485	17.5619	17.5889	3			0.789622	0.000123154	127.2	90.674	127.2	-0.085757	134700000	516	1599940	429.19	151940	0	0	151070	0	0
	1.12027	0.188541	+	4.19333	0.790018	+	2.71034	0.601477	Q8WWQ0	1783	Q8WWQ0	Q8WWQ0	PH-interacting protein	PHIP	S						TRNQGRRTAFYNEDDSEEEQRQLLFEDTSLT	15.4479	15.4118	15.3572	16.2073	16.1266	16.253	15.6711	15.445	15.6664	2			1	6.83e-06	120.63	101.57	120.63	-1.0687	105860000	1783	520494	0	36556	0	0	32604	0	0
	1.55493	0.261699	+	2.8184	-0.545136	+	4.00236	-0.806835	Q9HCM4	517	Q9HCM4	Q9HCM4	Band 4.1-like protein 5	EPB41L5	S						LKDTSEKLKQLEMENSPLLSPRSNIDVNINS	14.7544	14.5329	14.6193	14.0408	14.141	14.0893	14.8116	14.9469	14.9332	2			0.999693	0.00904081	76.358	60.768	76.358	-2.3748	18621000	517	221718	6.9694	22808	0	0	18026	0	0
	0.0638705	0.0787423	+	0.842792	0.922678	+	1.40816	0.843936	Q8WWY3	439	Q8WWY3	Q8WWY3	U4/U6 small nuclear ribonucleoprotein Prp31	PRPF31	S						LQRTLQKQSVVYGGKSTIRDRSSGTASSVAF	18.3562	17.068	18.34	19.0976	19.142	18.2926	17.9805	17.9388	18.0811	3			0.993245	0.00567671	79.565	59.726	79.565	0.52876	106400000	439	3148140	4286.2	0	264230	0	0	99611	0
	0.196593	0.0167351	+	2.52519	-0.200654	+	2.45455	-0.217389	P55081	52	P55081	P55081	Microfibrillar-associated protein 1	MFAP1	S						KRYVSGKRPDYAPMESSDEEDEEFQFIKKAK	19.749	19.817	19.7939	19.5425	19.6248	19.5906	19.7637	19.8521	19.7944	4			1	7.22e-14	173.05	160.59	167	0.27764	1786900000	52	7927770	14912	0	681360	0	0	635850	0
	0.0638705	0.0787423	+	0.842792	0.922678	+	1.40816	0.843936	Q8WWY3	440	Q8WWY3	Q8WWY3	U4/U6 small nuclear ribonucleoprotein Prp31	PRPF31	T						QRTLQKQSVVYGGKSTIRDRSSGTASSVAFT	18.3562	17.068	18.34	19.0976	19.142	18.2926	17.9805	17.9388	18.0811	3			0.993295	0.00567671	79.565	59.726	79.565	0.52876	106400000	440	3148140	4286.2	0	264230	0	0	99611	0
	0.10901	-0.0116552	+	2.45595	-0.221401	+	2.79578	-0.209746	Q8TAD8	52	Q8TAD8	Q8TAD8	Smad nuclear-interacting protein 1	SNIP1	S						EVAPPAHRRPDHSGGSPSPPTSEPARSGHRG	17.8035	17.7063	17.7996	17.5809	17.526	17.5383	17.7695	17.7892	17.7157	3			0.987205	7.08e-08	141.53	121.44	141.53	0.2682	774620000	52	1932170	4679.14	80337	38094	63002	62385	37100	53695
	0.107106	0.0161235	+	3.23777	-0.522846	+	3.65341	-0.538969	Q8TAP8	52	Q8TAP8	Q8TAP8	Protein phosphatase 1 regulatory subunit 35	PPP1R35	S			yes	yes		VPEPGLDLSLSPRPDSPQPRHGSPGRRKGRA	20.1572	20.0136	20.0386	19.5897	19.5583	19.4929	20.1336	20.0977	20.0265	3			1	4.41e-47	286.42	264.18	95.823	1.1948	1819700000	52	8981140	5465.69	877680	21741	0	707320	18630	0
	0.269513	0.0955858	+	1.35019	-0.283191	+	1.37846	-0.378777	Q9BXK1	52	Q9BXK1	Q9BXK1	Krueppel-like factor 16	KLF16	S						PAAGLDVRAARREAASPGTPGPPPPPPAASG	15.743	15.5223	15.7856	15.2931	15.439	15.4691	15.5993	15.7419	15.9964	4			0.811701	1.51e-06	94.987	85.104	94.987	0.61246	108980000	52	464905	2171.7	44680	0	0	35128	0	0
+	1.93739	-0.521825	+	2.90502	1.31068	+	3.59657	1.8325	Q8WX93	893	Q8WX93	Q8WX93	Palladin	PALLD	S				yes		PAGFPKKASRTARIASDEEIQGTKDAVIQDL	20.0044	19.85	19.6791	20.9743	21.0815	21.4097	19.3921	19.1793	19.3967	2			1	2.46e-12	198.29	168.36	198.29	-0.17792	1699900000	893	12600400	0	810620	0	0	650160	0	0
	0.0115478	0.00238864	+	1.93374	-0.290989	+	2.46262	-0.293378	Q9Y4H2	520	Q9Y4H2	Q9Y4H2	Insulin receptor substrate 2	IRS2	T				yes		SSPGDLRAFCSHRSNTPESIAETPPARDGGG	18.046	17.9283	17.8453	17.6225	17.711	17.6131	17.8957	18.0122	17.9189	2			0.973409	0.000390976	131.61	111.97	74.296	-1.9541	381210000	520	2144290	5844.4	156790	57193	0	133350	44568	0
	0.19679	-0.0359726	+	1.3925	-0.370714	+	1.43151	-0.334742	O75164	522	O75164	O75164	Lysine-specific demethylase 4A	KDM4A	S				yes		KSSSSLGSGSSRDSISSDSETSEPLSCRAQG	16.6869	16.5007	16.7048	16.2854	16.4291	16.0658	16.543	16.6168	16.6246	2			0.970868	1.4e-21	235.71	210.57	235.71	0.44891	130670000	522	841488	881.81	84904	0	0	67945	0	0
	1.03183	0.17143	+	1.79968	-0.269261	+	2.33118	-0.440691	Q9NPI6	523	Q9NPI6	Q9NPI6	mRNA-decapping enzyme 1A	DCP1A	S						QQTVTRSSDLERKASSPSPLTIGTPESQRKP	17.7393	17.6233	17.5781	17.292	17.4528	17.388	17.809	17.7167	17.9292	3			0.751997	0.000162204	123.14	106.61	87.062	-0.58063	486430000	523	1842160	0	173680	0	0	144850	0	0
	0.0765035	-0.0172869	+	2.07754	-0.326394	+	1.73684	-0.309107	Q9UPQ0	523	Q9UPQ0	Q9UPQ0	LIM and calponin homology domains-containing protein 1	LIMCH1	S				yes		ARASVLDTSMSAGSGSPSKTVTPKAVPMLTP	20.1031	20.1855	20.023	19.7108	19.8714	19.7502	19.9765	20.0846	20.1987	2			0.99493	9.95e-59	309.37	273.08	221.37	-0.20935	1364000000	523	9522580	41125	866910	0	0	815220	0	0
	0.164464	0.0629826	+	2.34765	-0.694958	+	2.30653	-0.757941	Q16584	524	Q16584	Q16584	Mitogen-activated protein kinase kinase kinase 11	MAP3K11	S						GLDRRRNVFEVGPGDSPTFPRFRAIQLEPAE	15.7902	15.6622	15.4718	15.0838	14.9392	14.8163	15.8933	15.7095	15.5103	2			0.971142	7.15e-19	242.67	216.14	242.67	-0.26486	53430000	524	408085	0	46135	0	0	38601	0	0
	1.45094	0.538902	+	5.09505	3.07482	+	4.09789	2.53592	Q8WXE0	471	Q8WXE0	Q8WXE0	Caskin-2	CASKIN2	S						SLADNLSHRPLANCRSGEQIFTQDVRPEQLL	13.3881	13.6549	13.6737	16.5866	16.7459	16.6087	14.3997	13.9303	14.0034	3			0.999997	6.2e-06	118.57	101.77	118.57	-0.14355	62259000	471	428613	0	9006	0	0	9972.3	0	0
	0.524354	0.10508	+	1.5533	-0.322185	+	2.16135	-0.427265	Q9NPI6	525	Q9NPI6	Q9NPI6	mRNA-decapping enzyme 1A	DCP1A	S						TVTRSSDLERKASSPSPLTIGTPESQRKPSI	17.597	17.398	17.6197	17.2574	17.3012	17.0895	17.749	17.5967	17.5842	3			0.918641	1.49e-05	123.14	106.61	121.25	-0.463	156770000	525	1666010	6185.4	157660	0	0	124430	0	0
	0.0440917	0.00629552	+	2.81325	0.48871	+	2.51614	0.482415	Q8WXG6	813	Q8WXG6	Q8WXG6	MAP kinase-activating death domain protein	MADD	S						QHVSGNRAQKLLRPNSLRLASDSDAESDSRA	16.8643	16.8955	16.9312	17.4959	17.3741	17.2872	16.9916	16.8719	16.8464	3			1	0.00281062	115.7	90.845	115.7	-0.14615	99377000	813	1280060	3036.2	95793	0	0	88670	0	0
	1.36108	-0.283649	+	2.73658	-0.768782	+	2.92248	-0.485133	Q6PKG0	526	Q6PKG0	Q6PKG0	La-related protein 1	LARP1	T				yes		YQKETESAPGSPRAVTPVPTKTEEVSNLKTL	20.46	20.761	20.5189	19.9062	19.79	19.7374	20.3187	20.3363	20.234	2			0.999908	3.55e-07	164.98	132.64	160.27	0.5712	635840000	526	11187300	5682.8	1105100	0	0	1201700	0	0
	0.0915518	0.0462599	+	1.74422	0.650695	+	2.12338	0.604435	Q8WXX5	109	Q8WXX5	Q8WXX5	DnaJ homolog subfamily C member 9	DNAJC9	S						DRDWEAYWRLLFKKISLEDIQAFEKTYKGSE	13.511	13.0145	13.4126	13.9817	14.0788	13.8296	13.5253	13.3618	13.1897	2			1	0.00651916	63.185	25.232	63.185	2.6074	0	109	112865	0	9790.4	0	0	6475.3	0	0
	0.444458	-0.127338	+	1.62827	0.579071	+	2.13312	0.706409	Q8WY36	159	Q8WY36	Q8WY36	HMG box transcription factor BBX	BBX	S						NPGYKWCPTTNKPVKSPTPTVNPRKKLWAFP	19.0952	18.89	18.7346	19.2878	19.4536	19.7157	18.6564	18.8032	18.8783	4			0.828616	5.47e-05	104.41	82.799	104.41	-1.0675	386150000	159	5228150	6649.1	436810	0	0	340320	0	0
	0.757205	-0.118837	+	2.32705	-0.420782	+	2.38592	-0.301945	Q9Y4H2	527	Q9Y4H2	Q9Y4H2	Insulin receptor substrate 2	IRS2	T				yes		AFCSHRSNTPESIAETPPARDGGGGGEFYGY	17.9487	17.7553	17.7614	17.4572	17.3288	17.4169	17.7371	17.7374	17.6344	2			0.999994	6.11e-14	220.93	194.57	220.93	0.50882	236670000	527	1856970	0	143080	57193	0	113770	44568	0
	0.0146823	0.00691477	+	1.23617	-0.480509	+	1.76537	-0.487424	Q5TCX8	528	Q5TCX8	Q5TCX8	Mitogen-activated protein kinase kinase kinase MLK4	MLK4	S						ISLPSDFQHKITVQASPNLDKRRSLNSSSSS	16.013	16.0749	16.4766	15.9118	15.5322	15.679	16.2224	16.2766	16.0863	4			0.999901	0.019504	58.98	39.586	58.98	0.19528	51258000	528	620815	3918.1	53689	0	0	50989	0	0
	1.22962	-0.2058	+	2.26166	0.426718	+	3.5524	0.632518	Q92538	1784	Q92538	Q92538	Golgi-specific brefeldin A-resistance guanine nucleotide exchange factor 1	GBF1	S						EKPESPRAASSSSPGSPVASSPSRLSPTPDG	17.7684	17.5349	17.6943	18.1139	18.0207	18.1431	17.5215	17.391	17.4677	2			0.999607	5.19e-29	258.14	221	215.98	0.12925	258990000	1784	2052720	1386.5	95295	81863	0	75980	60488	0
	0.0151351	-0.00372505	+	1.84017	-0.410583	+	2.24373	-0.406858	Q6WKZ4	529	Q6WKZ4	Q6WKZ4	Rab11 family-interacting protein 1	RAB11FIP1	S						EAEPESKSEPRPPISSPRAPQTRAVKPRLEV	18.3608	18.3508	18.1352	17.9572	17.7402	17.9177	18.3389	18.2173	18.2794	3			0.857247	4.69e-05	108.71	70.685	71.513	-0.0107	112110000	529	2647480	7361.6	265060	0	0	236570	0	0
	0.234237	-0.060709	+	1.9882	-0.474545	+	3.67541	-0.413836	Q9BST9	529	Q9BST9	Q9BST9	Rhotekin	RTKN	S						GRPRTFSLDAVPPDHSPRARSVAPLPPQRSP	16.7515	16.4112	16.5205	16.1341	16.0406	16.0849	16.5104	16.5244	16.4663	3			1	0.00117748	87.554	71.435	87.554	-0.21765	27509000	529	779452	980.17	0	88716	0	0	63968	0
	0.74047	0.18484	+	2.9102	-0.842321	+	3.25254	-1.02716	Q9C0B5	529	Q9C0B5	Q9C0B5	Palmitoyltransferase ZDHHC5	ZDHHC5	S				yes		RHPRLVPTGPTHREPSPVRYDNLSRHIVASL	17.2776	17.3432	17.0729	16.323	16.516	16.3277	17.5413	17.2658	17.4411	4			0.999945	3.07e-07	120.08	99.074	120.08	-0.17998	341190000	529	1244350	0	126880	0	0	119920	0	0
	0.13929	-0.0345357	+	1.7021	0.278261	+	2.24949	0.312796	Q92547	888	Q92547	Q92547	DNA topoisomerase 2-binding protein 1	TOPBP1	S						LALANSSRNAVALSASPQLKEAQSEKEEAPK	18.7969	18.6121	18.5565	18.9304	18.9101	18.9597	18.6758	18.6773	18.5088	2			0.99579	0.000124913	138.05	95.305	138.05	-0.17141	254220000	888	4036260	0	356590	0	0	282150	0	0
	0.196593	0.0167351	+	2.52519	-0.200654	+	2.45455	-0.217389	P55081	53	P55081	P55081	Microfibrillar-associated protein 1	MFAP1	S						RYVSGKRPDYAPMESSDEEDEEFQFIKKAKE	19.749	19.817	19.7939	19.5425	19.6248	19.5906	19.7637	19.8521	19.7944	4			1	7.22e-14	173.05	160.59	173.05	0.26926	1786900000	53	7927770	14912	0	681360	0	0	635850	0
	0.246248	-0.0288143	+	2.96555	-0.459384	+	2.61737	-0.430569	Q9H0W8	53	Q9H0W8	Q9H0W8	Protein SMG9	SMG9	S						ERDYIAPWERERRDASEETSTSVMQKTPIIL	18.3228	18.404	18.3744	17.8214	17.9912	17.9105	18.3158	18.4155	18.2835	3			0.999939	9.5e-10	190.67	145.86	190.67	-0.45363	166200000	53	2757650	1782.1	258310	0	0	245210	0	0
	0.383746	0.182053	+	1.78557	1.10278	+	2.05221	0.920723	Q92614	1067	Q92614	Q92614	Unconventional myosin-XVIIIa	MYO18A	S			yes			EGWAGEPRSASSRRVSSSSELDLPSGDHCEA	15.7283	15.2547	15.9255	16.8599	16.3617	16.9952	15.8471	15.8084	15.7991	4			0.777187	8.06e-27	199.36	186.71	199.36	-0.69742	228690000	1067	697056	1481.7	32957	11277	0	24757	4570.7	0
	1.5726	-0.232313	+	2.64748	0.946228	+	2.92117	1.17854	Q92615	568	Q92615	Q92615	La-related protein 4B	LARP4B	S				yes		RLSSLIIGPSKERTLSADASVNTLPVVVSRE	15.2346	15.1405	15.2569	15.934	16.1479	16.3888	15.091	14.9443	14.8998	2			0.998811	2.04e-11	199.41	164.72	139.29	-1.0012	225980000	568	448073	0	31620	0	0	27155	0	0
	1.49938	0.395614	+	2.46196	-0.775181	+	5.60297	-1.1708	Q8N3V7	536	Q8N3V7	Q8N3V7	Synaptopodin	SYNPO	S			yes			LPDRSPRPQRHIMSRSPMVERRMMGQRSPAS	14.8754	14.7349	14.4605	13.9718	13.8934	13.8801	15.0763	15.1023	15.079	4			0.820181	0.000933945	105	68.665	105	-0.10515	35179000	536	231699	664.57	24764	0	0	20657	0	0
	0.0173317	0.00536537	+	1.54104	-0.271393	+	1.92039	-0.276759	Q03188	538	Q03188	Q03188	Centromere protein C	CENPC	S						ISRRPSDWWVVKSEESPVYSNSSVRNELPMH	16.2803	16.516	16.266	16.0851	16.0736	16.0894	16.3316	16.4802	16.2666	2			0.99992	1.19e-29	289.67	250.45	289.67	0.2072	99074000	538	715214	0	64386	0	0	68649	0	0
	0.90152	-0.32961	+	1.39796	0.537646	+	2.71142	0.867256	Q92667	151	Q92667	Q92667	A-kinase anchor protein 1, mitochondrial	AKAP1	S			yes	yes		TGGEAKSIPLECPLSSPKGVLFSSKSAEVCK	17.9823	17.5948	17.4753	18.1904	18.078	18.397	17.2711	17.2877	17.5048	3			0.997653	2.1e-24	236.04	216.5	236.04	-0.4318	194090000	151	2112770	0	204910	0	0	142100	0	0
	1.22585	-0.237319	+	2.56002	0.841164	+	3.22156	1.07848	Q92841	64	Q92841	Q92841	Probable ATP-dependent RNA helicase DDX17	DDX17	S						PPPSVVTRPEPQALPSPAIRAPLPDLYPFGT	16.5368	16.6108	16.3449	17.262	17.2166	17.5373	16.3055	16.3041	16.1709	3			0.999906	1.88e-09	126.45	114.24	126.45	0.17225	1165200000	64	1047260	0	76663	0	0	73184	0	0
	0.677386	0.187214	+	0.945382	-0.530163	+	1.2995	-0.717377	Q96D71	540	Q96D71	Q96D71	RalBP1-associated Eps domain-containing protein 1	REPS1	S						QIGSNVTRQRSHSGTSPDNTAPPPPPPRPQP	13.6446	13.939	13.9121	13.2738	12.8921	13.7393	13.8565	14.1313	14.0695	4			0.836572	0.000214289	92.865	69.349	92.865	-0.10745	76255000	540	126144	0	0	10722	0	0	12078	0
	0.501994	0.0583579	+	3.25865	-0.780451	+	3.59106	-0.838809	Q9H4G0	540	Q9H4G0	Q9H4G0	Band 4.1-like protein 1	EPB41L1	S			yes			LIHRDRDWERERRLPSSPASPSPKGTPEKAN	20.9285	20.8386	20.7761	20.1349	20.1272	19.9397	20.9263	20.9356	20.8563	3			0.775898	0.000235246	123.08	106.7	107.69	0.26853	487990000	540	14875400	37984	1519800	0	0	1266200	0	0
	1.19916	0.274291	+	4.29955	2.10522	+	4.13781	1.83093	Q92890	299	Q92890	Q92890	Ubiquitin fusion degradation protein 1 homolog	UFD1L	S						DEAGGRFVAFSGEGQSLRKKGRKP_______	13.349	13.1195	13.3667	15.4965	15.4283	15.226	13.6952	13.4612	13.5017	2			0.999988	0.000123251	138.28	71.889	138.28	0.36662	32000000	299	204596	0	8769.9	0	0	6950.2	0	0
	0.12076	-0.118115	+	0.989286	0.758949	+	2.35499	0.877064	Q92900	1127	Q92900	Q92900	Regulator of nonsense transcripts 1	UPF1	S				yes		YQGERAYQHGGVTGLSQY_____________	17.7053	16.6062	17.5379	18.2045	18.094	17.8279	17.3346	16.9815	17.1791	2			0.999801	0.000270562	116.06	99.626	116.06	0.38152	164340000	1127	1815550	4842.2	169720	0	0	72961	0	0
	0.0525785	0.0148296	+	2.95834	-0.788907	+	4.35622	-0.803737	Q9BST9	543	Q9BST9	Q9BST9	Rhotekin	RTKN	S				yes		HSPRARSVAPLPPQRSPRTRGLCSKGQPRTW	17.783	17.5642	17.478	16.8276	16.8567	16.7741	17.6409	17.5569	17.6719	3			1	0.000128399	130.06	89.991	130.06	0.90075	107630000	543	1549420	3128.7	178930	0	0	139190	0	0
	1.8008	0.245922	+	3.90309	0.968475	+	4.41843	0.722553	Q92974	143	Q92974	Q92974	Rho guanine nucleotide exchange factor 2	ARHGEF2	S						DSFRQSLLGSRRGRSSLSLAKSVSTTNIAGH	16.2752	16.3379	16.1409	17.1987	17.2811	17.1797	16.535	16.4813	16.4755	2			0.819649	0.00282235	128.86	58.525	128.86	0.079589	60156000	143	1007210	2313.8	64163	0	0	60886	0	0
	0.0113434	-0.00517527	+	1.39005	-0.409543	+	2.49467	-0.404367	O95757	545	O95757	O95757	Heat shock 70 kDa protein 4L	HSPA4L	T				yes		QVDQEEGHQKCHAEHTPEEEIDHTGAKTKSA	17.638	17.6369	17.2269	17.099	17.0663	17.1078	17.3721	17.5768	17.5373	4			1	1.43e-28	252.55	227.95	252.55	0.59058	82207000	545	1536140	4119.6	162120	0	0	146180	0	0
	0.530985	-0.0542946	+	3.35984	-0.752582	+	3.43137	-0.698287	Q9P206	545	Q9P206	Q9P206	Uncharacterized protein KIAA1522	KIAA1522	S				yes		GTPTLPPKGLAGPPASPGKAQPPKPERVTSL	20.2853	20.2911	20.1708	19.4297	19.6134	19.4463	20.2021	20.1531	20.2291	4			1	6.12e-06	128.41	77.446	120.33	-0.20842	579350000	545	9521070	3985.3	981290	0	0	875330	0	0
	0.0387286	-0.0104173	+	1.42244	-0.853268	+	1.40905	-0.842851	Q8TEH3	546	Q8TEH3	Q8TEH3	DENN domain-containing protein 1A	DENND1A	S						RTLRESDSAEGDEAESPEQQVRKSTGPVPAP	14.5644	14.6257	14.785	14.0342	14.1167	13.2645	14.6027	14.568	14.7732	2			1	3.3e-06	128.9	109.06	128.9	-0.38777	44987000	546	197732	0	20044	0	0	19190	0	0
	0.958857	0.267663	+	3.13241	1.14839	+	2.65472	0.880723	Q969V6	333	Q969V6	Q969V6	MKL/myocardin-like protein 1	MKL1	S						SSSGAPGPCGLARQNSTSLTGKPGALPANLD	14.9592	15	14.7107	15.9169	16.1988	15.9993	14.9886	15.3149	15.1693	3			0.918072	4.07e-07	114.2	98.259	114.2	0.15486	65397000	333	420035	1383.1	26216	0	0	24700	0	0
	0.151913	-0.0514399	+	2.15965	-0.710365	+	2.68269	-0.658925	Q7L590	548	Q7L590	Q7L590	Protein MCM10 homolog	MCM10	S						LKQHLAKATASGIMGSPKPAIKSISASALLK	18.0396	18.224	17.8244	17.2338	17.4733	17.2498	17.9144	18.0795	17.9397	3			0.998056	0.0090216	65.105	51.442	65.105	0.82601	112910000	548	2055090	0	213050	0	0	217190	0	0
	0.0341928	0.00379562	+	1.99242	-0.215032	+	2.3354	-0.218828	P08670	55	P08670	P08670	Vimentin	VIM	S						LGSALRPSTSRSLYASSPGGVYATRSSAVRL	22.2811	22.1681	22.2145	22.0426	21.9391	22.0369	22.2259	22.193	22.2563	2			0.904063	2.05e-38	312.67	254.63	212.46	0.10665	21222000000	55	42839800	159010	3813300	0	0	3103600	0	0
	1.3006	0.272335	+	1.69459	-0.527261	+	2.63683	-0.799596	Q99700	554	Q99700	Q99700	Ataxin-2	ATXN2	S						SGSDQRVVNGGVPWPSPCPSPSSRPPSRYQS	16.2851	16.0329	16.3169	15.7413	15.8379	15.4739	16.5418	16.5014	16.4085	3			0.999655	4.65e-07	112.99	92.734	112.99	0.72836	47332000	554	667870	0	0	64596	0	0	49563	0
	0.12091	-0.0894849	+	1.19458	-0.763585	+	1.26345	-0.6741	Q9Y618	554	Q9Y618	Q9Y618	Nuclear receptor corepressor 2	NCOR2	S						ENDKEDLLKEKTDDTSGEDNDEKEAVASKGR	15.3534	16.0326	15.3669	14.5087	14.7597	15.1936	15.2192	15.7376	15.5275	3			0.844213	1.35e-05	112.85	91.251	112.85	0.10085	44261000	554	376426	760.16	34278	0	0	49554	0	0
	0.460751	-0.129358	+	2.79011	-0.959542	+	2.27434	-0.830183	P19532	556	P19532	P19532	Transcription factor E3	TFE3	S						LSPLRAASDPLLSSVSPAVSKASSRRSSFSM	17.0021	17.0798	16.8642	15.8199	16.1968	16.0508	16.6496	16.919	16.9895	2			0.909883	1.28e-05	139.58	110.62	139.58	-0.064884	63981000	556	937386	3145.1	105200	0	0	100410	0	0
	1.47156	-0.343236	+	2.60333	0.94696	+	2.78875	1.2902	Q969V6	511	Q969V6	Q969V6	MKL/myocardin-like protein 1	MKL1	S						ILVKEEGPRAGSCCLSPGGRAELEGRDKDQM	15.5085	15.3932	15.4299	16.3648	16.1696	16.638	15.2962	14.9486	15.057	2			0.999962	0.000287511	129.04	96.176	129.04	-0.55063	74638000	511	518157	0	38091	0	0	32198	0	0
	0.413359	0.10413	+	3.82159	1.45438	+	4.48517	1.35025	Q96A57	24	Q96A57	Q96A57	Transmembrane protein 230	TMEM230	S				yes		ATGIPSSKVKYSRLSSTDDGYIDLQFKKTPP	16.3805	16.0719	16.3233	17.7777	17.7282	17.6331	16.4561	16.2855	16.3465	2			0.890411	2.9e-09	182.33	156.67	182.33	-0.14722	115950000	24	1190450	1621.9	68934	0	0	50888	0	0
	1.3006	0.272335	+	1.69459	-0.527261	+	2.63683	-0.799596	Q99700	558	Q99700	Q99700	Ataxin-2	ATXN2	S						QRVVNGGVPWPSPCPSPSSRPPSRYQSGPNS	16.2851	16.0329	16.3169	15.7413	15.8379	15.4739	16.5418	16.5014	16.4085	3			0.862425	4.65e-07	112.99	92.734	112.99	0.72836	47332000	558	667870	0	0	64596	0	0	49563	0
+	1.90701	0.860107	+	2.8241	1.55284	+	3.33649	0.692729	Q96AT1	146	Q96AT1	Q96AT1	Uncharacterized protein KIAA1143	KIAA1143	S						VKKNSQKQIKNSSLLSFDNEDENE_______	14.2361	14.464	14.8982	16.1625	15.9914	16.1029	15.3938	15.4662	15.3186	2			0.994633	0.000400277	106.14	98.327	106.14	0.092799	24377000	146	433905	941.1	16032	0	0	17208	0	0
	1.5109	0.617347	+	3.46658	1.76463	+	2.63505	1.14728	Q96BD0	43	Q96BD0	Q96BD0	Solute carrier organic anion transporter family member 4A1	SLCO4A1	S						PPSRRASPGTPLSPGSLRSAAHSPLDTSKQP	17.0454	16.672	16.659	18.5394	18.7201	18.4108	17.4836	17.1384	17.6065	2			1	3.91e-22	247.79	191.98	247.79	0.50081	264130000	43	2149870	0	108350	0	0	76269	0	0
	0.825208	0.155354	+	2.13936	-0.329943	+	2.59926	-0.485297	O94916	561	O94916	O94916	Nuclear factor of activated T-cells 5	NFAT5	S						AAAGALNVNVKKEISSPARPCSFEEAMKAMK	19.1033	19.1029	18.9293	18.7299	18.7588	18.6569	19.1234	19.3302	19.148	3			0.911405	4.34e-15	205.68	174.71	205.68	-0.13774	372650000	561	4769060	2606.6	439200	0	0	392850	0	0
	0.117271	-0.0378714	+	2.30909	1.30436	+	2.53706	1.34223	Q96BH1	450	Q96BH1	Q96BH1	E3 ubiquitin-protein ligase RNF25	RNF25	S						LPRGQGAYRPGTRRESLGLESKDGS______	15.5527	15.3793	15.1676	16.5513	16.3941	17.0673	15.2844	15.2984	15.4032	3			1	0.000162491	127.97	104.51	127.97	0.38286	19873000	450	601801	1222.3	39254	0	0	31899	0	0
	0.0422174	-0.007569	+	4.63073	-0.836533	+	3.73909	-0.828964	Q5T5Y3	563	Q5T5Y3	Q5T5Y3	Calmodulin-regulated spectrin-associated protein 1	CAMSAP1	S				yes		ADVVPQQADPEFPRASPRALGLTANARSPQG	18.1702	18.1025	18.0889	17.2345	17.2877	17.3298	18.0333	18.2202	18.0854	3			1	7.67e-13	189.62	170.33	189.62	-0.11213	241930000	563	2179310	2606.4	232830	0	0	200100	0	0
	2.12662	-0.172951	+	4.00189	0.680059	+	4.61545	0.85301	Q96BY7	497	Q96BY7	Q96BY7	Autophagy-related protein 2 homolog B	ATG2B	S				yes		HPTPLQKTSLPSRSVSVDESRPELIFRLAVG	16.52	16.5996	16.5088	17.1579	17.2663	17.2444	16.3606	16.4072	16.3417	3			0.865752	3.5e-05	142.54	112.77	139.49	0.04035	112030000	497	1025610	0	75791	0	0	72631	0	0
+	3.01131	0.977979	+	4.20162	2.09767	+	4.40415	1.11969	Q96BZ8	59	Q96BZ8	Q96BZ8	Leukocyte receptor cluster member 1	LENG1	S						EARTEFLRKKARHQNSLPELEAAEAGAPGSG	14.4272	14.2545	14.6326	16.6031	16.5651	16.4391	15.4574	15.3626	15.4282	3			1	7.85e-08	124.25	101.53	124.25	0.15739	213830000	59	513325	0	18257	0	0	14941	0	0
	0.1452	0.0257498	+	2.52811	0.539359	+	2.72388	0.513609	Q96CF2	214	Q96CF2	Q96CF2	Charged multivesicular body protein 4c	CHMP4C	S						RKPGMSSTARRSRAASSQRAEEEDDDIKQLA	17.1249	16.9424	16.9739	17.4879	17.495	17.6764	17.0446	17.0959	16.978	3			0.993456	5.11e-14	170.11	145.66	170.11	-0.64319	138310000	214	1420700	827.94	114370	0	0	91518	0	0
	0.226061	-0.0778758	+	1.91562	1.02826	+	2.2668	1.10614	Q96CV9	526	Q96CV9	Q96CV9	Optineurin	OPTN	S				yes		RQSLMEMQSRHGARTSDSDQQAYLVQRGAED	15.3517	14.9486	14.9843	16.0599	15.8161	16.4935	15.0863	15.0147	14.95	3			0.774137	2.33e-07	158.89	135.22	134.33	0.30188	211940000	526	441938	0	34241	0	0	23858	0	0
	0.855582	-0.130218	+	2.75603	-0.661715	+	2.46069	-0.531497	Q9P2B4	568	Q9P2B4	Q9P2B4	CTTNBP2 N-terminal-like protein	CTTNBP2NL	S				yes		GKVSSPLSPLSPGIKSPTIPRAERGNPPPIP	20.8304	20.8909	20.7113	20.2741	20.148	20.0255	20.7702	20.6613	20.6105	3			0.962948	6.3e-63	337.33	314.68	337.33	0.092515	1969600000	568	14022500	51750	1404500	17235	0	1296800	14933	0
	0.63186	0.0884425	+	1.64764	-0.351532	+	2.02966	-0.439974	P00519	569	P00519	P00519	Tyrosine-protein kinase ABL1	ABL1	S						KGQGESDPLDHEPAVSPLLPRKERGPPEGGL	16.6636	16.5552	16.7198	16.4491	16.1582	16.2766	16.8128	16.7142	16.6769	3			1	3.69e-08	136.71	120.77	136.71	0.19077	262730000	569	885335	1009.1	83563	0	0	70487	0	0
	0.765991	0.253357	+	2.44501	0.773508	+	2.24722	0.520152	Q96EY5	202	Q96EY5	Q96EY5	Multivesicular body subunit 12A	MVB12A	S						ASRLGSRASTLRRNDSIYEASSLYGISAMDG	11.8779	12.2553	12.2325	12.8933	12.8417	12.9511	12.2755	12.2936	12.5566	3			0.853838	1.89e-07	109.26	83.645	109.26	0.092429	17240000	202	53633.5	0	3224.4	0	0	3880.8	0	0
	0.993985	-0.201289	+	3.06663	0.932909	+	4.23311	1.1342	Q96FF9	75	Q96FF9	Q96FF9	Sororin	CDCA5	S						LKRIVAHAVEVPAVQSPRRSPRISFFLEKEN	18.2727	17.9658	18.0979	19.0109	18.973	19.1512	17.9468	17.844	17.9417	3			1	1.52e-14	206.45	183.03	62.999	-1.5333	248150000	75	3348500	0	249650	0	0	182480	0	0
+	2.12078	0.57754	+	3.6257	1.24771	+	2.8766	0.67017	Q96FT9	78	Q96FT9	Q96FT9	Intraflagellar transport protein 43 homolog	IFT43	S				yes		WAGDSVKASKFRRKASEEIEDFRLRPQSLNG	18.8011	19.0432	18.7496	20.0323	20.1765	20.1282	19.314	19.5644	19.4482	3			1	0.000450827	120.24	86.936	120.24	0.40638	269420000	78	7392900	16221	357610	0	0	377340	0	0
	0.0206993	0.00661087	+	1.9541	-0.649186	+	2.1489	-0.655797	Q09666	5739	Q09666	Q09666	Neuroblast differentiation-associated protein AHNAK	AHNAK	S						GKGGVTGSPEASISGSKGDLKSSKASLGSLE	19.9617	19.7699	19.6575	19.0969	19.3668	18.9778	19.7322	19.7573	19.9194	4			0.96173	9.32e-17	191.4	142.11	191.4	0.44924	221740000	5739	7229080	12046.6	46692	740760	0	31748	584160	0
	0.793564	0.13894	+	3.1365	0.831531	+	3.53816	0.692591	Q96GN5	139	Q96GN5	Q96GN5	Cell division cycle-associated 7-like protein	CDCA7L	S						EEDKATPRRSRSRRSSIGLRVAFQFPTKKLA	11.6659	11.8834	11.8939	12.6708	12.5515	12.7155	12.002	11.8934	11.9646	3			0.893657	0.0409755	56.432	25.358	56.432	-0.19611	7756900	139	43015.8	0	2791.5	0	0	3020.2	0	0
	0.561198	-0.198528	+	2.60699	-1.32746	+	2.47955	-1.12893	Q09666	5782	Q09666	Q09666	Neuroblast differentiation-associated protein AHNAK	AHNAK	S				yes		KFSLFKSKKPRHRSNSFSDEREFSGPSTPTG	19.4474	19.8672	19.5861	18.5357	18.3638	18.0188	19.5427	19.5207	19.2416	2			0.926664	3.88e-06	167.11	124.05	167.11	0.53669	226180000	5782	5438440	1594.8	555000	0	0	657700	0	0
	0.89809	0.190098	+	3.97104	1.58764	+	5.40113	1.39754	Q96IZ0	231	Q96IZ0	Q96IZ0	PRKC apoptosis WT1 regulator protein	PAWR	S						QEPPRTVSGRYKSTTSVSEEDVSSRYSRTDR	18.0788	17.7722	17.8041	19.4646	19.4143	19.5393	18.0664	18.0519	18.1072	2			0.884324	3.09e-29	282.54	240.09	282.54	1.1391	508370000	231	3978740	6772.4	218810	0	0	160150	0	0
	0.556389	-0.0402082	+	1.83045	0.471795	+	1.9163	0.512004	Q96LD4	588	Q96LD4	Q96LD4	Tripartite motif-containing protein 47	TRIM47	S				yes		RRLKASRPRRGGIPASPIDPFQSRLDSHFAG	18.2107	18.2177	18.1726	18.5525	18.5638	18.9001	18.1102	18.2099	18.1603	3			1	8.47e-07	157.15	127.61	157.15	-0.2426	495120000	588	3149150	9846	239340	0	0	216280	0	0
	0.00671174	0.00256729	+	2.62817	0.764167	+	3.50166	0.761599	Q96N67	1383	Q96N67	Q96N67	Dedicator of cytokinesis protein 7	DOCK7	S						SCFEYKGKKVFERMNSLTFKKSKDMRAKLEE	19.7268	19.7298	19.4008	20.3909	20.4161	20.3428	19.5278	19.7388	19.5985	2			0.994107	0.00156089	130.01	97.752	113.93	0.1489	488010000	1383	9271080	16685	671180	0	0	599480	0	0
	0.163886	-0.0365524	+	3.1266	0.746245	+	4.74073	0.782797	Q96N67	182	Q96N67	Q96N67	Dedicator of cytokinesis protein 7	DOCK7	S						NSYQDDQDDLKRRSMSIDDTPRGSWACSIFD	16.3189	16.5613	16.5489	17.2284	17.1933	17.2461	16.3826	16.4621	16.4747	2			0.922344	0.00213651	132.25	93.458	132.25	0.5797	75683000	182	1030900	726.81	66103	0	0	70781	0	0
	0.425254	0.217627	+	2.40208	0.845694	+	1.36633	0.628067	Q96N67	896	Q96N67	Q96N67	Dedicator of cytokinesis protein 7	DOCK7	S						RSAVRPASLNLNRSRSLSNSNPDISGTPTSP	14.5474	14.7508	14.9075	15.3895	15.6904	15.6629	14.6011	15.2623	14.9952	3			0.851415	2.5e-22	214.95	184.94	112.75	-0.24107	124850000	896	337985	0	0	19814	0	0	20879	0
	0.559045	0.506692	+	1.28264	1.14416	+	2.27035	0.637473	Q96NU1	640	Q96NU1	Q96NU1	Sterile alpha motif domain-containing protein 11	SAMD11	S						LRAPERELGTGEQPLSPTTATSPYGGGHALA	14.3113	13.2756	14.5993	15.2491	14.9875	15.3821	14.5757	14.5764	14.5542	3			0.931304	1.41e-08	119.97	108.19	119.97	-0.25171	42633000	640	253450	0	16874	0	0	7721.6	0	0
+	2.06146	0.556336	+	3.59124	1.01681	+	1.68332	0.460478	Q96NW4	1023	Q96NW4	Q96NW4	Ankyrin repeat domain-containing protein 27	ANKRD27	T						LTQTGPGHRRMLRRHTVEDAVVSQGPEAAGP	13.0021	13.0715	13.173	14.1255	13.9726	14.1989	13.5228	13.8479	13.545	3			0.999929	1.17e-35	221.1	200.09	142.86	-0.35979	169470000	1023	121579	0	6926.3	0	0	6728.6	0	0
+	1.98415	1.84767	+	3.02434	2.76349	+	1.36497	0.915821	Q96PK6	620	Q96PK6	Q96PK6	RNA-binding protein 14	RBM14	S						DRRLAELSDYRRLSESQLSFRRSPTKSSLDY	14.5778	14.3256	15.2888	17.7384	17.4493	17.2949	16.8418	16.0085	16.8848	2			0.999995	1.48e-06	219.92	147.55	219.92	-0.020525	182610000	620	1021150	791.26	20227	0	0	15675	0	0
	1.12662	0.114084	+	4.57413	-1.00532	+	5.93477	-1.1194	Q96B97	587	Q96B97	Q96B97	SH3 domain-containing kinase-binding protein 1	SH3KBP1	S				yes		SPLSSSLGTAGHRANSPSLFGTEGKPKMEPA	20.7106	20.573	20.5854	19.602	19.647	19.6041	20.7116	20.7727	20.7269	3			0.939418	1.12e-06	168.05	146.24	168.05	0.3274	797810000	587	12502400	18743	1310400	0	0	1058600	0	0
	1.53467	-0.303439	+	2.93511	-0.706284	+	2.90065	-0.402845	O60343	588	O60343	O60343	TBC1 domain family member 4	TBC1D4	S				yes		NIFSRGANRMRGRLGSVDSFERSNSLASEKD	19.7052	19.4849	19.4444	18.862	18.7853	18.8683	19.1706	19.2379	19.3157	2			0.99904	0.000116776	182.54	86.504	120.32	0.62062	582410000	588	5506160	0	661390	0	0	508250	0	0
	0.157957	-0.0342337	+	1.56889	-0.305043	+	2.02251	-0.270809	Q14004	588	Q14004	Q14004	Cyclin-dependent kinase 13	CDK13	T						TKEESVSLKEKTKPLTPSIGAKEKEQHVALV	20.6675	20.7754	20.5169	20.3492	20.4322	20.2633	20.5623	20.6244	20.6704	3			0.89176	0.0154877	73.022	52.182	73.022	-0.21865	354800000	588	13896500	43375	1272600	0	0	1213400	0	0
	0.0212124	-0.00603676	+	1.79483	0.428195	+	1.77048	0.434232	Q96PY5	1016	Q96PY5	Q96PY5	Formin-like protein 2	FMNL2	S						KLLEQEALMEQQDPKSPSHKSKRQQQELIAE	17.5248	17.3579	17.3135	17.7435	17.7397	17.9976	17.2912	17.3606	17.5264	4			0.996533	3e-18	221.39	190.16	221.39	-0.020199	68376000	1016	1785240	2317.8	150110	0	0	121110	0	0
	0.969031	-0.127919	+	2.55026	-0.39704	+	2.80552	-0.269121	P21127	589	P21127	P21127	Cyclin-dependent kinase 11B	CDK11B	S						GILKVGDFGLAREYGSPLKAYTPVVVTLWYR	20.1376	20.3135	20.1549	19.7681	19.8483	19.7985	20.0573	20.1256	20.0394	2			1	3.5e-10	171.72	158.53	140.45	-0.2531	1174600000	589	9707080	9087	676490	211040	0	700100	188600	0
	0.0151675	0.0160033	+	1.05267	0.787638	+	1.76982	0.771635	Q96RK0	1294	Q96RK0	Q96RK0	Protein capicua homolog	CIC	S						PGQGLENRGEPPTPPSPAPAPAVAPGGSSES	12.5655	11.5736	12.5116	12.7388	13.2195	13.0553	12.3786	12.359	11.9611	2			0.842725	0.0366281	46.982	37.233	46.982	0.012337	30602000	1294	55810.6	0	5146.8	0	0	2450.7	0	0
	0.0771941	-0.0189937	+	1.54142	0.306139	+	1.43666	0.325133	Q96RK0	583	Q96RK0	Q96RK0	Protein capicua homolog	CIC	T						AGPLRPPPPGAGGPATPSKATRFLPMDPATF	14.4639	14.6322	14.5681	14.7765	14.7908	15.0153	14.4524	14.4769	14.6778	3			0.797322	9.49e-07	107.89	81.89	107.89	-0.25127	60239000	583	237389	0	18719	0	0	19274	0	0
+	1.65987	0.898878	+	1.23444	-0.63283	+	4.23896	-1.53171	O60343	591	O60343	O60343	TBC1 domain family member 4	TBC1D4	S						SRGANRMRGRLGSVDSFERSNSLASEKDYSP	13.9928	14.7574	14.6264	13.8515	13.8922	13.7343	15.3711	15.4743	15.2278	2			0.997544	0.00333051	108.35	42.293	108.35	-0.76085	29731000	591	243821	0	13588	0	0	20973	0	0
	0.0258457	0.0263316	+	1.93476	1.56249	+	2.60209	1.53616	Q96RL1	627	Q96RL1	Q96RL1	BRCA1-A complex subunit RAP80	UIMC1	S						LKNPKEKGHSEGRLLSFLEQSEHKTSDADIK	10.7588	11.1637	11.8183	13.1107	12.5069	12.8106	11.4697	10.9883	11.3617	3			0.999988	0.016419	68.83	30.802	68.83	-0.098082	2677200	627	38376.9	0	1506.2	0	0	1858.8	0	0
	0.215977	-0.1326	+	2.08392	1.1471	+	2.83762	1.2797	Q96S55	116	Q96S55	Q96S55	ATPase WRNIP1	WRNIP1	T				yes		DGGETESRESYDAPPTPSGARLIPDFPVARS	17.4355	16.8436	17.49	18.5507	18.4779	18.1817	17.242	16.8859	17.2433	2			0.997668	4e-09	197.06	170.35	197.06	0.43685	191330000	116	2032000	0	141260	0	0	85623	0	0
	0.486039	-0.0258268	+	3.59019	-0.843836	+	3.55507	-0.818009	Q8IVF2	593	Q8IVF2	Q8IVF2	Protein AHNAK2	AHNAK2	S						GQIRMPKFKIPSLGWSPSKHTKTGREKATED	19.292	19.3463	19.3444	18.4011	18.6157	18.4345	19.2845	19.2897	19.3312	3			0.99857	2.02e-08	188.27	164.81	188.27	0.39636	265710000	593	5009160	16260	499360	0	0	462920	0	0
	0.26302	-0.0506802	+	2.08323	-0.313229	+	1.921	-0.262548	P13051	60	P13051	P13051	Uracil-DNA glycosylase	UNG	T						AIPAKKAPAGQEEPGTPPSSPLSAEQLDRIQ	20.632	20.7032	20.5089	20.2415	20.3227	20.3402	20.462	20.6311	20.599	3			0.999998	4.18e-11	146.94	130.67	137.29	0.098675	5782600000	60	13463600	24273	880380	361870	0	852300	303420	0
	1.24095	-0.159055	+	2.56443	-0.389923	+	2.19243	-0.230868	Q13442	60	Q13442	Q13442	28 kDa heat- and acid-stable phosphoprotein	PDAP1	S						DGAAGDPKKEKKSLDSDESEDEEDDYQQKRK	22.7412	22.7711	22.6061	22.2999	22.3747	22.2741	22.4829	22.5861	22.5723	3			0.999988	1.36e-42	286.55	242.66	286.55	-0.074959	10076000000	60	54795400	80192	18869	5195800	0	28061	4632700	0
+	2.21771	0.595885	+	4.64276	2.50896	+	7.42484	1.91307	Q96SB3	100	Q96SB3	Q96SB3	Neurabin-2	PPP1R9B	S			yes			RASERGVRLSLPRASSLNENVDHSALLKLGT	17.7966	18.0759	17.7072	20.3623	20.3743	20.3701	18.4651	18.4235	18.4789	3			0.994683	8.35e-39	299.6	250.29	299.6	0.21242	450840000	100	6361150	8252.9	180590	0	0	196550	0	0
	0.255871	0.0773093	+	1.32729	-0.411223	+	2.06472	-0.488532	Q9HD15	60	Q9HD15	Q9HD15	Steroid receptor RNA activator 1	SRA1	S						RRSLLTKRVAAPQDGSPRVPASETSPGPPPM	14.8825	14.5149	14.8066	14.1404	14.4316	14.3984	14.892	14.7438	14.8002	3			0.995681	0.00069502	71.47	65.138	71.47	-0.55135	54816000	60	231885	0	24886	0	0	17809	0	0
	0.0100545	0.00262896	+	1.91585	0.511869	+	2.29158	0.50924	Q96TA1	641	Q96TA1	Q96TA1	Niban-like protein 1	FAM129B	S						VQDEEVGLPFEASPESPPPASPDGVTEIRGL	16.541	16.2664	16.3661	16.8628	16.7783	17.068	16.4452	16.3371	16.3991	3			0.957947	1.02e-09	115.3	103.1	108.49	0.63451	671830000	641	910725	0	58743	18137	0	43501	14515	0
	0.00507909	0.00205135	+	2.3047	0.902368	+	2.0772	0.900316	Q96TA1	646	Q96TA1	Q96TA1	Niban-like protein 1	FAM129B	S						VGLPFEASPESPPPASPDGVTEIRGLLAQGL	14.4174	14.2117	14.4041	15.0796	15.122	15.5386	14.5112	14.1266	14.4016	3			0.990747	1.15e-09	108.49	96.747	108.49	0.63451	104430000	646	252562	0	0	18137	0	0	14515	0
	1.24976	-0.0938212	+	1.44246	0.316977	+	1.83231	0.410798	Q96TA1	696	Q96TA1	Q96TA1	Niban-like protein 1	FAM129B	S						SPQPKAAPEASSPPASPLQHLLPGKAVDLGP	19.2875	19.2534	19.1884	19.4199	19.5118	19.7486	19.1891	19.1307	19.1281	3			1	4.08e-13	180.05	150.36	180.05	-0.32172	2318600000	696	6106790	11607.8	42977	454850	0	44095	390720	0
	1.45328	-0.19336	+	2.7035	-0.577623	+	2.29272	-0.384263	Q92615	601	Q92615	Q92615	La-related protein 4B	LARP4B	S				yes		VPASCAVSATYERSPSPAHLPDDPKVAEKQR	23.1842	23.3265	23.1575	22.6646	22.7393	22.5314	22.9664	23.0758	23.046	3			0.972723	8.56e-13	219.89	160.47	135.14	-0.52479	6681500000	601	74568900	140367	7025800	22508	0	6756800	20967	0
	1.00451	-0.119988	+	2.43846	0.763131	+	2.53557	0.883119	Q99081	67	Q99081	Q99081	Transcription factor 12	TCF12	S				yes		DERGGTTSWGTSGQPSPSYDSSRGFTDSPHY	15.4226	15.3887	15.3928	15.9678	16.1305	16.3952	15.3822	15.1928	15.2691	2			0.980894	9.75e-18	204.05	175.85	204.05	0.5064	181170000	67	487034	0	35929	0	0	32103	0	0
	0.110795	-0.0265392	+	1.35624	-0.510752	+	1.41545	-0.484213	Q5T5U3	605	Q5T5U3	Q5T5U3	Rho GTPase-activating protein 21	ARHGAP21	S						KTLQSNRNFQTTCGMSLPRGISQDRSPLVKV	14.3229	14.0584	14.1097	13.7059	13.8932	13.3597	14.1926	14.1334	14.0854	2			0.98623	0.00406891	88.507	65.628	88.507	0.2139	23062000	605	147762	0	17008	0	0	13090	0	0
	1.79738	0.22781	+	2.55687	0.51593	+	1.83197	0.28812	Q99501	436	Q99501	Q99501	GAS2-like protein 1	GAS2L1	S						RGAQLSVPSPARRARSQSREEQAVLLVRRDR	16.4194	16.3975	16.549	16.9326	16.8873	17.0938	16.7241	16.6214	16.7038	3			1	1.06e-09	194.51	170.03	46.387	-0.18419	249520000	436	1002890	0	16105	54671	0	15089	48289	0
	2.10883	0.232377	+	2.37044	0.608852	+	1.75182	0.376475	Q99501	438	Q99501	Q99501	GAS2-like protein 1	GAS2L1	S						AQLSVPSPARRARSQSREEQAVLLVRRDRDG	16.0398	15.9942	16.1393	16.5905	16.5541	16.8552	16.3235	16.2566	16.2903	3			1	0.0508209	46.387	26.809	46.387	-0.18419	76984000	438	785107	0	0	54671	0	0	48289	0
	0.822119	-0.219153	+	1.7059	0.58097	+	1.94441	0.800123	Q99594	145	Q99594	Q99594	Transcriptional enhancer factor TEF-5	TEAD3	S						SSAQIVSASVLQNKFSPPSPLPQAVFSTSSR	15.0293	15.2024	15.1989	15.7626	15.4594	15.9515	14.7178	15.0906	14.9647	2			0.912805	8.03e-06	133.28	92.553	133.28	0.17451	135000000	145	375824	0	27497	0	0	28312	0	0
	0.158476	0.063749	+	2.22413	0.930901	+	2.66549	0.867152	Q99959	132	Q99959	Q99959	Plakophilin-2	PKP2	S						ATYEGRWGRGTAQYSSQKSVEERSLRHPLRR	15.8016	15.5672	15.3239	16.4443	16.3402	16.701	15.75	15.563	15.5709	3			0.841517	0.000126394	108.34	66.797	108.34	0.85123	91526000	132	598463	0	46496	0	0	36208	0	0
	1.26899	0.214393	+	3.39876	1.25922	+	3.43389	1.04483	Q99959	135	Q99959	Q99959	Plakophilin-2	PKP2	S						EGRWGRGTAQYSSQKSVEERSLRHPLRRLEI	16.7234	16.9723	16.8018	18.0515	17.9619	18.2617	16.992	17.0941	17.0545	3			0.99907	1.03e-05	151.87	118.17	151.87	0.071679	230400000	135	1689190	8302.5	87032	0	0	93387	0	0
	0.324922	0.0554762	+	1.61871	-0.273528	+	1.93737	-0.329004	Q765P7	612	Q765P7	Q765P7	MTSS1-like protein	MTSS1L	S						TVPDSPGYMGPTRAGSEECVFYTDETASPLA	15.3243	15.4232	15.5031	15.0956	15.2578	15.0766	15.3779	15.5119	15.5272	3			0.999857	9.18e-08	126.59	112.55	126.59	-0.69437	26136000	612	379536	593.85	33608	0	0	32857	0	0
	0.0331933	0.0119673	+	2.27776	0.422087	+	1.62065	0.41012	Q9BR39	490	Q9BR39	Q9BR39	Junctophilin-2	JPH2	T				yes		RETPRPEGGSPSPAGTPPQPKRPRPGVSKDG	13.2922	13.0861	13.2189	13.7153	13.5788	13.5695	13.3095	13.3239	12.9998	3			0.823068	0.0463504	42.041	34.329	42.041	0.00023171	31577000	490	96189.8	0	8437.4	0	0	6795.6	0	0
	1.20919	-0.235132	+	2.84188	0.632047	+	3.82999	0.867179	Q9BRA0	22	Q9BRA0	Q9BRA0	N-alpha-acetyltransferase 38, NatC auxiliary subunit	NAA38	S						TMLLREENGCCSRRQSSSSAGDSDGEREDSA	15.2355	15.0688	14.9819	15.7889	15.6856	15.7079	14.9291	14.8957	14.756	3			0.83716	2.32e-07	121.62	85.17	83.216	0.52065	101910000	22	364323	0	6176.7	25463	0	5348.1	20526	0
	1.19334	-0.284827	+	2.30288	-0.672369	+	1.84126	-0.387542	Q07157	617	Q07157	Q07157	Tight junction protein ZO-1	TJP1	S				yes		WRFRGLRSSKRNLRKSREDLSAQPVQTKFPA	18.1909	18.4588	18.1573	17.6517	17.6856	17.4524	17.9712	18.0922	17.889	3			0.999997	5.82e-10	197.51	169.86	197.51	-0.24822	74463000	617	2293880	1962.2	236130	0	0	254440	0	0
	1.60915	-0.288443	+	3.09973	0.752052	+	5.01732	1.04049	Q9BRA0	29	Q9BRA0	Q9BRA0	N-alpha-acetyltransferase 38, NatC auxiliary subunit	NAA38	S						NGCCSRRQSSSSAGDSDGEREDSAAERARQQ	14.9162	14.7255	14.6556	15.5693	15.4812	15.503	14.4912	14.5138	14.4271	3			0.94269	0.00042331	83.216	68.364	83.216	0.52065	33792000	29	299256	0	0	25463	0	0	20526	0
	0.224566	-0.0474148	+	1.5197	0.290534	+	2.68374	0.337948	Q9BRG2	145	Q9BRG2	Q9BRG2	SH2 domain-containing protein 3A	SH2D3A	S						MDGPARIEPLRARKWSNSQPADLAHMGRSRE	16.4969	16.602	16.3321	16.6871	16.8126	16.8029	16.4091	16.4	16.4797	3			0.997772	5.29e-07	164.97	138.63	164.97	0.50133	134250000	145	887829	0	74609	0	0	72751	0	0
	0.534906	0.169386	+	2.02174	0.787618	+	1.74935	0.618231	Q9BRQ0	97	Q9BRQ0	Q9BRQ0	Pygopus homolog 2	PYGO2	S						FGAPKVGVAAPPFLGSPVPFGGFRVQGGMAG	14.1192	14.4378	14.4379	14.9593	15.0196	15.3788	14.6514	14.3382	14.5135	2			1	0.00602976	62.861	51.421	62.861	-1.6298	44349000	97	248125	0	14807	0	0	16907	0	0
	0.0918264	-0.0500507	+	1.00984	0.545539	+	1.51621	0.595589	Q9BU76	177	Q9BU76	Q9BU76	Multiple myeloma tumor-associated protein 2	MMTAG2	S						AASARRKPRAEDQTESSCESHRKSKKEKKKK	12.8574	12.7852	13.3752	13.6187	13.8108	13.2249	13.0693	12.8991	12.8992	3			0.945108	0.00973855	70.117	60.368	70.117	-0.6392	7139900	177	86939.2	0	6277	0	0	5547.5	0	0
	0.265605	0.0649217	+	1.77364	-0.522706	+	2.00077	-0.587627	Q6UUV7	62	Q6UUV7	Q6UUV7	CREB-regulated transcription coactivator 3	CRTC3	S						FQKLQQLRLTQYHGGSLPNVSQLRSSASEFQ	18.4655	18.2258	18.2719	17.9252	17.8909	17.579	18.46	18.2578	18.4402	3			0.999967	9.18e-11	196.18	148.63	196.18	0.12751	220600000	62	2706710	1041.5	284630	0	0	217440	0	0
	0.952758	-0.200342	+	2.05774	-0.628795	+	1.58006	-0.428453	P42684	620	P42684	P42684	Abelson tyrosine-protein kinase 2	ABL2	S						SLAPGFIRGAQASSGSPALPRKQRDKSPSSL	19.1835	19.067	18.9219	18.2679	18.6327	18.3855	18.7439	18.8661	18.9614	2			0.963168	1.58e-06	172.9	118.37	150.19	0.26542	506470000	620	4110460	13002	463810	0	0	383460	0	0
	0.524568	0.170348	+	3.93217	1.60646	+	3.36783	1.43611	Q9BUT9	78	Q9BUT9	Q9BUT9	Protein FAM195A	FAM195A	S				yes		GPRLVFNRVNGRRAPSTSPSFEGTQETYTVA	15.4104	15.1775	15.4436	17.0117	16.8155	17.0237	15.7416	15.3636	15.4373	4			0.960847	5.59e-34	227.15	212.22	216.54	0.36195	262960000	78	682428	0	0	35636	0	0	27841	0
	1.32702	-0.229475	+	2.64848	-0.569052	+	4.80959	-0.339577	Q9Y4H2	620	Q9Y4H2	Q9Y4H2	Insulin receptor substrate 2	IRS2	S				yes		FSGSAGRLCPSCPASSPKVAYHPYPEDYGDI	20.1374	19.9108	19.8818	19.4332	19.3968	19.3928	19.7404	19.7558	19.7453	2			0.999552	3.57e-101	361.66	338.46	234.87	-0.50017	1403700000	620	7787290	2901.6	887410	0	0	677320	0	0
	0.524568	0.170348	+	3.93217	1.60646	+	3.36783	1.43611	Q9BUT9	82	Q9BUT9	Q9BUT9	Protein FAM195A	FAM195A	S				yes		VFNRVNGRRAPSTSPSFEGTQETYTVAHEEN	15.4104	15.1775	15.4436	17.0117	16.8155	17.0237	15.7416	15.3636	15.4373	4			0.996369	5.37e-28	216.54	197.67	216.54	0.36195	262960000	82	682428	0	0	35636	0	0	27841	0
	0.762242	-0.168315	+	2.0521	-0.578101	+	1.77112	-0.409786	Q99700	624	Q99700	Q99700	Ataxin-2	ATXN2	S						STMPKRMSSEGPPRMSPKAQRHPRNHRVSAG	21.4506	21.5811	21.2895	20.8855	21.0003	20.701	21.1628	21.3008	21.3526	4			1	2.81e-06	164.97	127.42	164.97	0.27342	2149400000	624	21746900	23203	2167700	0	0	2089100	0	0
	0.877805	0.210365	+	2.50613	-0.976833	+	2.73695	-1.1872	Q9HCH0	626	Q9HCH0	Q9HCH0	Nck-associated protein 5-like	NCKAP5L	S						YGSPQEKSLDKAGSESPHPGRRTPGNSSKKP	15.7686	15.9926	15.7992	15.106	14.6339	14.8899	16.1714	16.128	15.892	4			0.947805	0.0205147	57.525	35.212	57.525	0.31416	41847000	626	475237	1105	45462	0	0	48236	0	0
+	2.30581	-0.450786	+	1.94083	0.774357	+	2.7628	1.22514	Q9BVC5	193	Q9BVC5	Q9BVC5	Ashwin	C2orf49	S				yes		THRKSPSGPVKSPPLSPVGTTPVKLKRAAPK	18.1782	18.0977	17.9367	18.66	18.712	19.1637	17.6447	17.5464	17.6692	2			0.999999	5.05e-09	181.72	111.94	181.72	0.052221	284560000	193	2971610	0	234100	0	0	199450	0	0
	0.0831692	-0.0223052	+	1.55307	0.542411	+	1.77833	0.564716	Q9BVJ6	205	Q9BVJ6	Q9BVJ6	U3 small nucleolar RNA-associated protein 14 homolog A	UTP14A	T						NLLHKNKQPVTDPLLTPVEKASLRAMSLEEA	16.3301	16.1461	16.0378	16.5203	16.644	16.977	16.0788	16.2227	16.1457	3			0.999999	8.35e-05	109.89	88.334	109.89	0.3244	19341000	205	788896	1203	66606	0	0	53499	0	0
	0.131901	-0.0391045	+	1.35201	-0.308161	+	2.47115	-0.269057	P10109	63	P10109	P10109	Adrenodoxin, mitochondrial	FDX1	S						EASRSLSVSARARSSSEDKITVHFINRDGET	17.9354	17.9315	17.6233	17.5717	17.5081	17.4859	17.7224	17.8347	17.8157	3			0.999578	2.03e-18	244.18	211.68	244.18	0.18985	359760000	63	1957190	8772.4	198480	0	0	178310	0	0
	0.985909	-0.125223	+	2.35777	-0.369155	+	2.16653	-0.243933	Q13442	63	Q13442	Q13442	28 kDa heat- and acid-stable phosphoprotein	PDAP1	S						AGDPKKEKKSLDSDESEDEEDDYQQKRKGVE	22.8648	22.91	22.7375	22.4464	22.5407	22.4178	22.6531	22.7455	22.738	3			1	1.36e-42	286.55	242.66	286.55	-0.074959	14701000000	63	60935300	176730	0	5671900	0	0	5118100	0
	0.273116	-0.059824	+	2.96879	-1.48781	+	3.1309	-1.42798	Q9C0D5	63	Q9C0D5	Q9C0D5	Protein TANC1	TANC1	S						AEDTYRVSLAKGVSMSLPSSPLLPRQSHLVQ	17.6939	17.3973	17.5952	16.2048	16.2488	15.7695	17.5103	17.5153	17.4814	2			0.99817	4.64e-09	196.18	134.04	196.18	-0.0094692	122510000	63	1326640	0	0	168410	0	0	124380	0
	0.218032	-0.0202726	+	2.48721	-0.257523	+	2.4908	-0.237251	P25440	633	P25440	P25440	Bromodomain-containing protein 2	BRD2	S						KATKTAPPALPTGYDSEEEEESRPMSYDEKR	20.1884	20.1274	20.0925	19.8518	19.8458	19.9381	20.0855	20.1608	20.1011	4			0.999999	1.93e-34	232.38	211.63	232.38	0.17882	1463800000	633	9884090	24363	918680	0	0	783850	0	0
	0.0742274	-0.0337582	+	3.93077	1.25609	+	2.84861	1.28985	Q9BWH2	151	Q9BWH2	Q9BWH2	FUN14 domain-containing protein 2	FUNDC2	S				yes		EKDMKKAKEQLKIRKSNQIPTEVRSKAEEVV	17.7623	17.5785	17.6711	18.802	18.9553	19.0227	17.7332	17.3415	17.8358	3			1	6.25e-05	141.13	99.926	141.13	-0.33986	211950000	151	2892580	8705.8	176430	0	0	140540	0	0
	1.80226	-0.274939	+	3.30857	1.33747	+	3.85019	1.61241	Q9BX66	326	Q9BX66	Q9BX66	Sorbin and SH3 domain-containing protein 1	SORBS1	S						IVLLQHNREQQKRLSSLSDPVSERRVGEQDS	14.9255	14.7757	14.9974	16.1032	16.1495	16.4583	14.6121	14.5982	14.6635	2			0.87031	0.000150051	132.86	57.475	132.86	-0.53579	17704000	326	421406	1457.5	25623	0	0	21232	0	0
	0.213252	-0.0736027	+	2.72003	0.971445	+	5.00342	1.04505	Q9BXB4	189	Q9BXB4	Q9BXB4	Oxysterol-binding protein-related protein 11	OSBPL11	S				yes		SLASSSNSPISQRRPSQNAISFFNVGHSKLQ	18.4099	18.4226	18.8096	19.4691	19.5317	19.5557	18.5164	18.423	18.482	3			0.998214	1.58e-10	190.63	164.98	190.63	0.30264	519740000	189	4711810	0	274060	0	0	248320	0	0
	0.431829	-0.0990887	+	4.99408	2.09798	+	5.40491	2.19707	Q9BXB5	209	Q9BXB5	Q9BXB5	Oxysterol-binding protein-related protein 10	OSBPL10	S						HGTPNSASPCSQRHLSVGAPGVVTITHHKSP	16.6865	16.5007	16.7539	18.7435	18.7519	18.7396	16.5183	16.4576	16.6679	4			1	0.00013882	131.11	113.41	131.11	0.30722	78828000	209	2050040	4935.4	84876	0	0	67947	0	0
	0.275002	-0.0652281	+	1.49169	-0.302629	+	2.80977	-0.237401	Q2M2I8	637	Q2M2I8	Q2M2I8	AP2-associated protein kinase 1	AAK1	S						PSSPKTQRAGHRRILSDVTHSAVFGVPASKS	20.1783	20.198	19.9126	19.7562	19.8073	19.8175	19.9916	20.0258	20.0758	3			0.998774	5.55e-30	269.51	233.78	201.61	0.25686	848870000	637	9371190	20674	912370	0	0	822060	0	0
	0.645517	-0.0670338	+	2.45834	-0.299278	+	2.15877	-0.232244	Q9NYL2	637	Q9NYL2	Q9NYL2	Mitogen-activated protein kinase kinase kinase MLT	ZAK	S				yes		IKYQQITPVNQSRSSSPTQYGLTKNFSSLHL	20.4616	20.445	20.3487	20.171	20.1293	20.0572	20.3595	20.4006	20.2941	2			0.999791	1.95e-24	279.65	212.44	279.65	0.20084	1785000000	637	11699400	0	1106300	0	0	971060	0	0
	0.415571	0.123591	+	4.87832	3.23319	+	6.0882	3.10959	Q9BXL6	12	Q9BXL6	Q9BXL6	Caspase recruitment domain-containing protein 14	CARD14	T						____MGELCRRDSALTALDEETLWEMMESHR	11.2979	11.3962	11.692	14.702	14.6233	14.7604	11.6744	11.5331	11.5494	4			0.799513	1.71e-13	162.71	132.49	162.71	-0.6564	10156000	12	104311	0	2173.3	0	0	2174.4	0	0
+	4.17119	1.43506	+	5.7399	3.07329	+	4.44641	1.63822	Q9BXL6	787	Q9BXL6	Q9BXL6	Caspase recruitment domain-containing protein 14	CARD14	S						RIVSMDKAKASPLRLSFDRGQLDPSRMEGSS	15.0699	15.2261	15.0653	18.215	18.2663	18.1	16.4464	16.6704	16.5498	3			0.820498	0.00489501	67.227	31.587	67.227	0.13226	138080000	787	1402900	0	28269	0	0	28769	0	0
	0.246776	-0.152352	+	1.83008	1.12778	+	2.43685	1.28013	Q9BXP5	136	Q9BXP5	Q9BXP5	Serrate RNA effector molecule homolog	SRRT	S						HIMQHHVLPIQARLGSIAEIDLGVPPPVMKT	13.2597	12.5402	13.0463	13.743	14.1631	14.3234	12.7663	12.6073	13.0155	2			1	0.00186777	82.651	62.559	82.651	-0.28012	10875000	136	101949	0	8252.7	0	0	4702.9	0	0
	0.517293	0.0544052	+	1.66446	-0.286126	+	2.01242	-0.340532	Q9H3Q1	64	Q9H3Q1	Q9H3Q1	Cdc42 effector protein 4	CDC42EP4	S						DTSFLNSKAGEPDGESLDEQPSSSSSKRSLL	17.7001	17.6489	17.5698	17.2443	17.3365	17.4796	17.6933	17.74	17.6487	2			0.999998	9.32e-05	103.5	76.471	103.5	-0.237	1108500000	64	1770880	2180.2	169120	0	0	147370	0	0
	0.39344	-0.159315	+	2.58118	0.909348	+	3.096	1.06866	Q9BY84;Q13202	401;395	Q9BY84	Q9BY84	Dual specificity protein phosphatase 16;Dual specificity protein phosphatase 8	DUSP16;DUSP8	S						SADRLEDSNKLKRSFSLDIKSVSYSASMAAS	17.842	18.0515	17.5997	18.734	18.8114	18.6759	17.6663	17.8657	17.4834	2			0.994756	0.00186241	138.08	15.799	89.08	-0.28879	118080000	401	2728840	0	186250	0	0	193340	0	0
	1.46863	-0.500494	+	2.47341	0.860757	+	3.79944	1.36125	Q9BY84	501	Q9BY84	Q9BY84	Dual specificity protein phosphatase 16	DUSP16	S				yes		SVRTSSSGTAQRSLLSPLHRSGSVEDNYHTS	17.3359	17.01	16.8994	18.0176	17.8679	17.9421	16.6648	16.4044	16.6747	3			0.99999	0.00520591	105.2	76.683	105.2	-0.10008	109440000	501	1510990	1127.9	132010	0	0	95792	0	0
	0.677777	0.149483	+	2.7168	0.729703	+	2.71208	0.58022	Q9BY89	1441	Q9BY89	Q9BY89	Uncharacterized protein KIAA1671	KIAA1671	S						HEARERRREQPKGRPSLTGENLEAKMGPCWW	14.5496	14.6352	14.8296	15.3932	15.3064	15.5038	14.9212	14.8153	14.7262	3			0.992683	0.00275105	82.59	64.725	82.59	-0.14118	31520000	1441	304843	0	19843	0	0	19313	0	0
	0.0531403	0.0221767	+	1.99529	-0.394638	+	1.33586	-0.416815	Q9NQW6	642	Q9NQW6	Q9NQW6	Actin-binding protein anillin	ANLN	S			yes			STPRLELKDTSRSDESPKPGKFQRTRVPRAE	18.4262	18.401	18.2409	18.0078	17.8359	18.0405	18.1547	18.6099	18.3701	3			0.998469	0.00170404	98.281	73.871	68.944	0.32812	89129000	642	2828990	11420	277110	0	0	244730	0	0
+	1.53847	0.95835	+	2.22763	1.47695	+	1.67726	0.518595	Q9BY89	774	Q9BY89	Q9BY89	Uncharacterized protein KIAA1671	KIAA1671	S						LRSLRSWLSLKDRQLSQEVTPADLECGLEGQ	12.3914	13.0322	12.1473	13.9242	14.1659	13.9116	13.3173	13.6999	13.4288	2			0.992949	0.0172562	56.529	48.034	56.529	-0.63787	27484000	774	106022	0	4572.4	0	0	6553	0	0
	0.899667	0.240729	+	3.90135	1.51534	+	3.07111	1.27461	Q9BZL6	214	Q9BZL6	Q9BZL6	Serine/threonine-protein kinase D2	PRKD2	S						TSLASGHSVRLGTSESLPCTAEELSRSTTEL	14.7576	14.6079	14.7864	16.3519	16.0628	16.2832	15.0752	14.7344	15.0646	2			0.99971	8.07e-06	145.55	123.77	145.55	-0.96812	83574000	214	429381	530.24	22858	0	0	18962	0	0
[truncated: 6,021 more rows]
[truncated: 24 more columns]

## Sheet: In vitro dephos. of lysates
Significant PP1 vs Ctrl	p-value (-log10) PP1 vs Ctrl	log2-fold change (PP1/Ctrl)	Proteins	Positions within proteins	Leading proteins	Protein	Protein names	Gene names	Amino acid	Sequence window	Ctrl Rep1	Ctrl Rep2	Ctrl Rep3	PP1 Rep1	PP1 Rep2	PP1 Rep3	Localization probability	PEP	Score	Delta score	Score for localization	Mass error [ppm]	Intensity	Position
[truncated: 3,090 more rows]

[truncated: 2 more sheets: High confid. substrate cands, Skyline label free intensities]
